# Supplementary material
Source: ML conference proceedings conference paper supplement (https://openreview.net/forum?id=1WoK45MiYK)
Supplement: supplementary_material [file attachment]

# Visual Comparison of COCO-LC

a wooden table with  
a **purple** laptop and  
**orange** pen

description

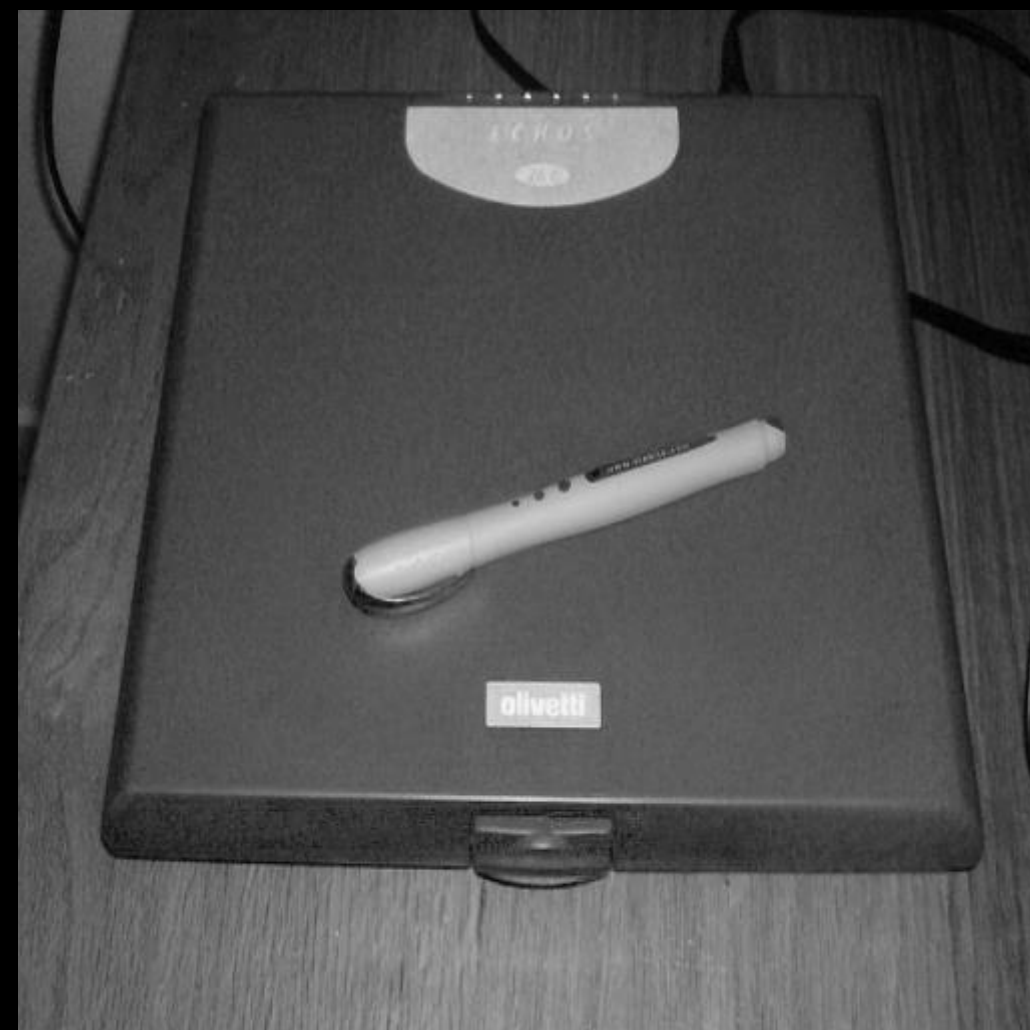

Input

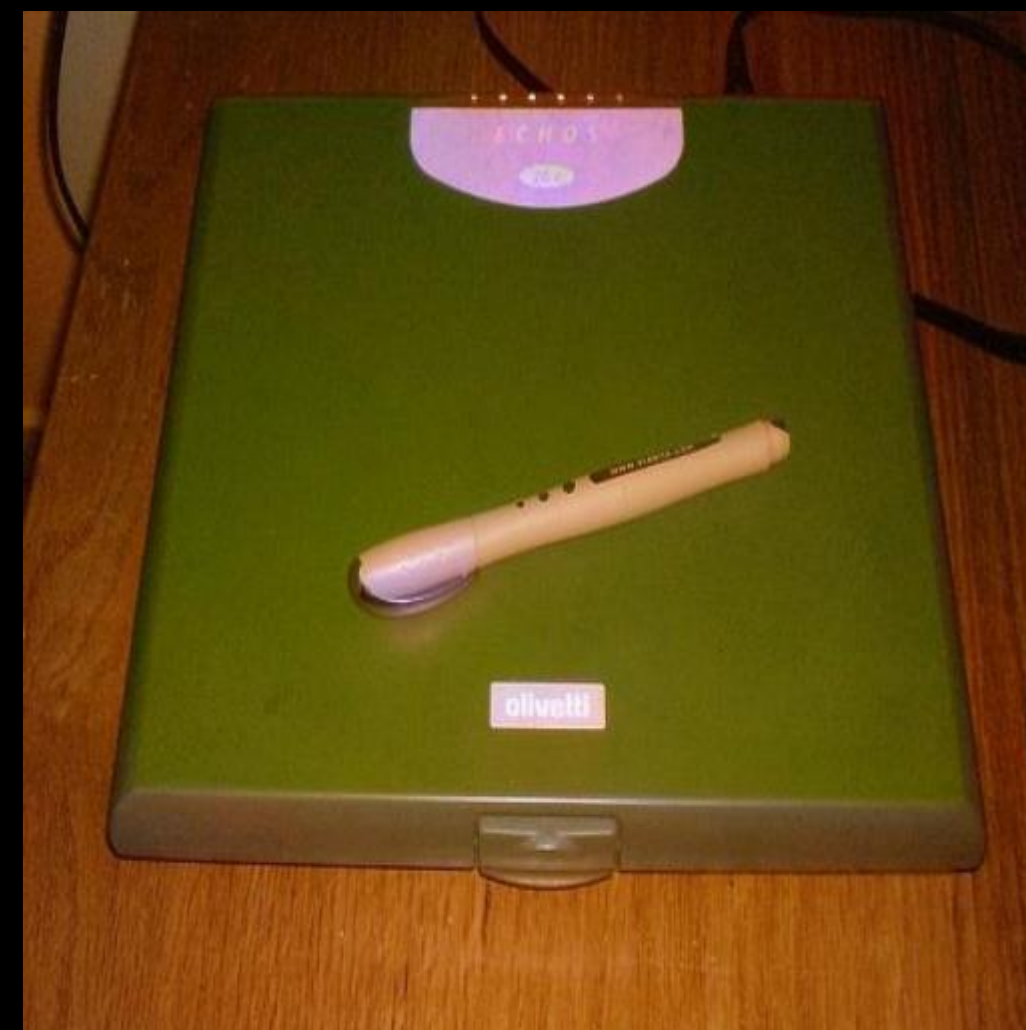

UniColor

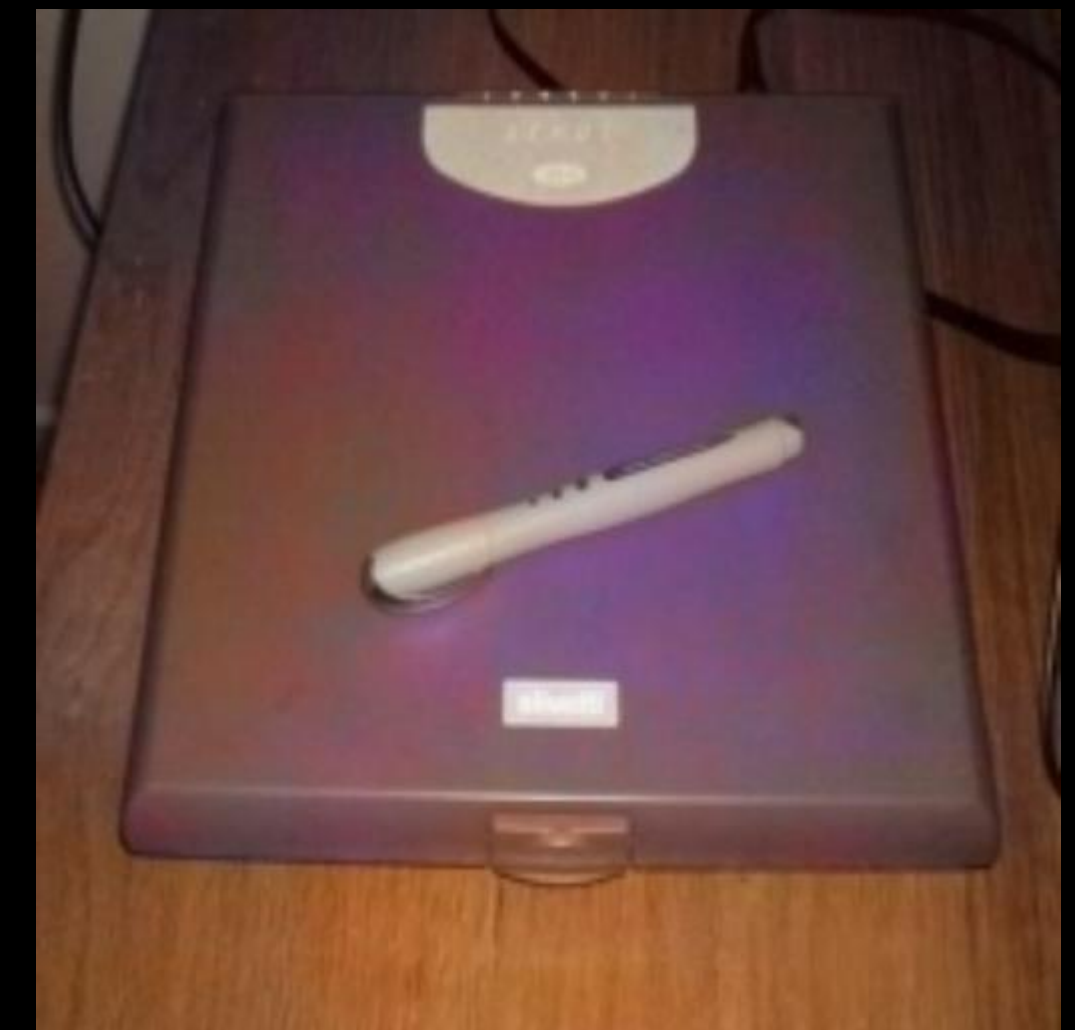

L-CoDe

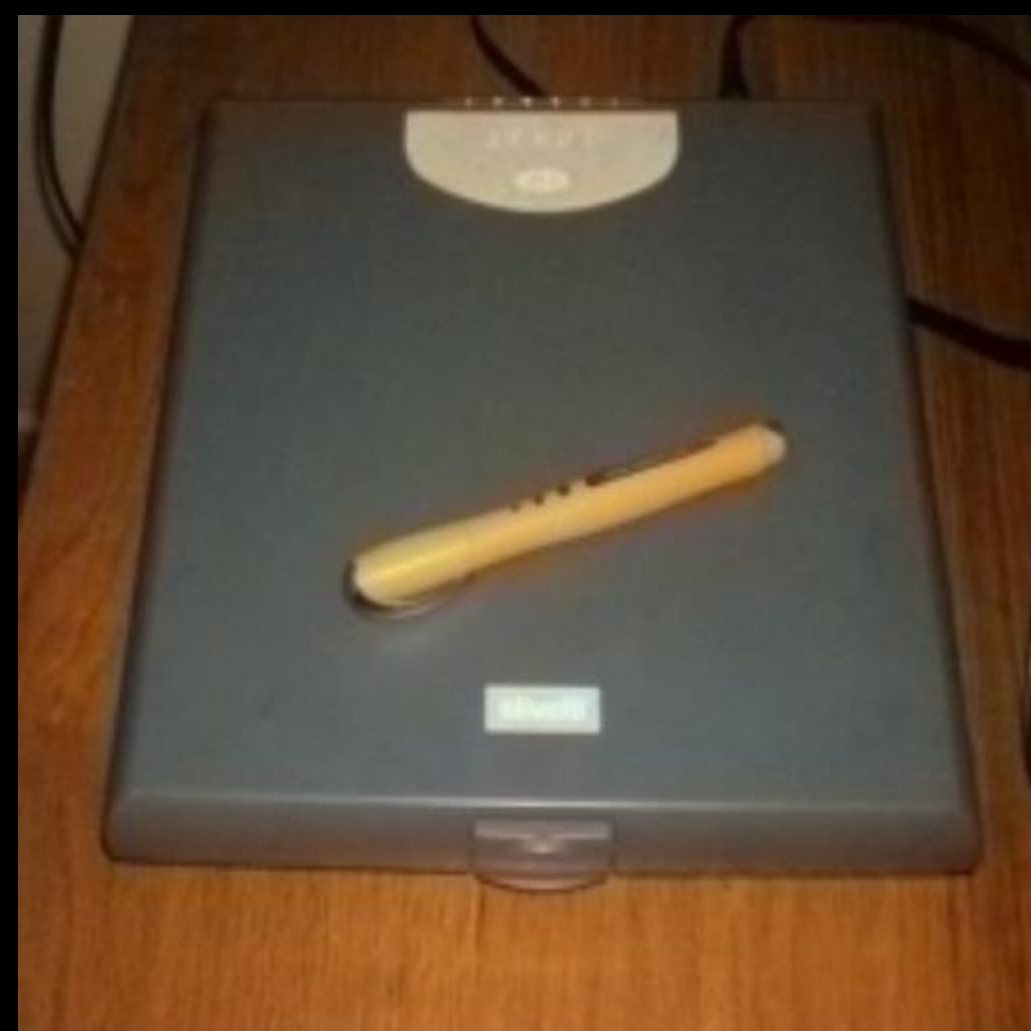

L-CoDer

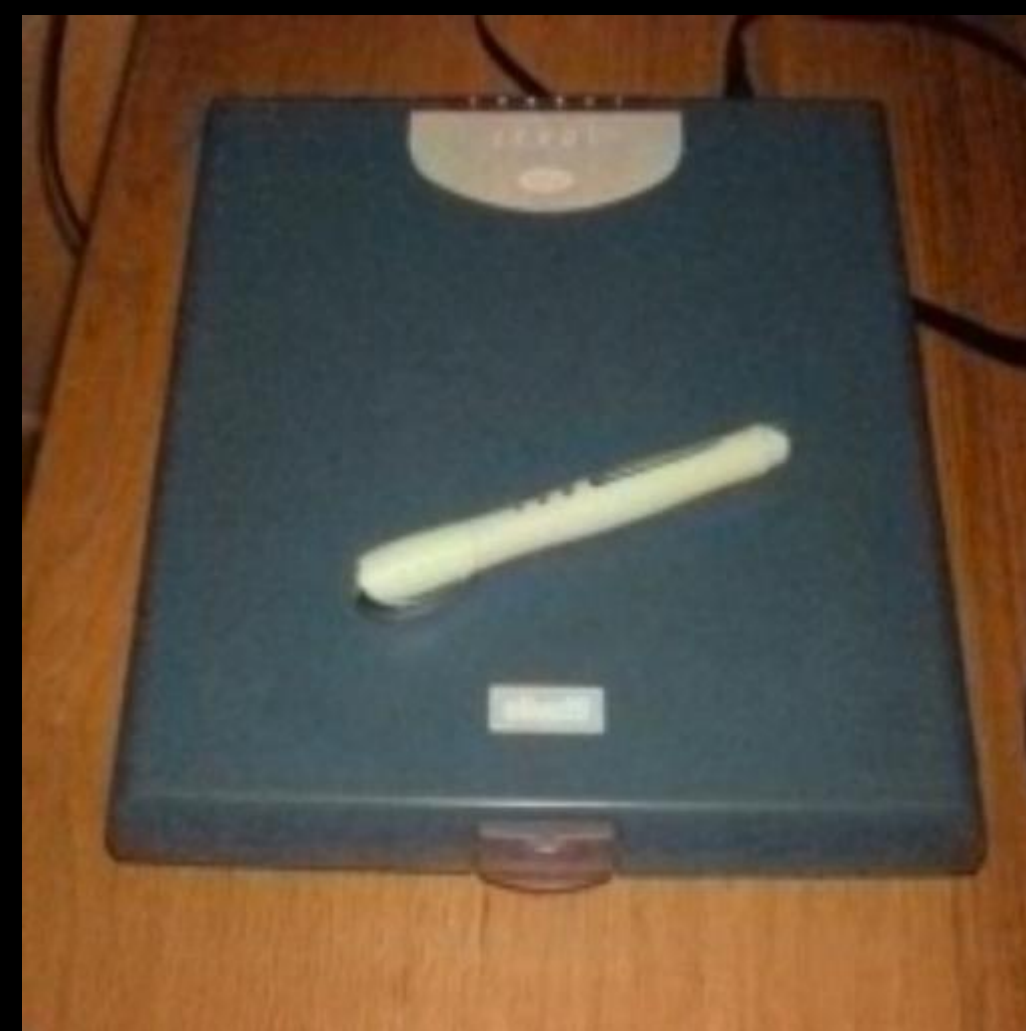

L-CoIns

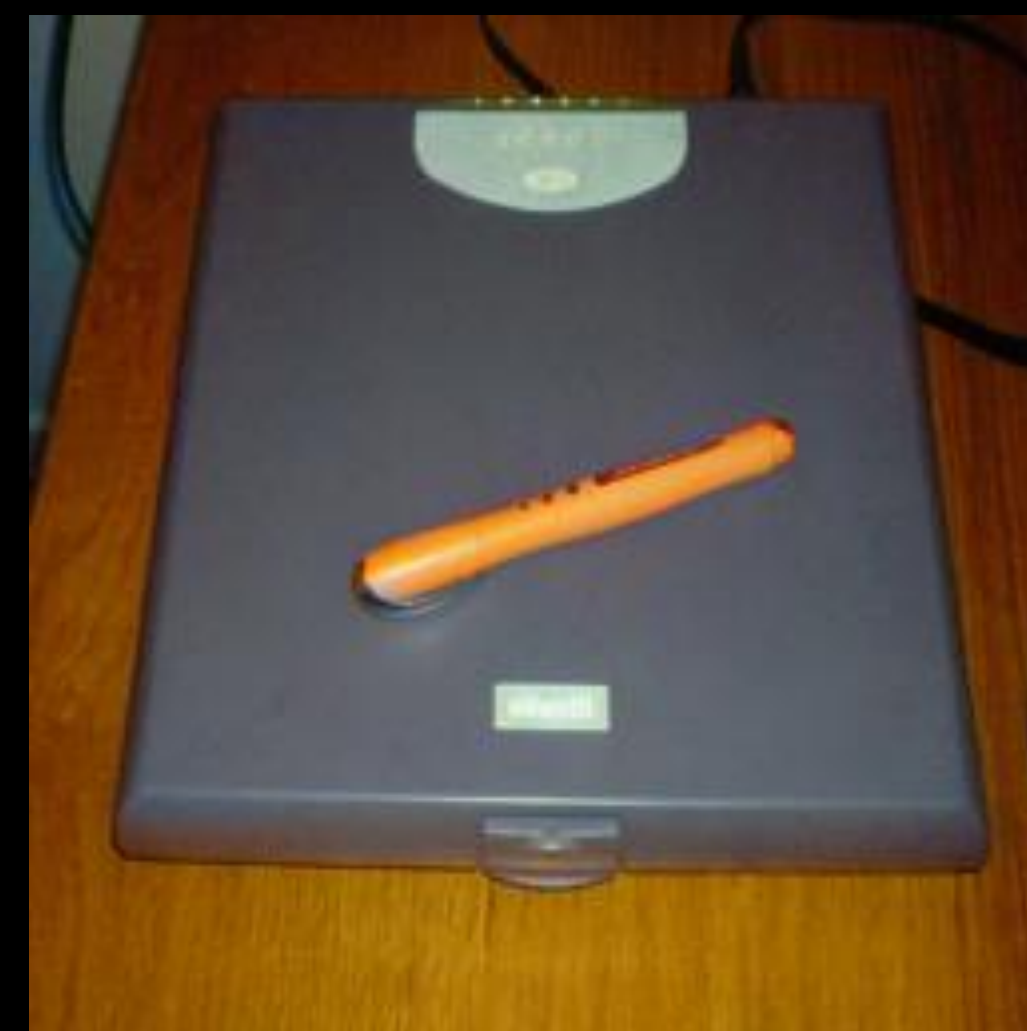

L-CAD

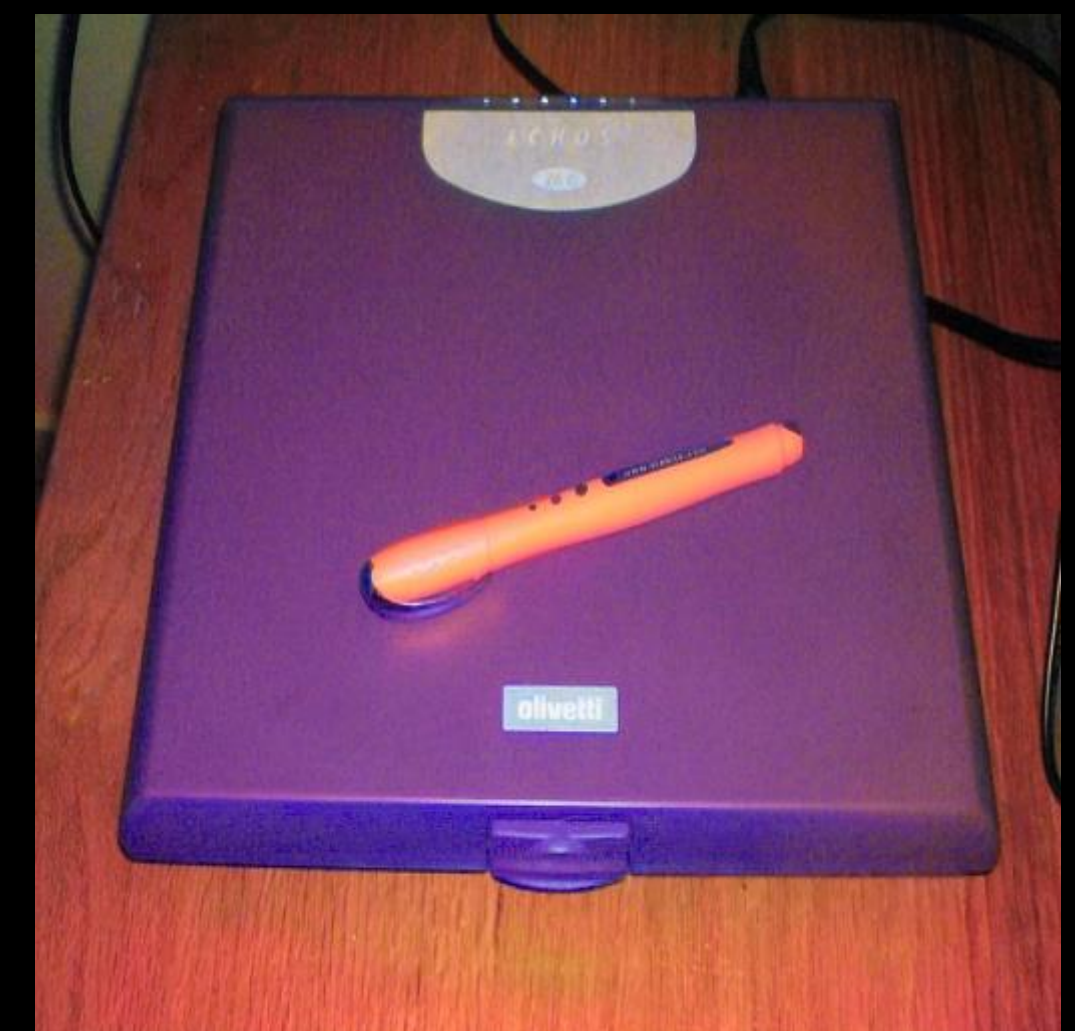

Ours



a large white polar bear swimming in a pool of blue water

description

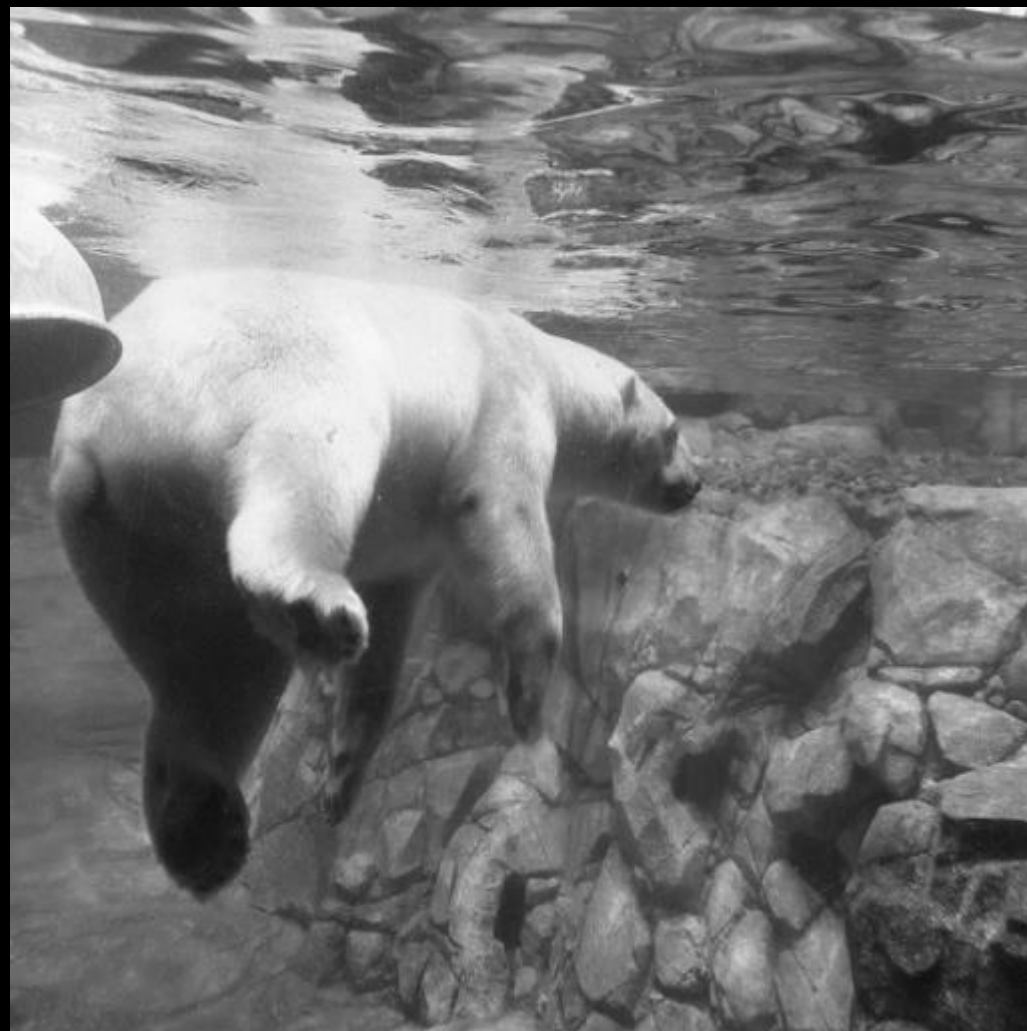

Input

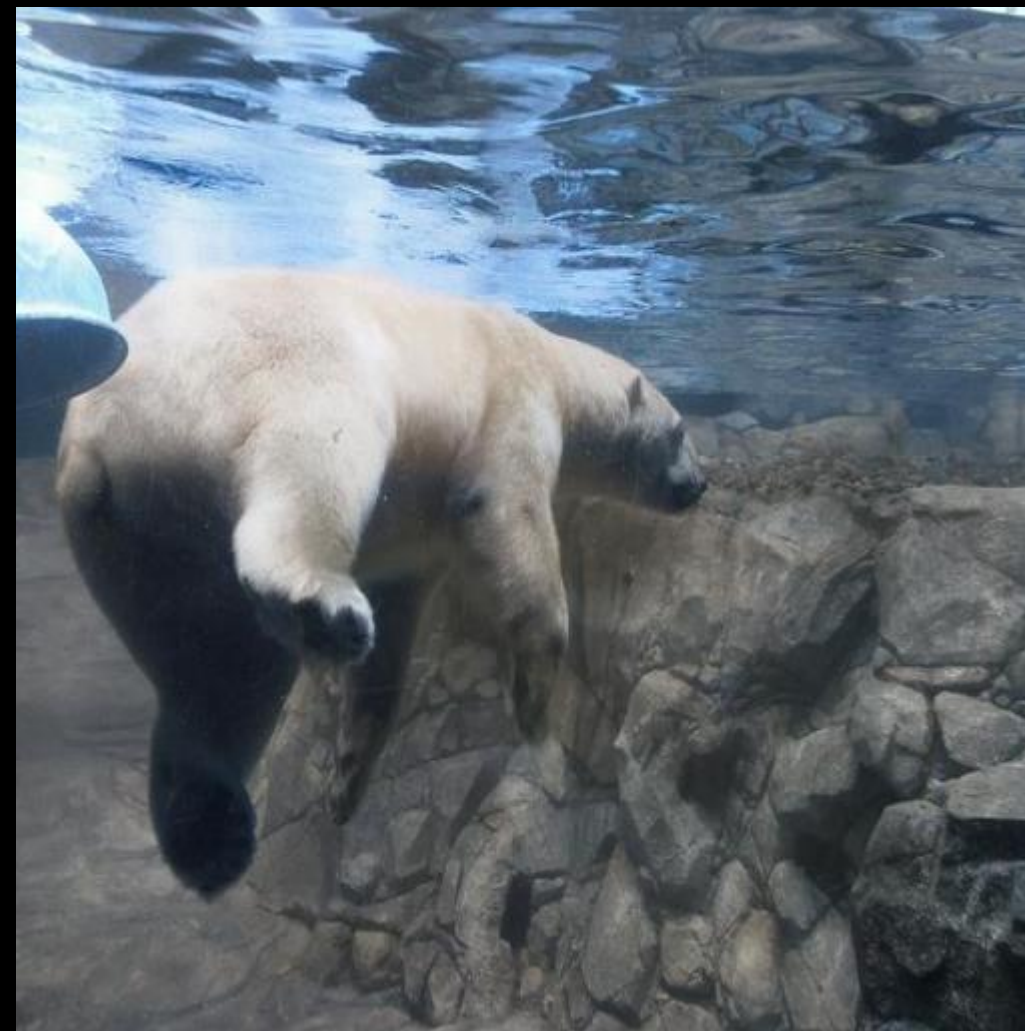

UniColor

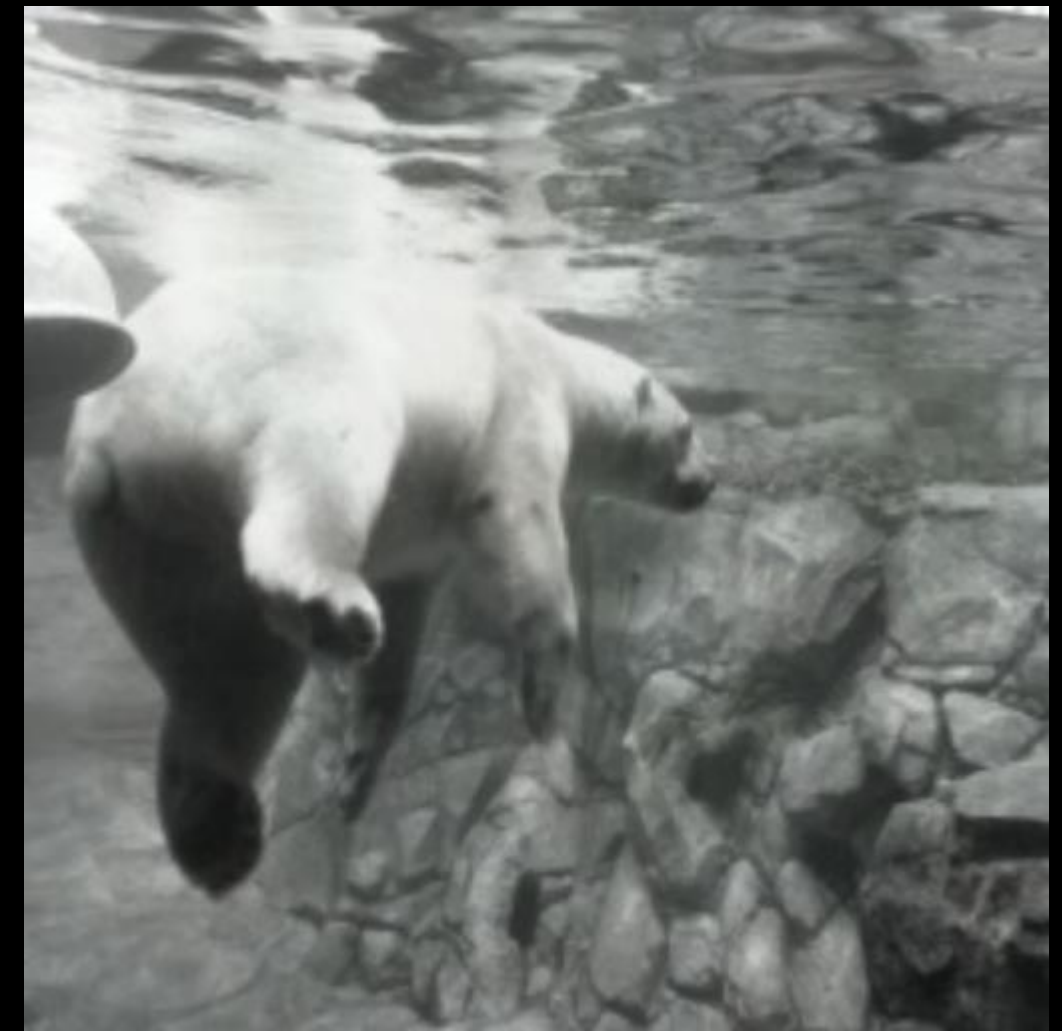

L-CoDe

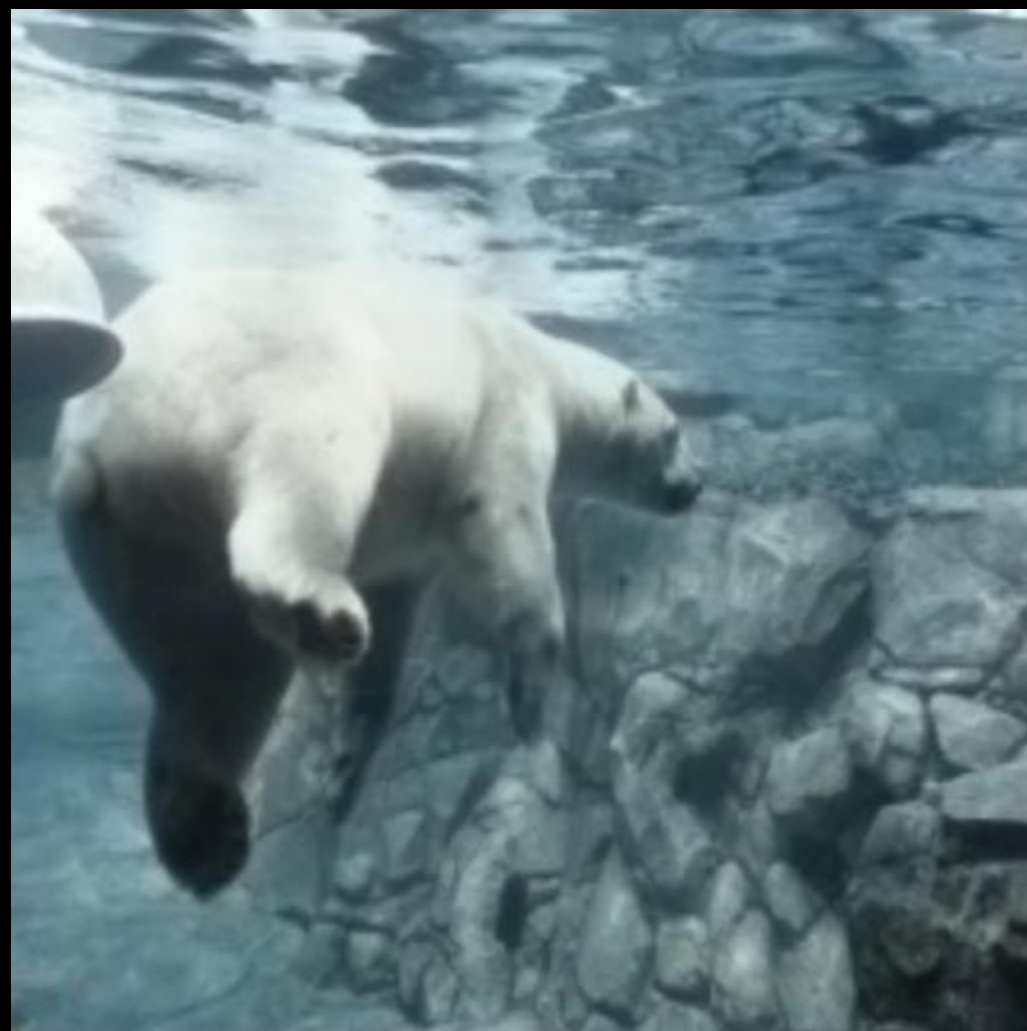

L-CoDer

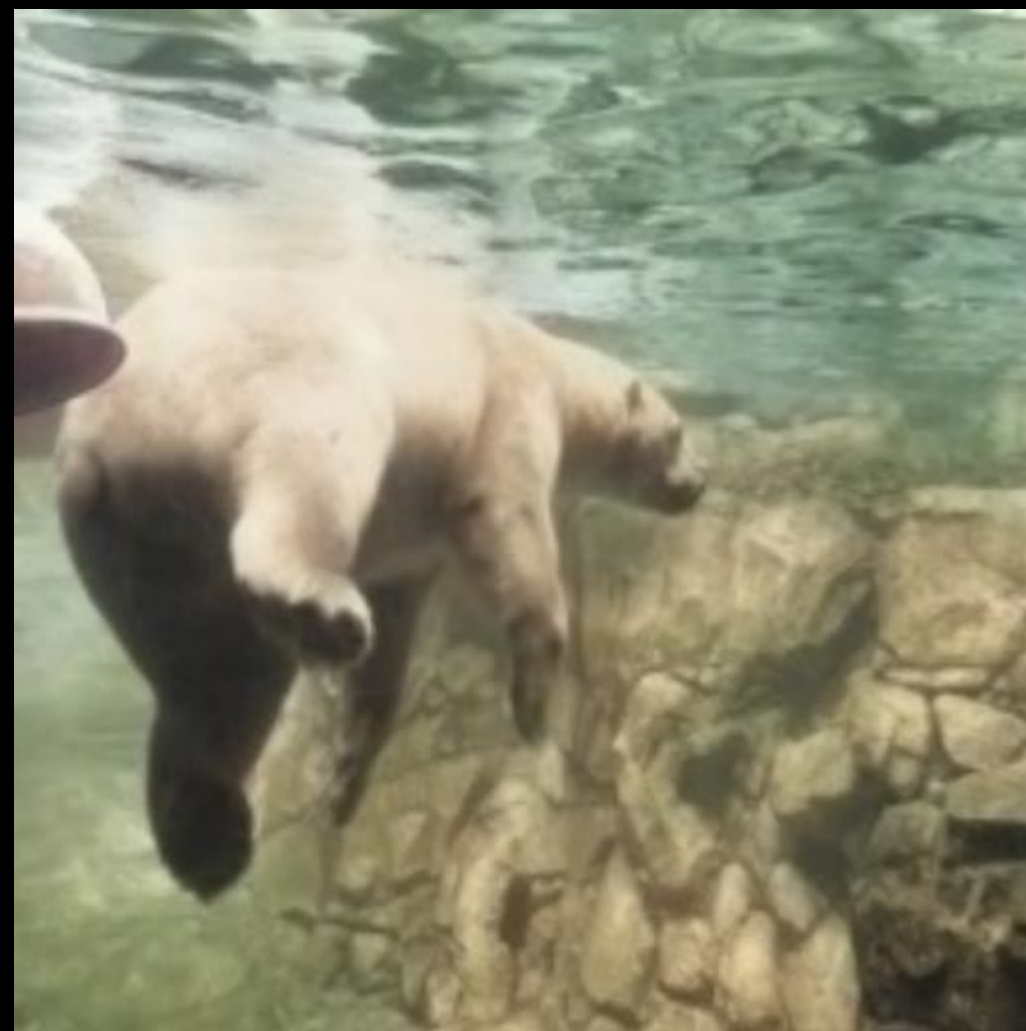

L-CoIns

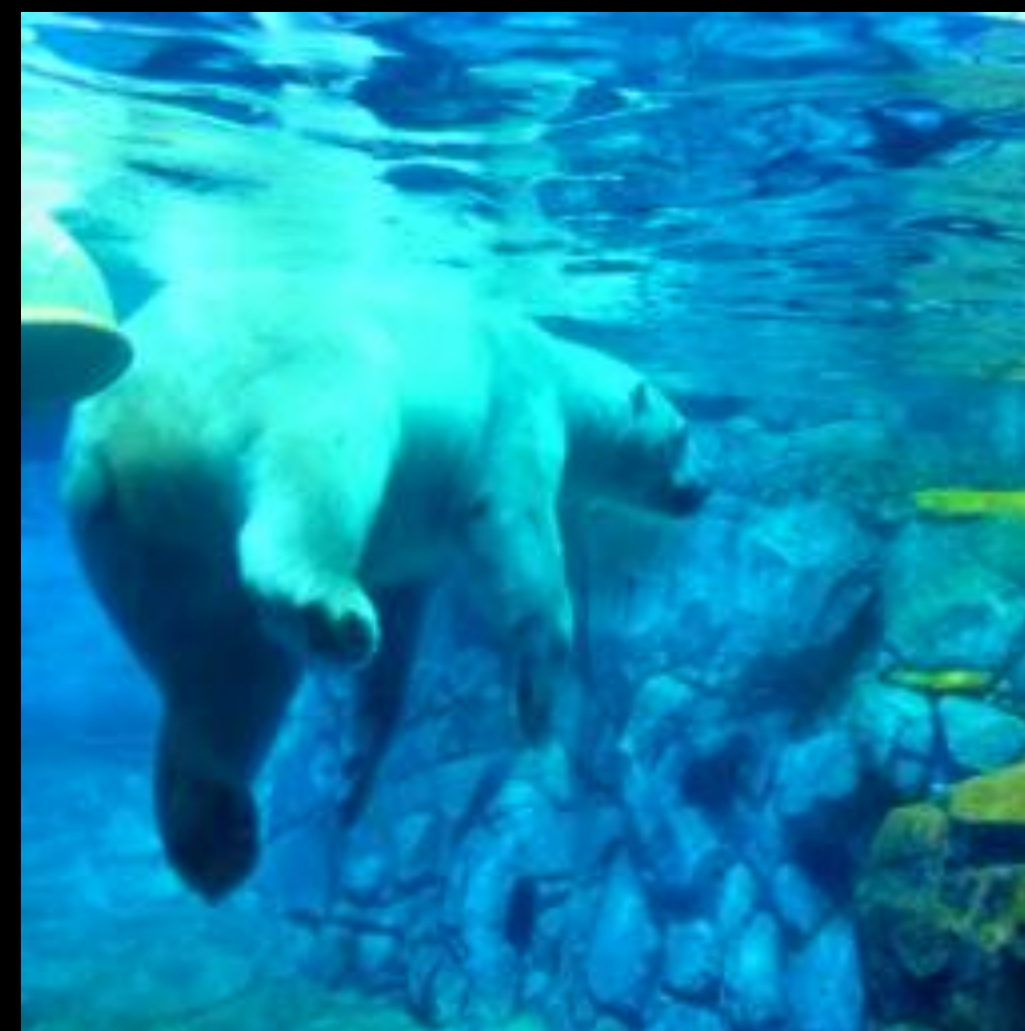

L-CAD

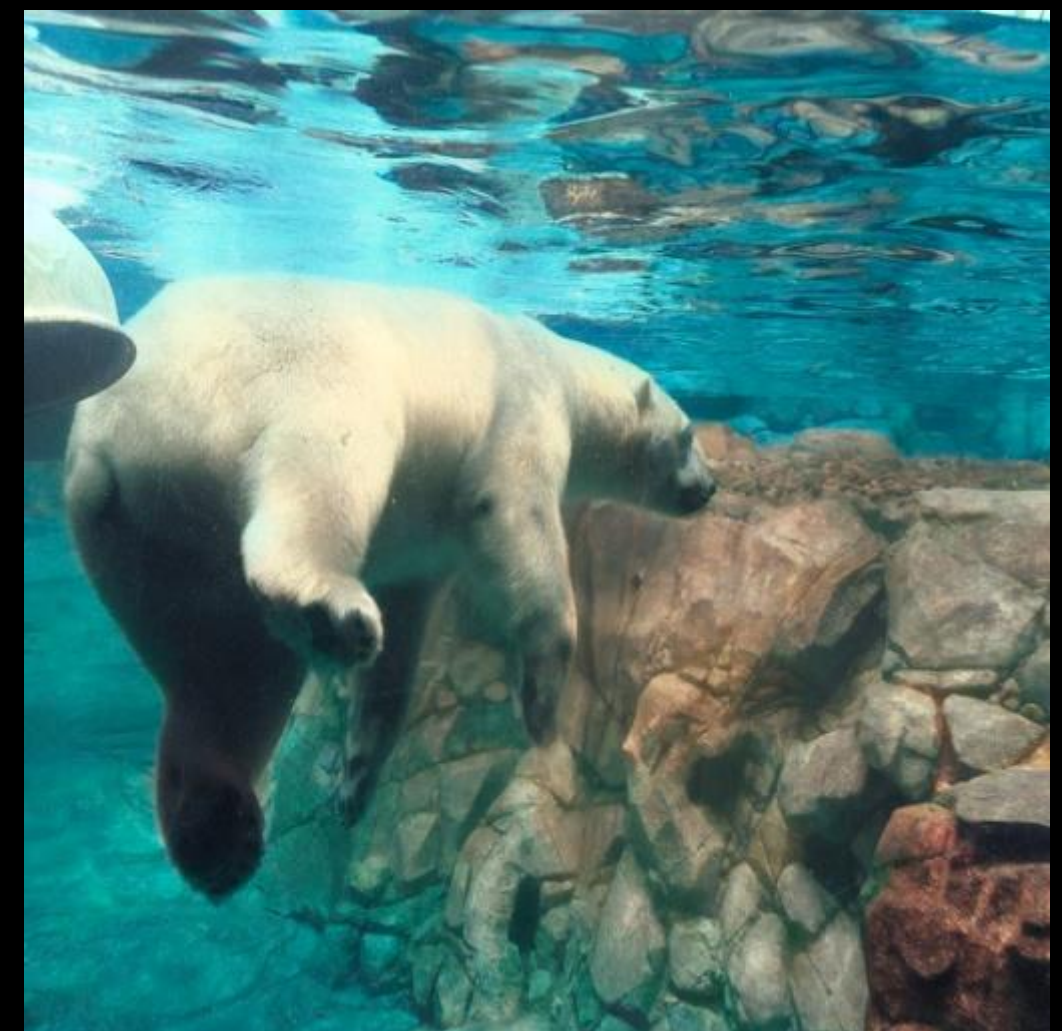

Ours



a young boy flying  
a colorful kite on  
top of a sidewalk

description

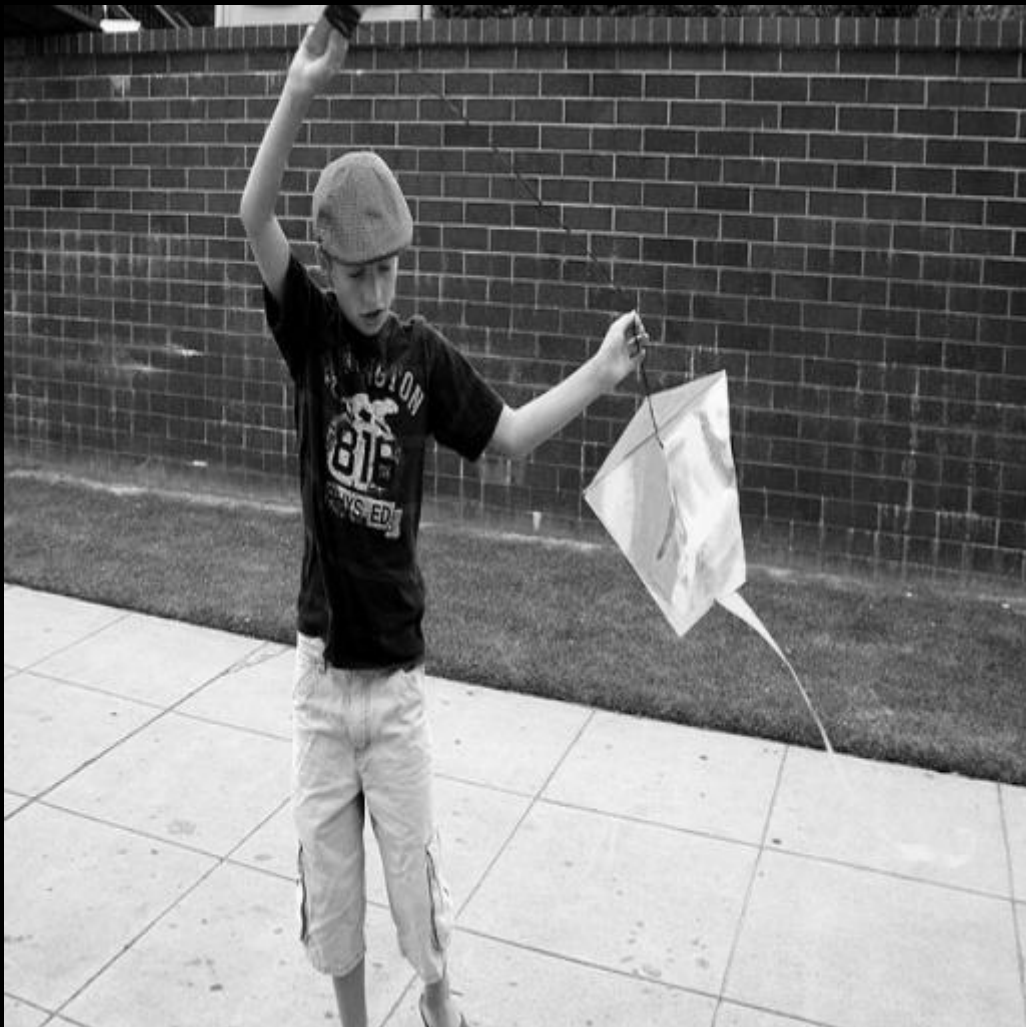

Input

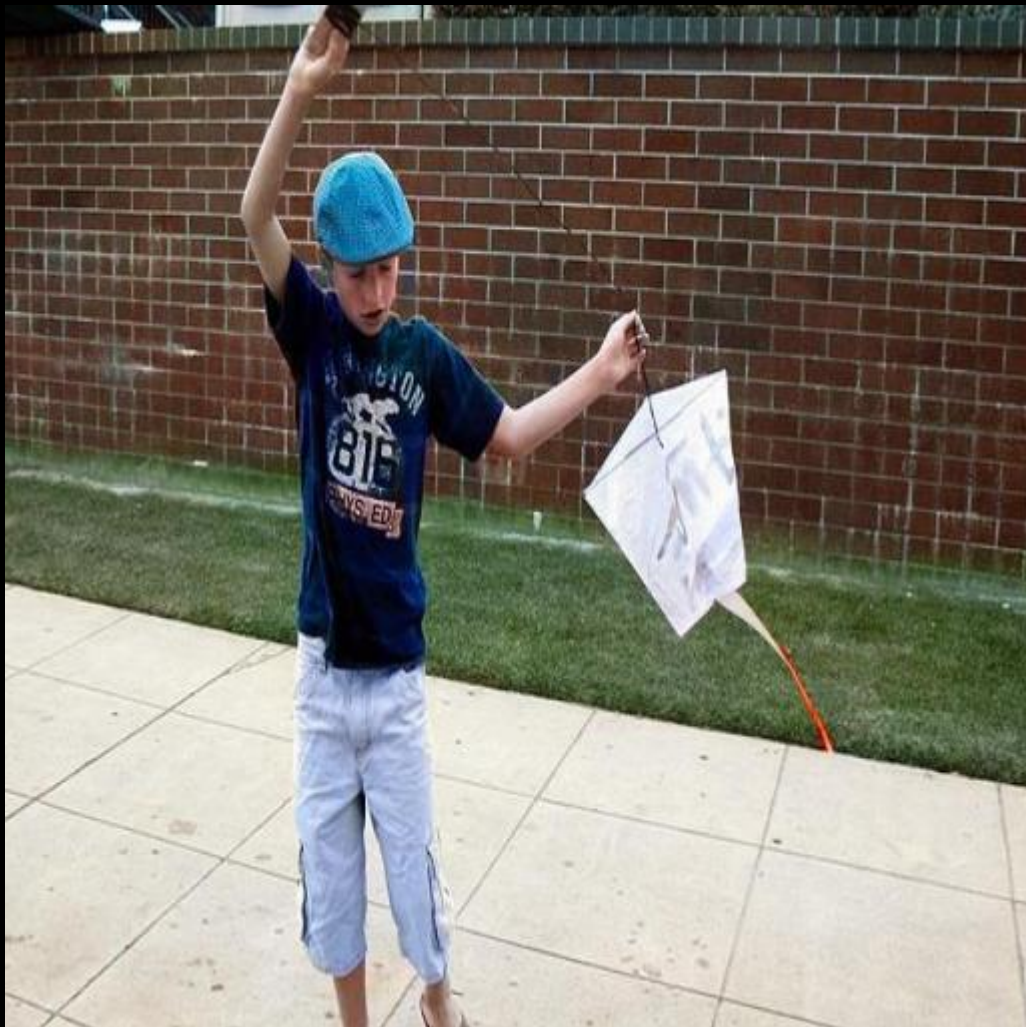

UniColor

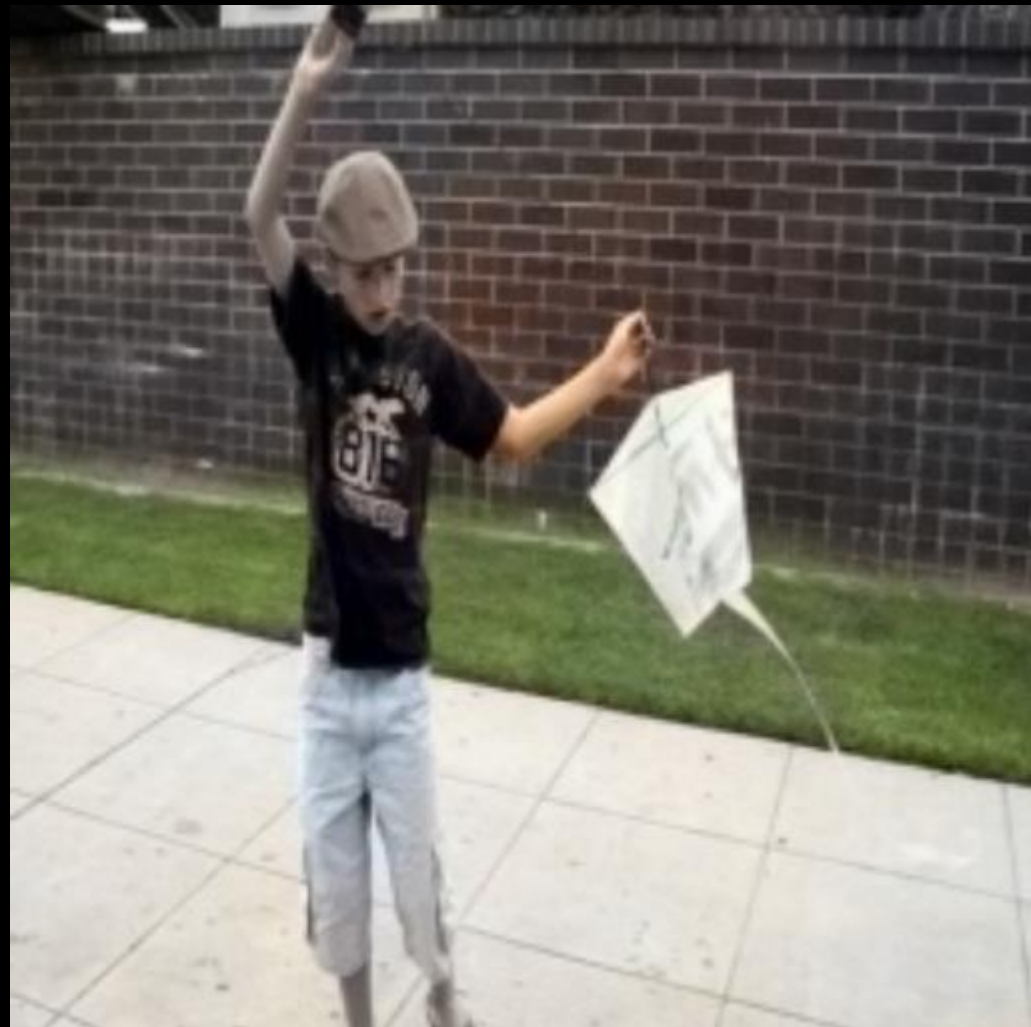

L-CoDe

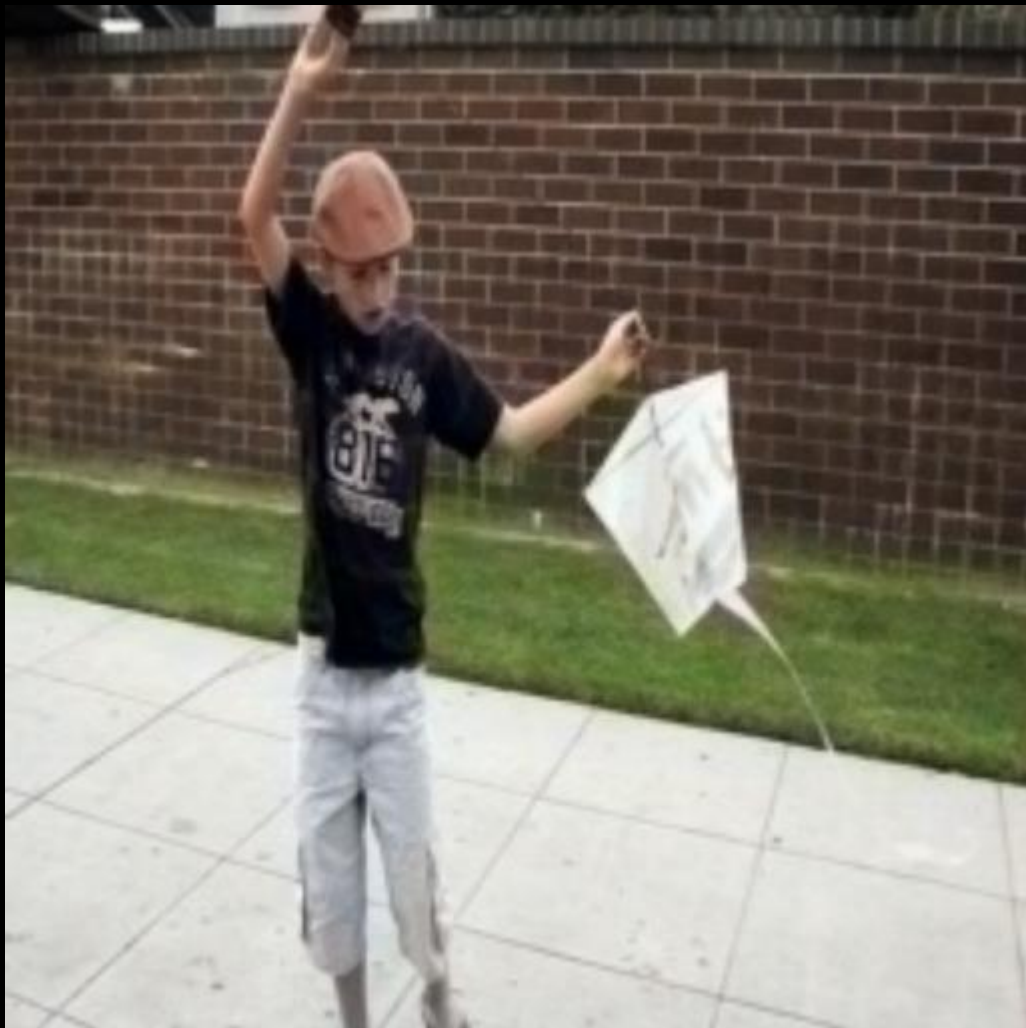

L-CoDer

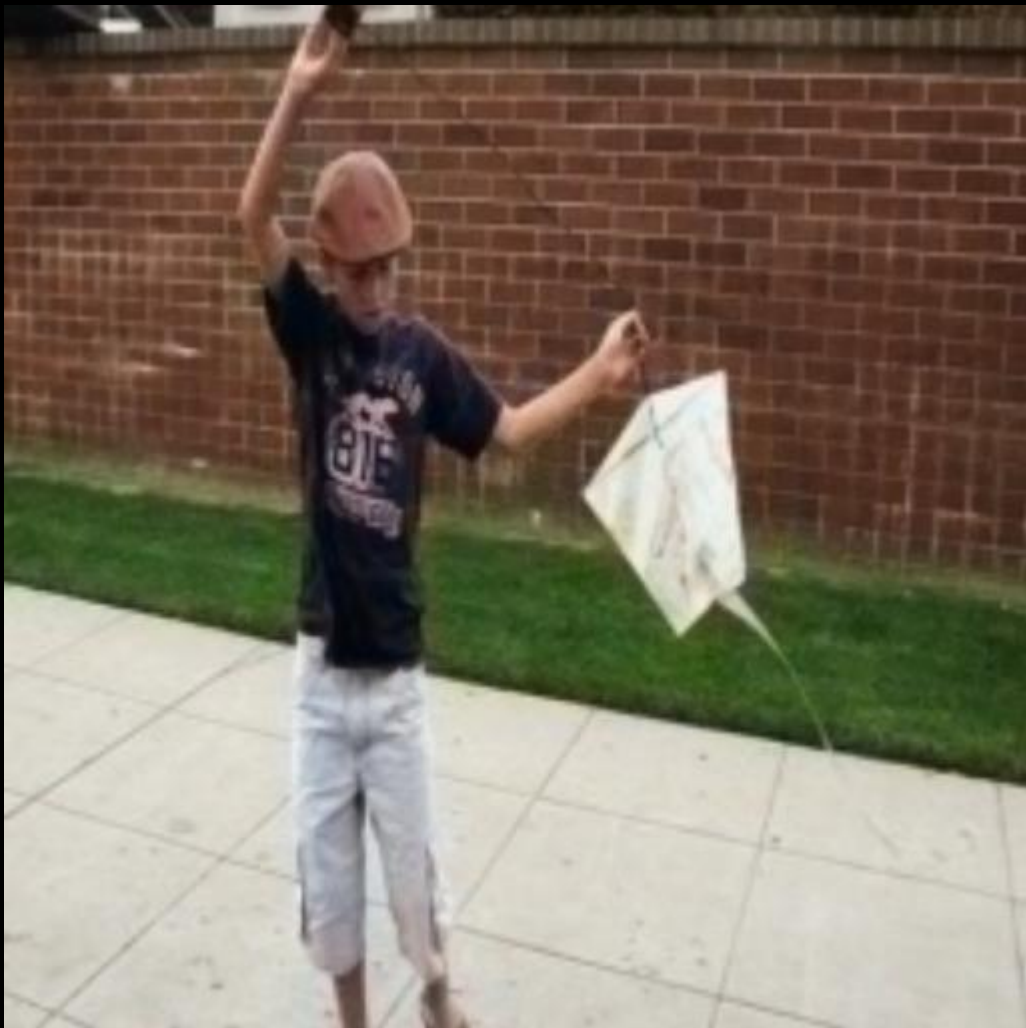

L-CoIns

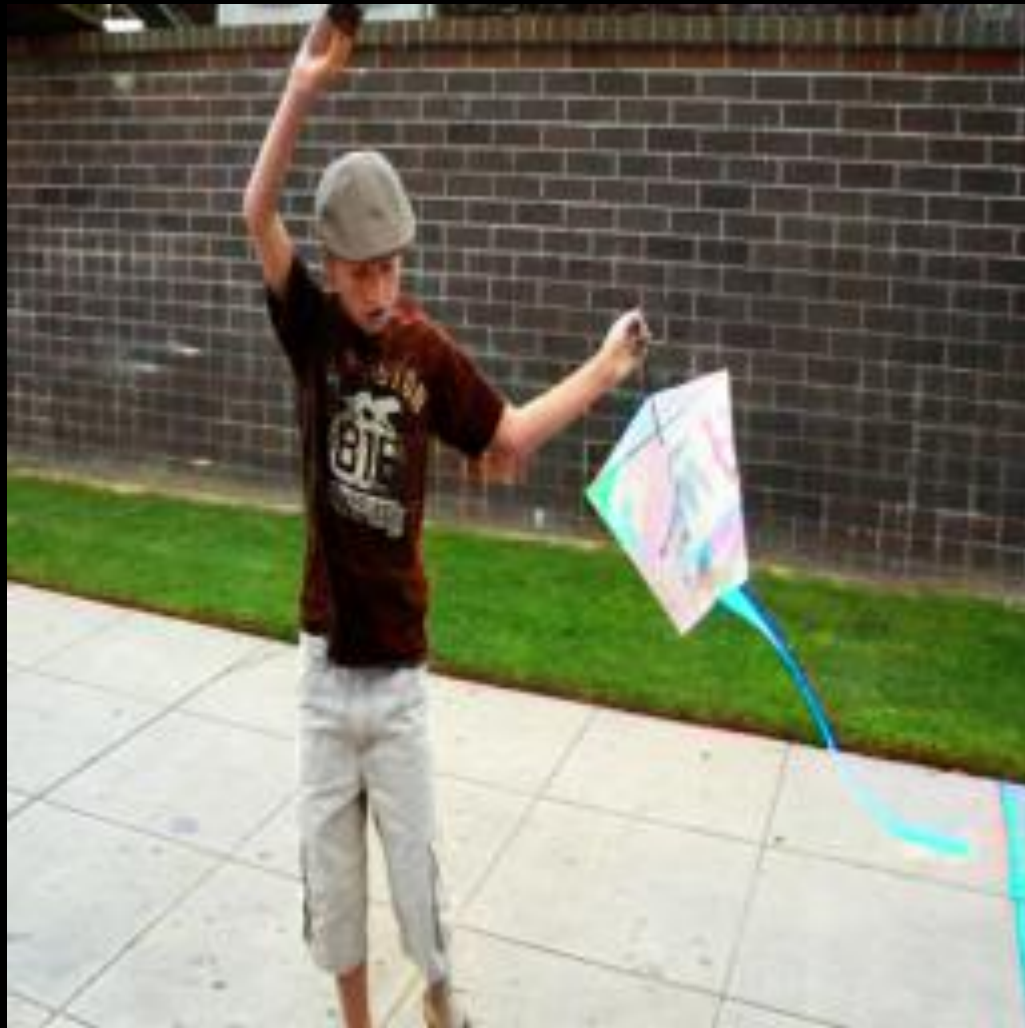

L-CAD

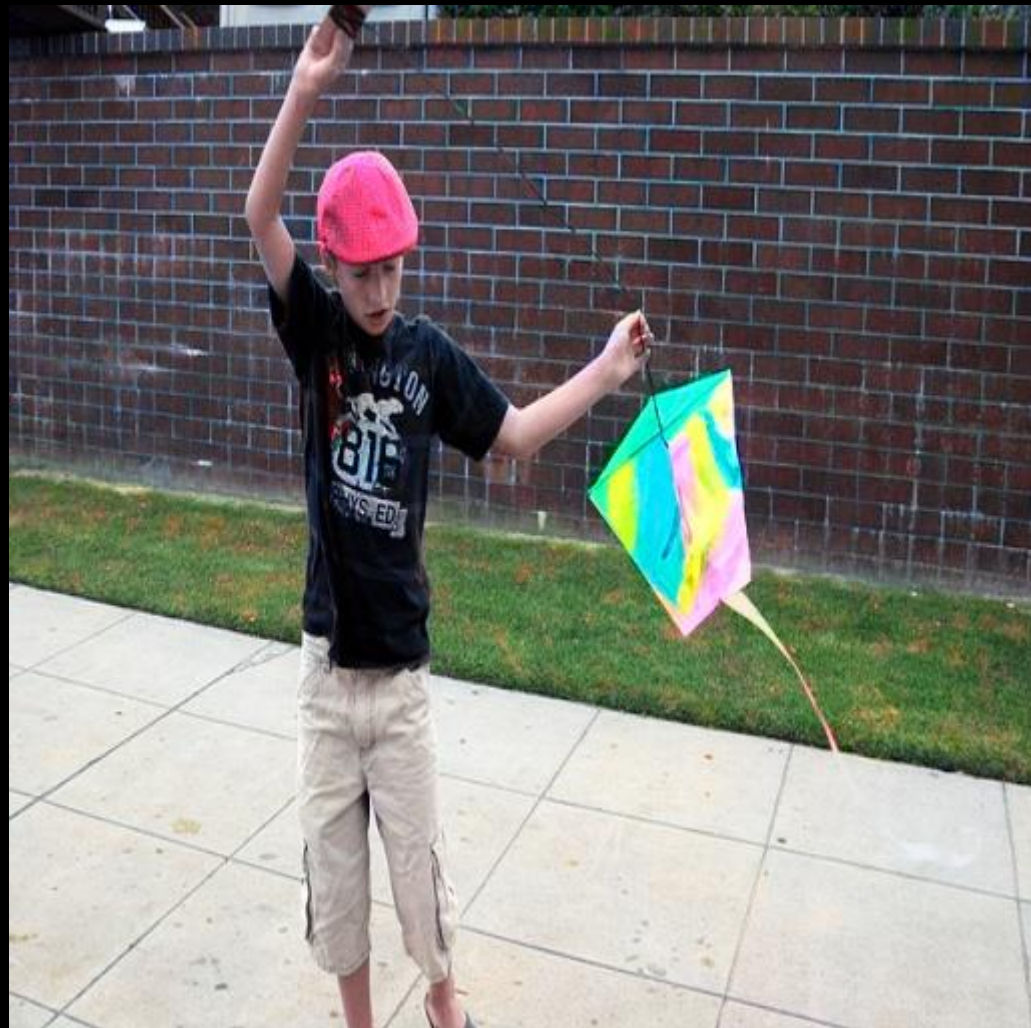

Ours



a giraffe standing in  
front of a grassy  
plain and **blue** sky

description

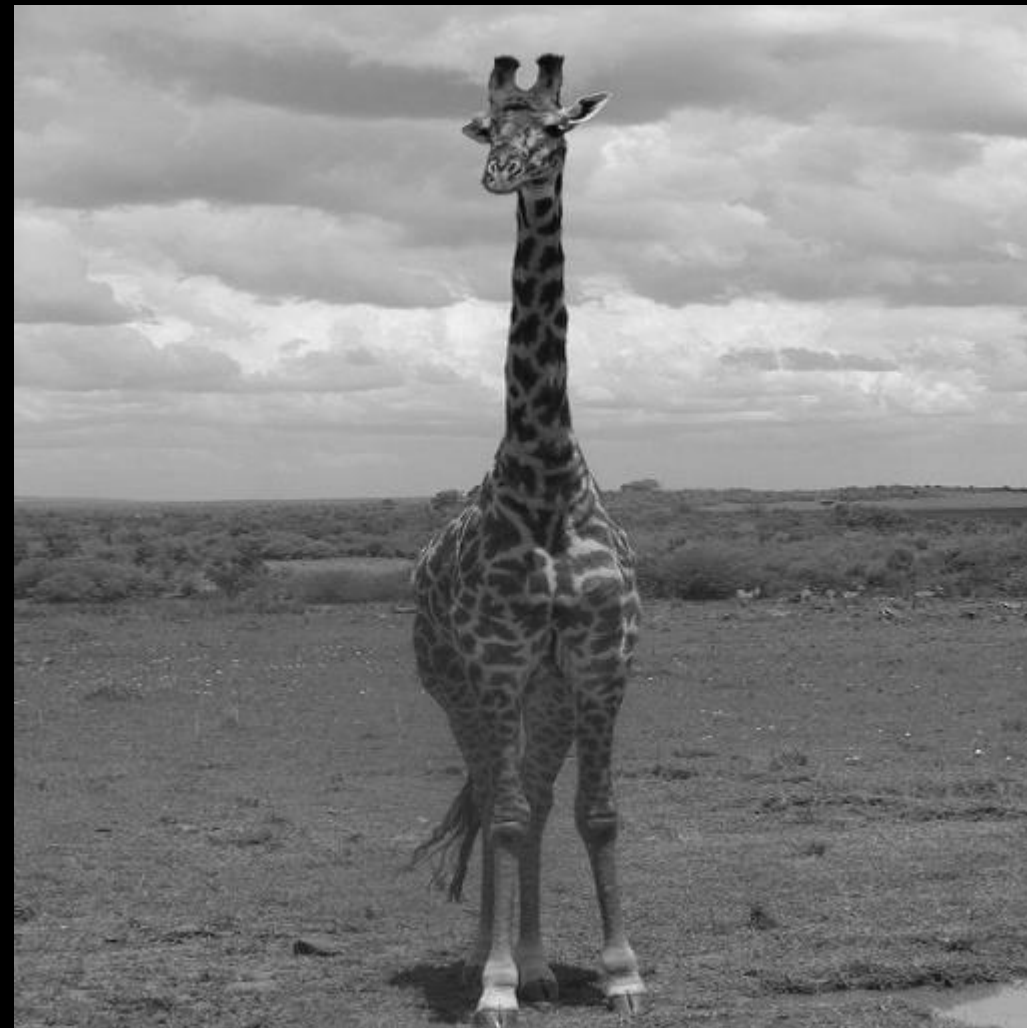

Input

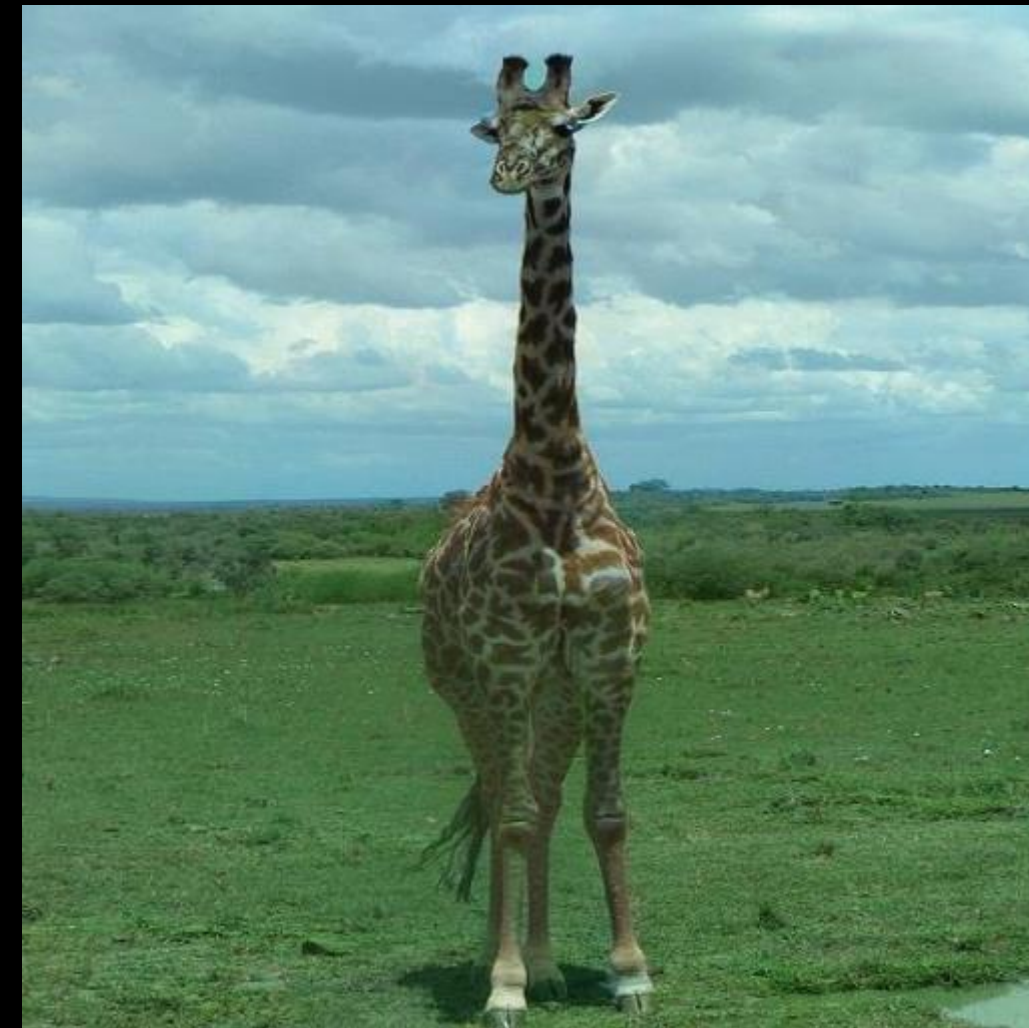

UniColor

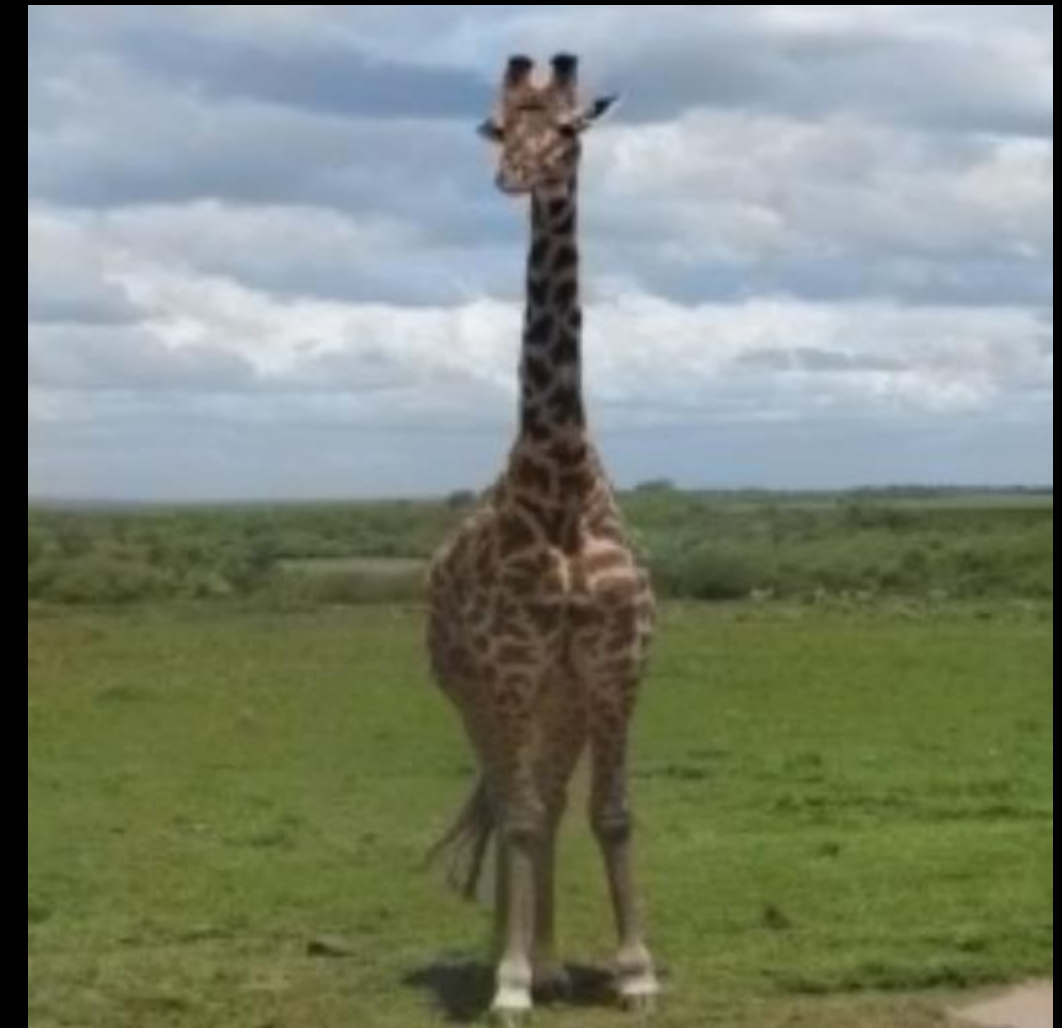

L-CoDe

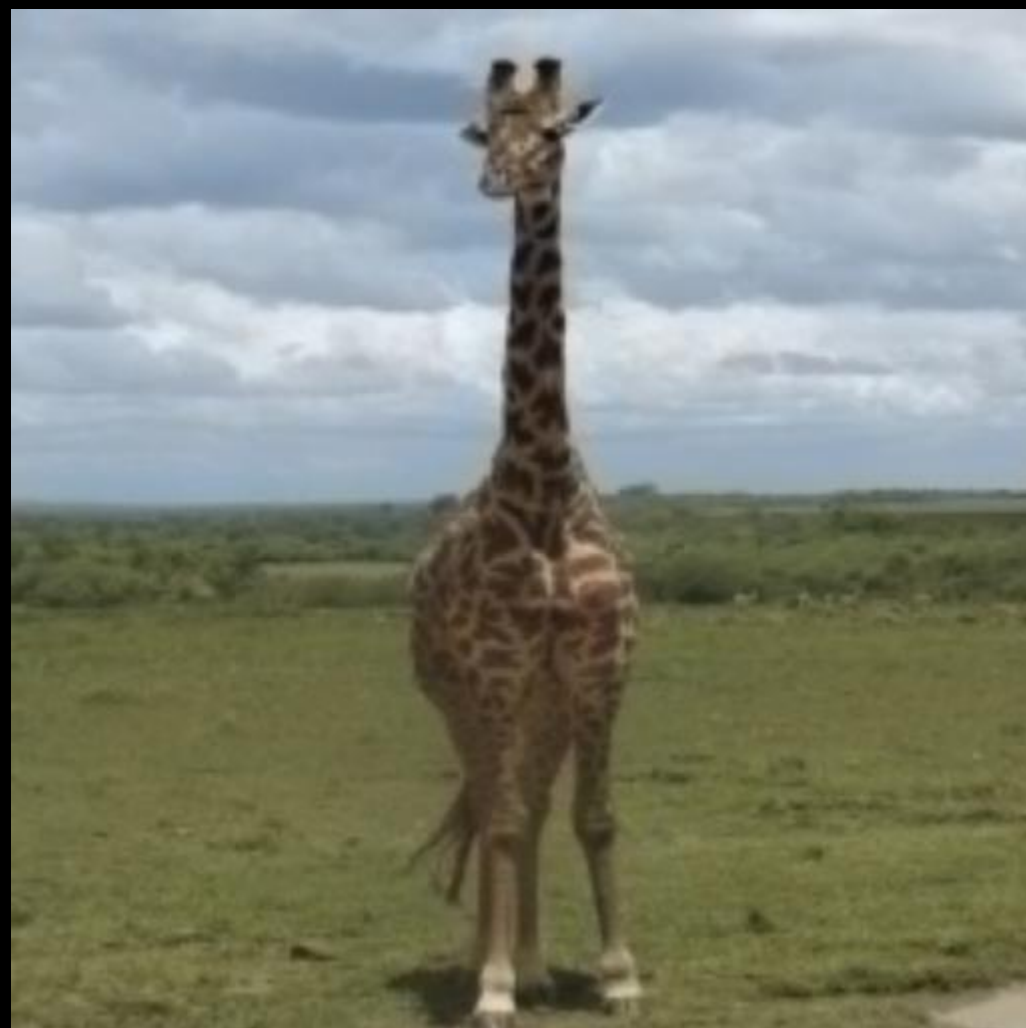

L-CoDer

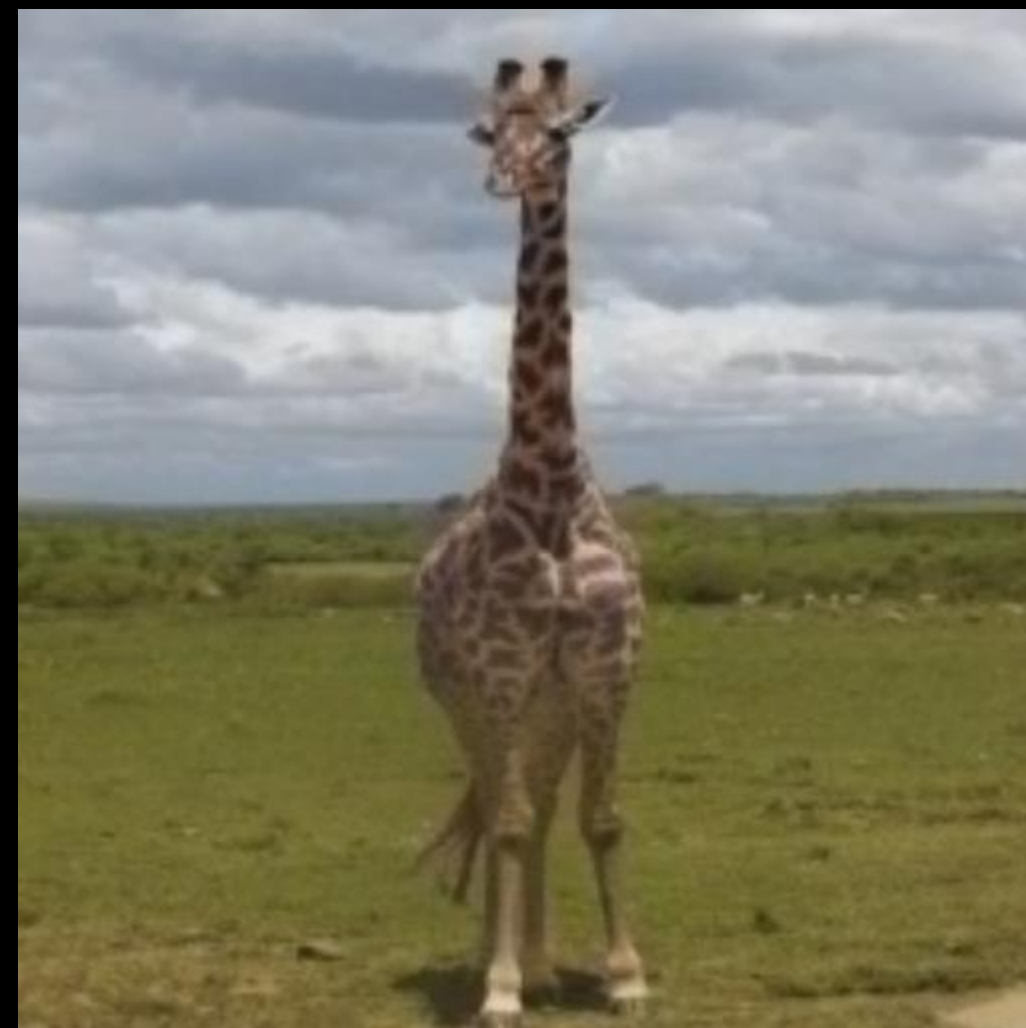

L-CoIns

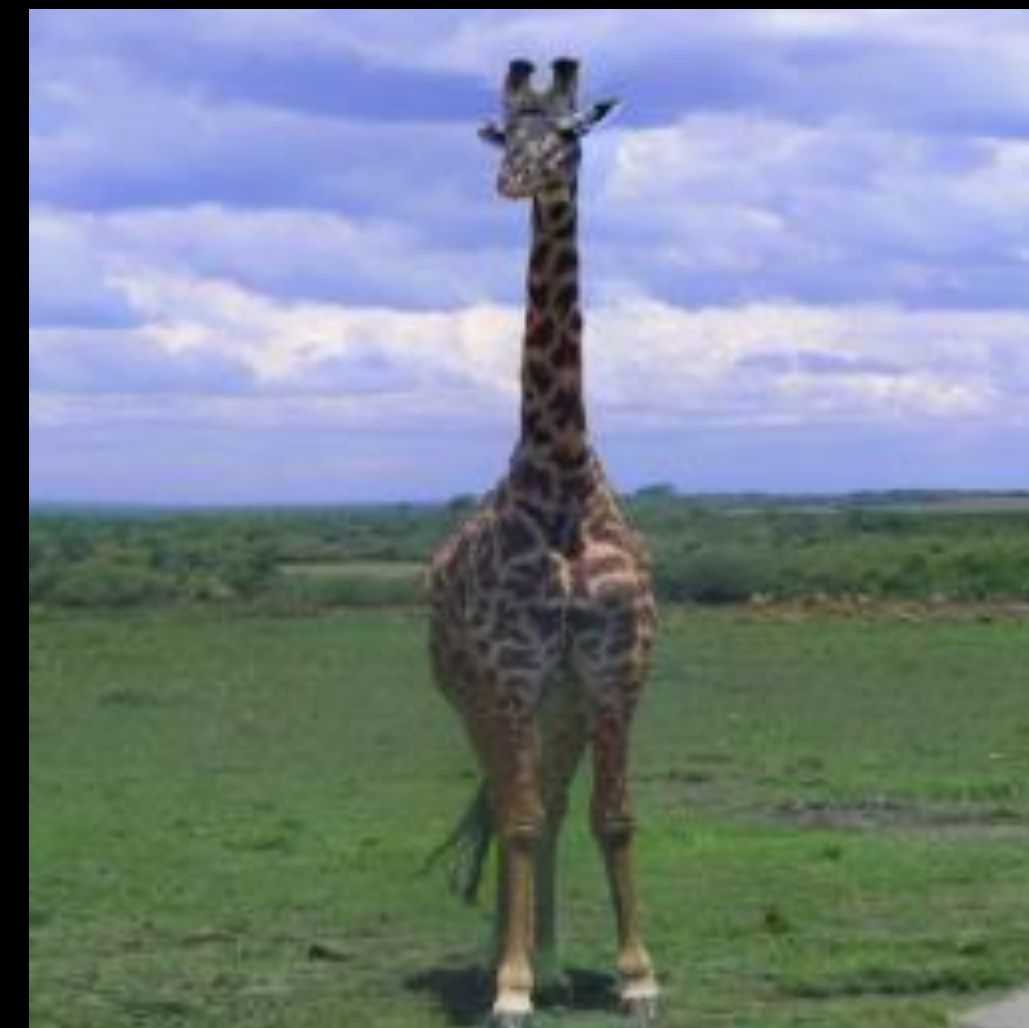

L-CAD

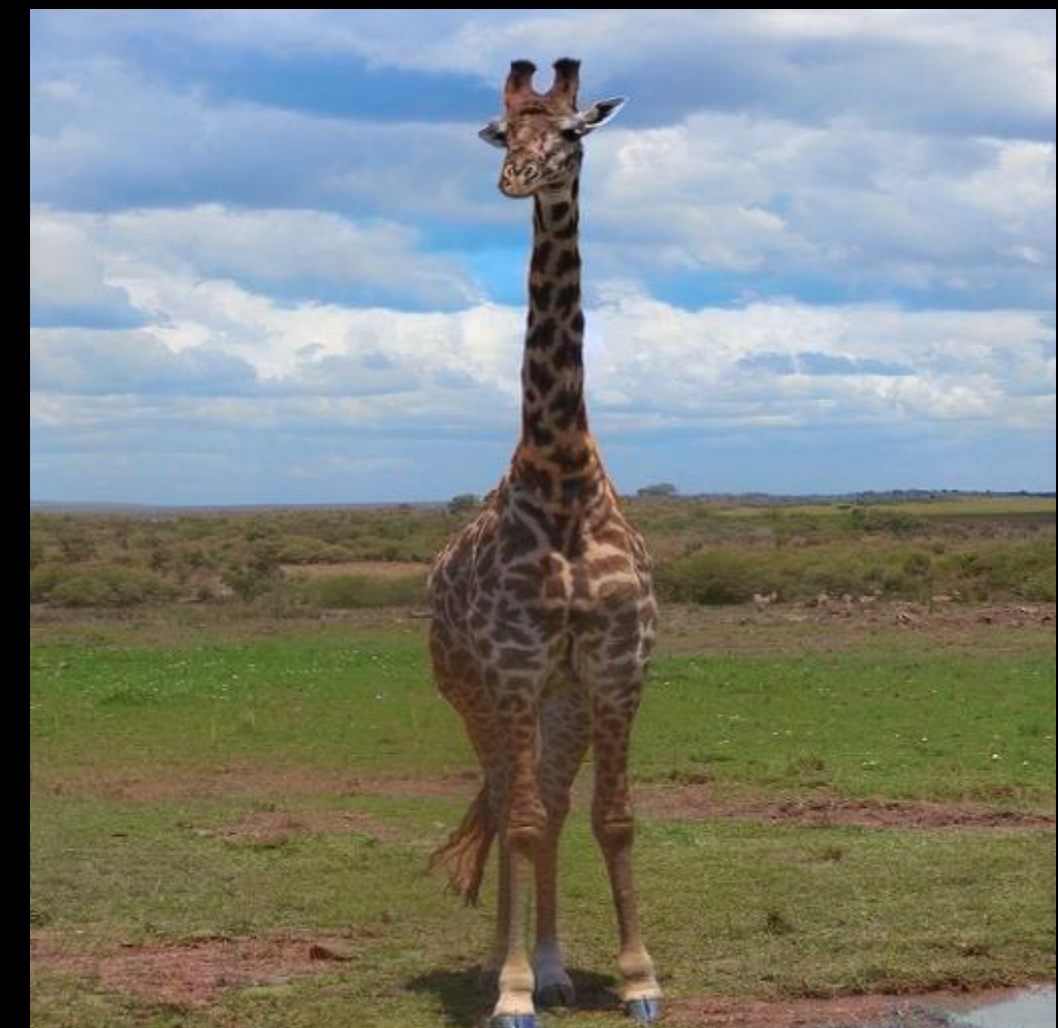

Ours



a woman throwing  
a frisbee in a **green**  
field

description

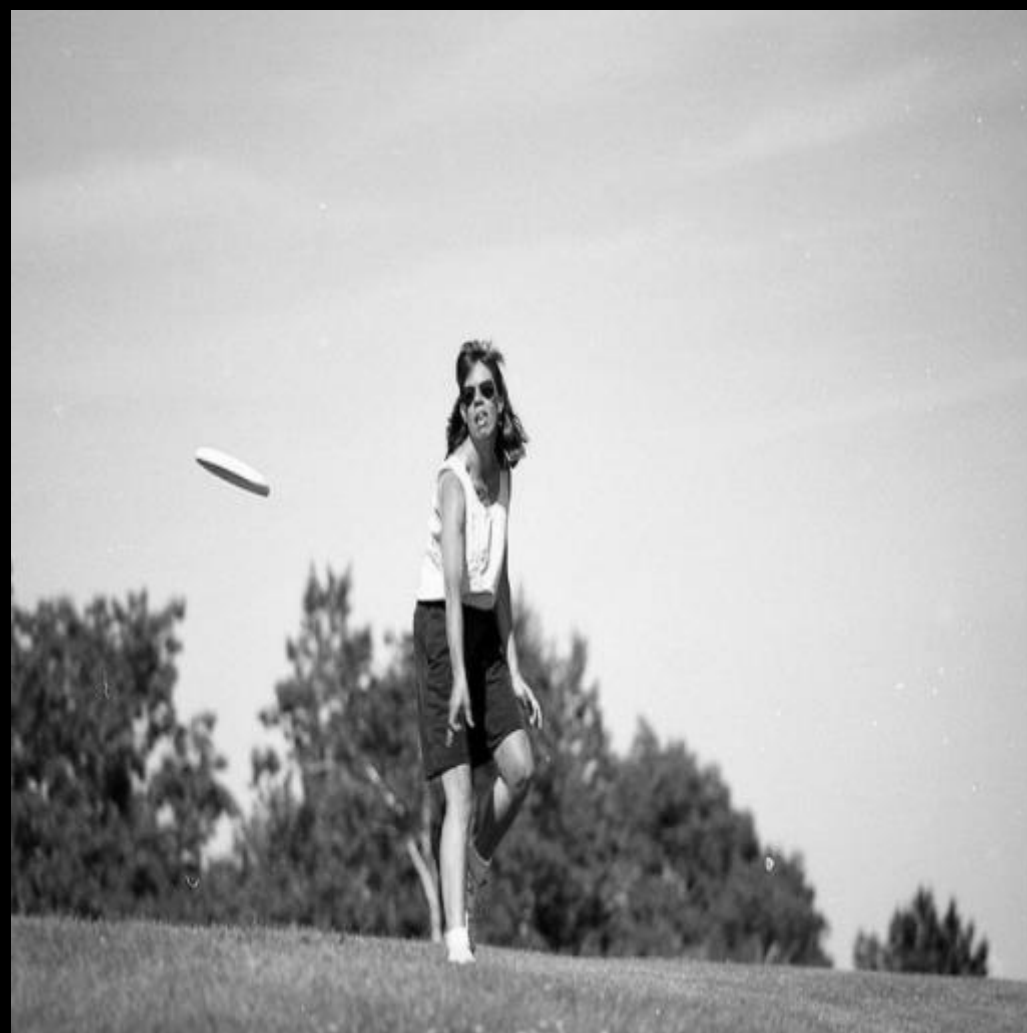

Input

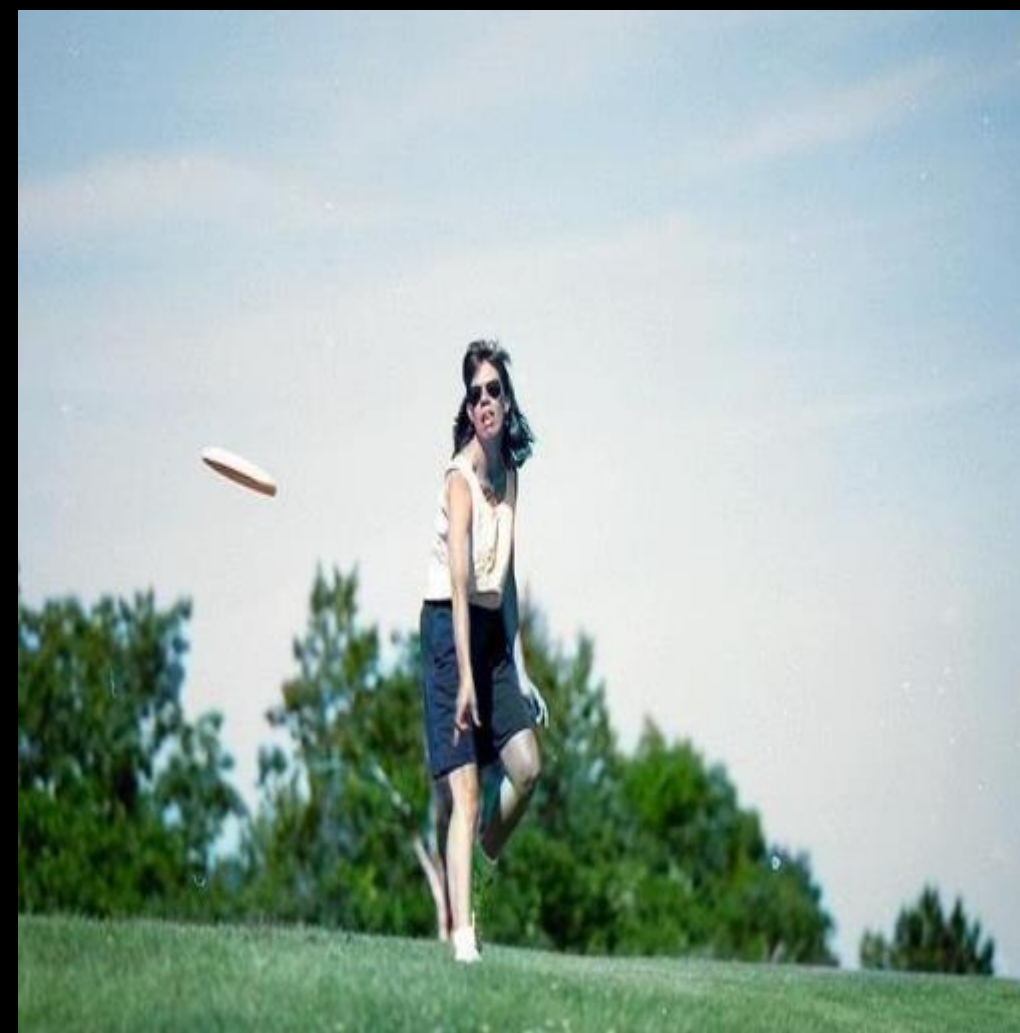

UniColor

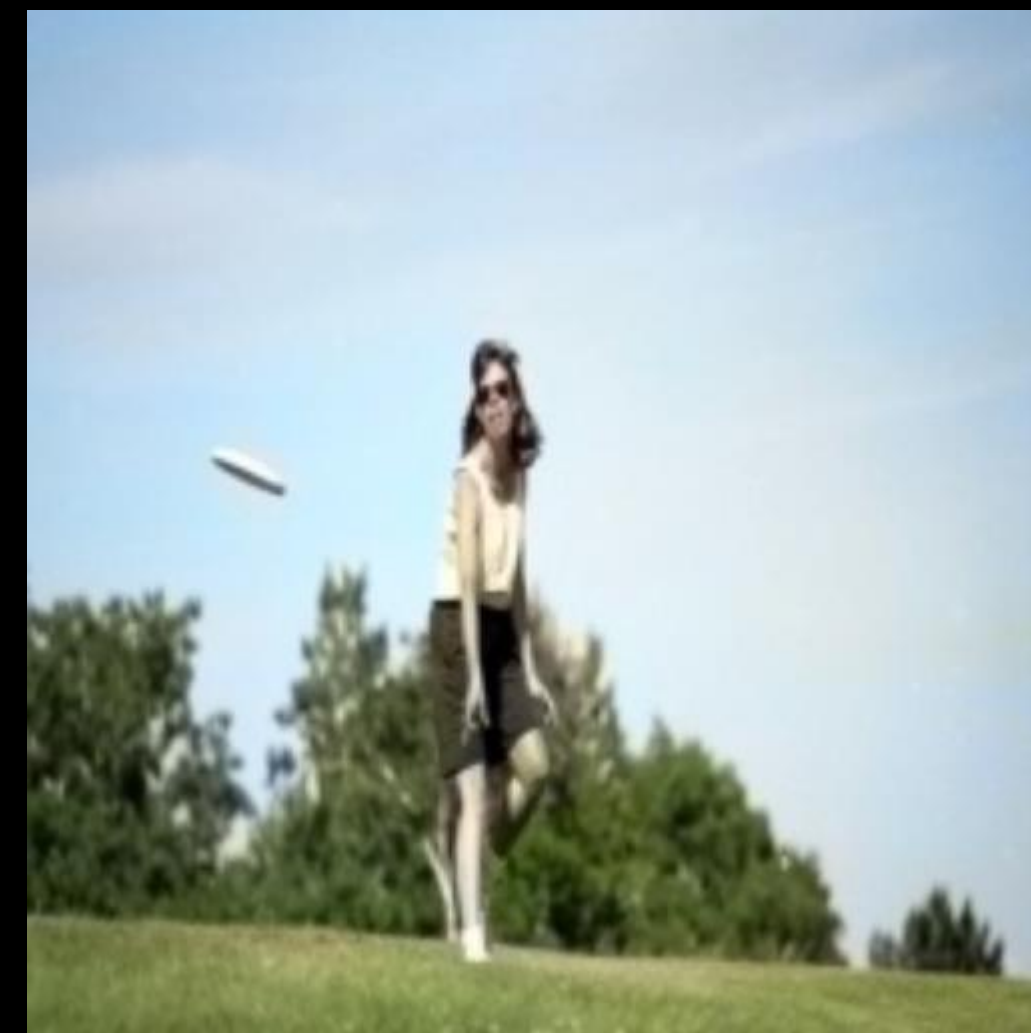

L-CoDe

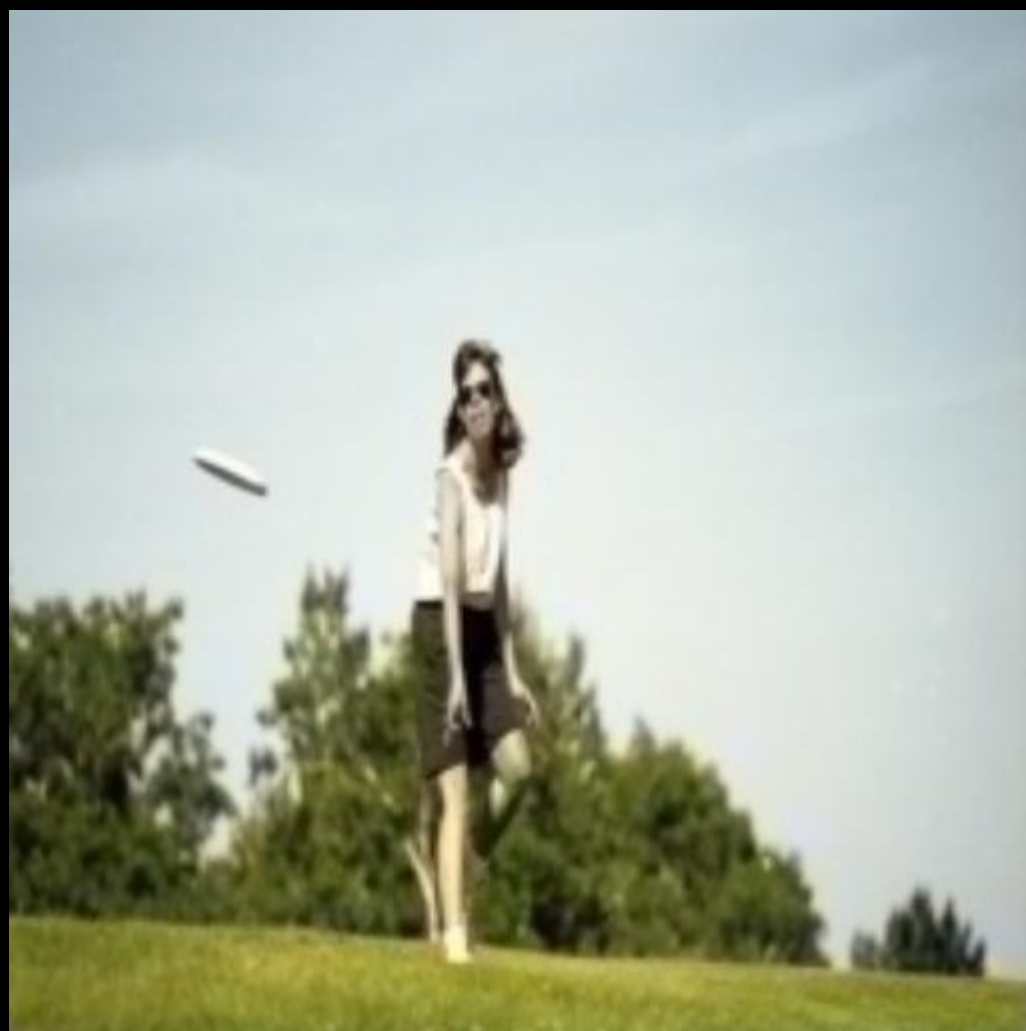

L-CoDer

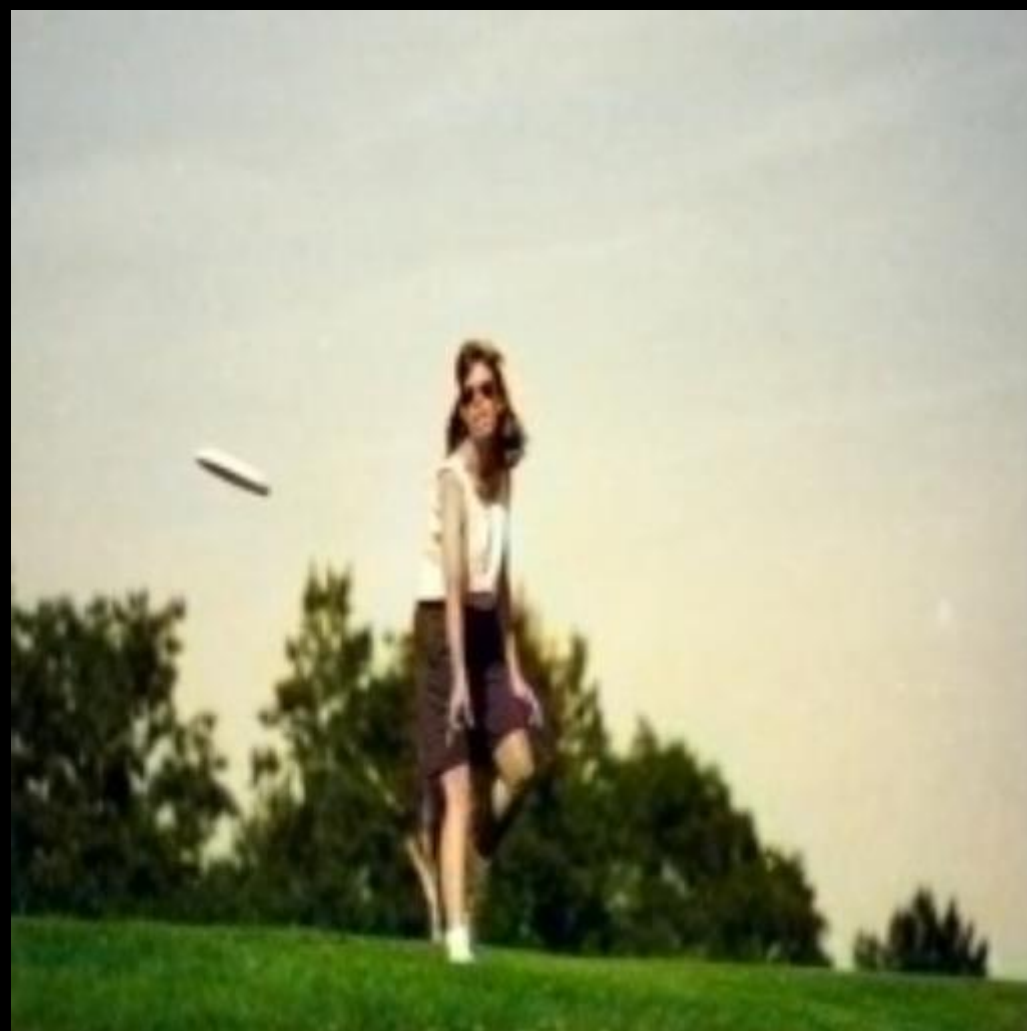

L-CoIns

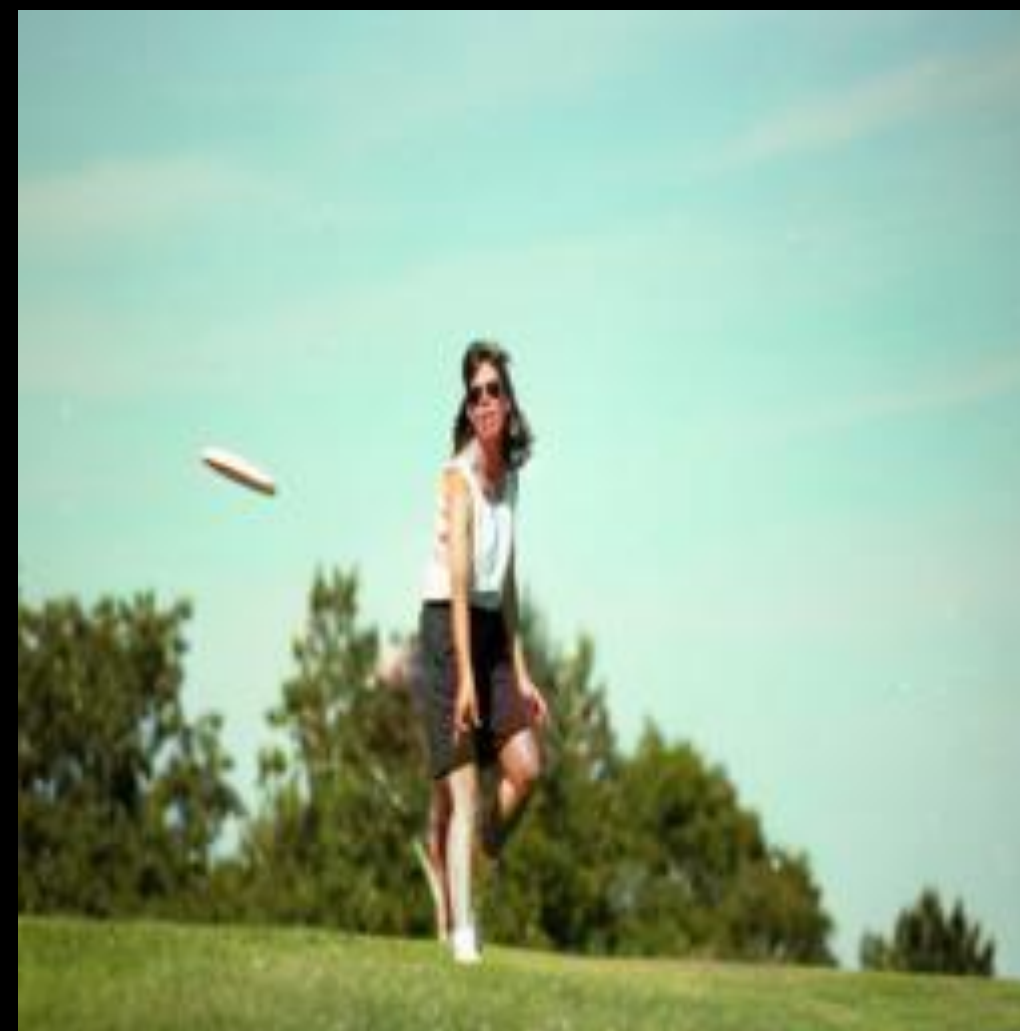

L-CAD

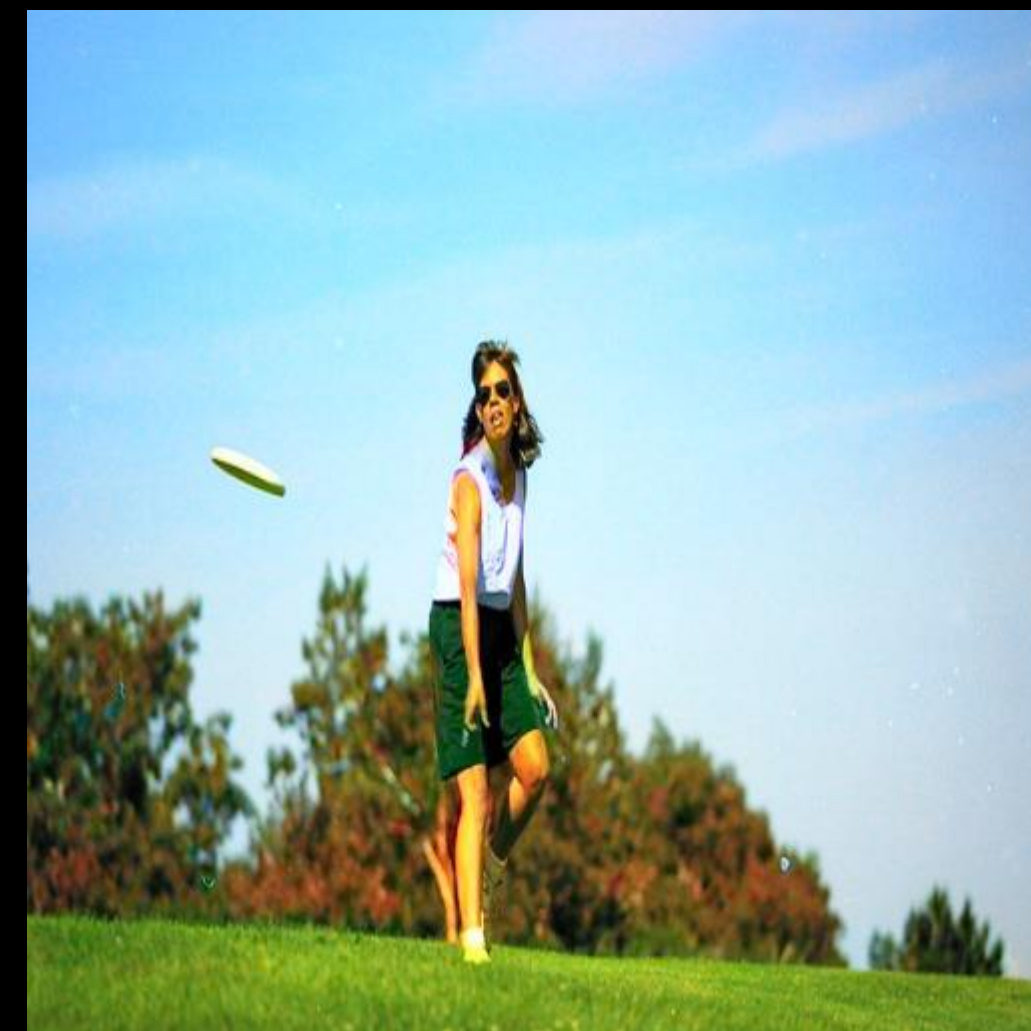

Ours



a **red** living room  
filled with furniture  
and two windows

description

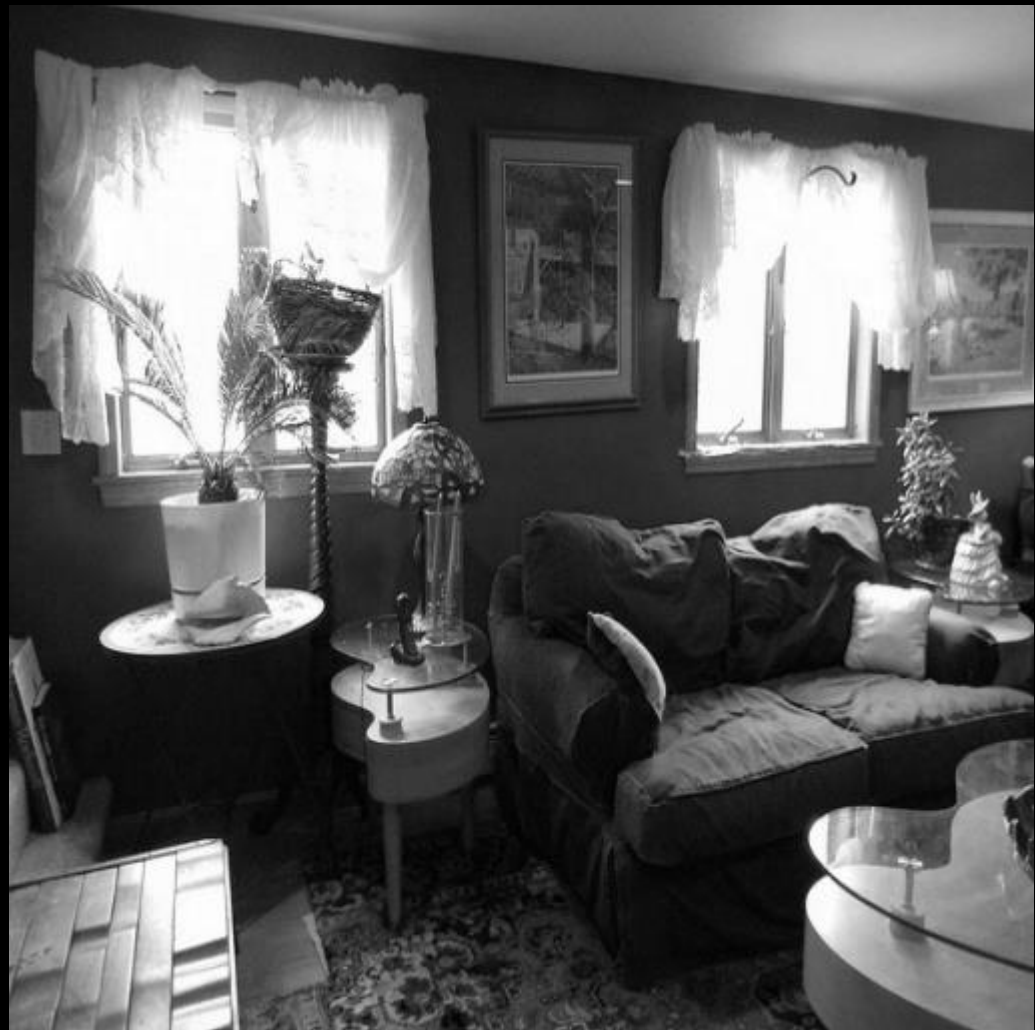

Input

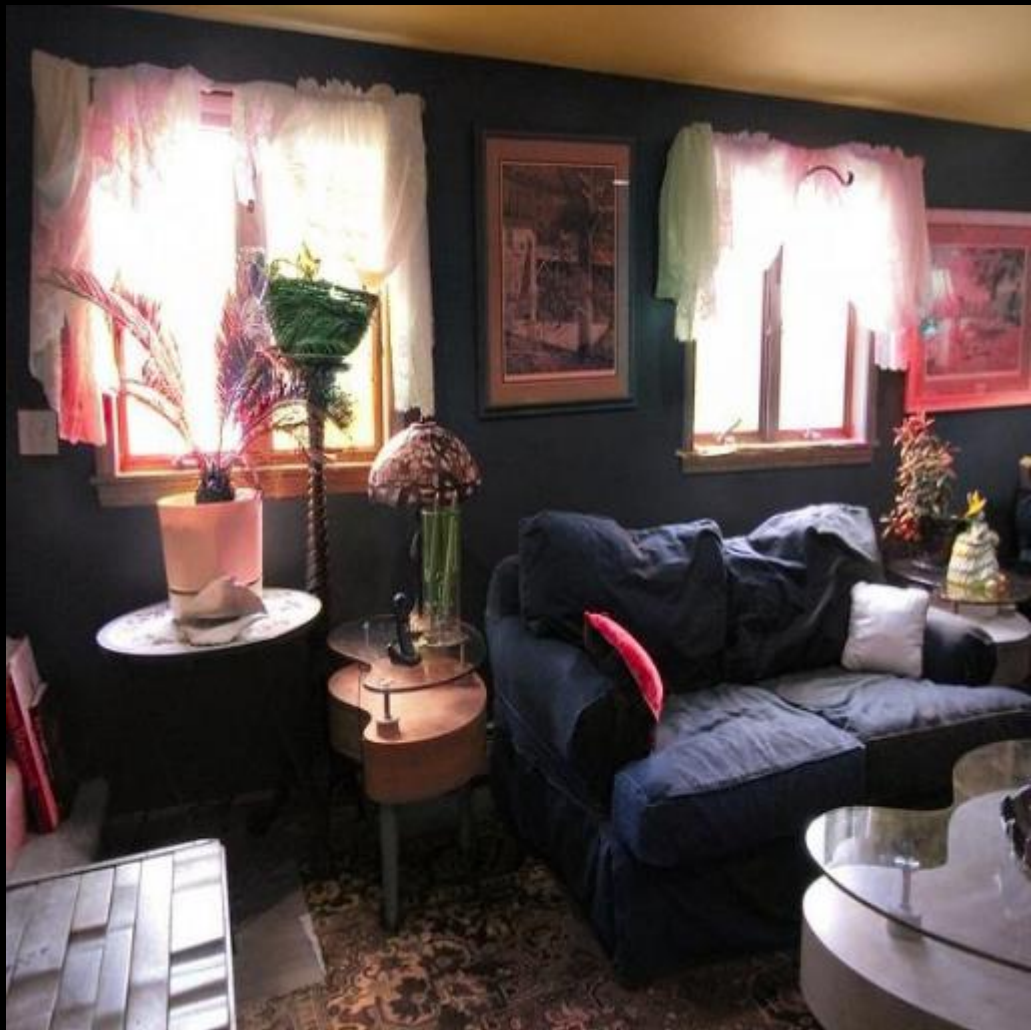

UniColor

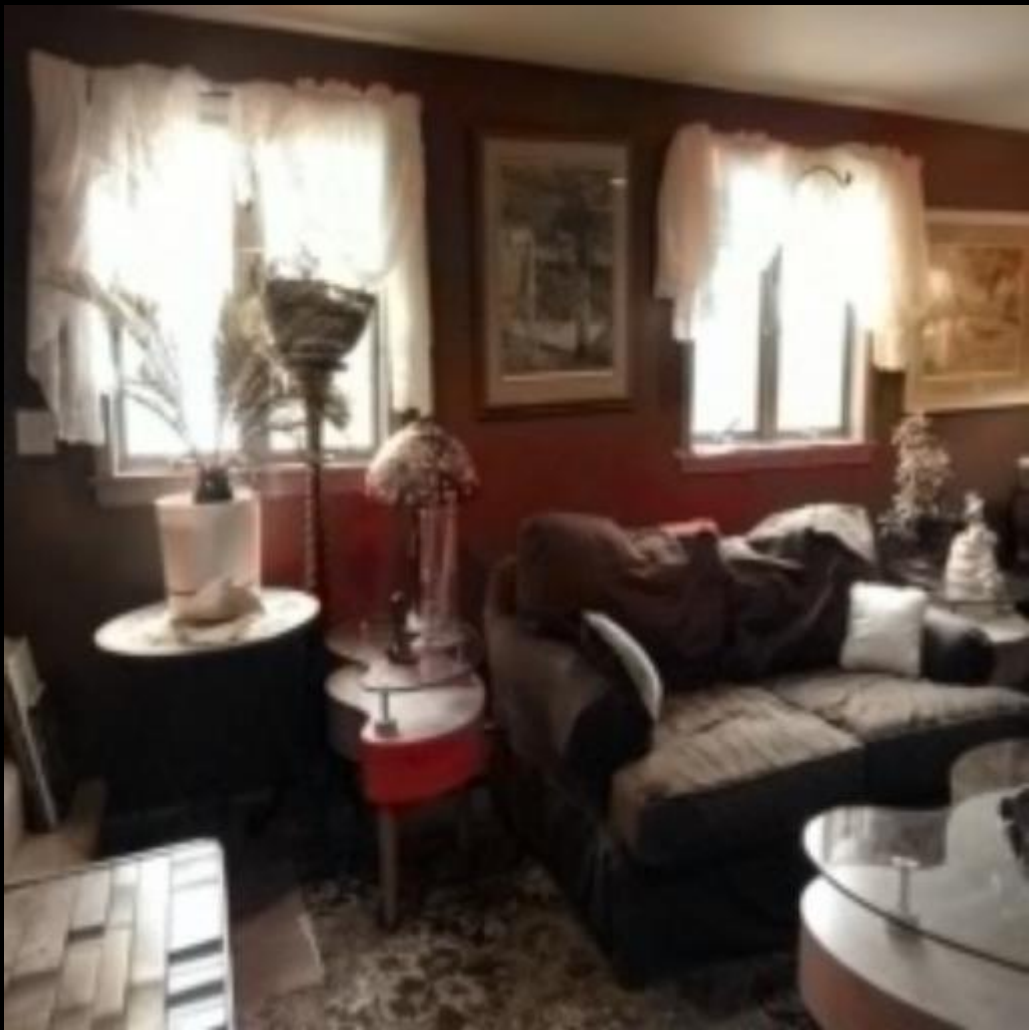

L-CoDe

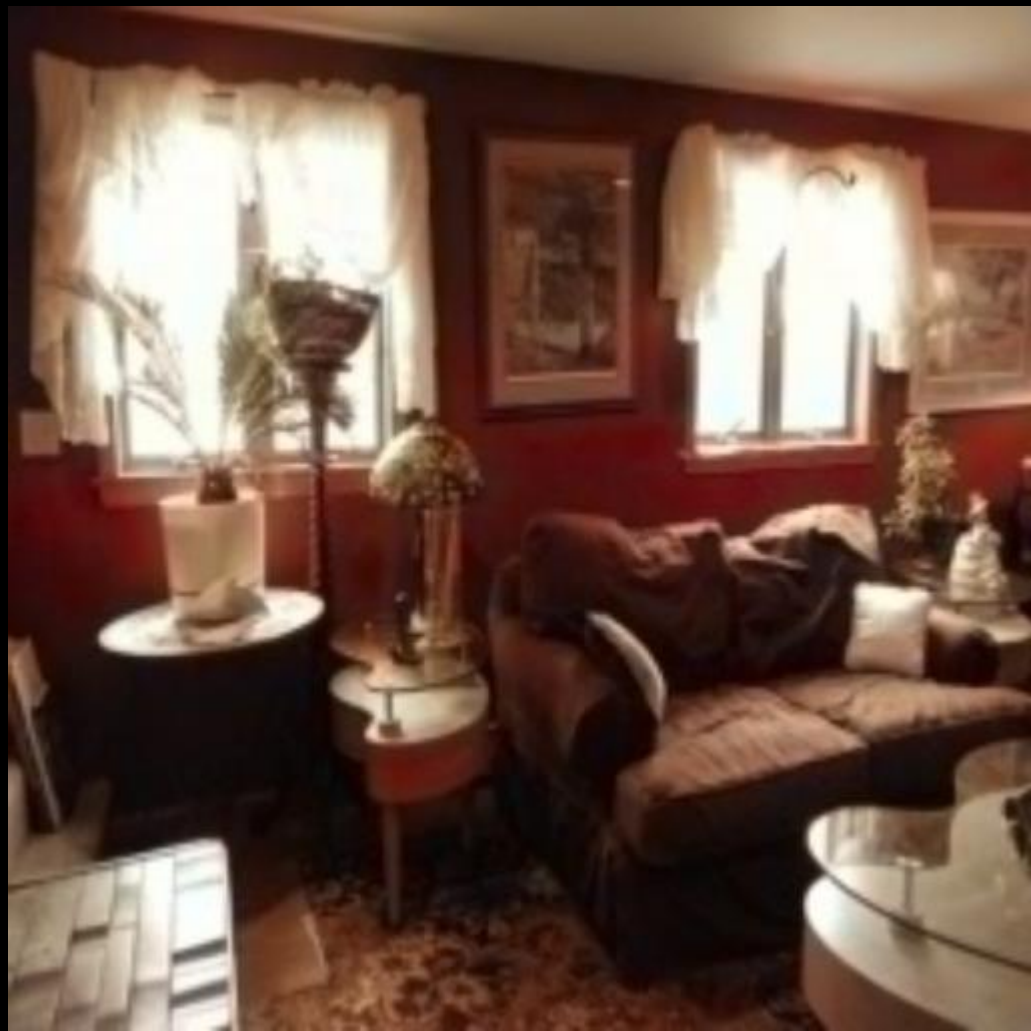

L-CoDer

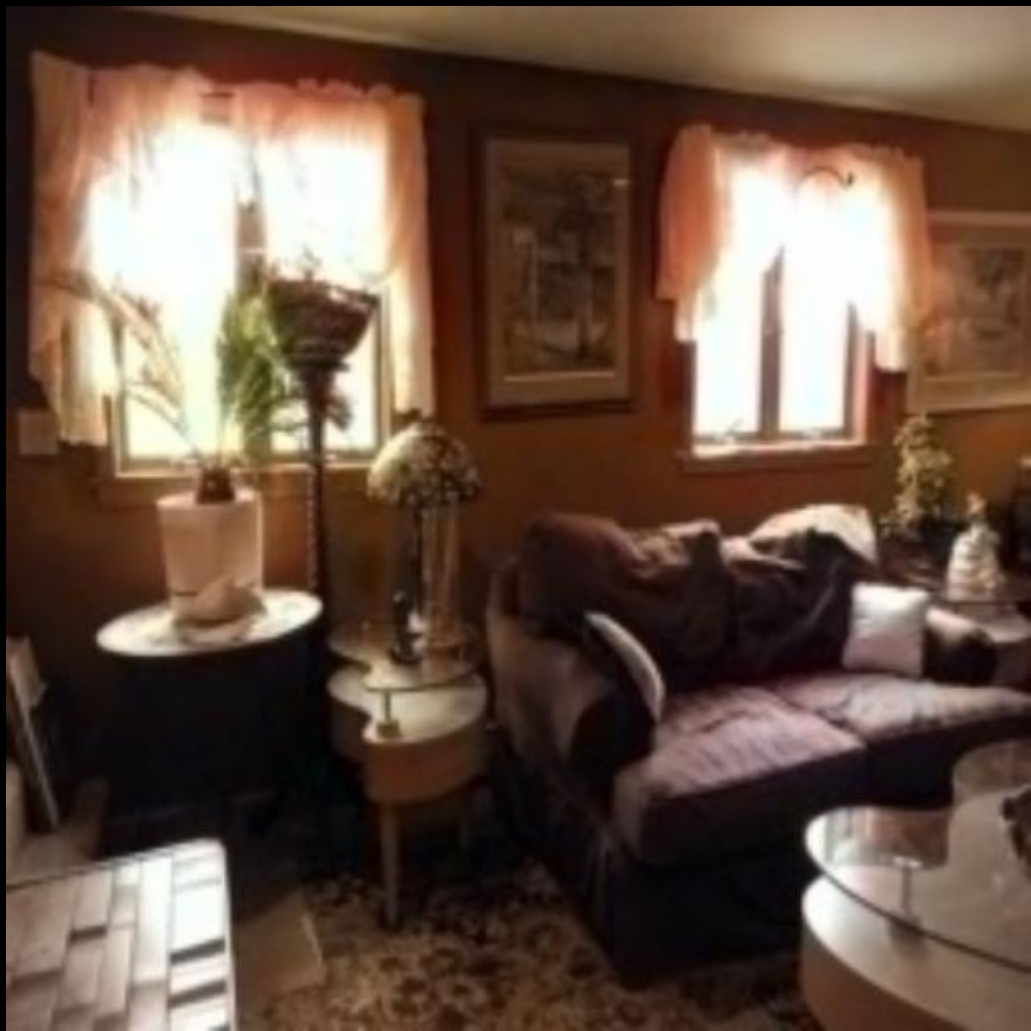

L-CoIns

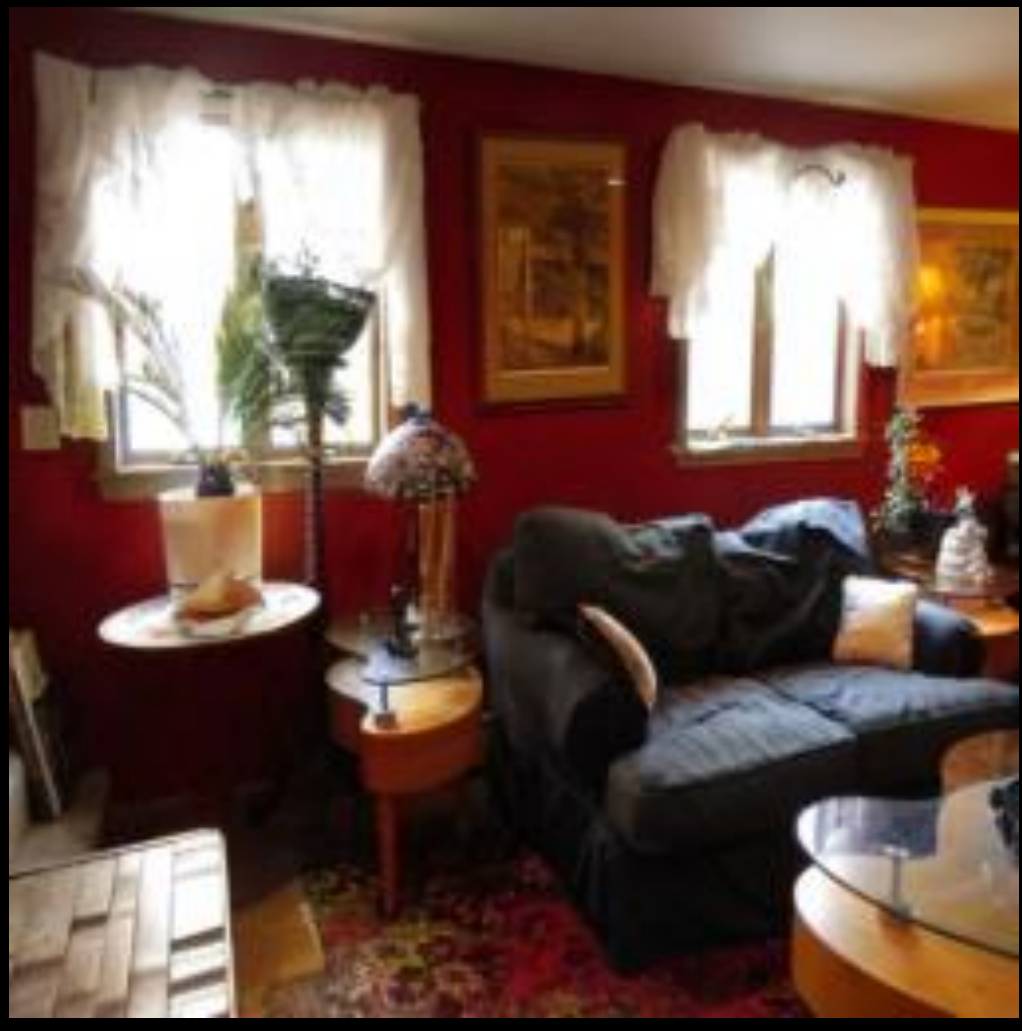

L-CAD

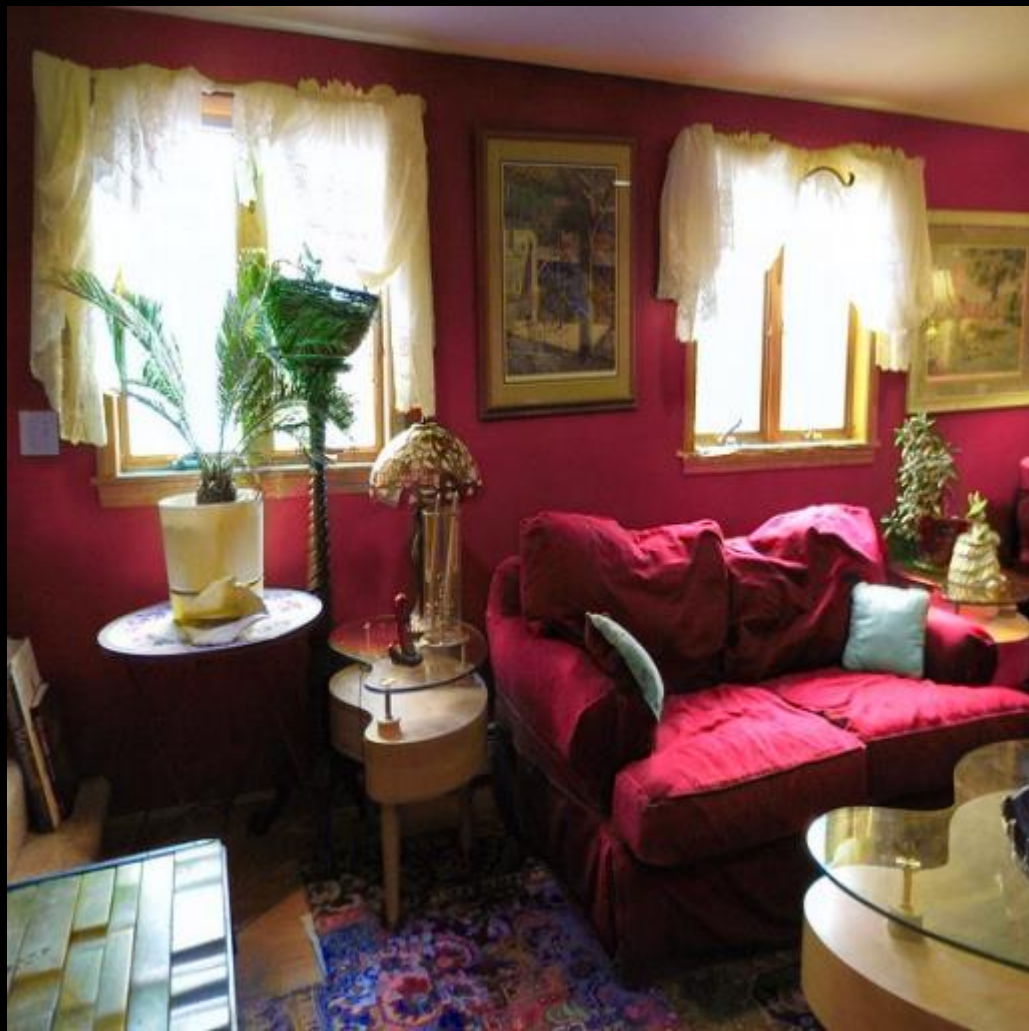

Ours



a smiling woman  
snow skier is  
dressed in purple

description

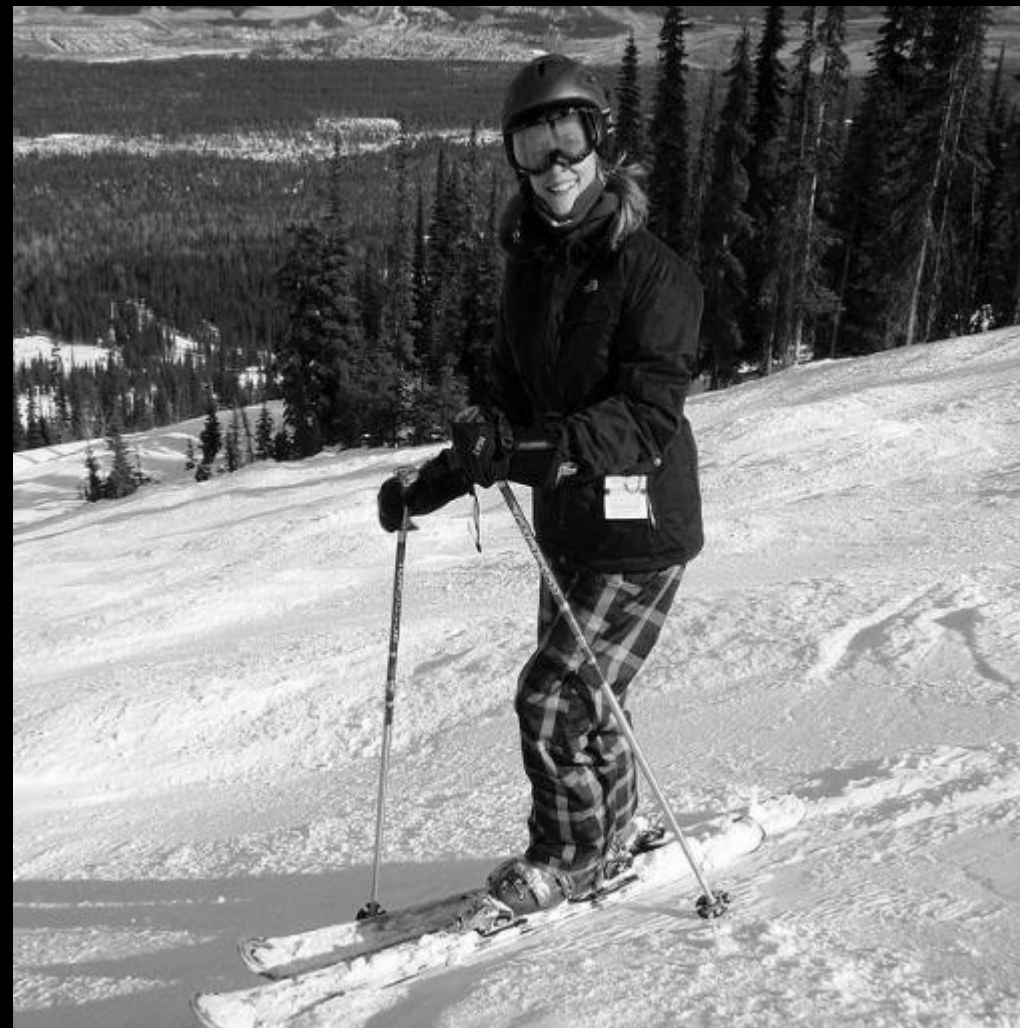

Input

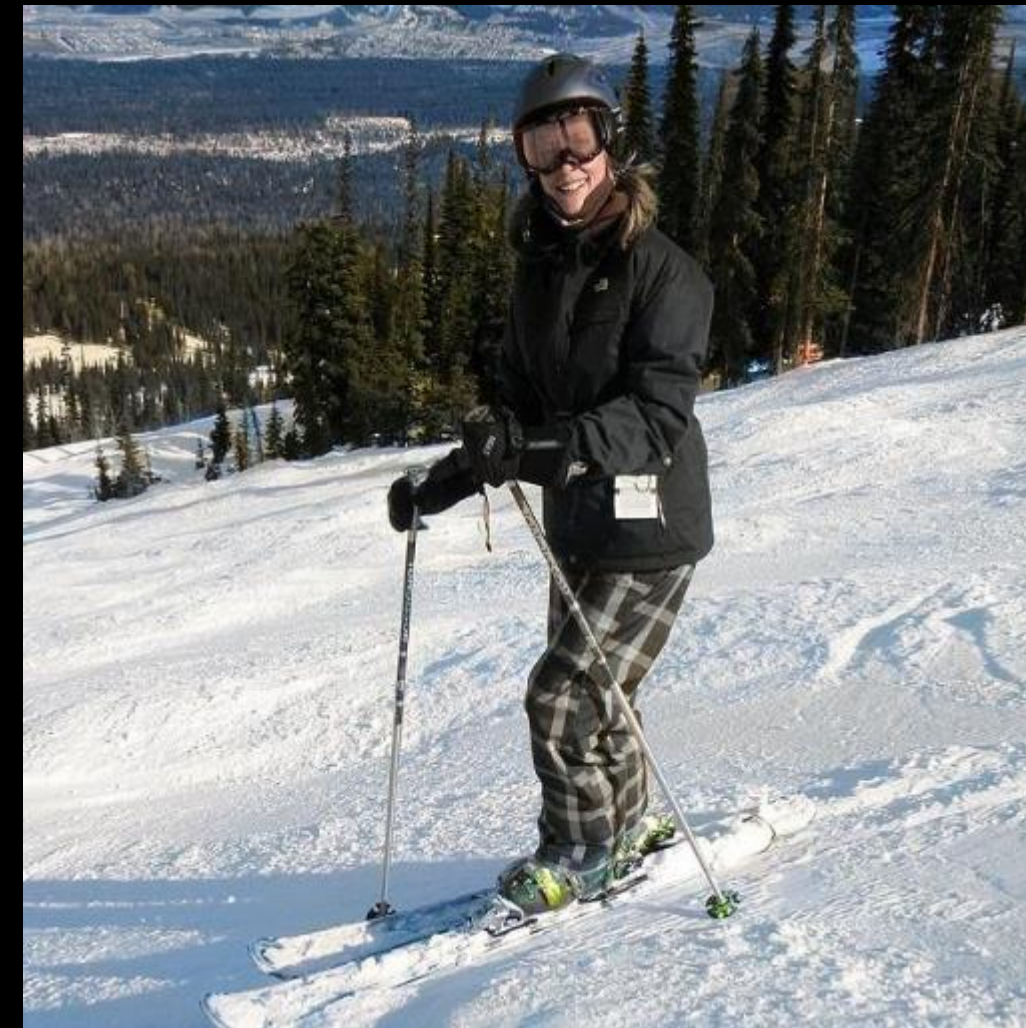

UniColor

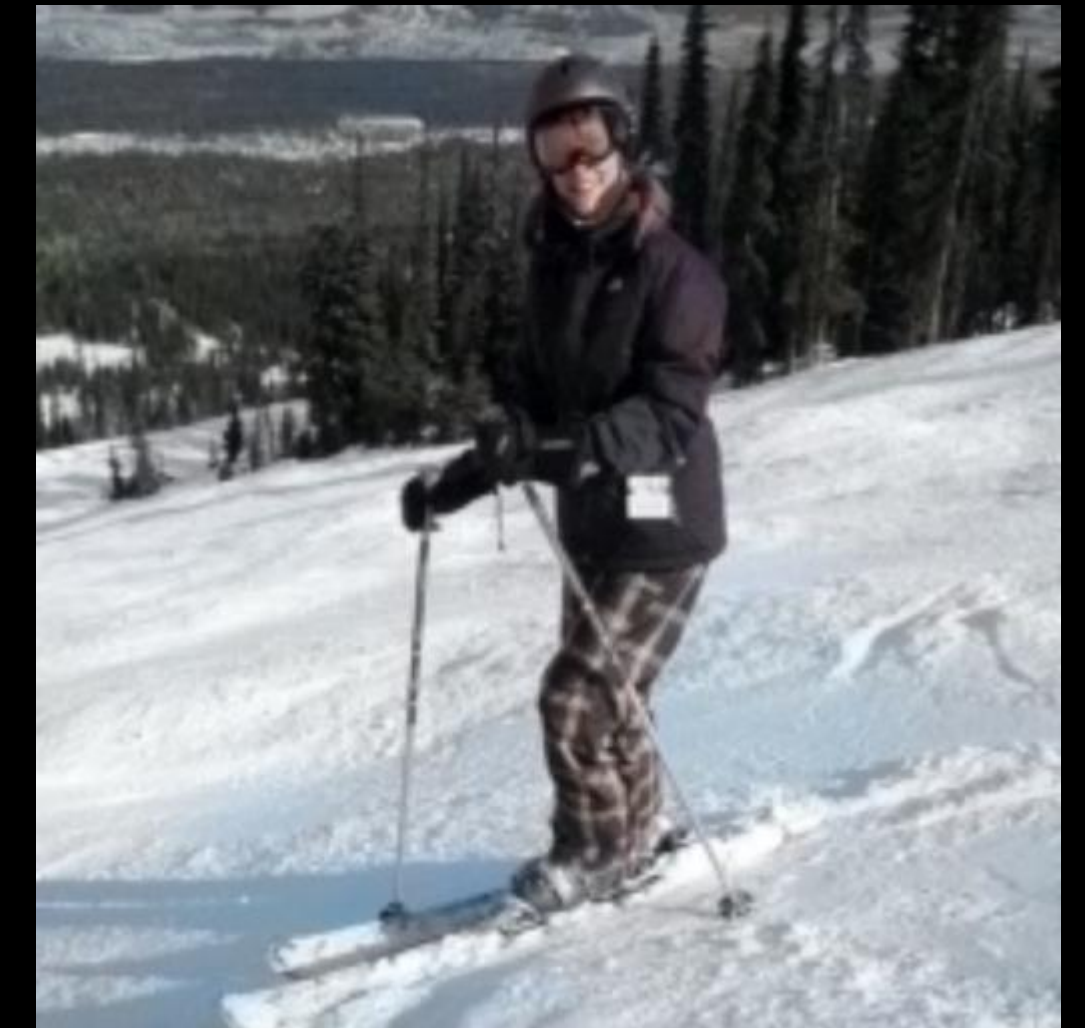

L-CoDe

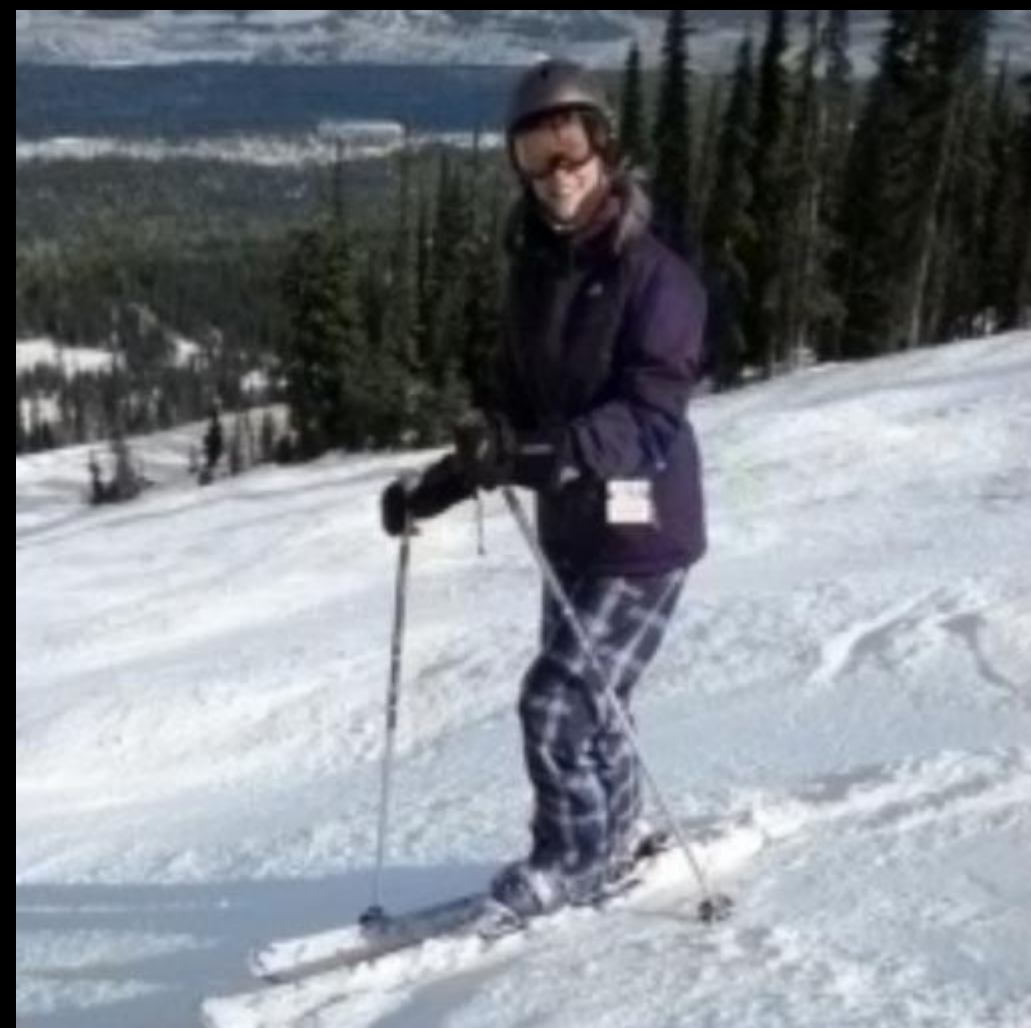

L-CoDer

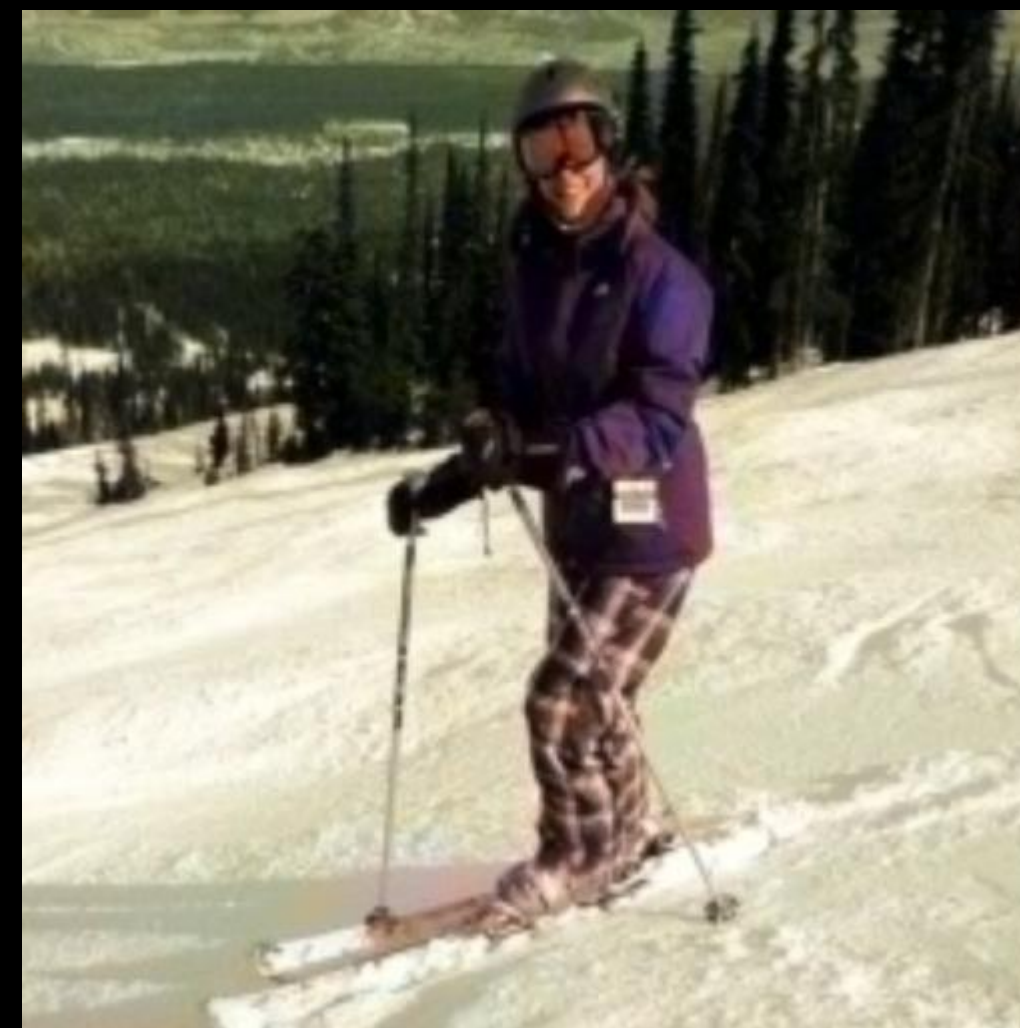

L-CoIns

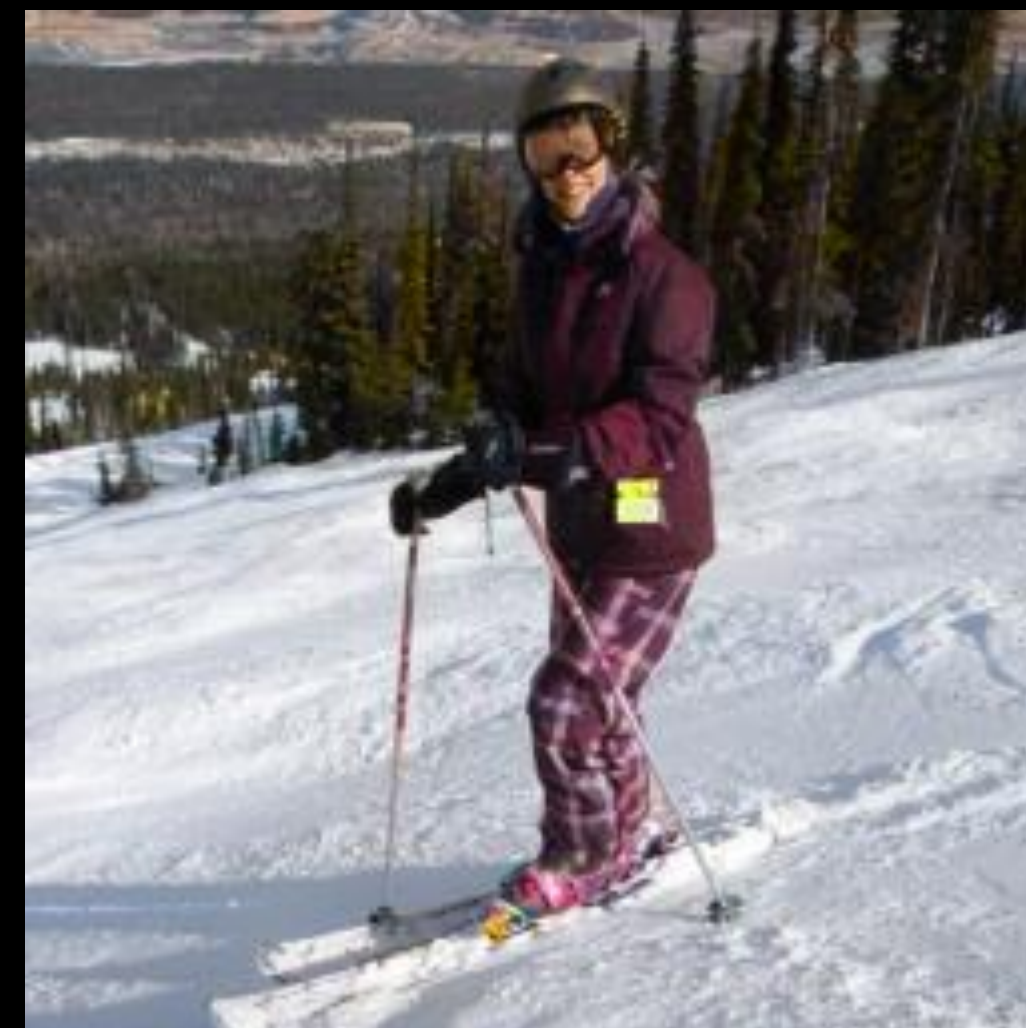

L-CAD

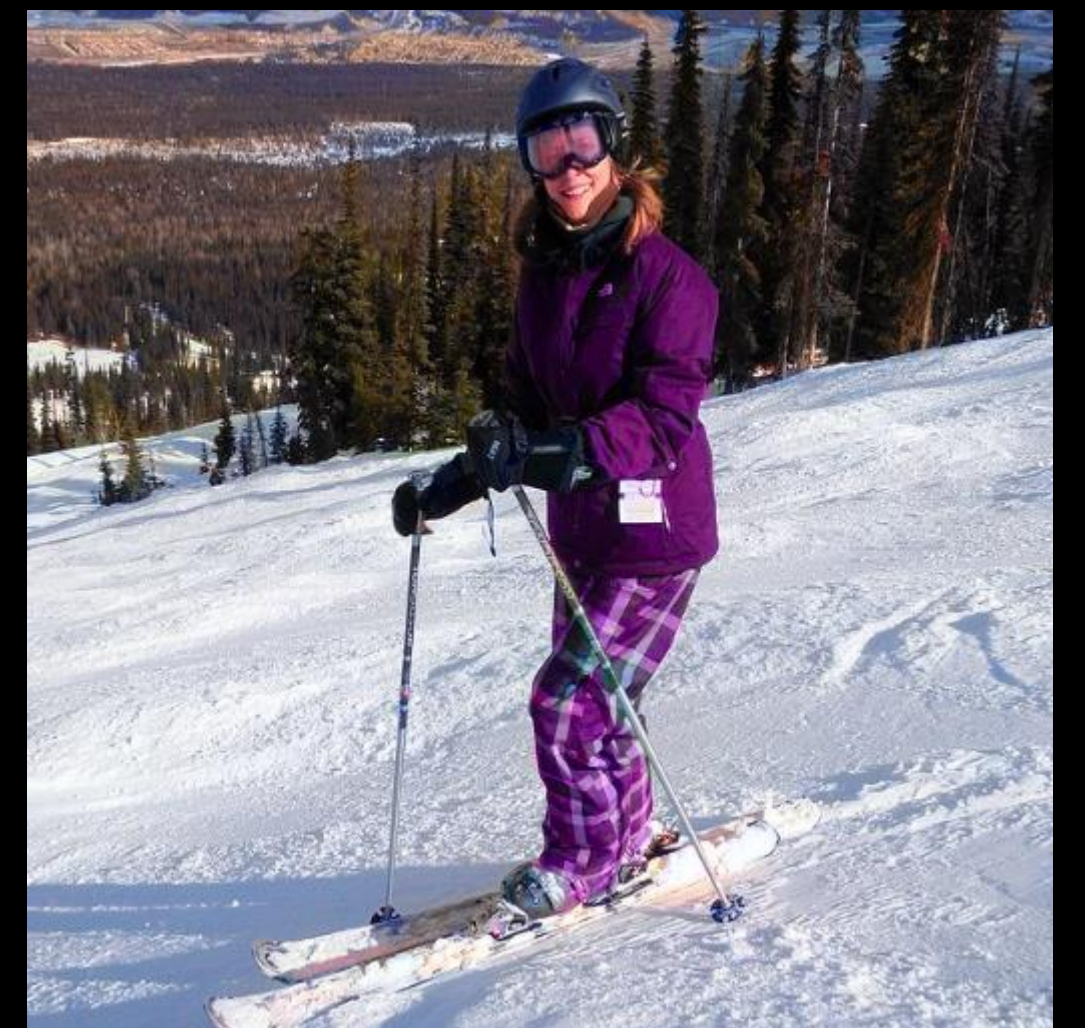

Ours



a bench sit in front  
of a **blue** and **yellow**  
train.

description

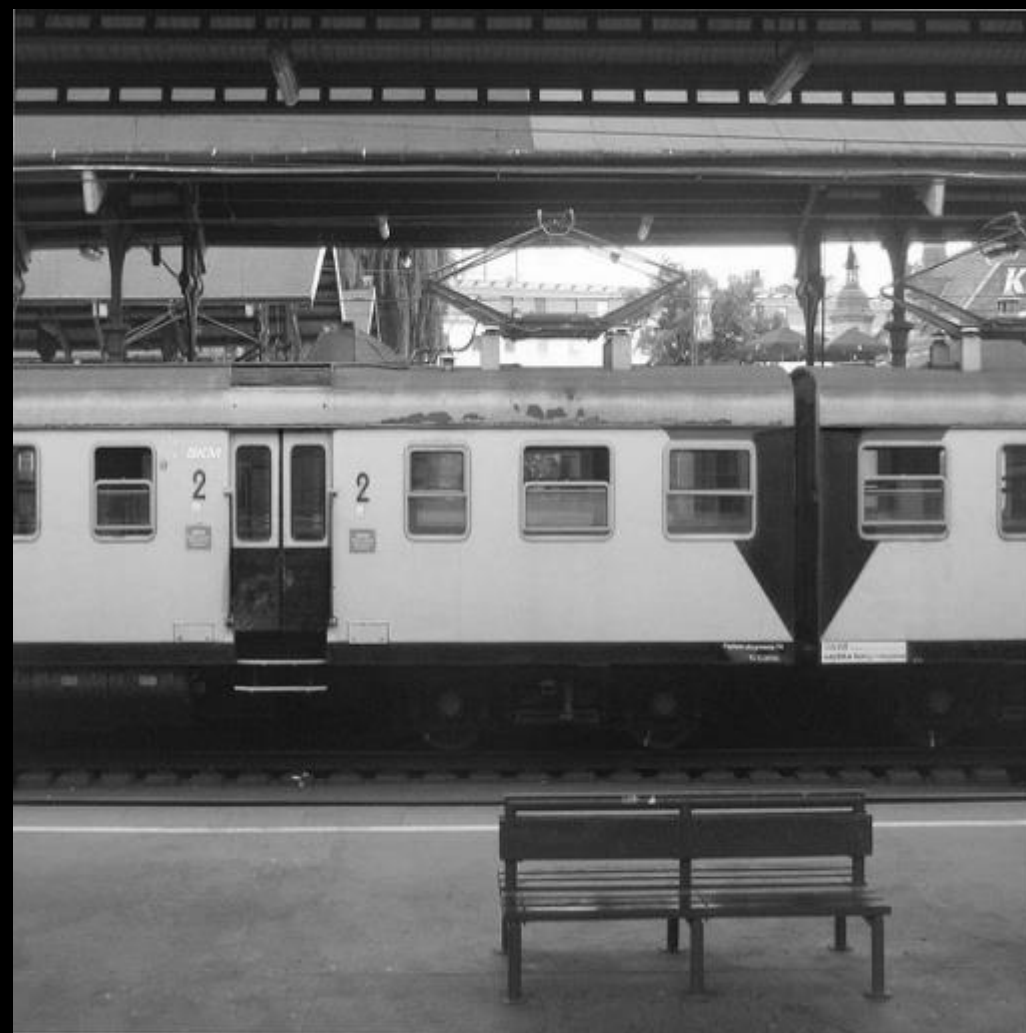

Input

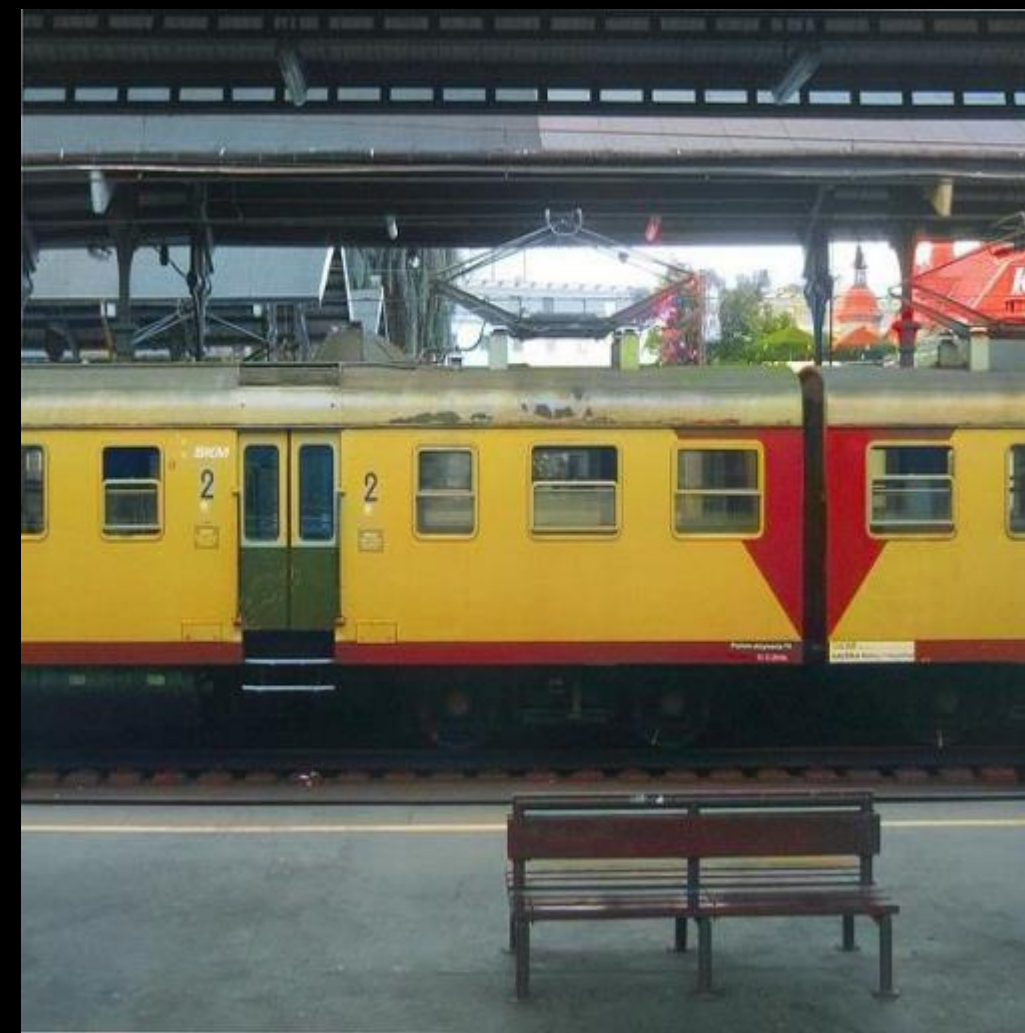

UniColor

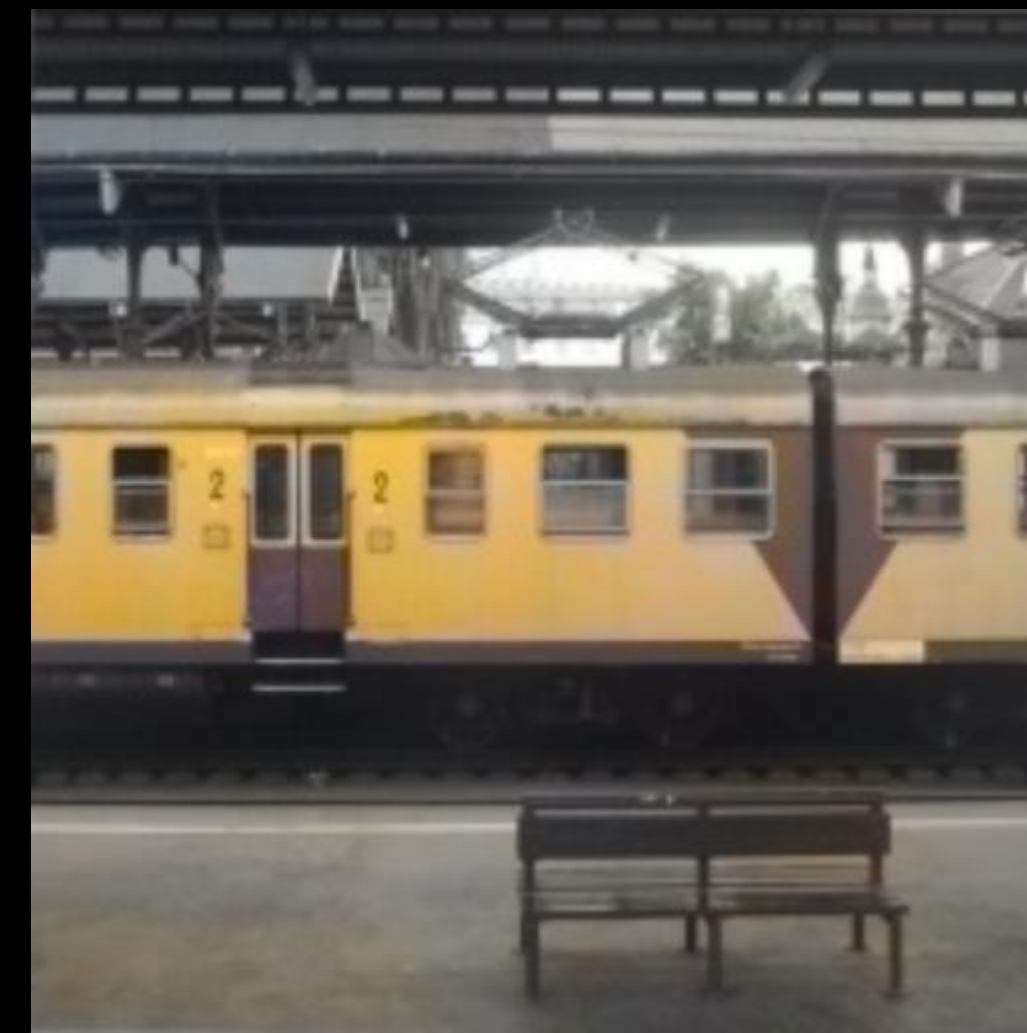

L-CoDe

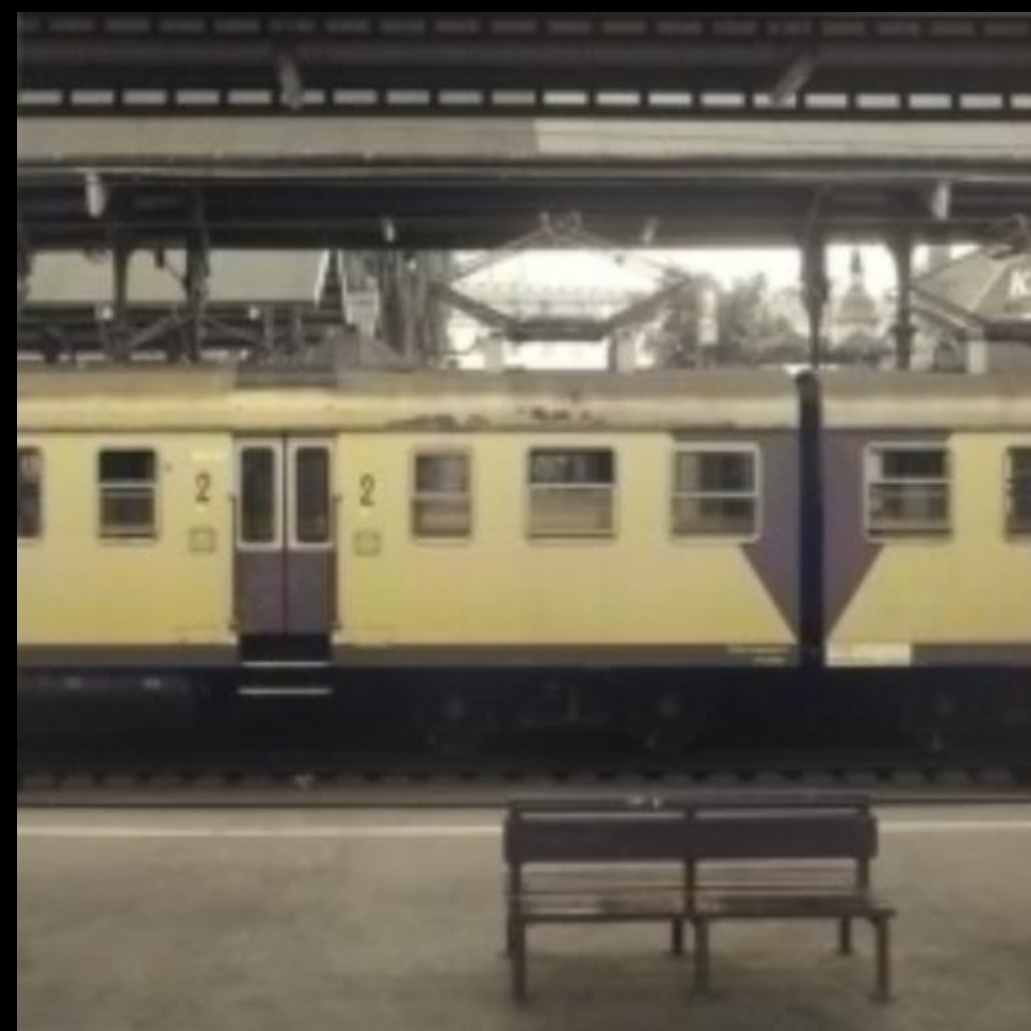

L-CoDer

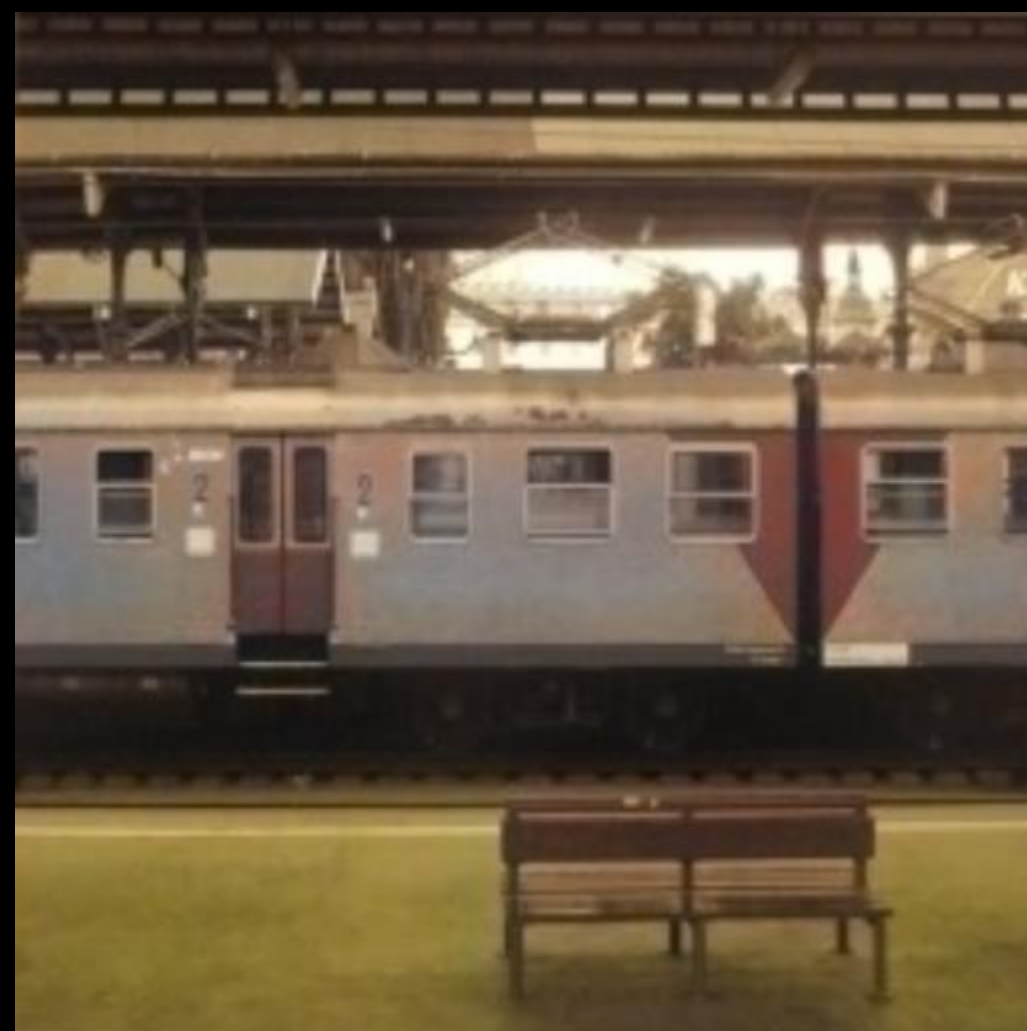

L-CoIns

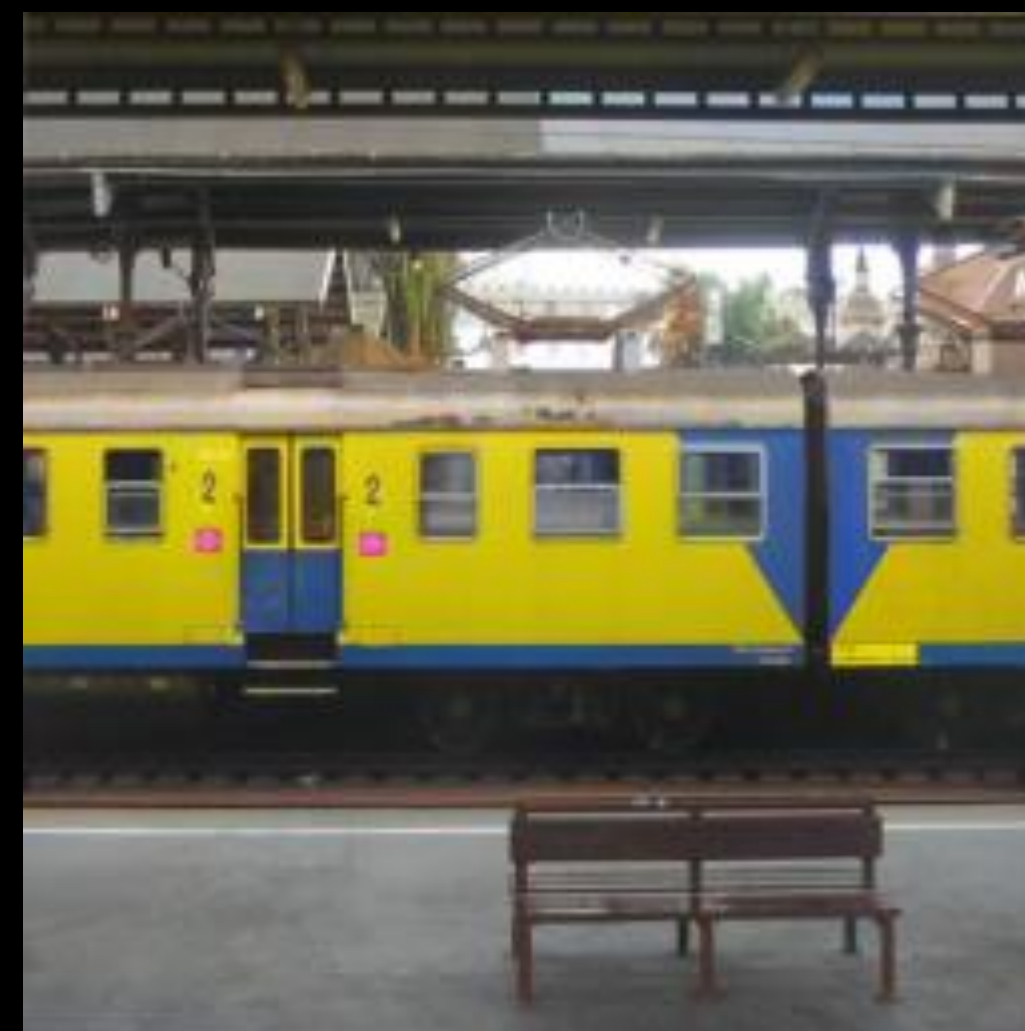

L-CAD

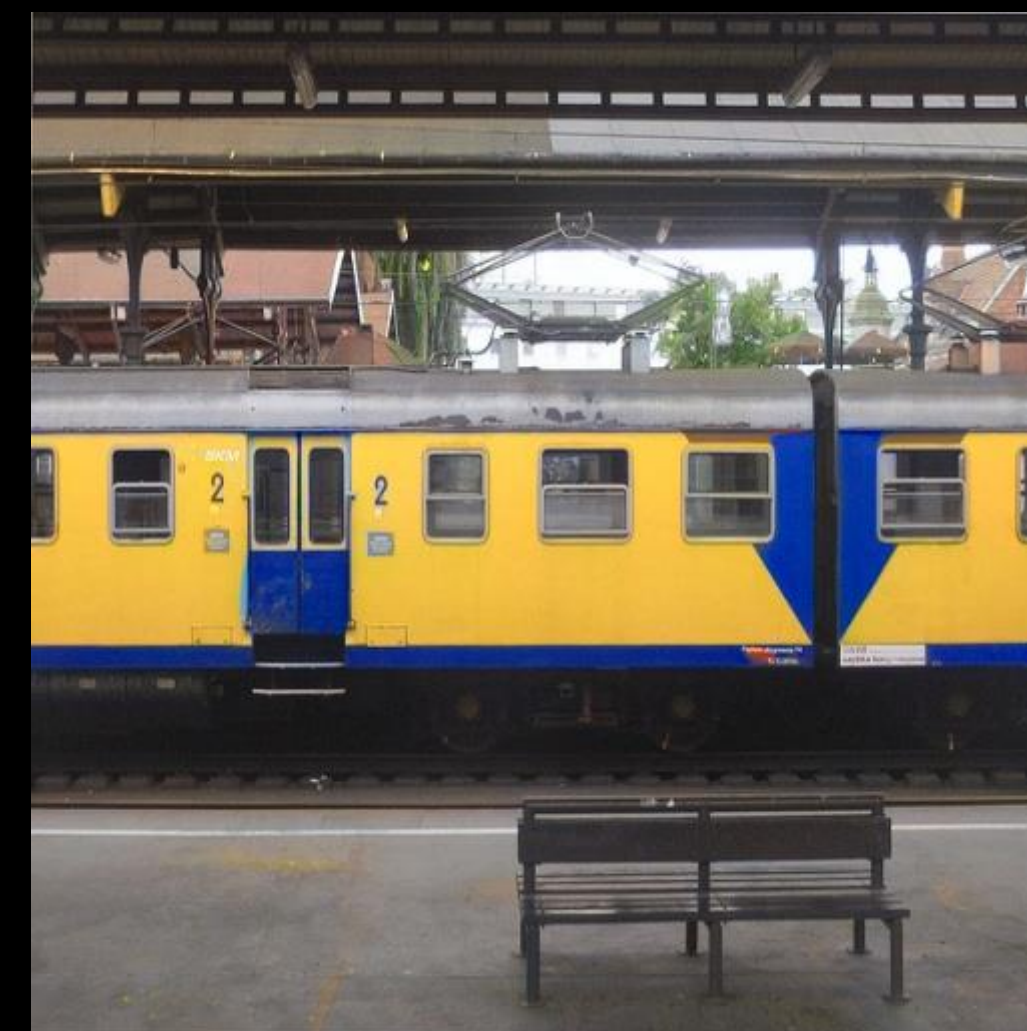

Ours



a girl in an **orange**  
sweater is sitting on  
a skateboard

description

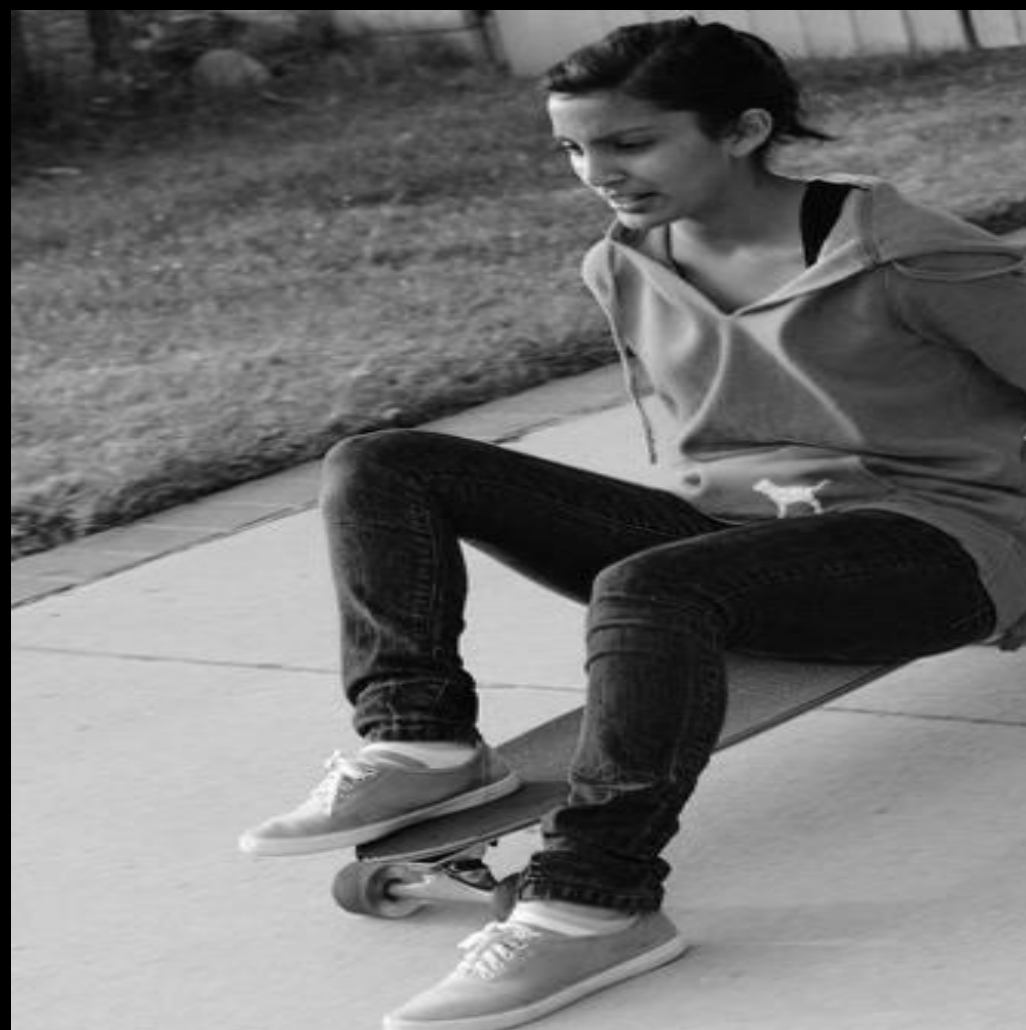

Input

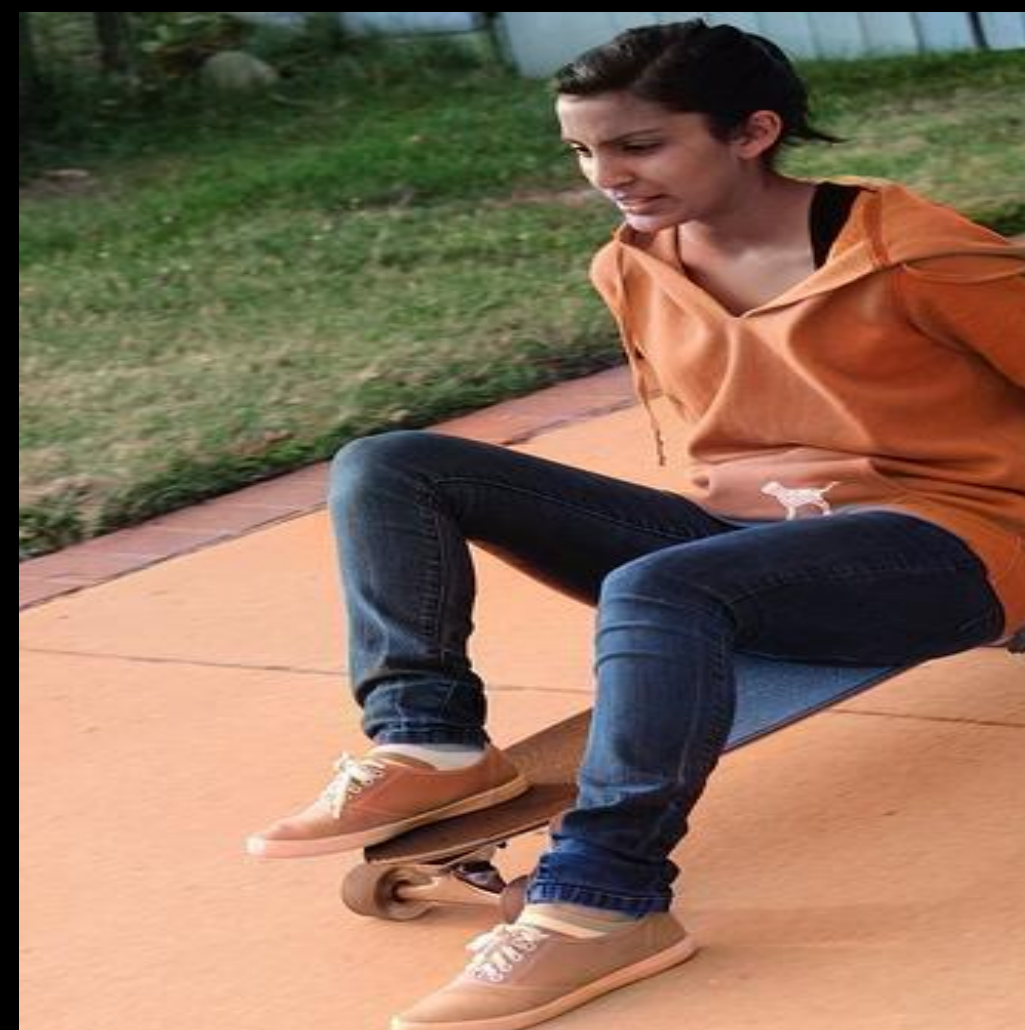

UniColor

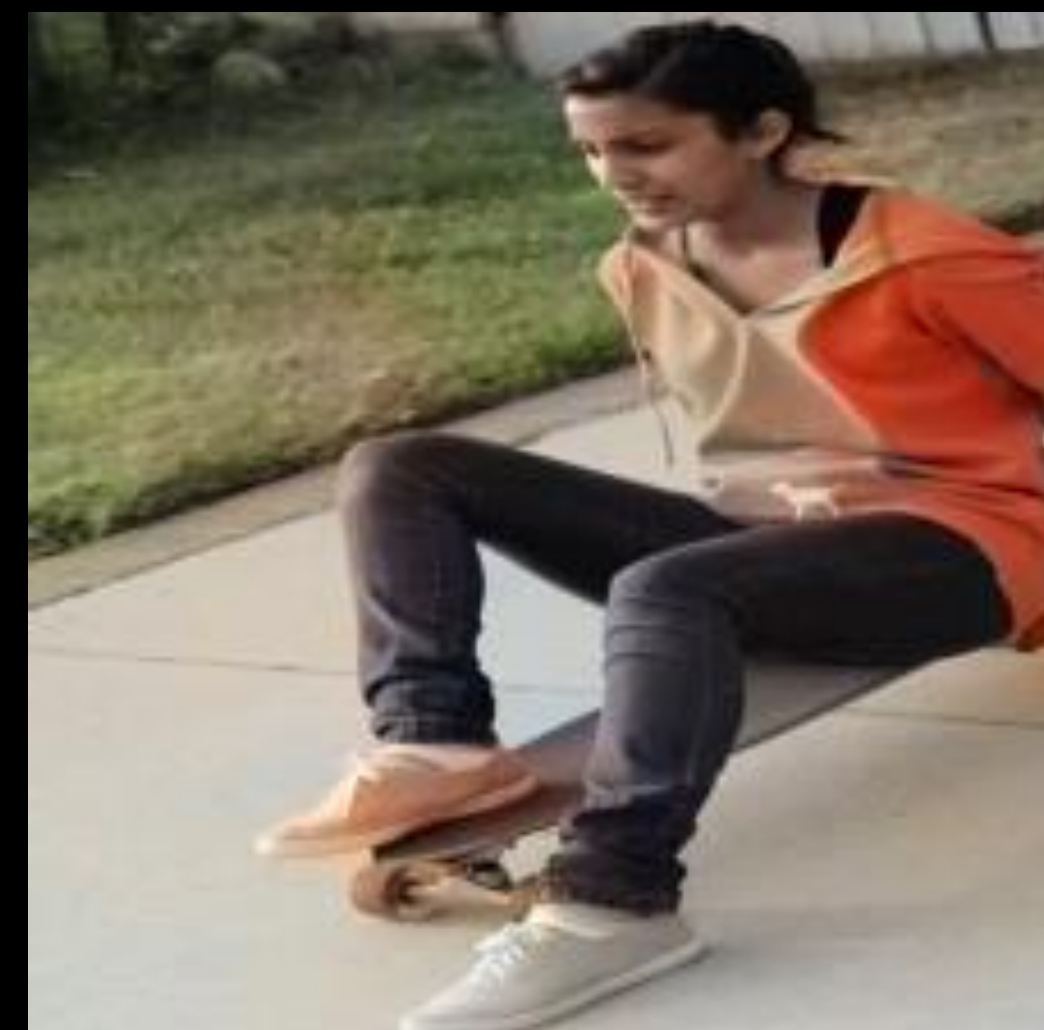

L-CoDe

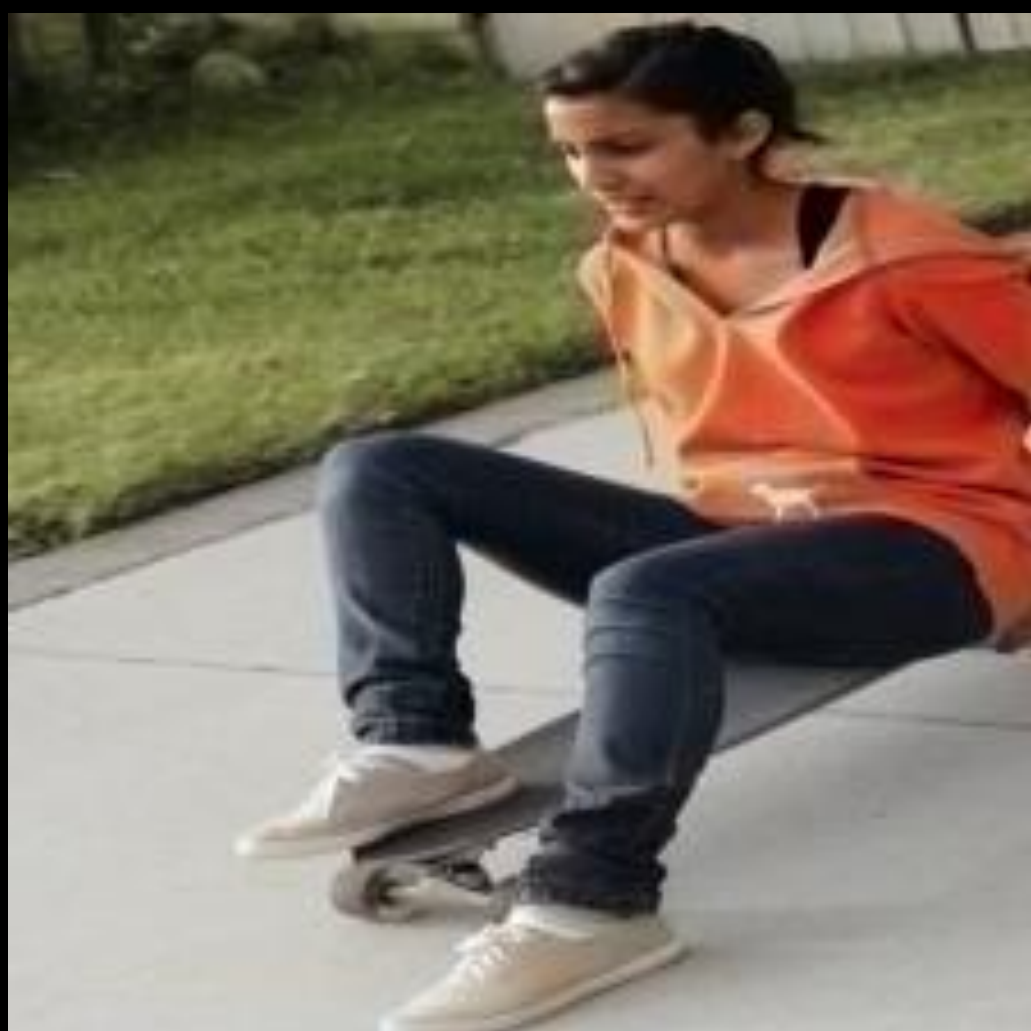

L-CoDer

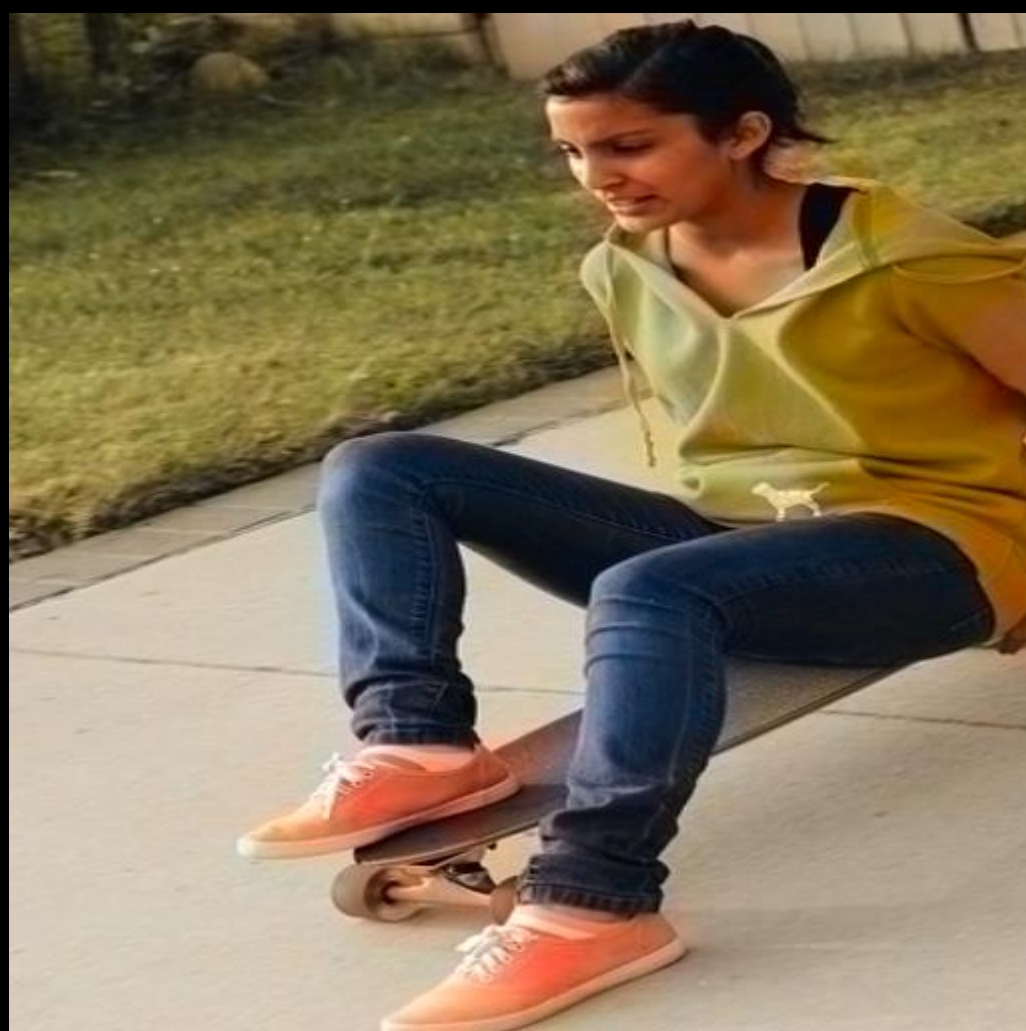

L-CoIns

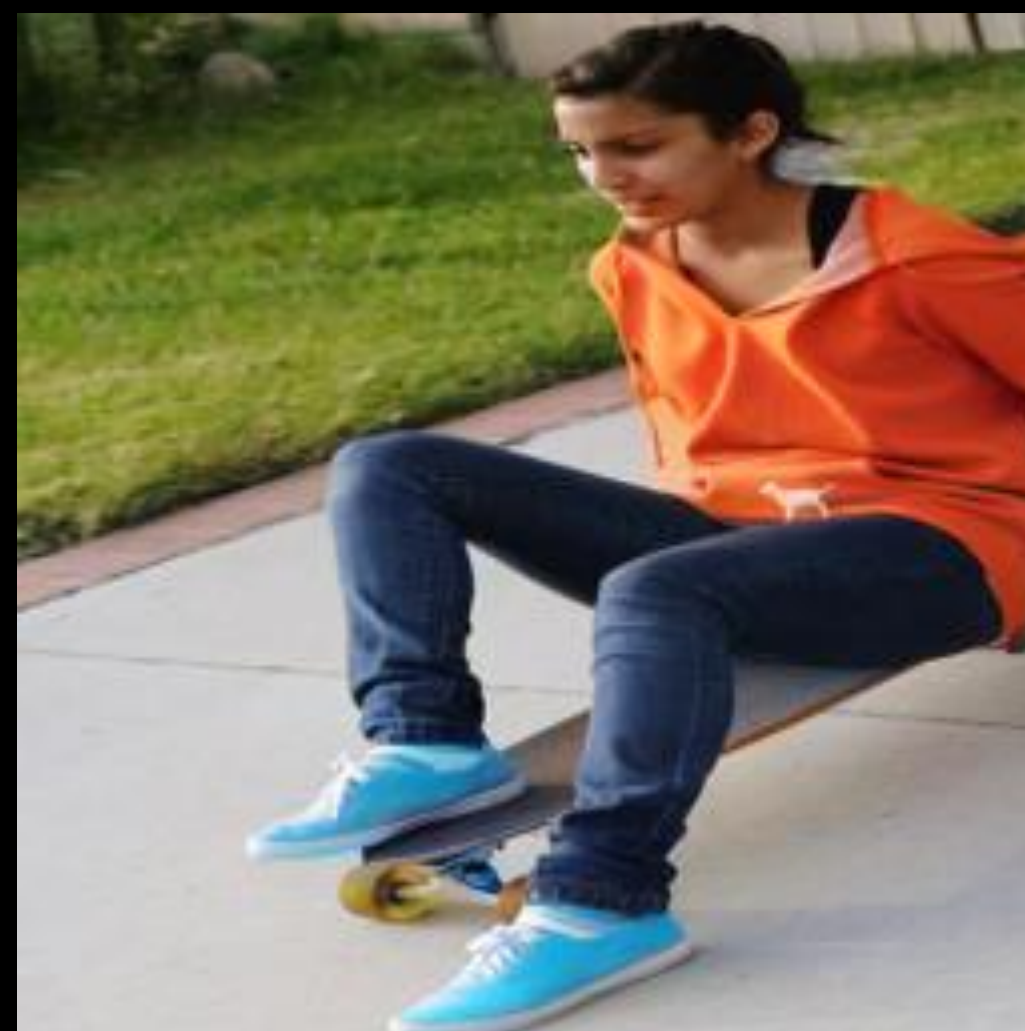

L-CAD

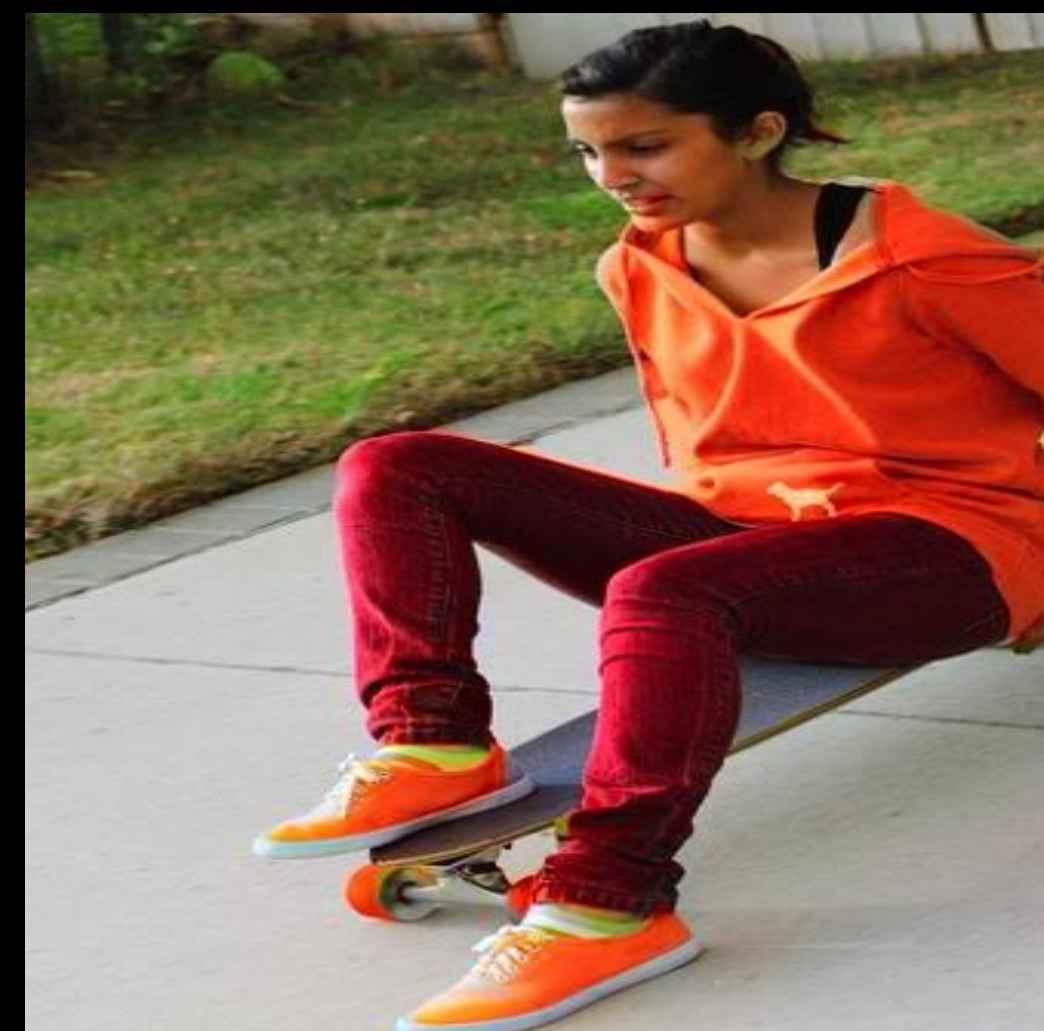

Ours



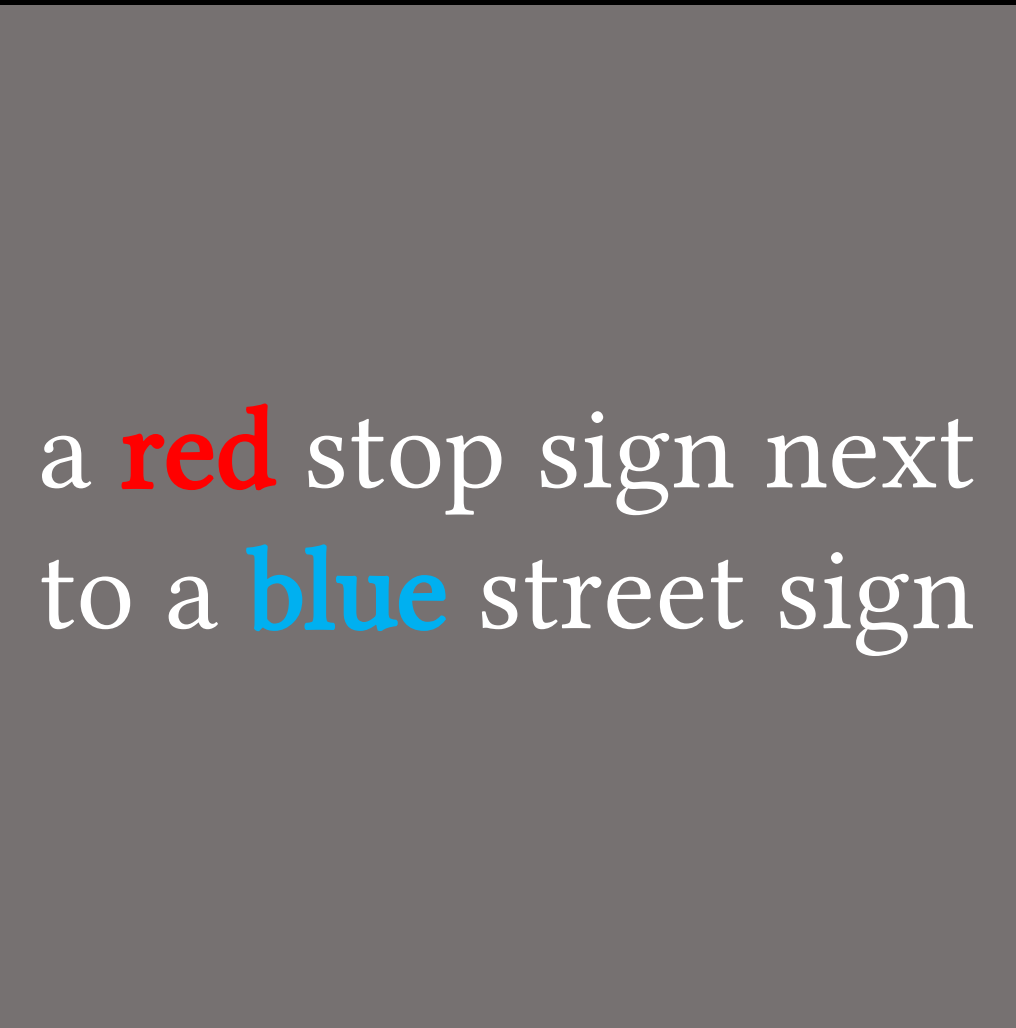

description

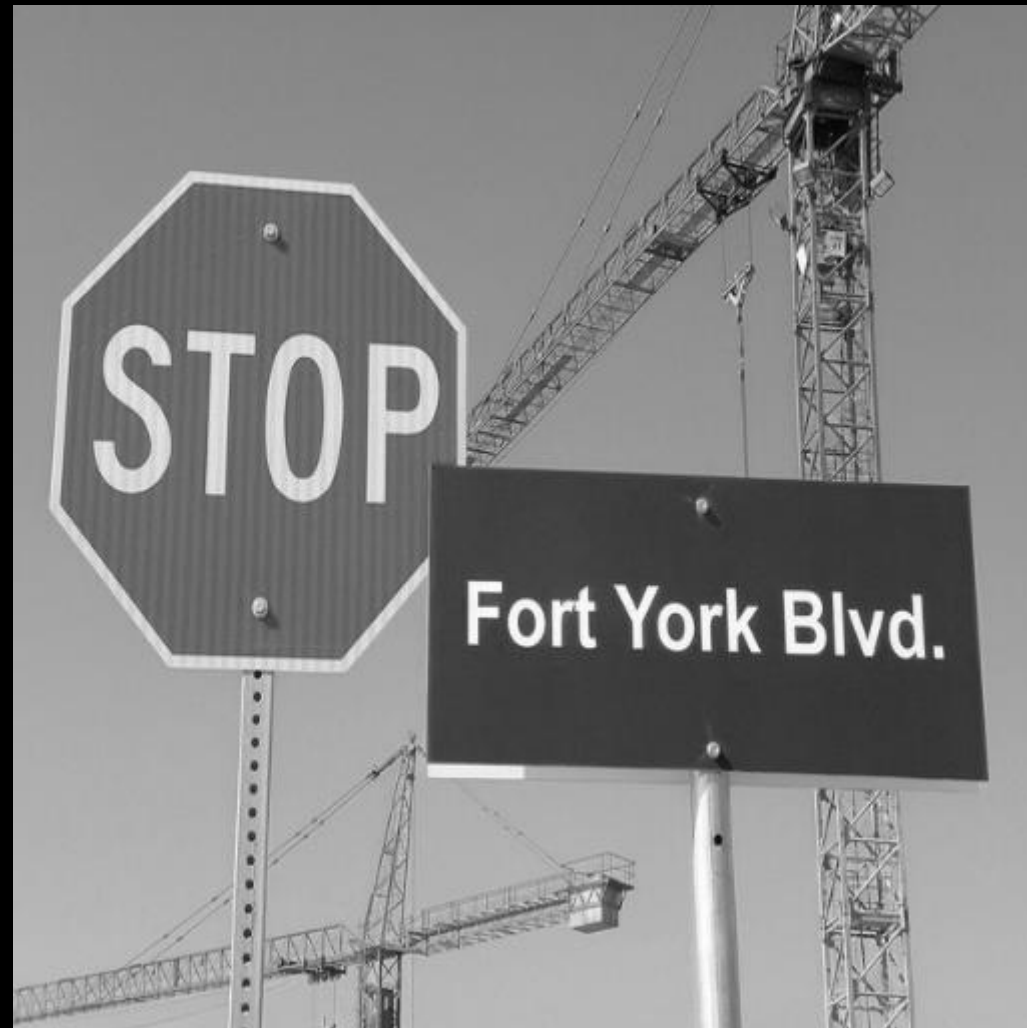

Input

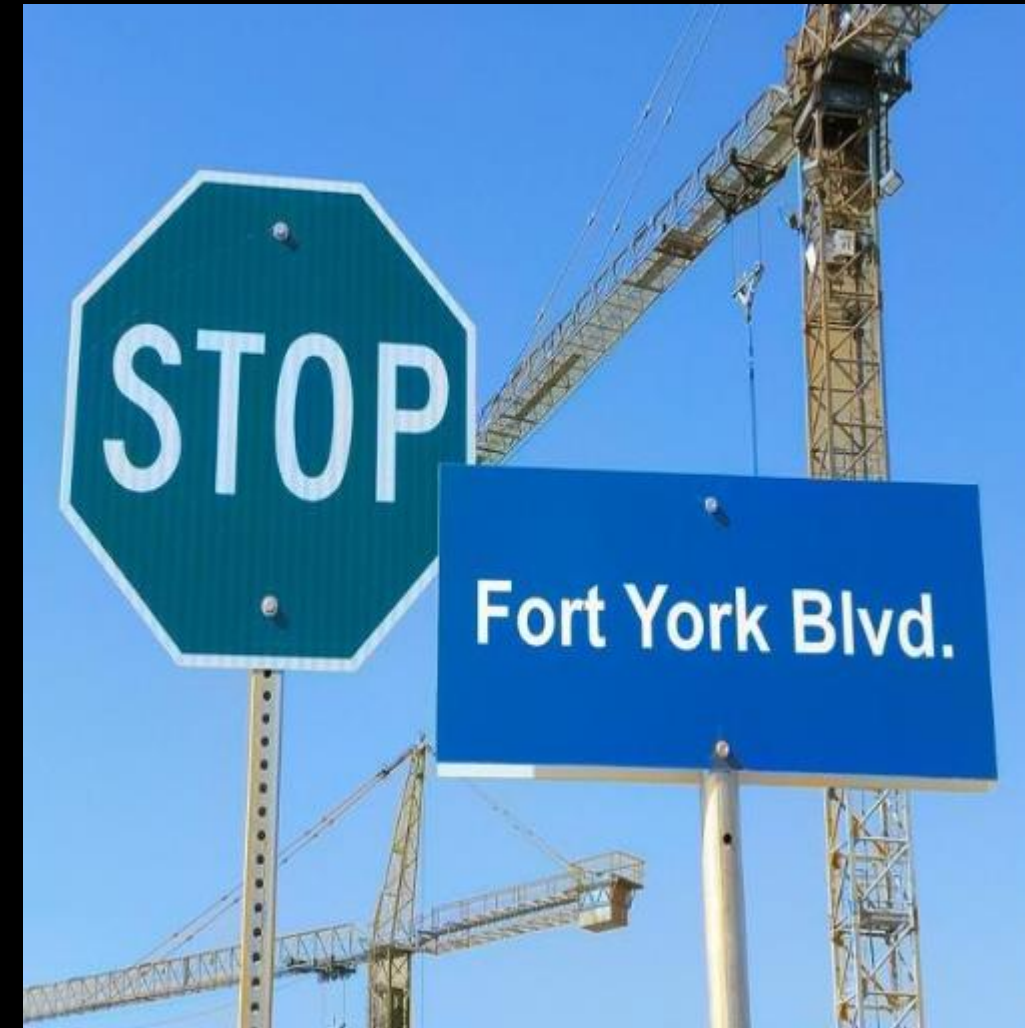

UniColor

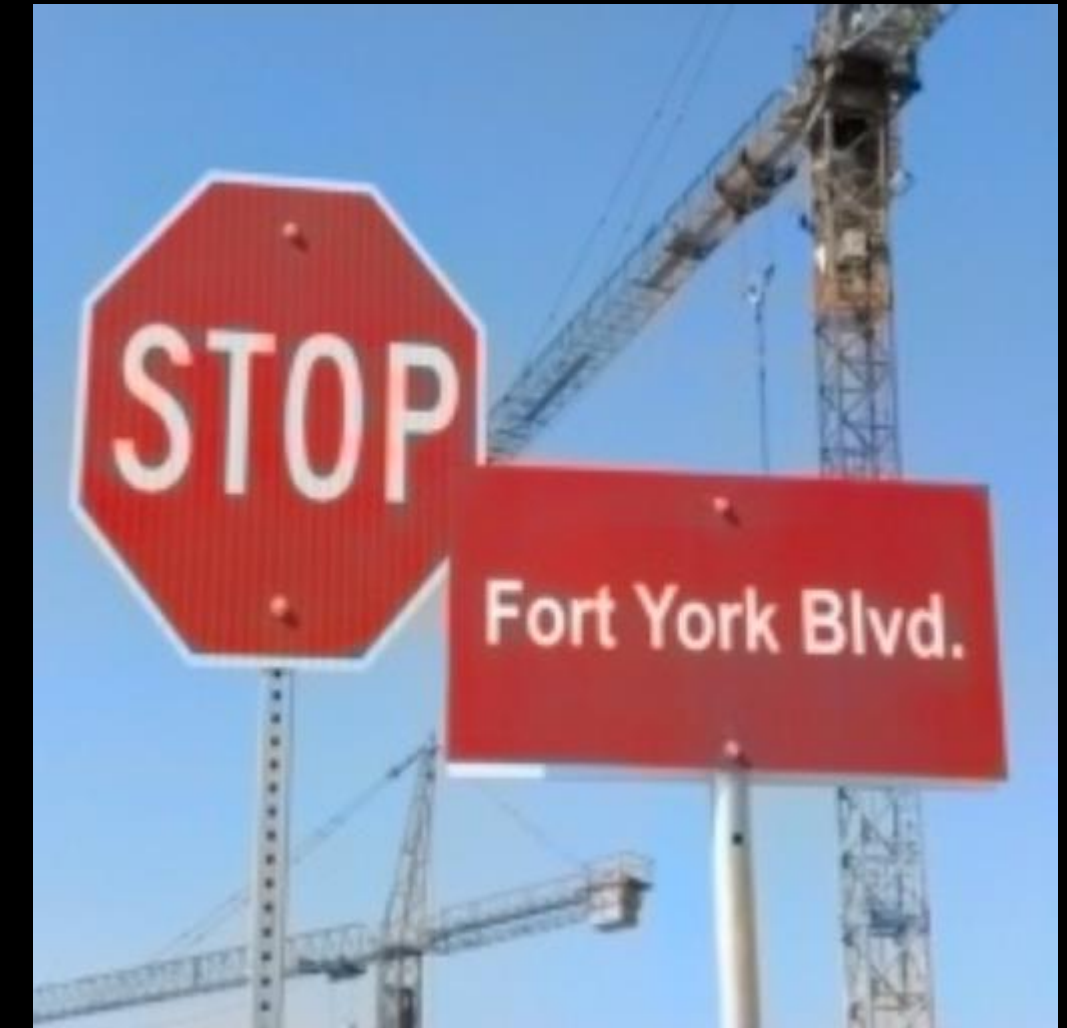

L-CoDe

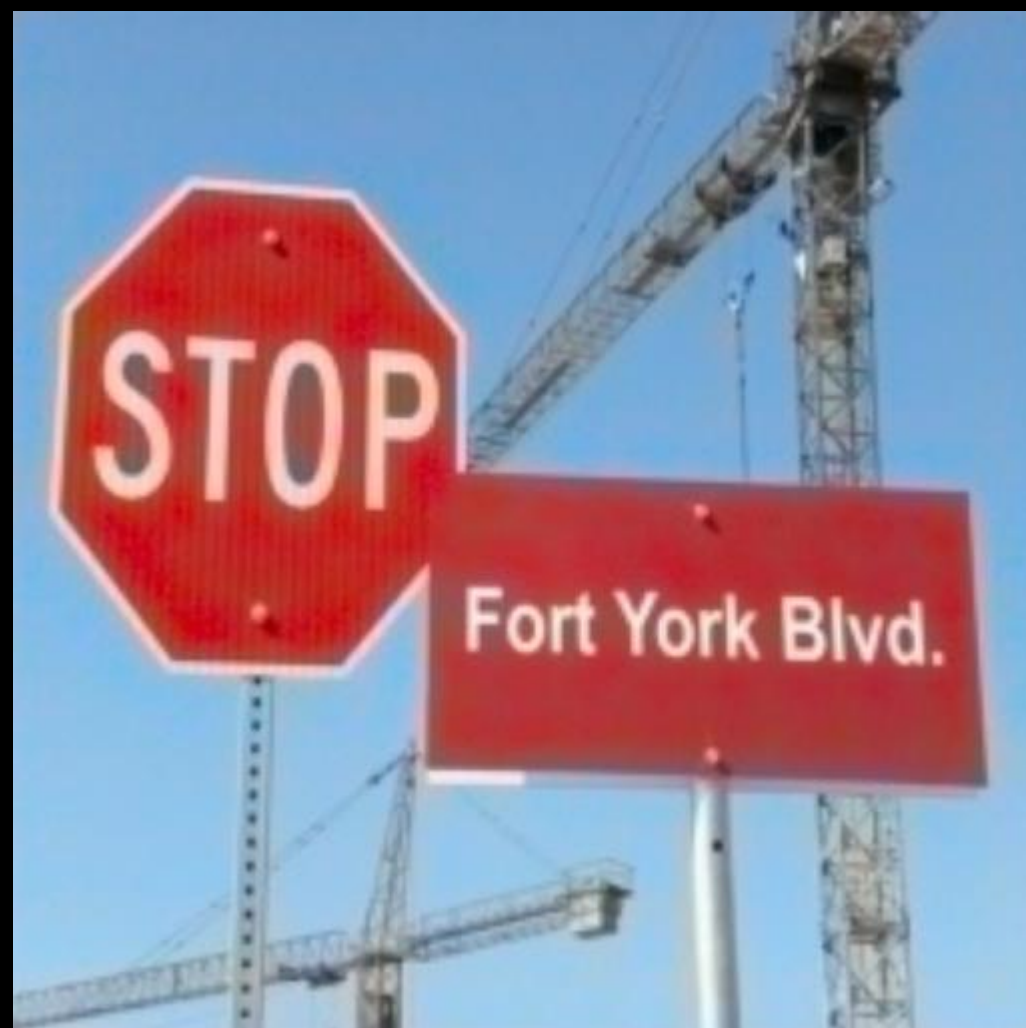

L-CoDer

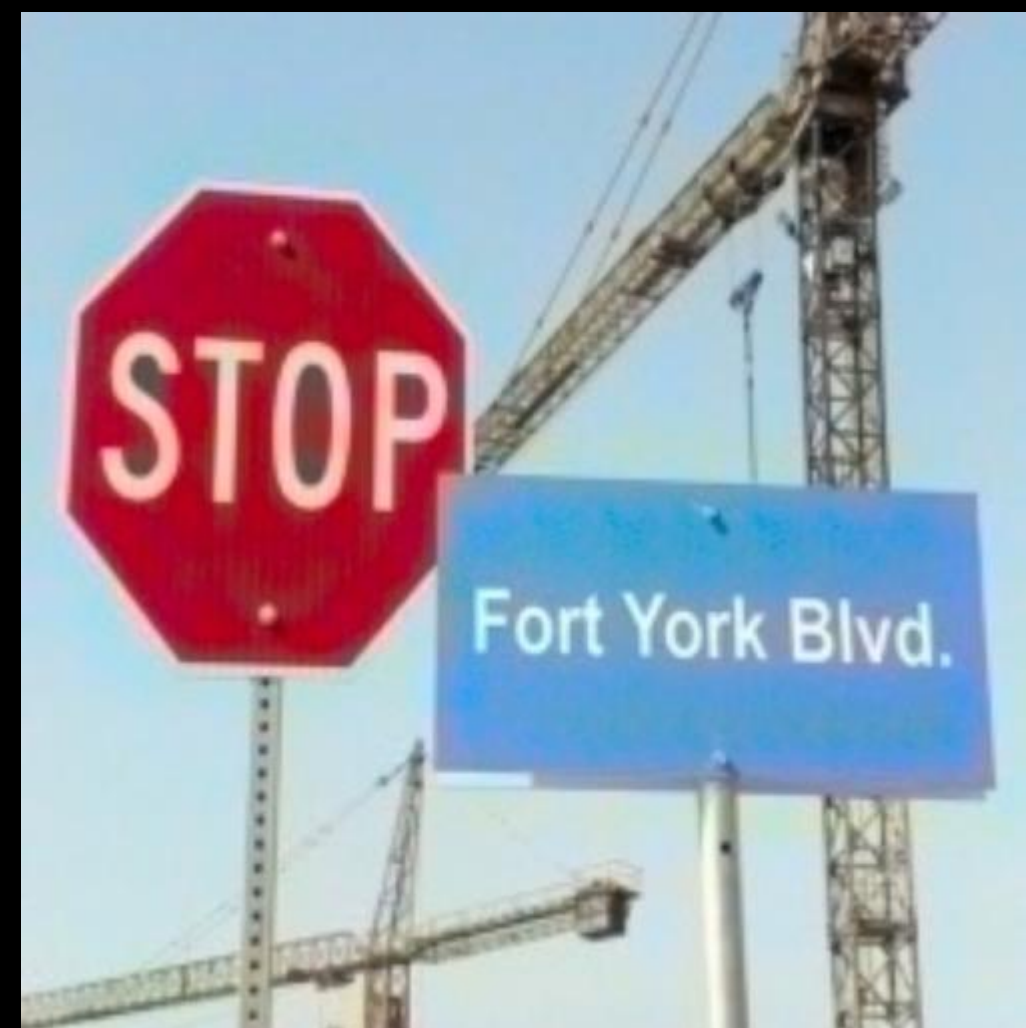

L-CoIns

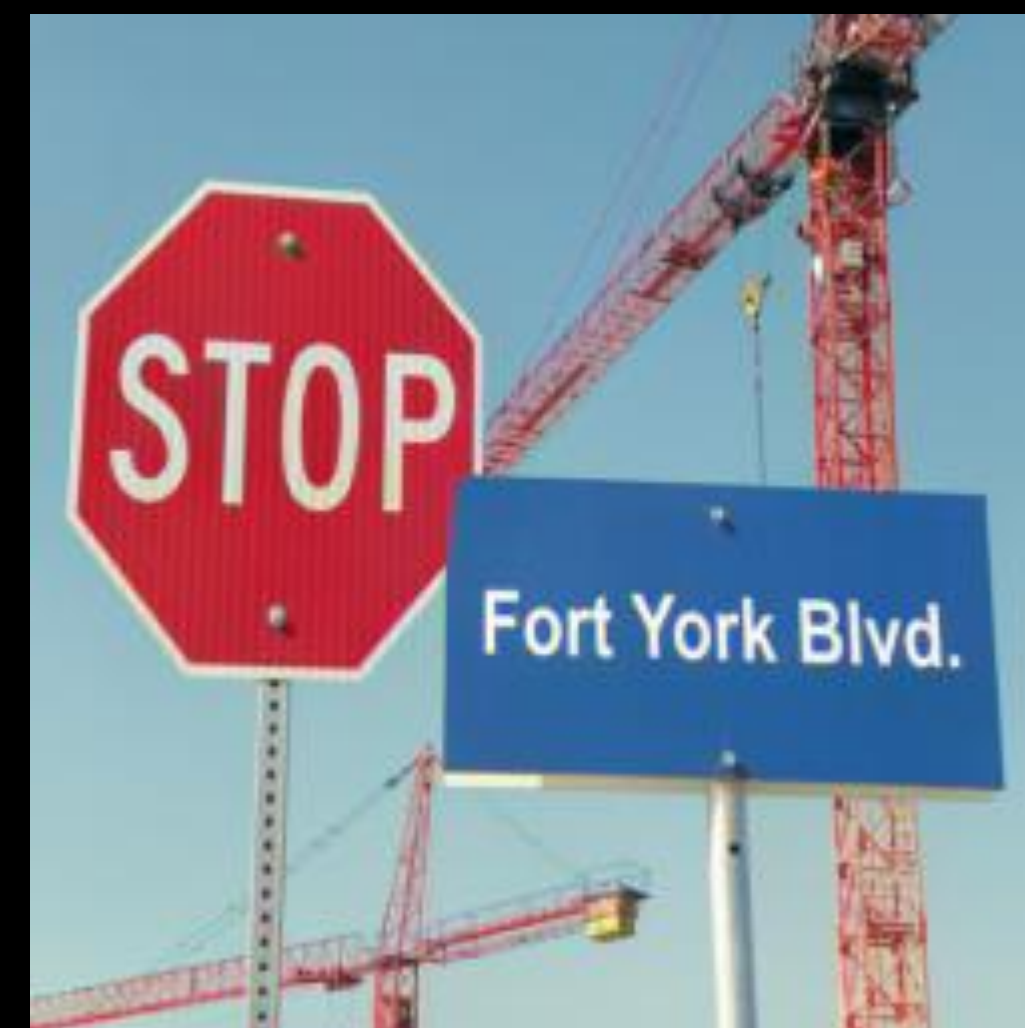

L-CAD

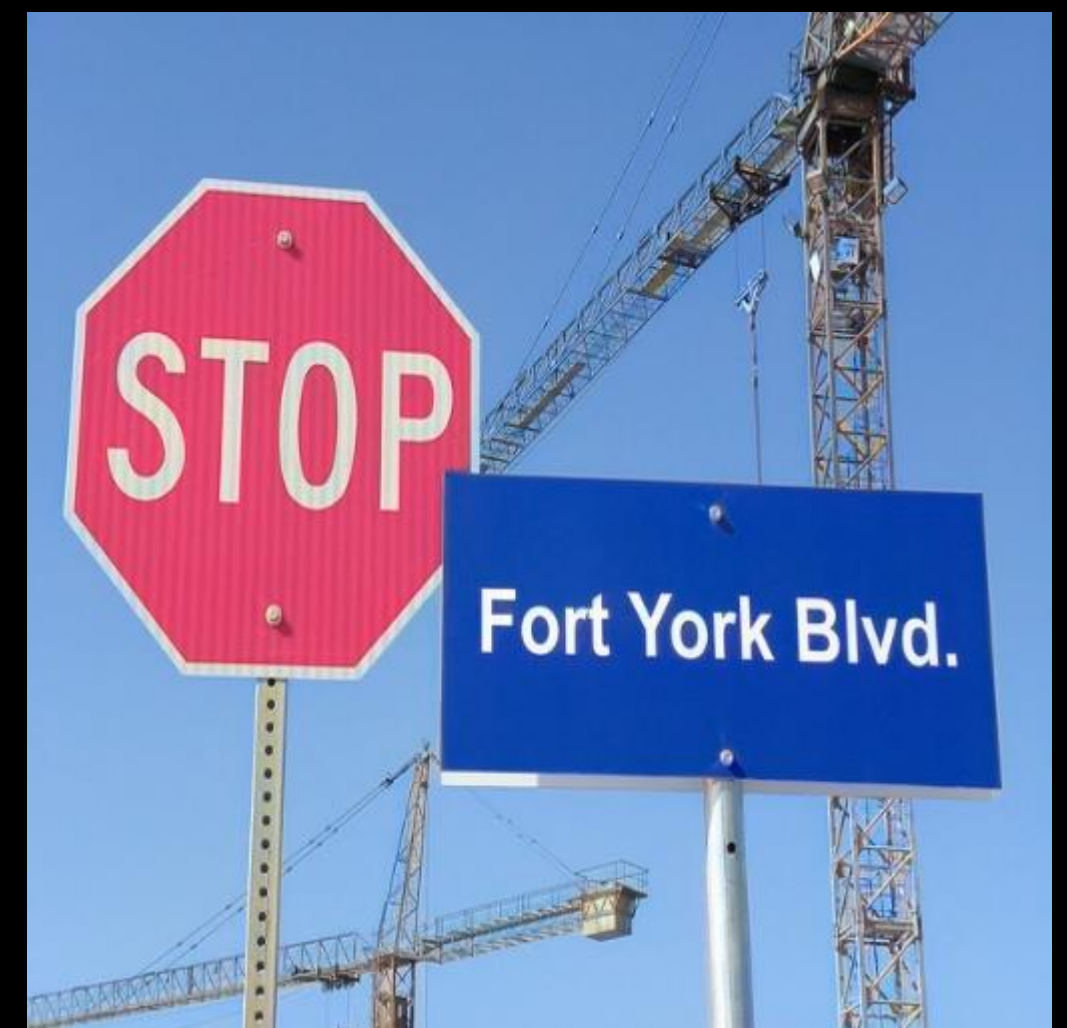

Ours



a large **black**  
counter top sitting  
next to a sink

description

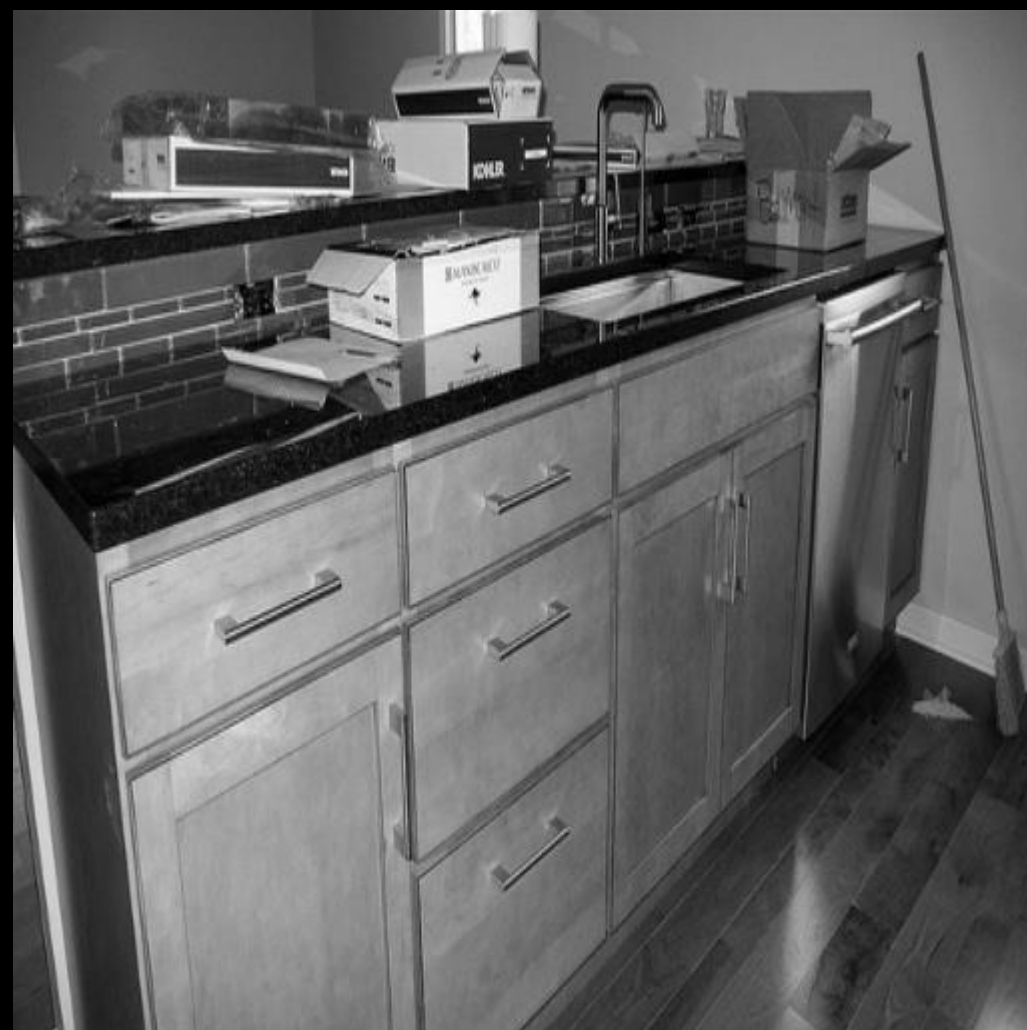

Input

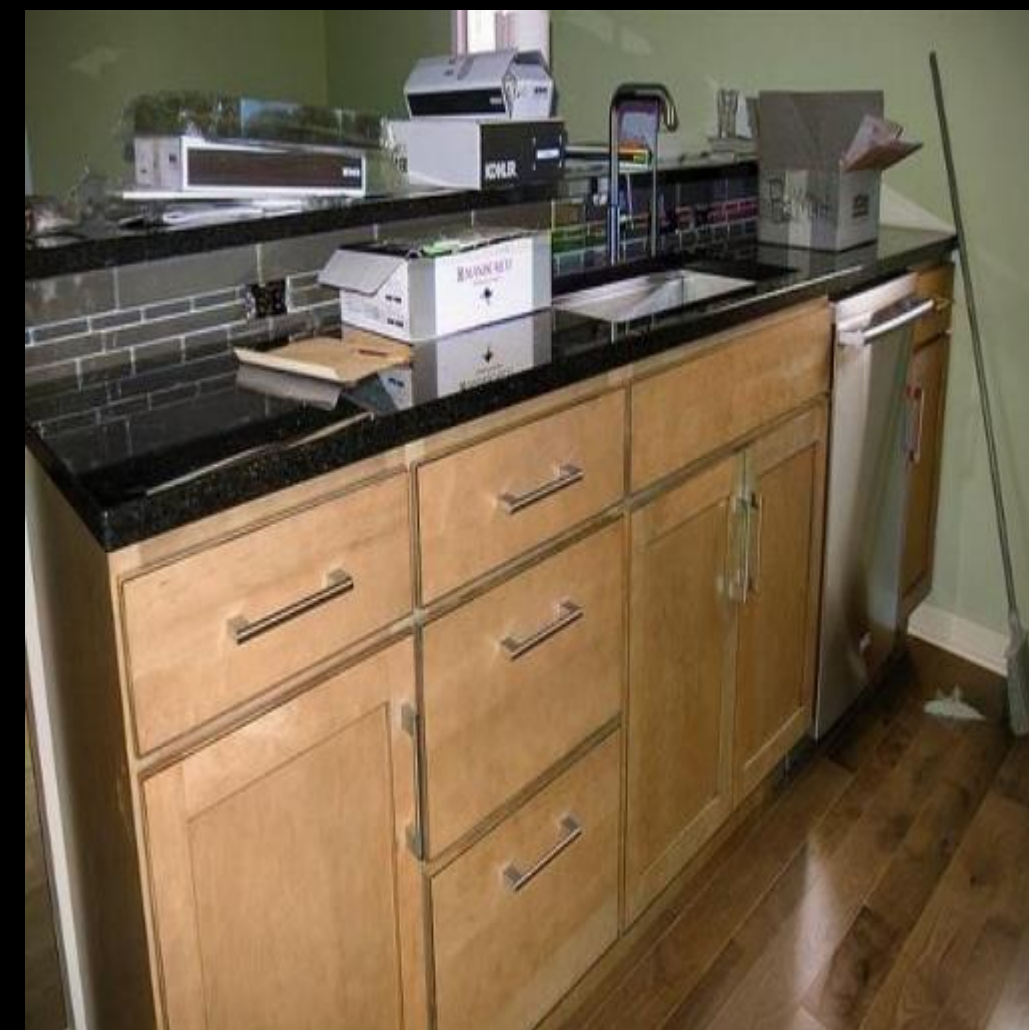

UniColor

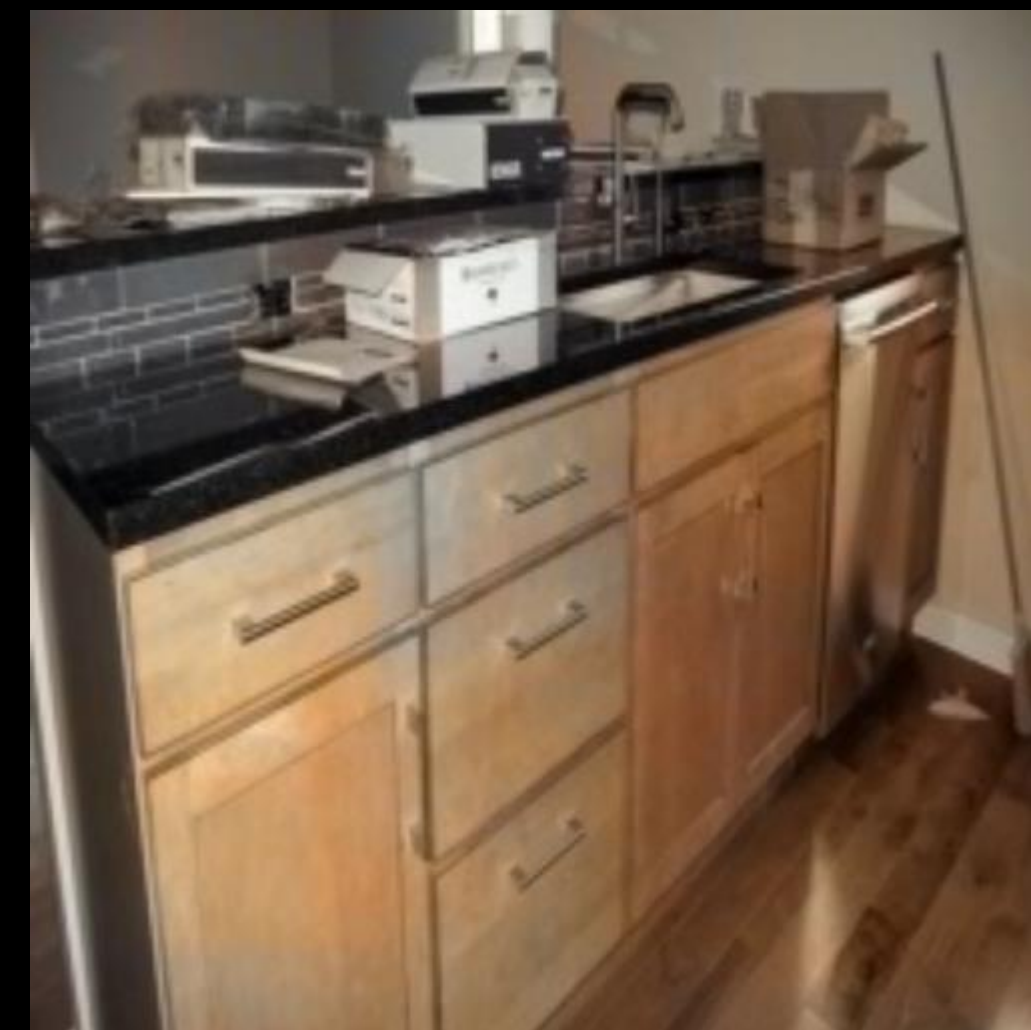

L-CoDe

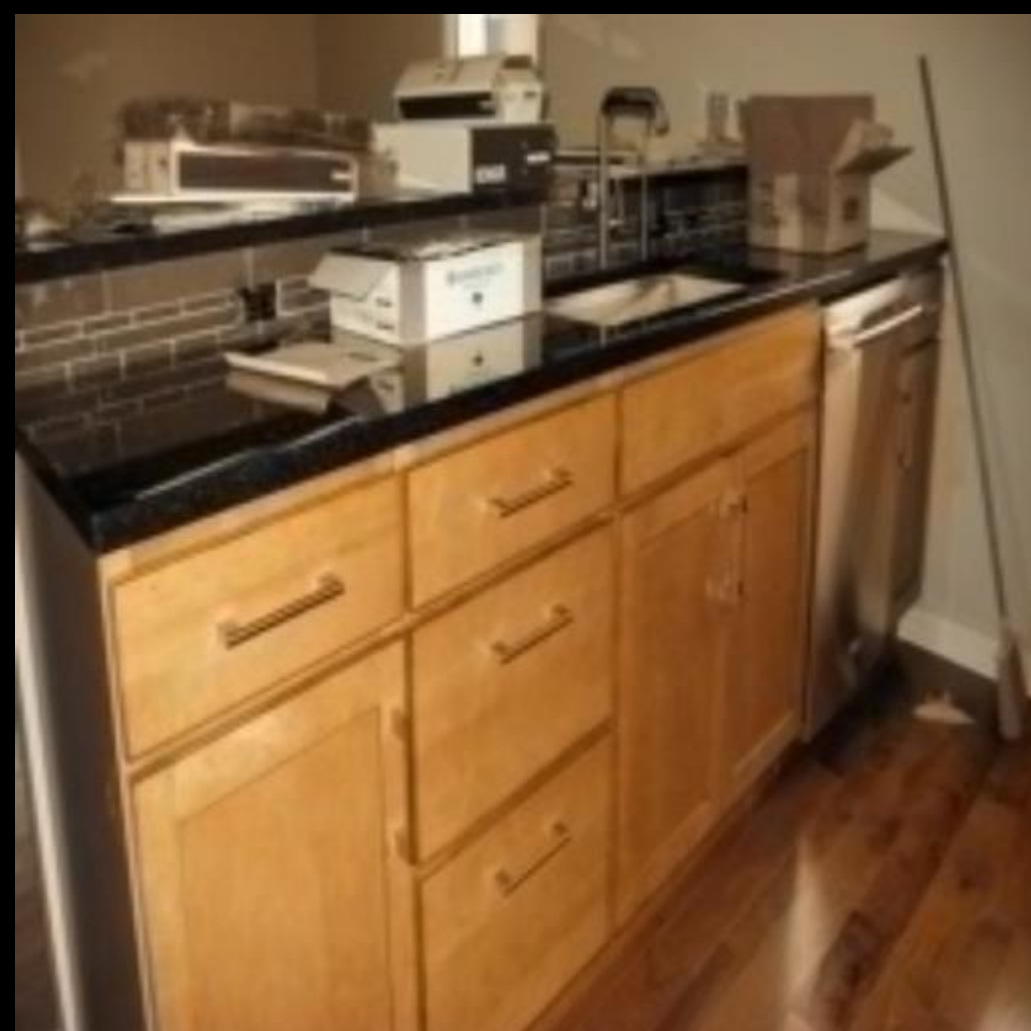

L-CoDer

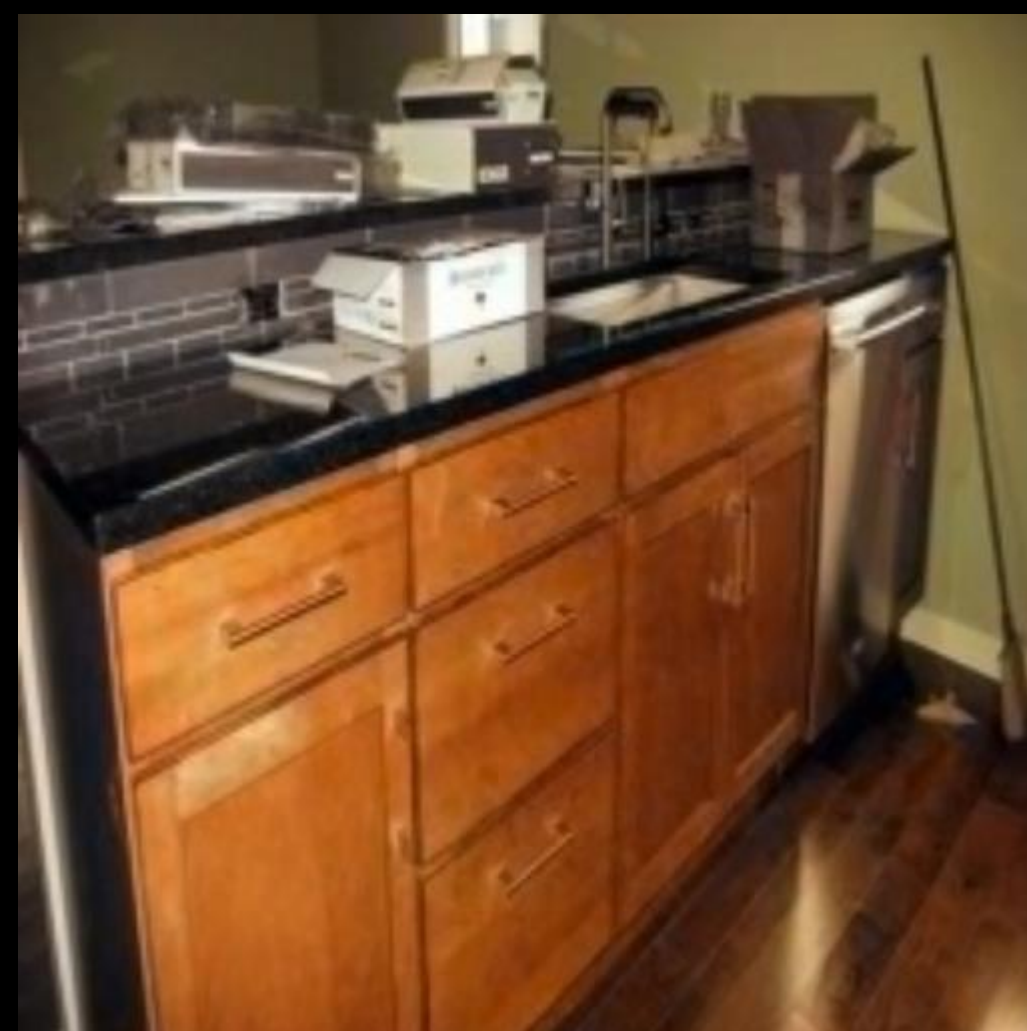

L-CoIns

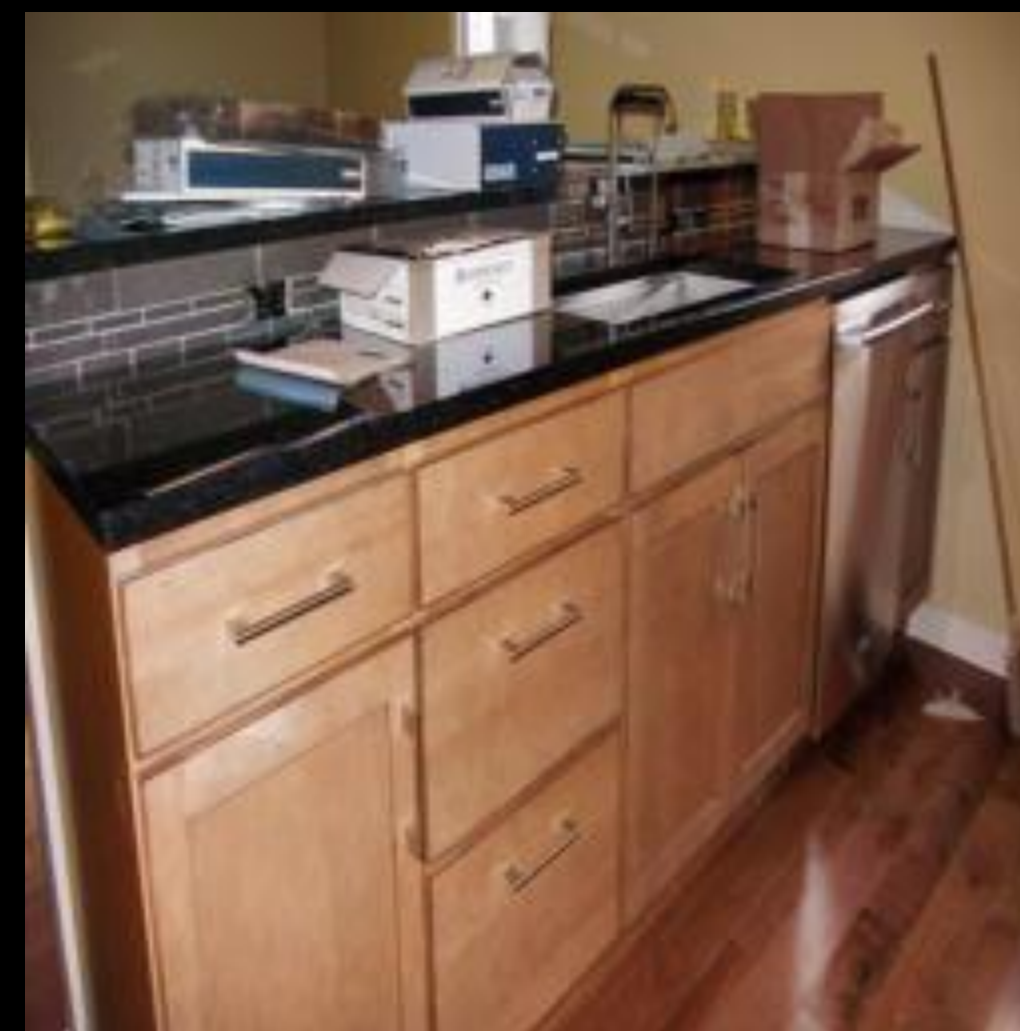

L-CAD

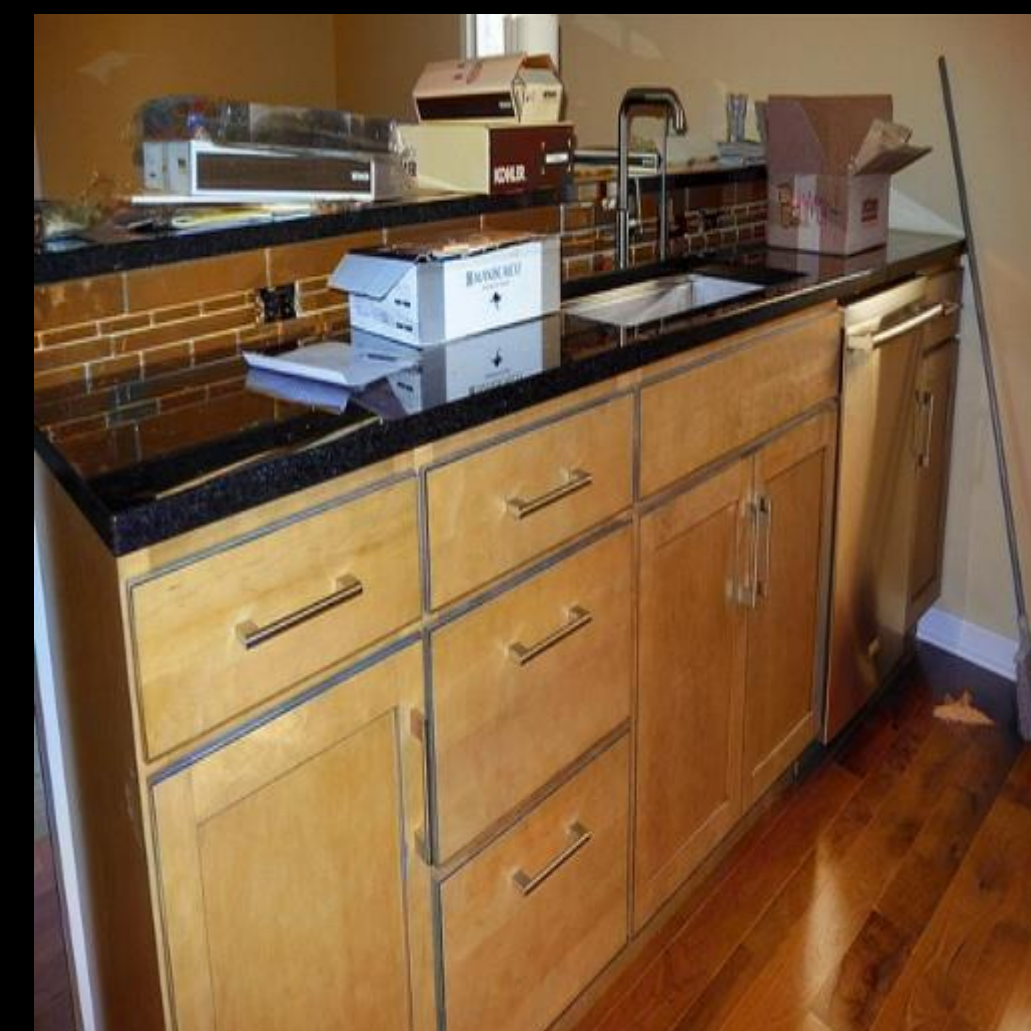

Ours



a man in a white  
suit standing in  
front of some  
bushes

description

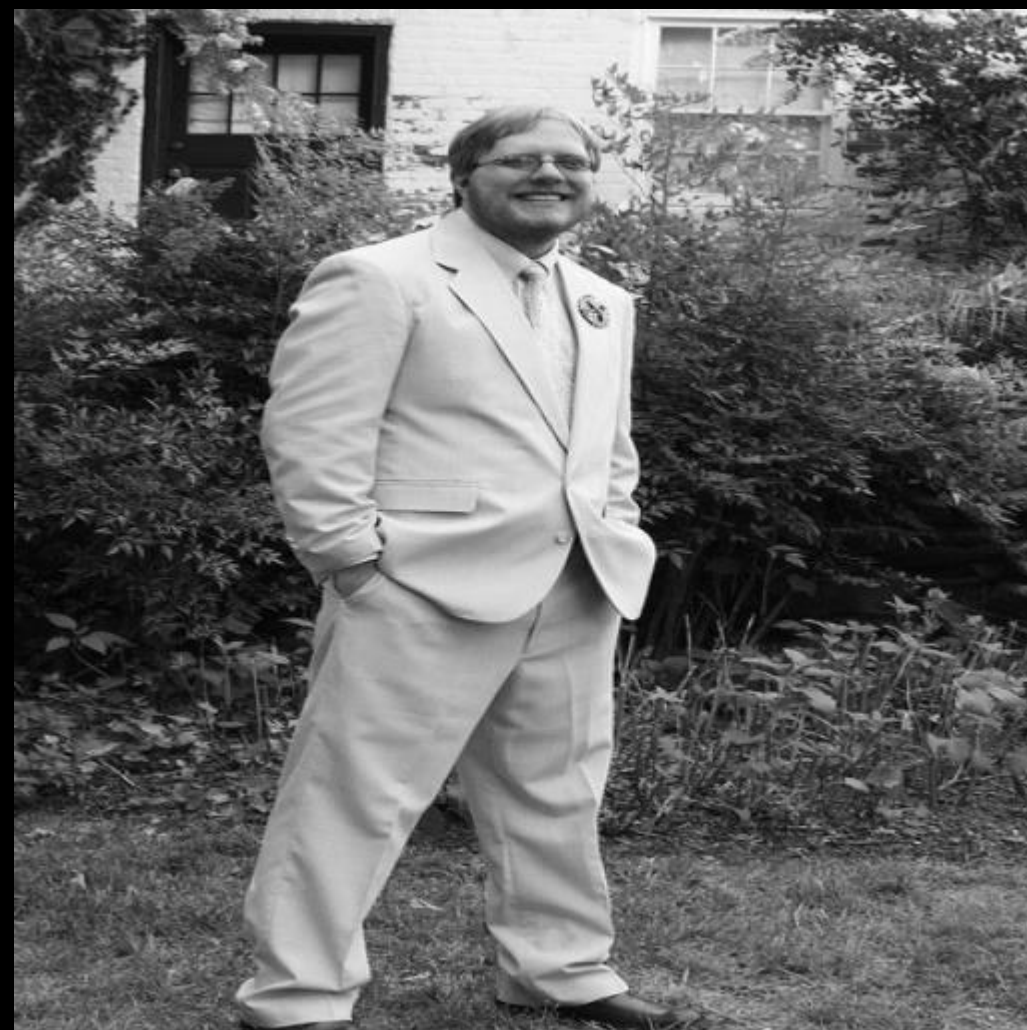

Input

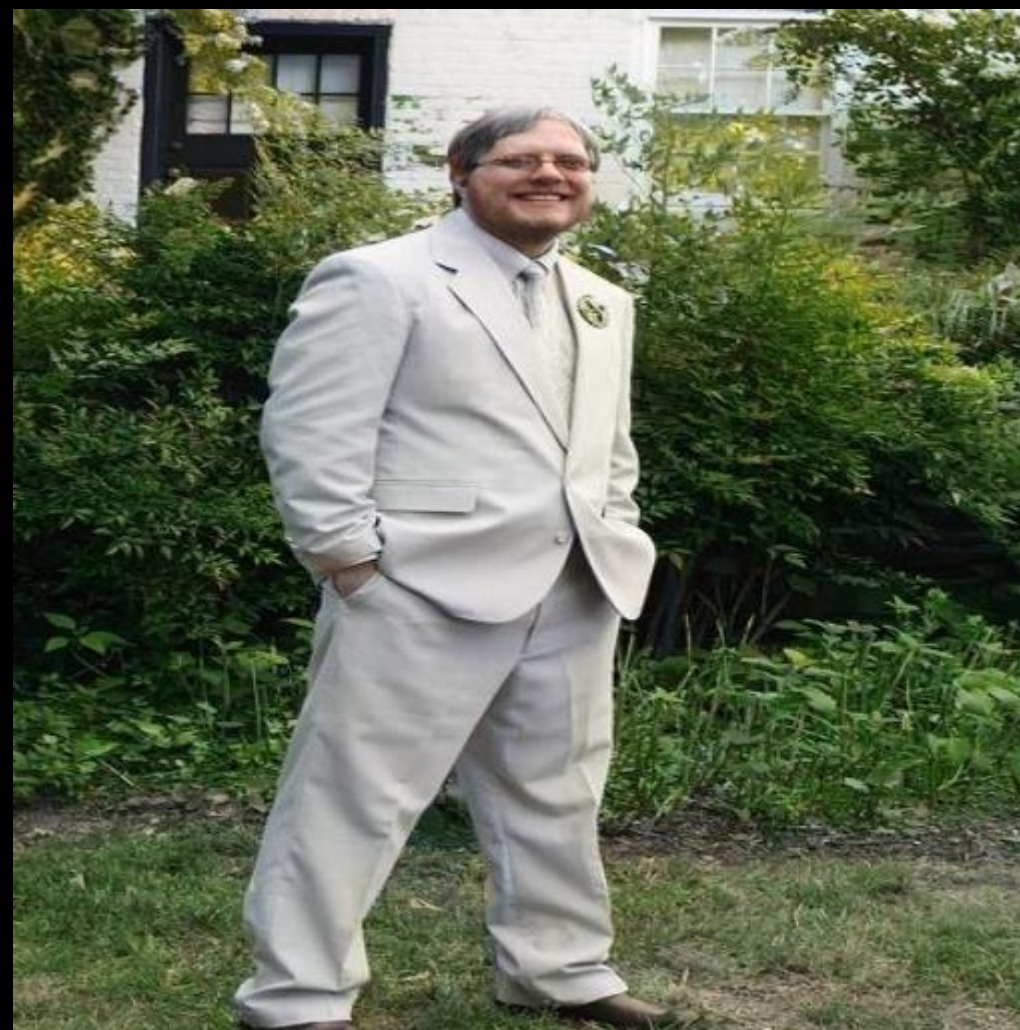

UniColor

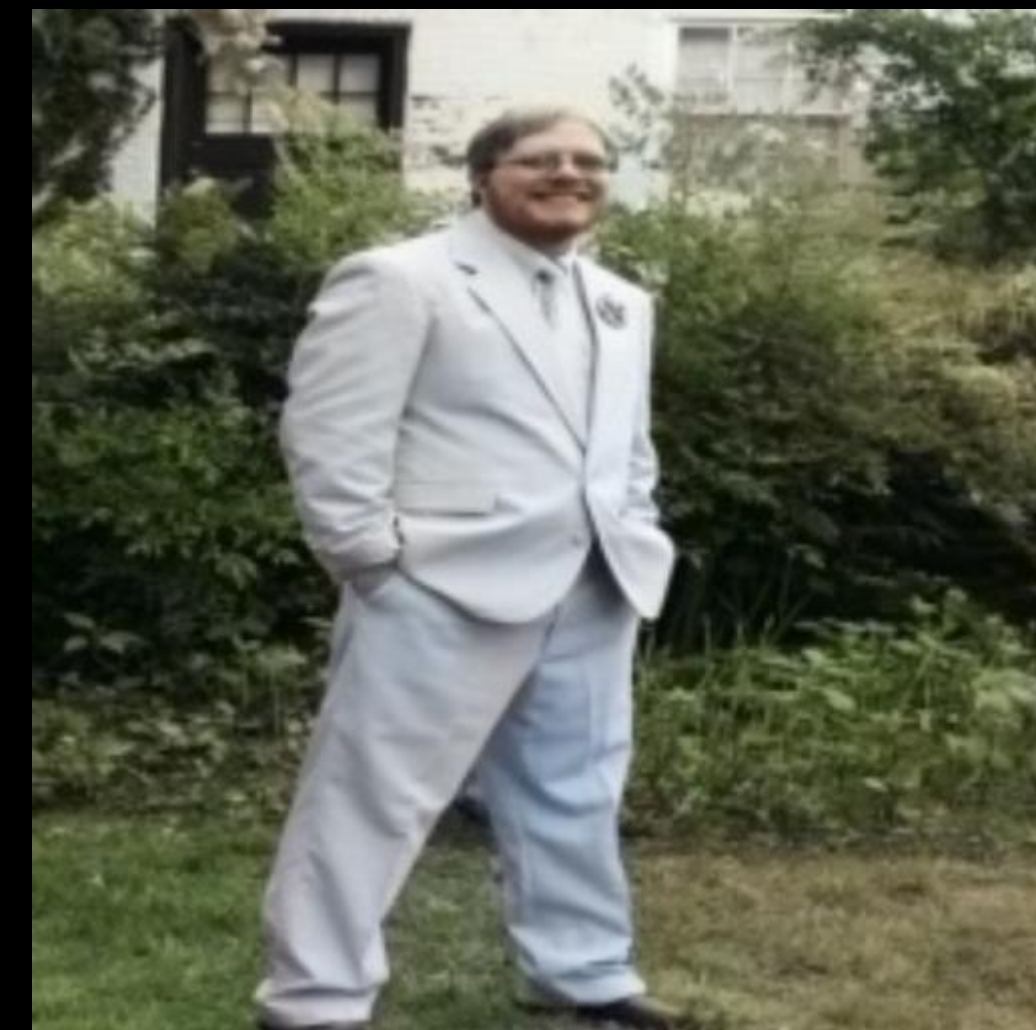

L-CoDe

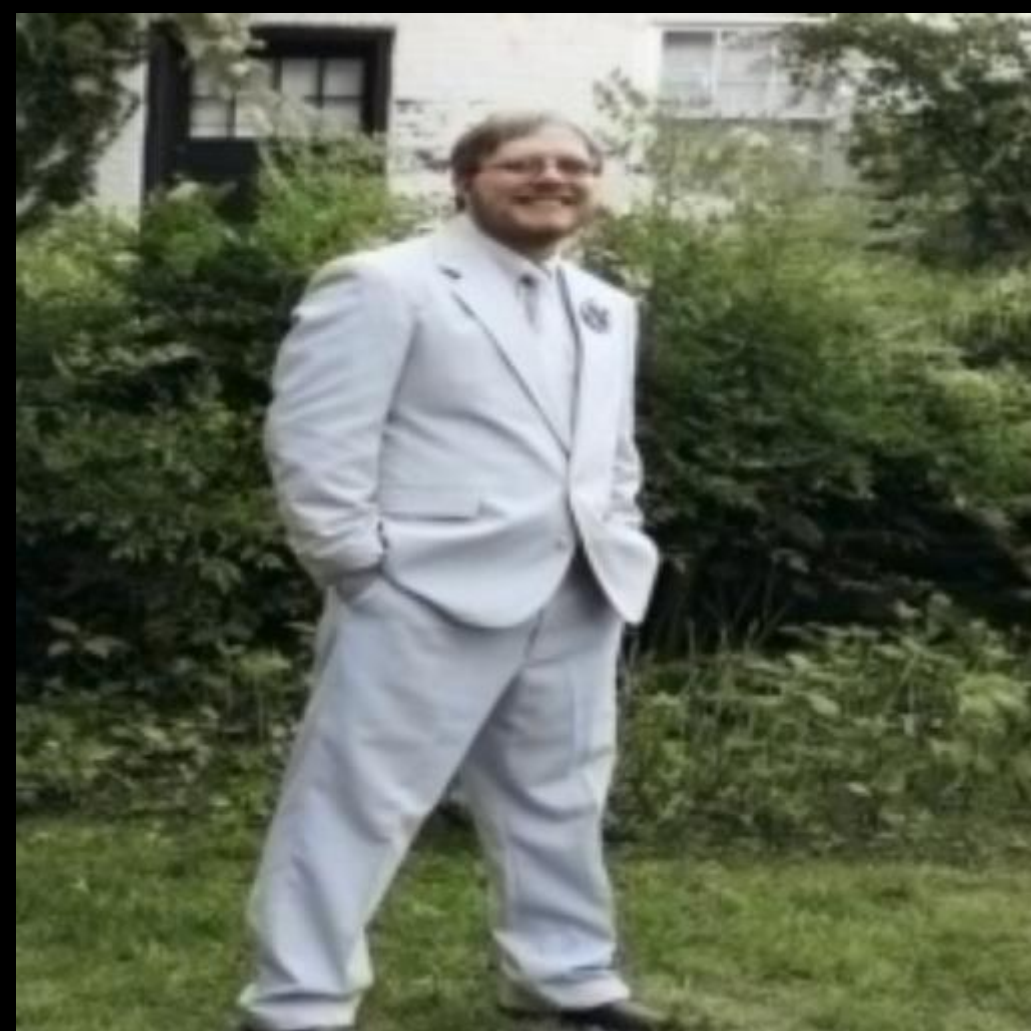

L-CoDer

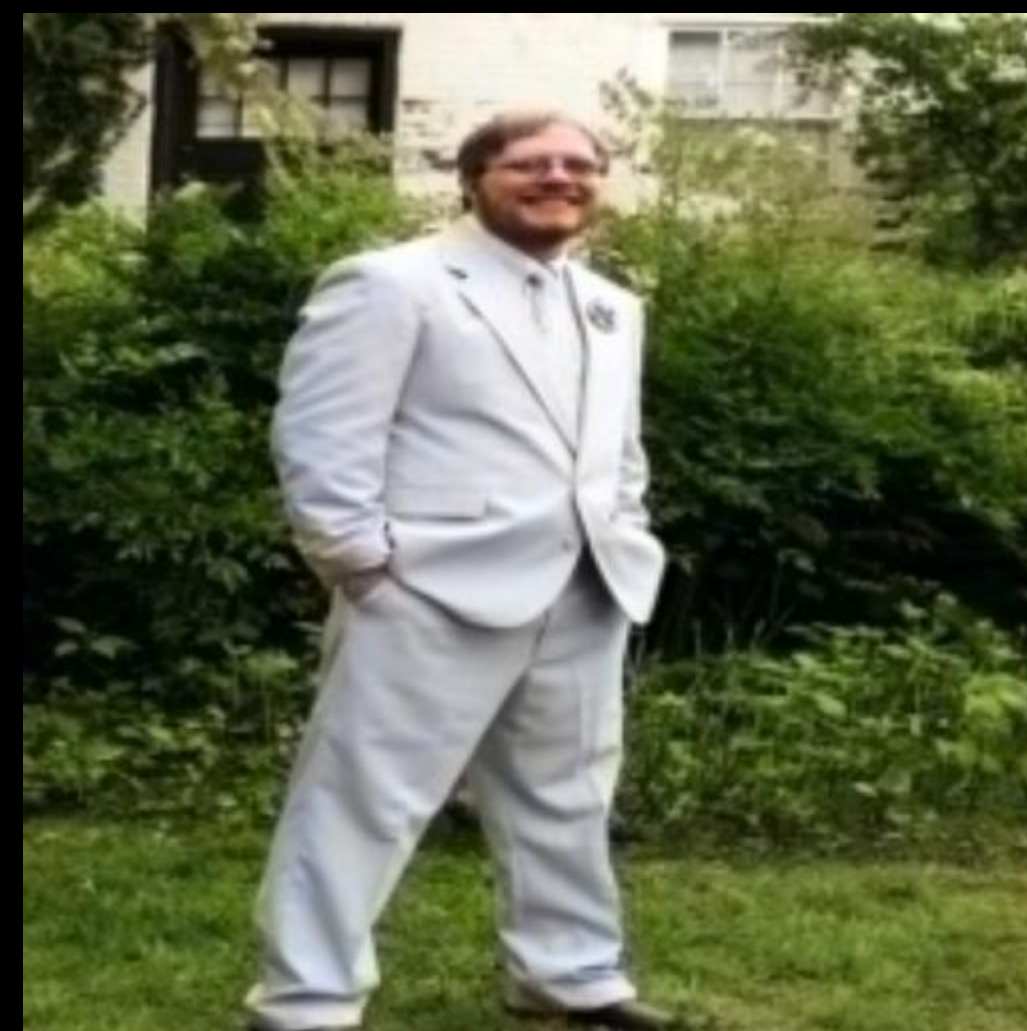

L-CoIns

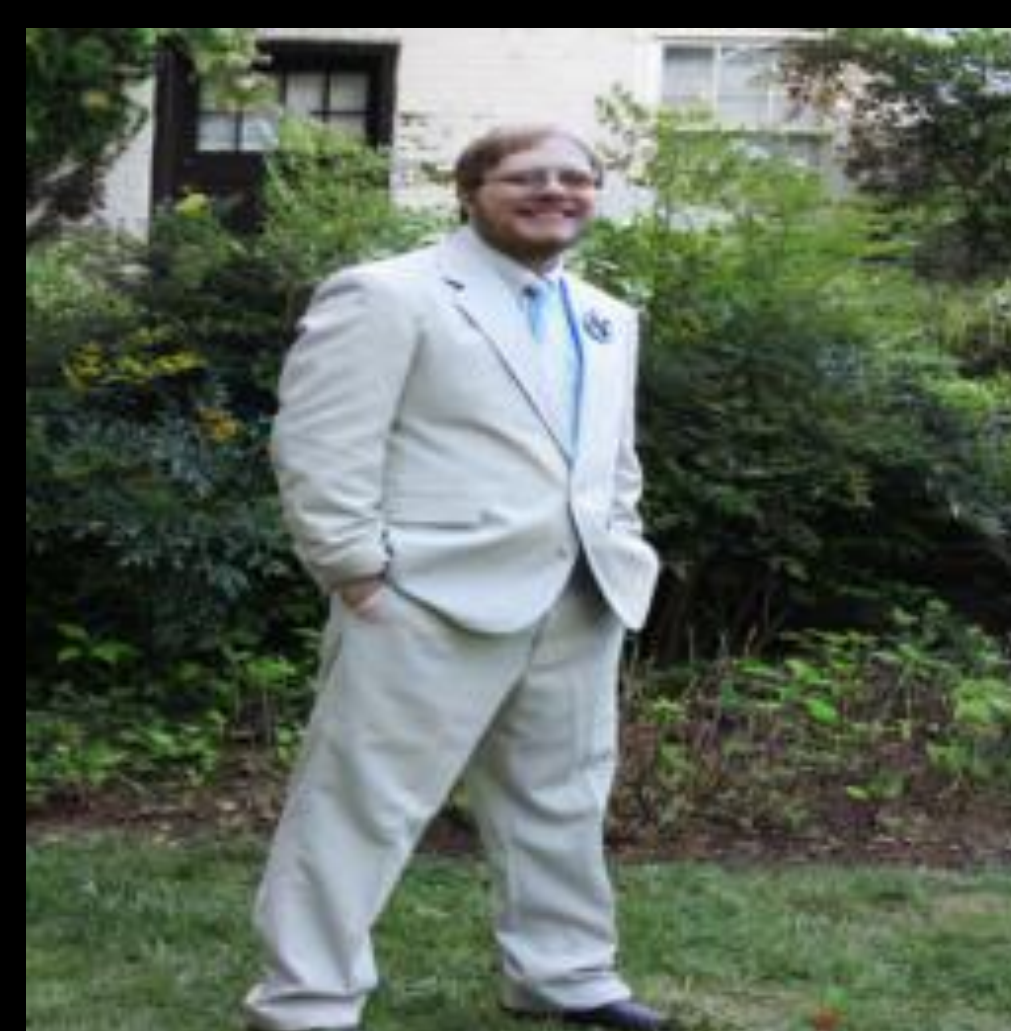

L-CAD

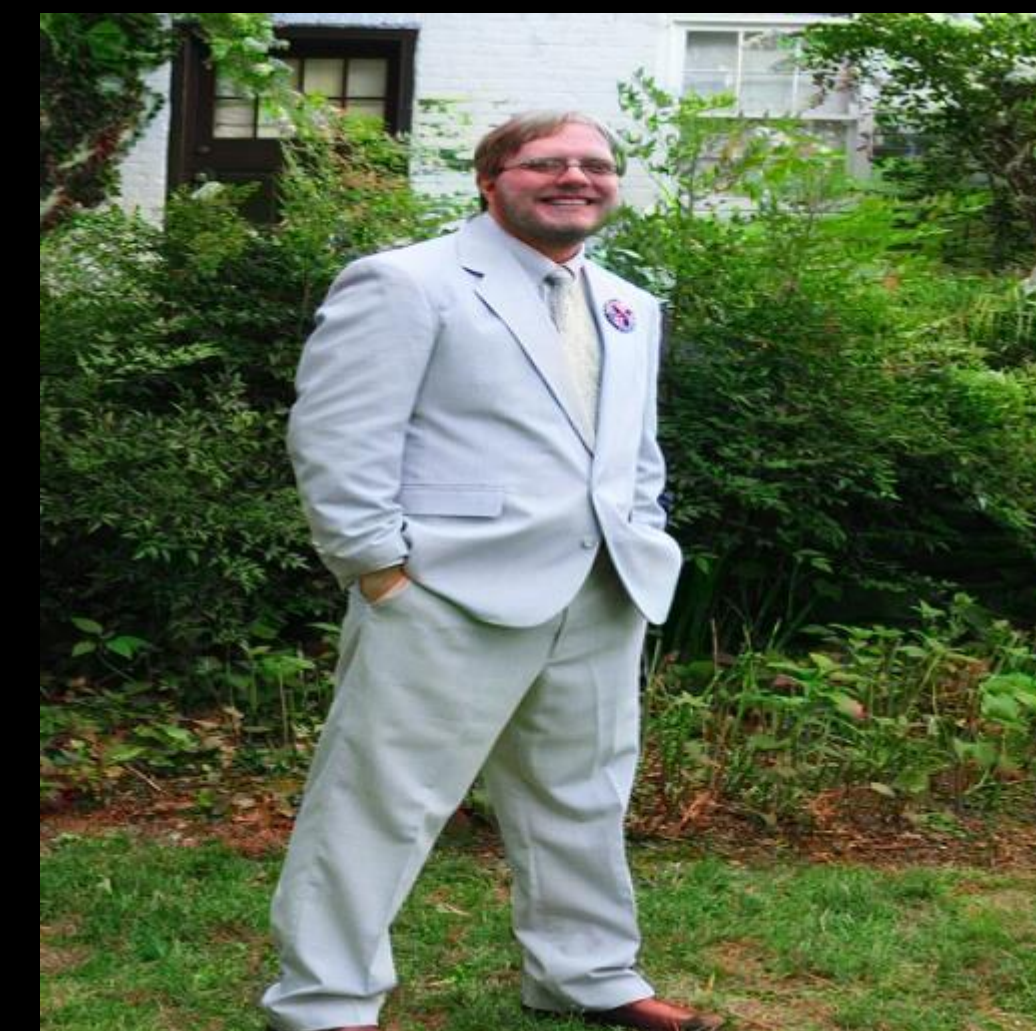

Ours



some control  
buttons on an  
**orange** and silver  
electronic device

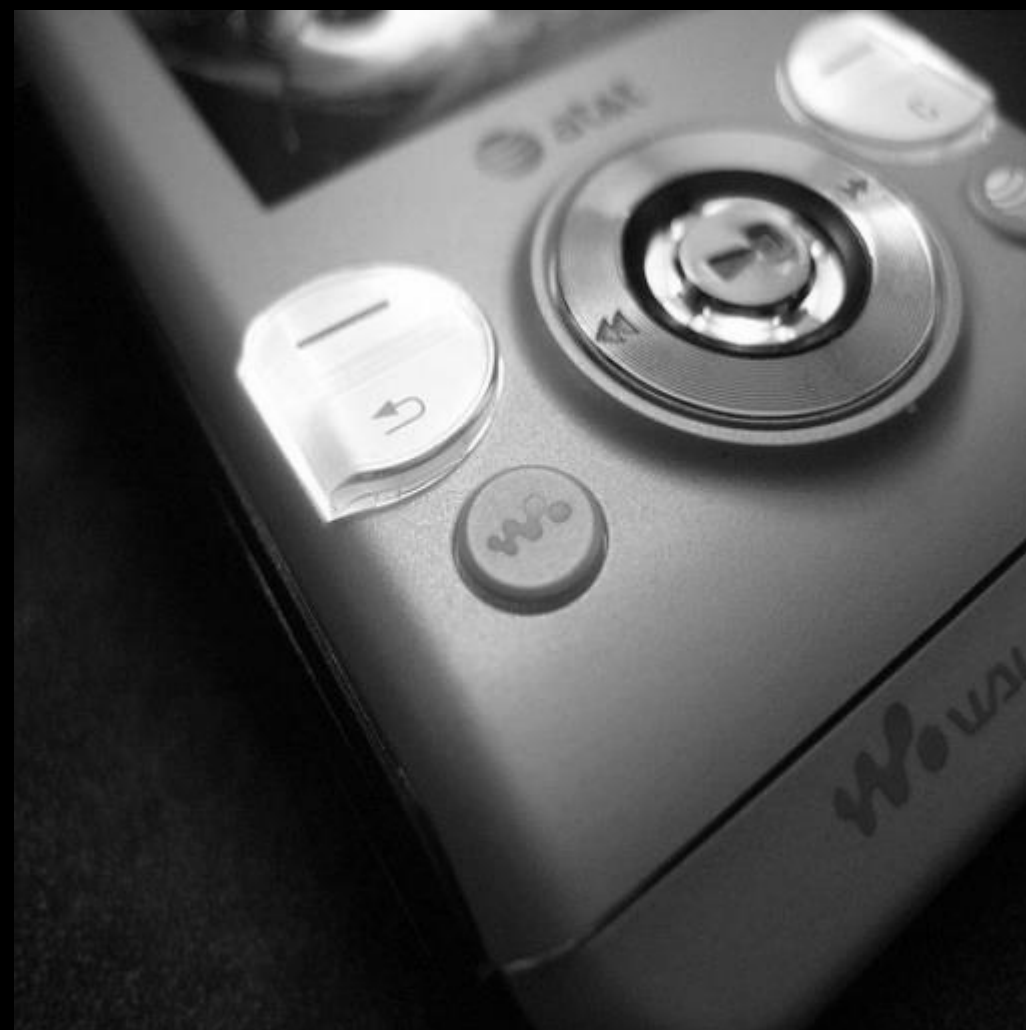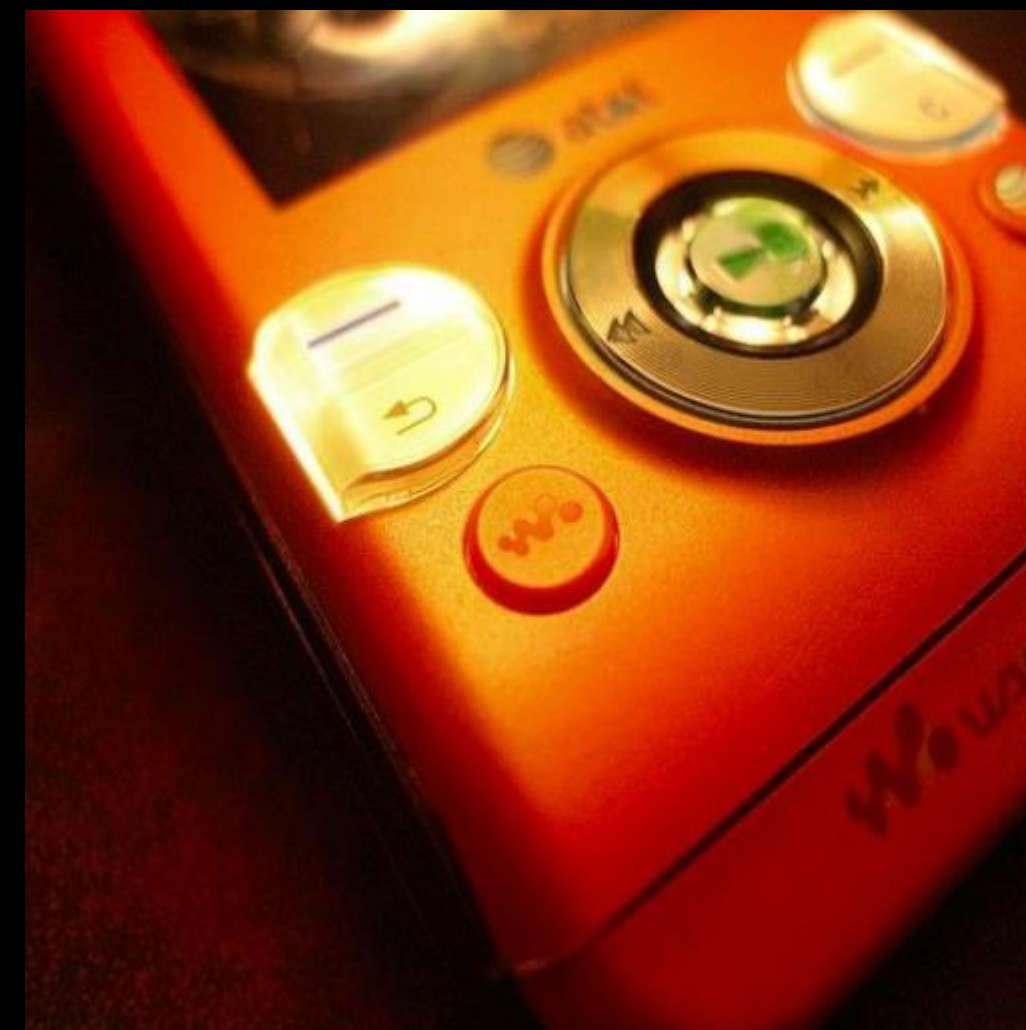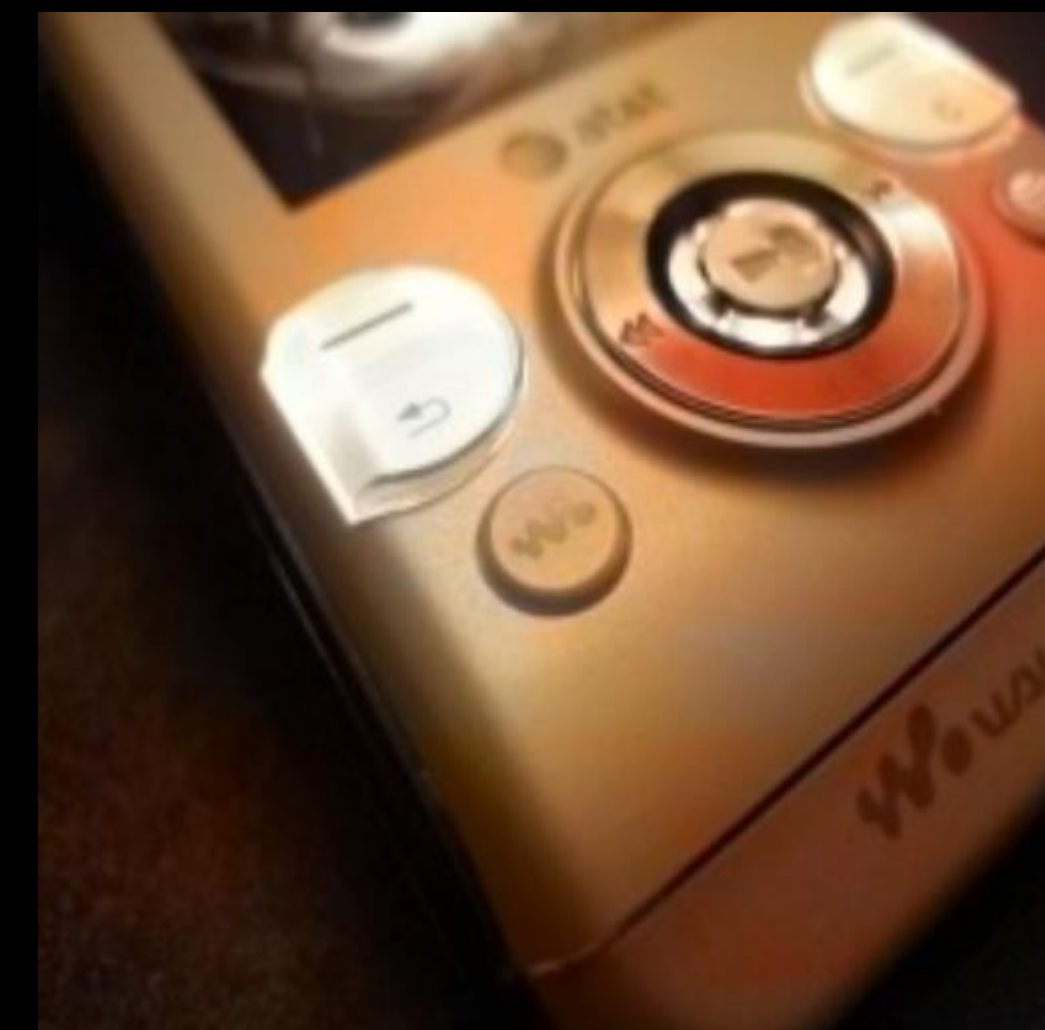

description

Input

UniColor

L-CoDe

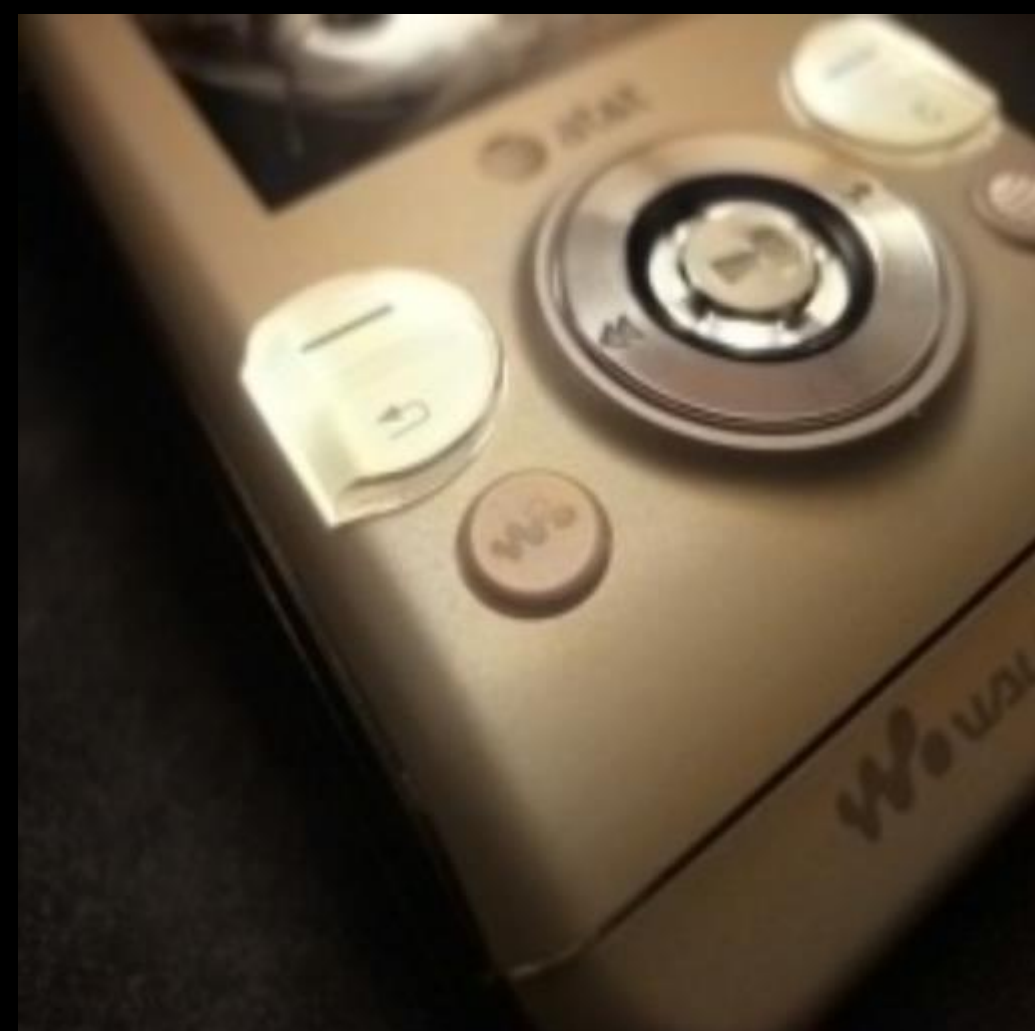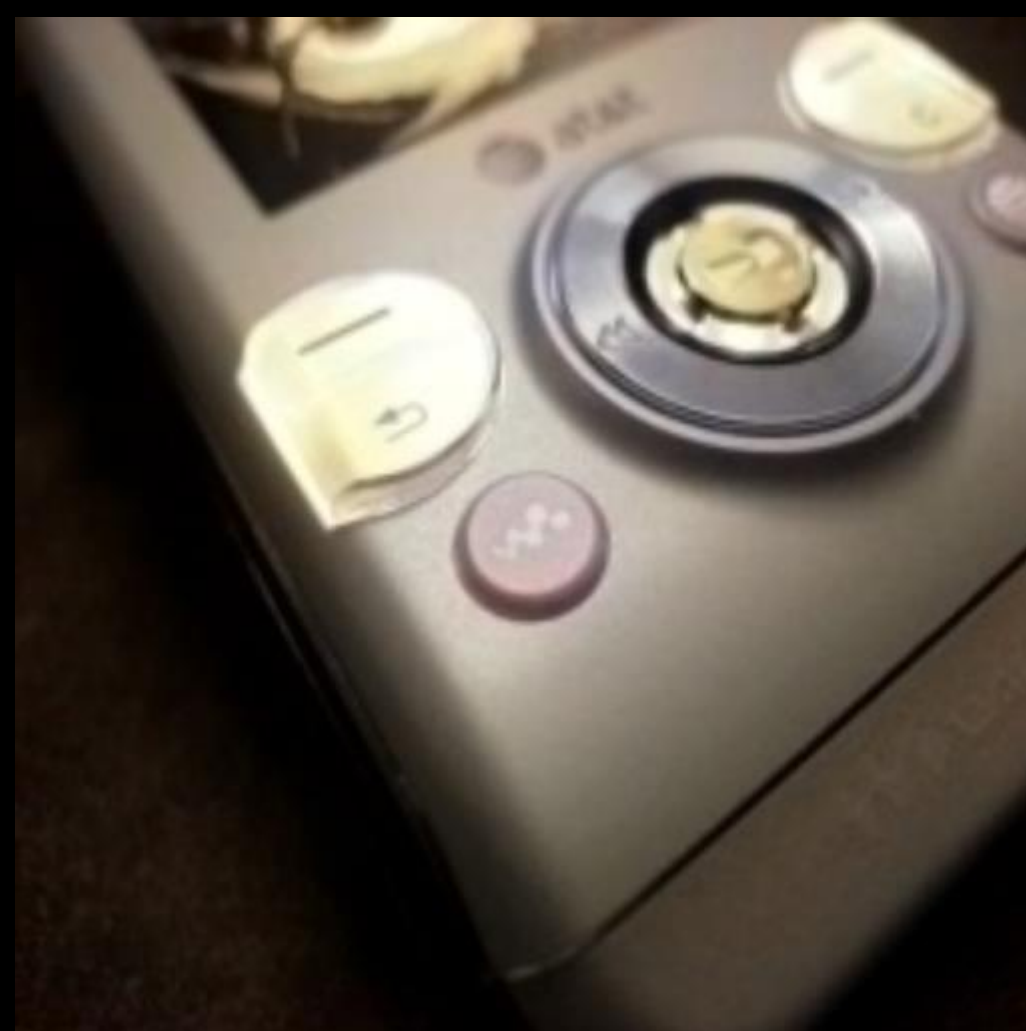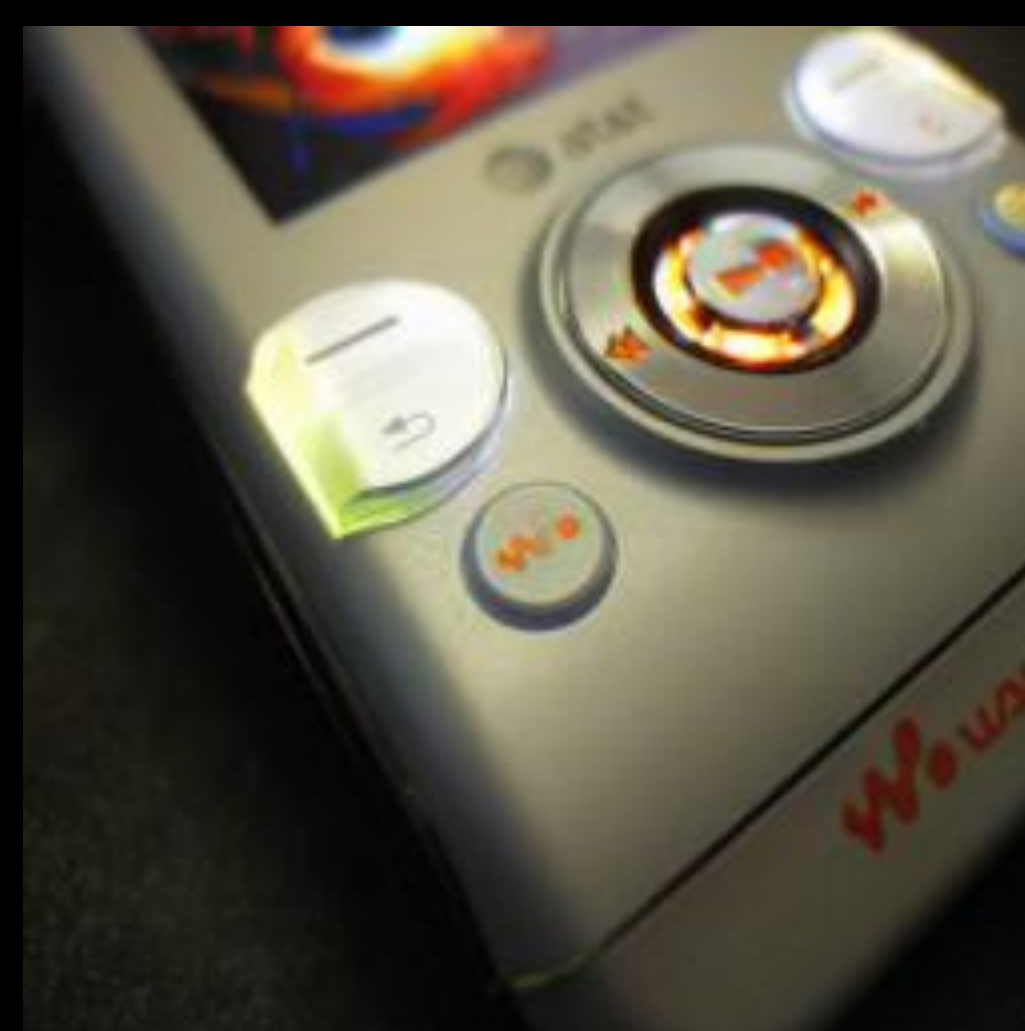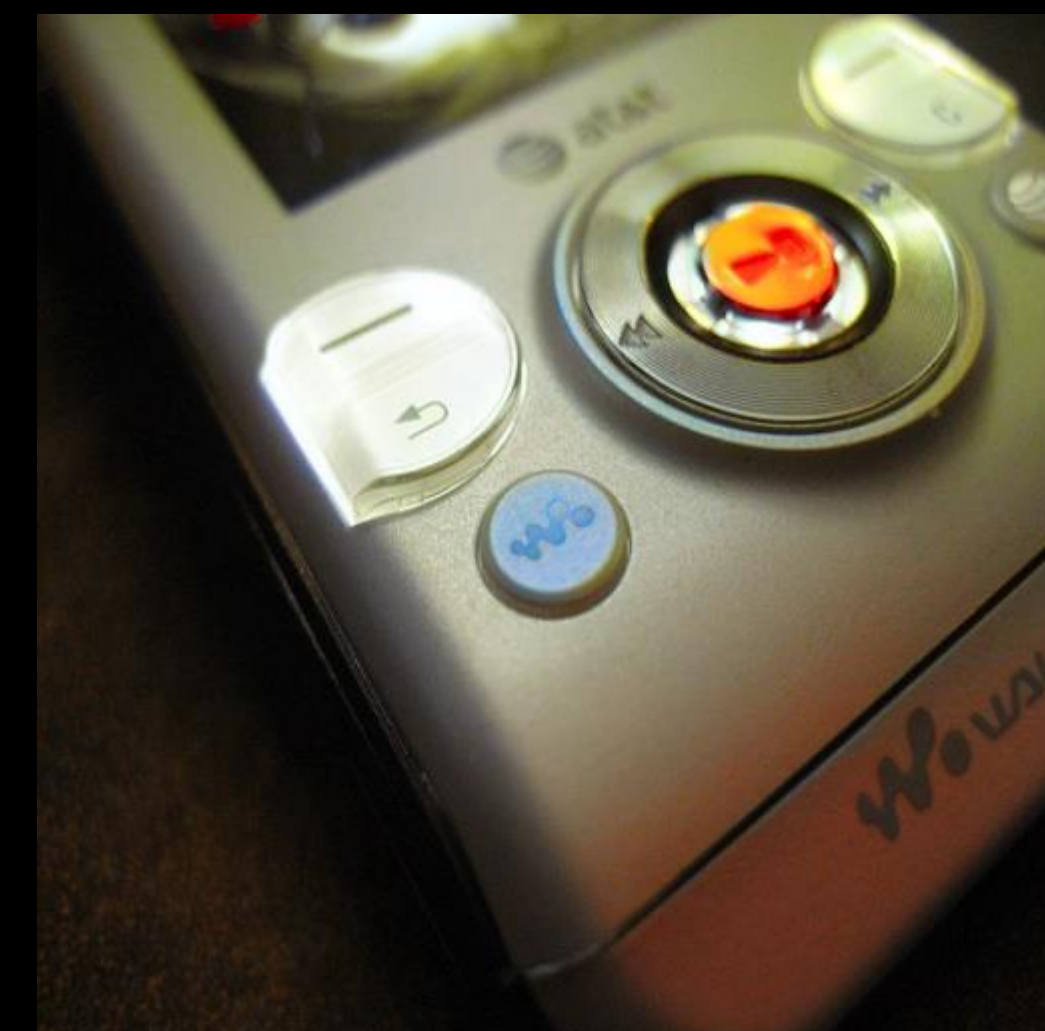

L-CoDer

L-CoIns

L-CAD

Ours



a fire hydrant that  
has been painted  
green on top

description

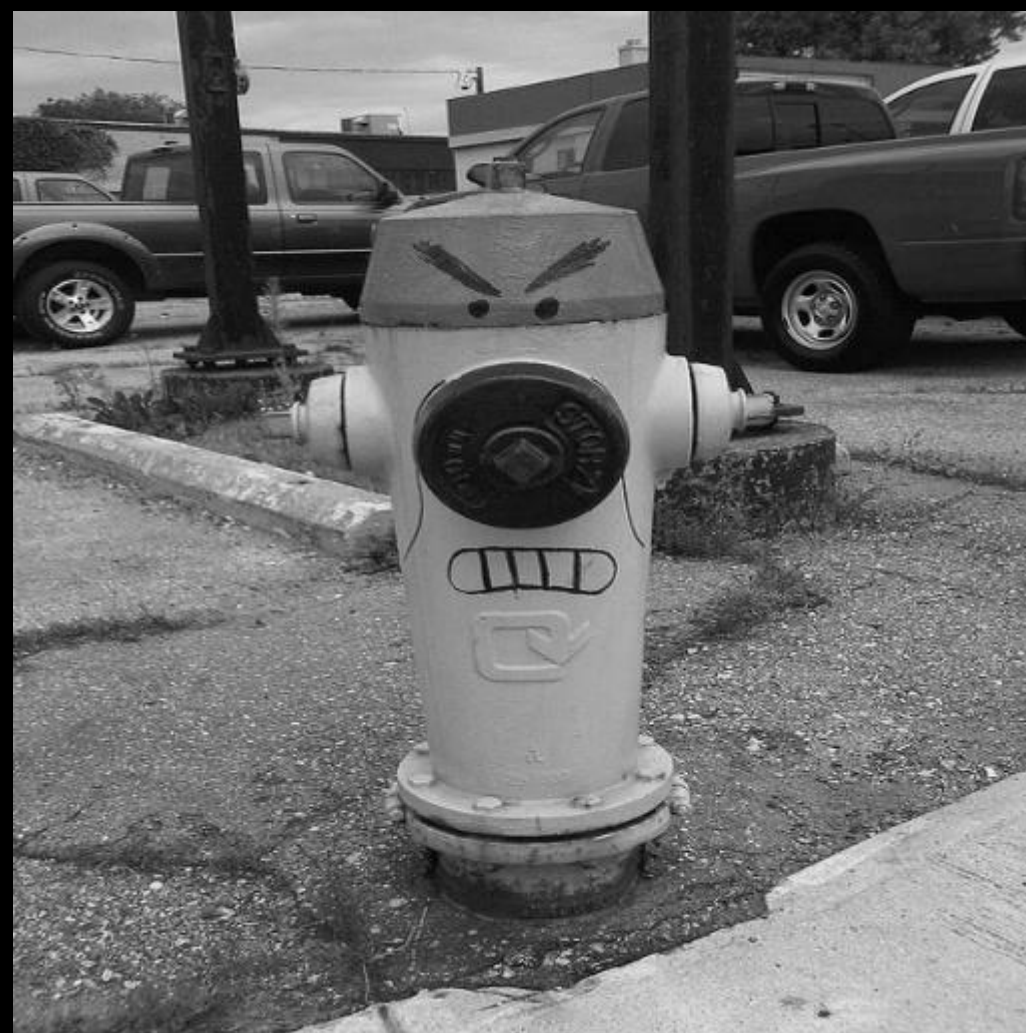

Input

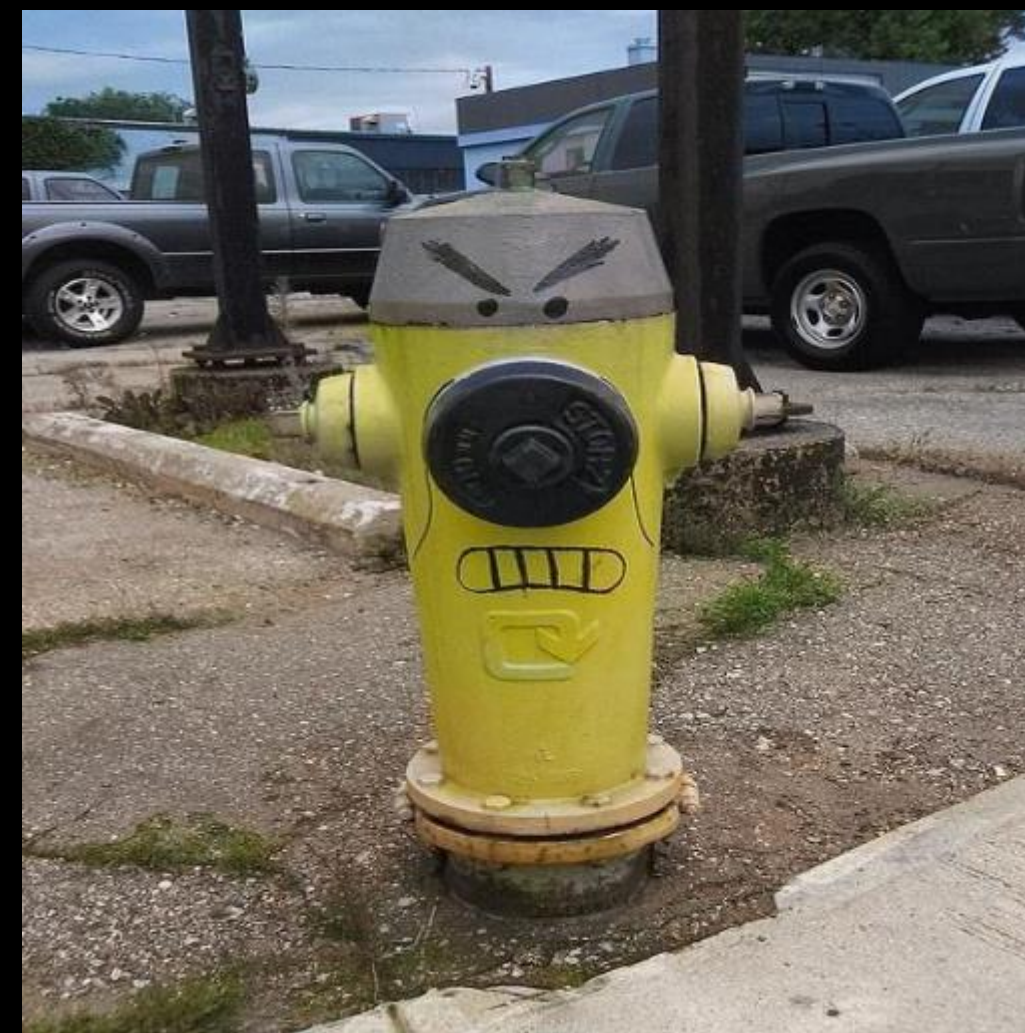

UniColor

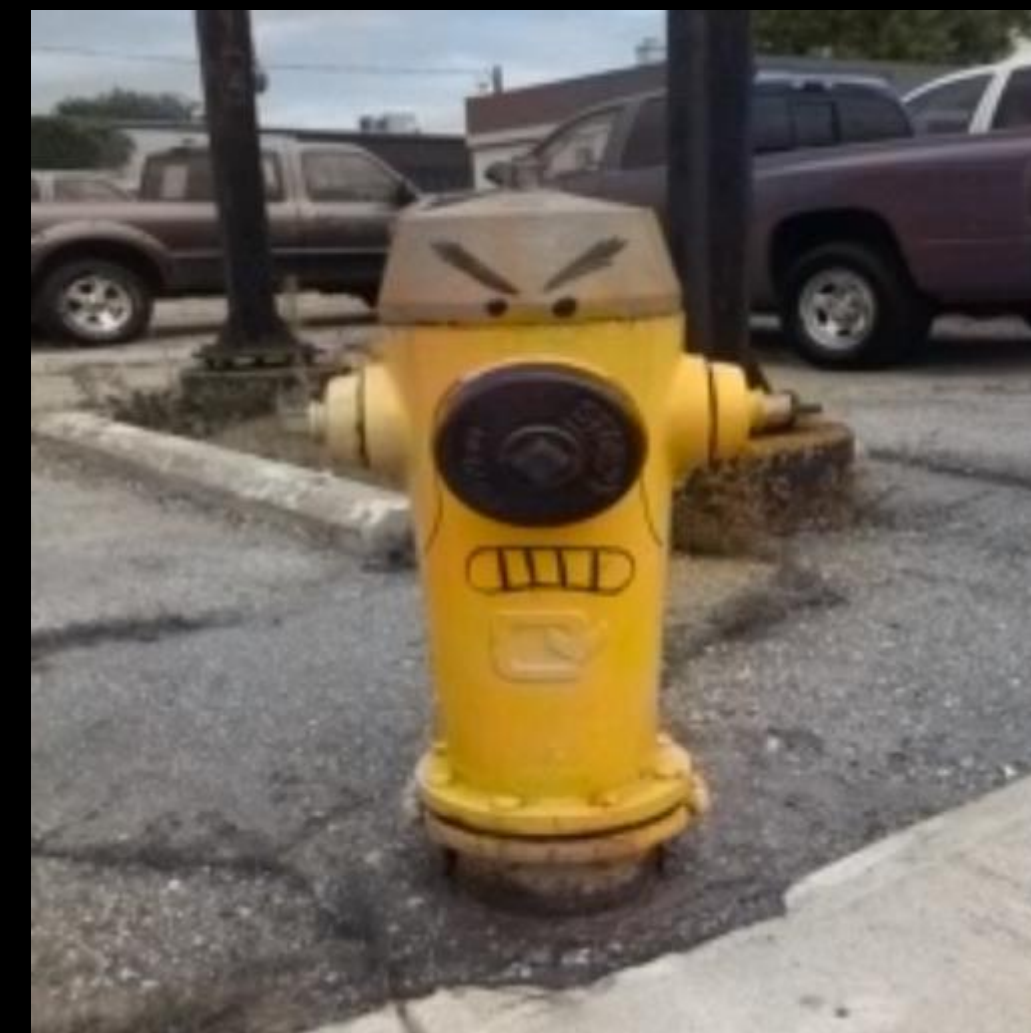

L-CoDe

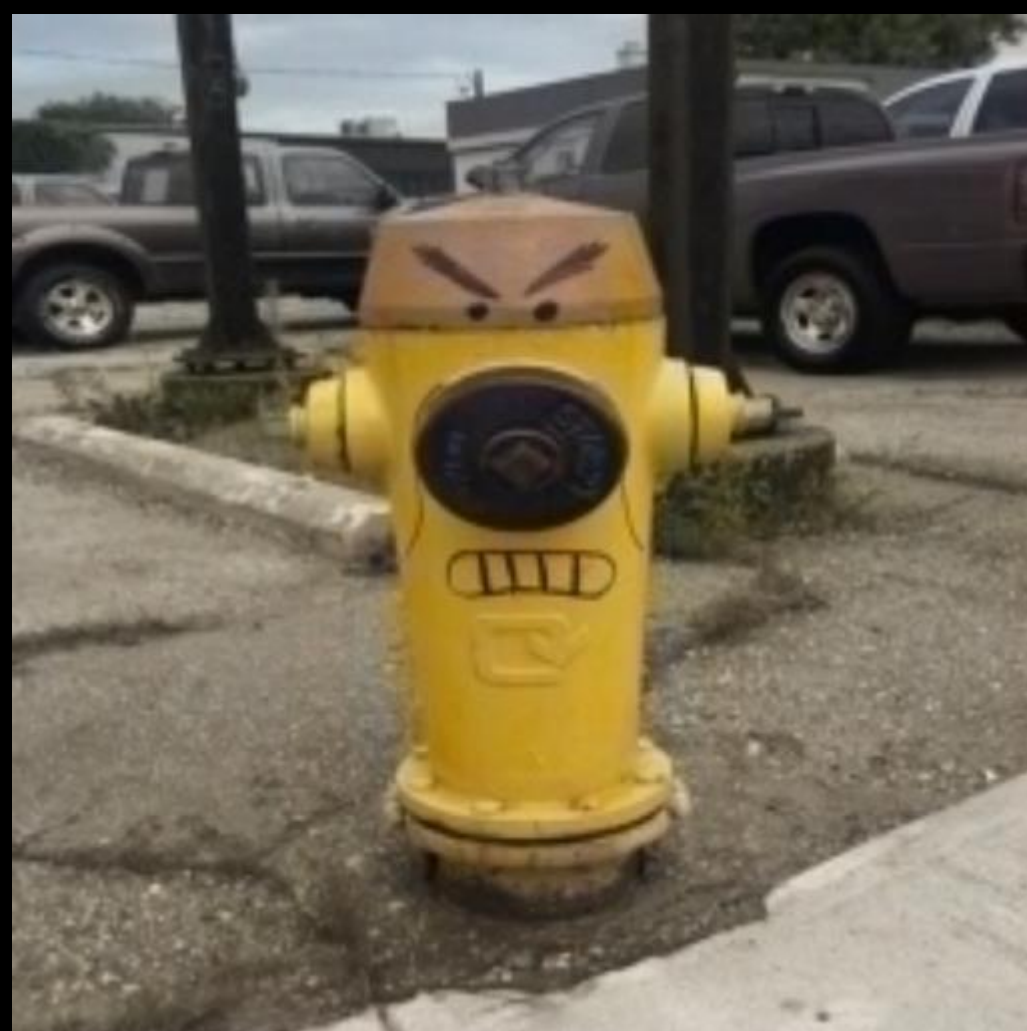

L-CoDer

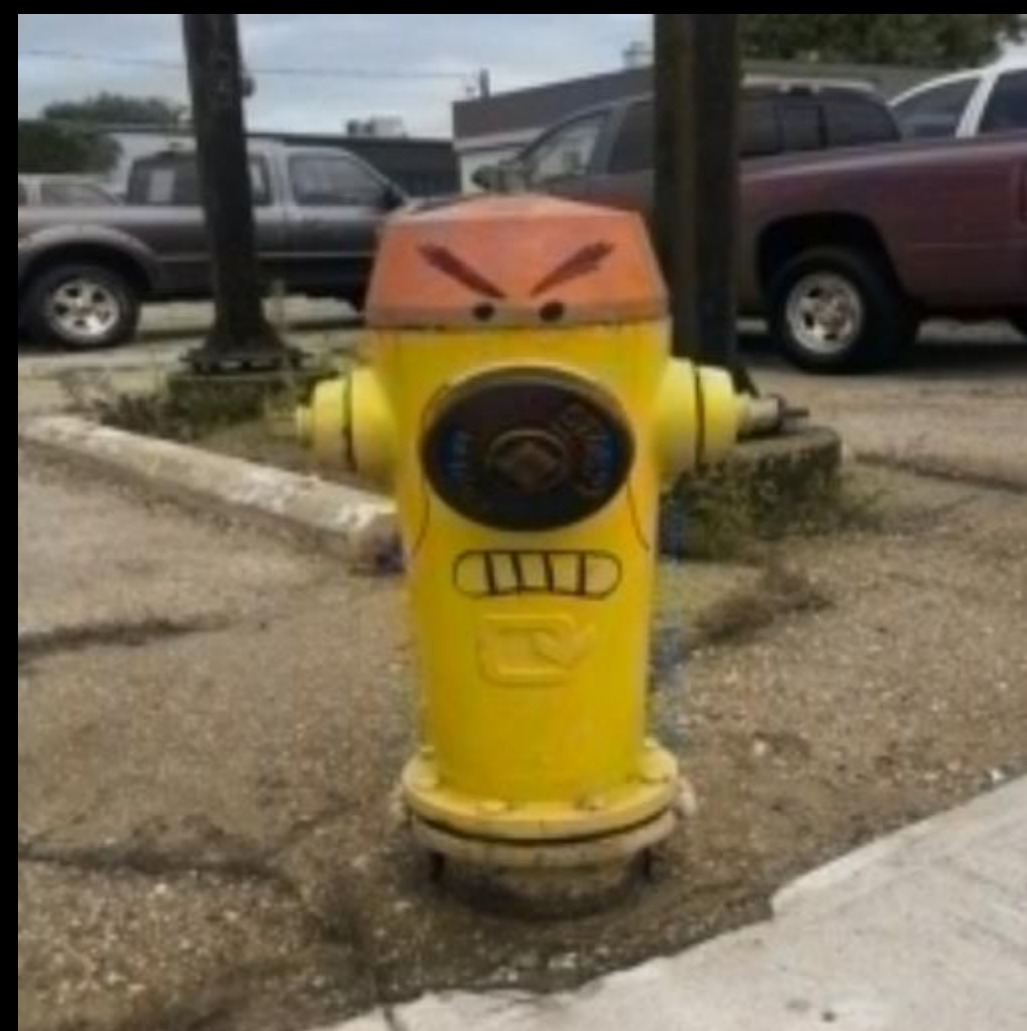

L-CoIns

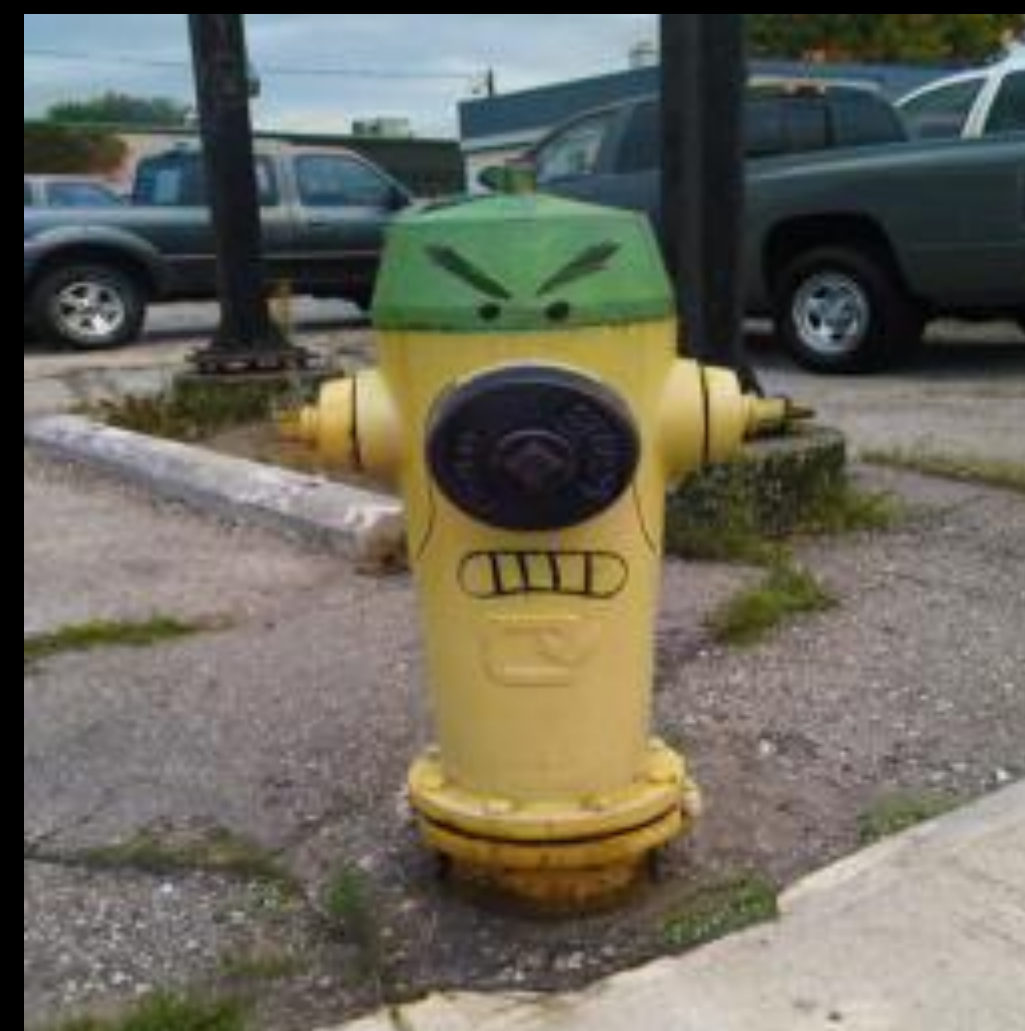

L-CAD

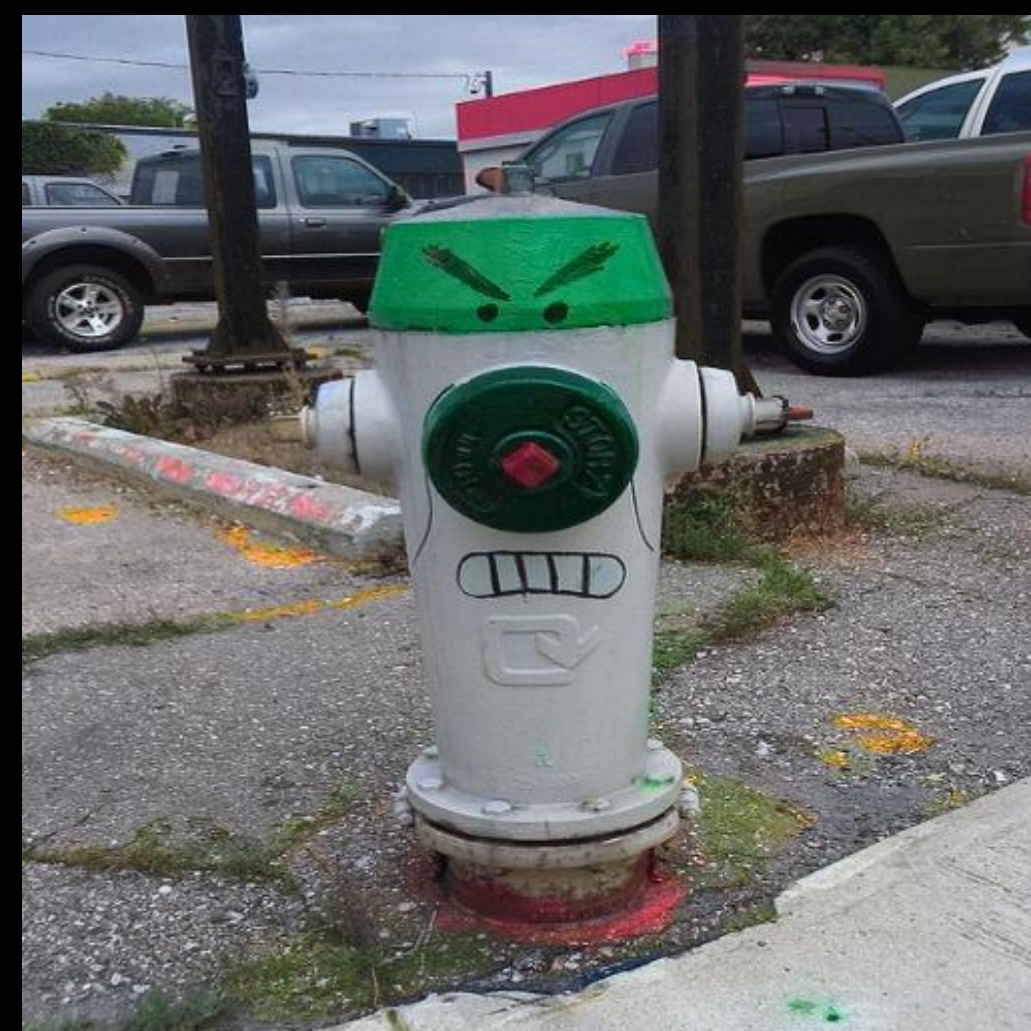

Ours



the white plate  
contains a meat  
sandwich on toast  
garnished with  
lettuce onions and  
tomato

description

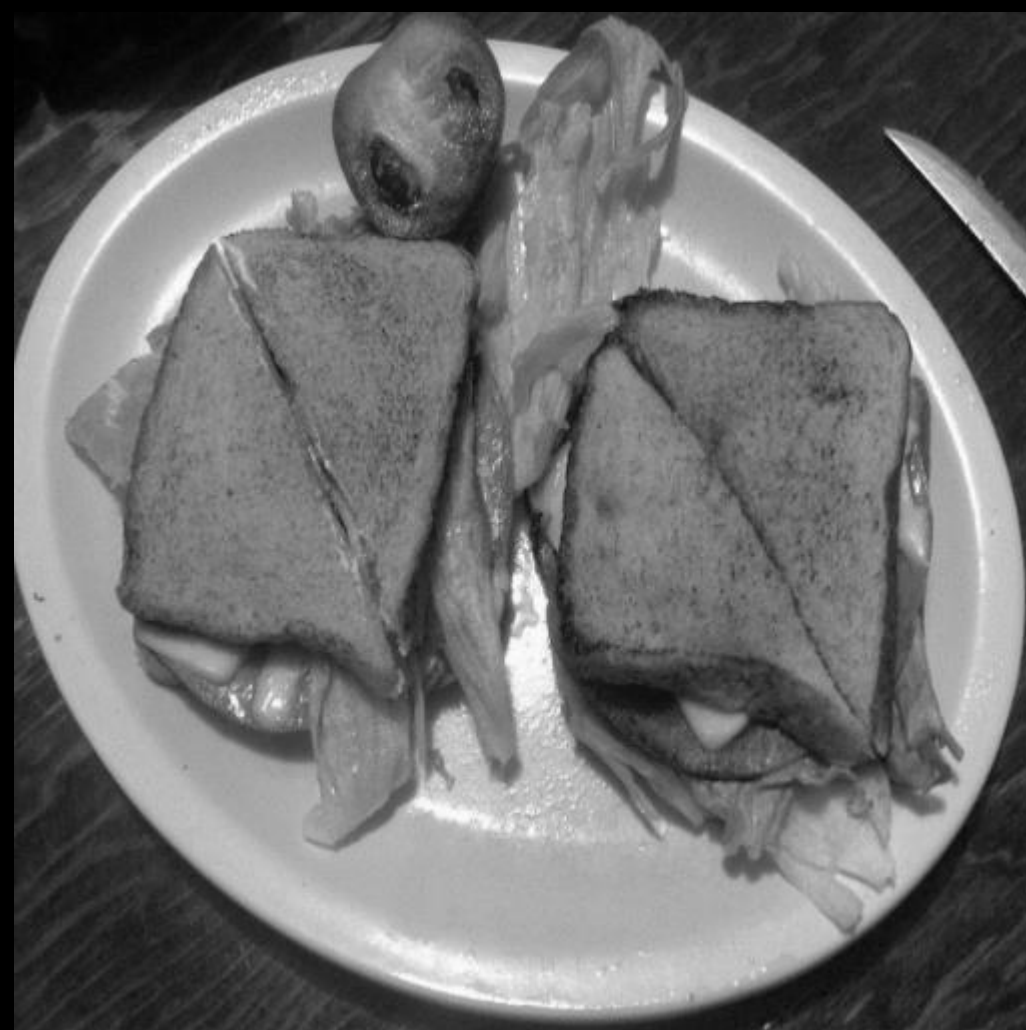

Input

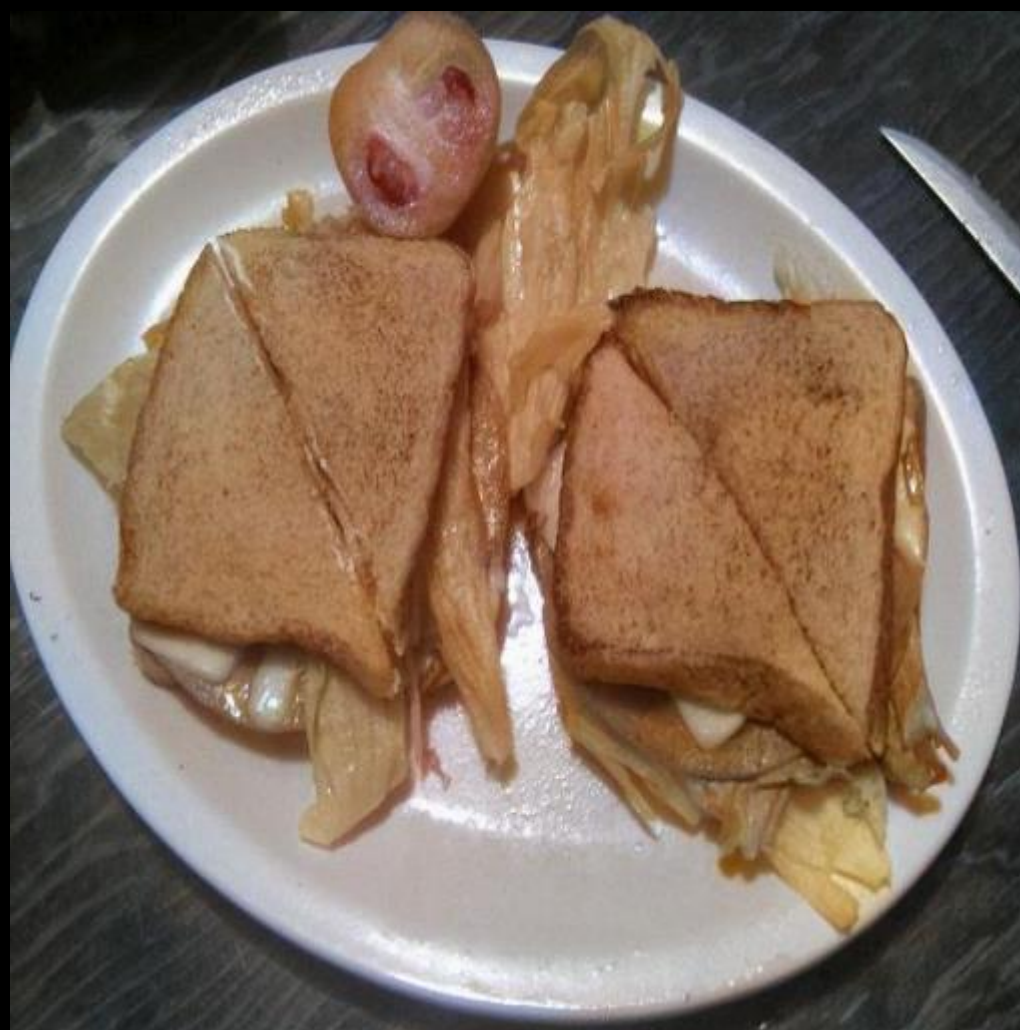

UniColor

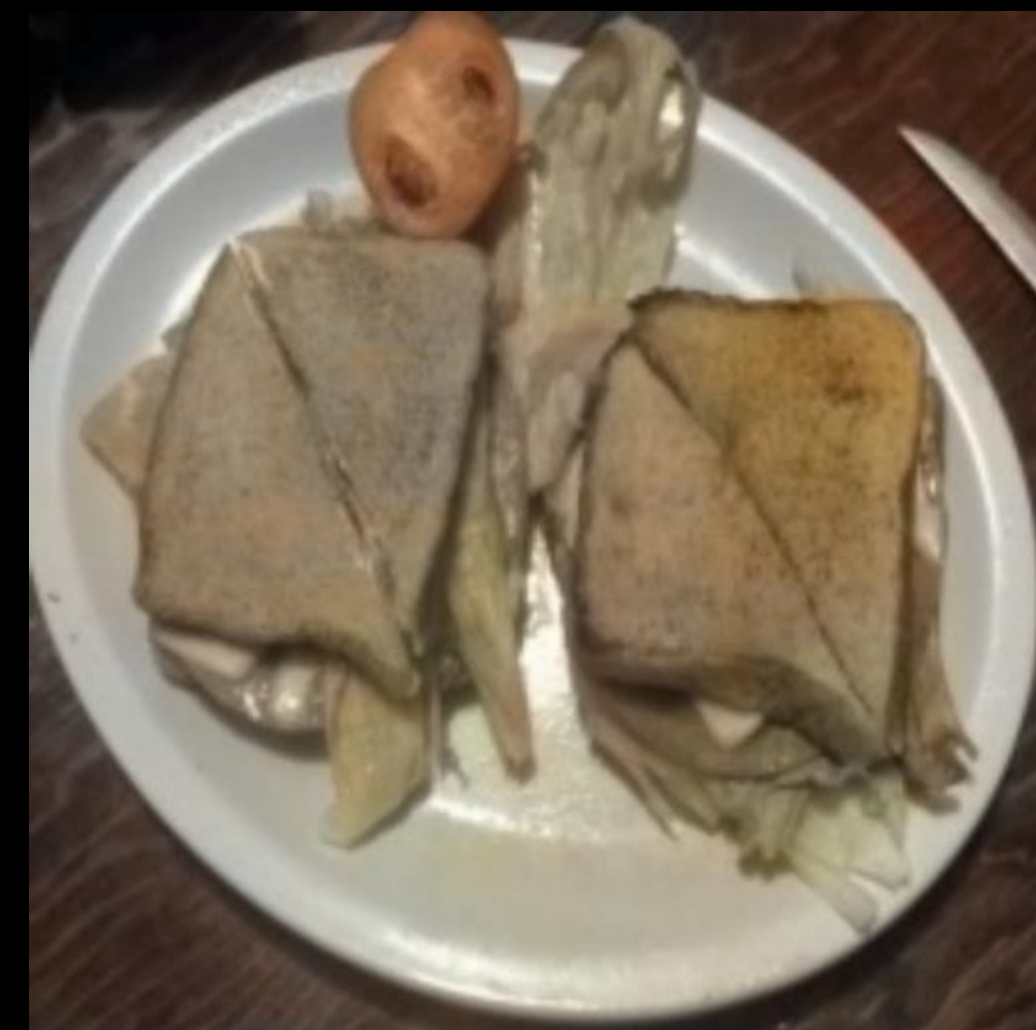

L-CoDe

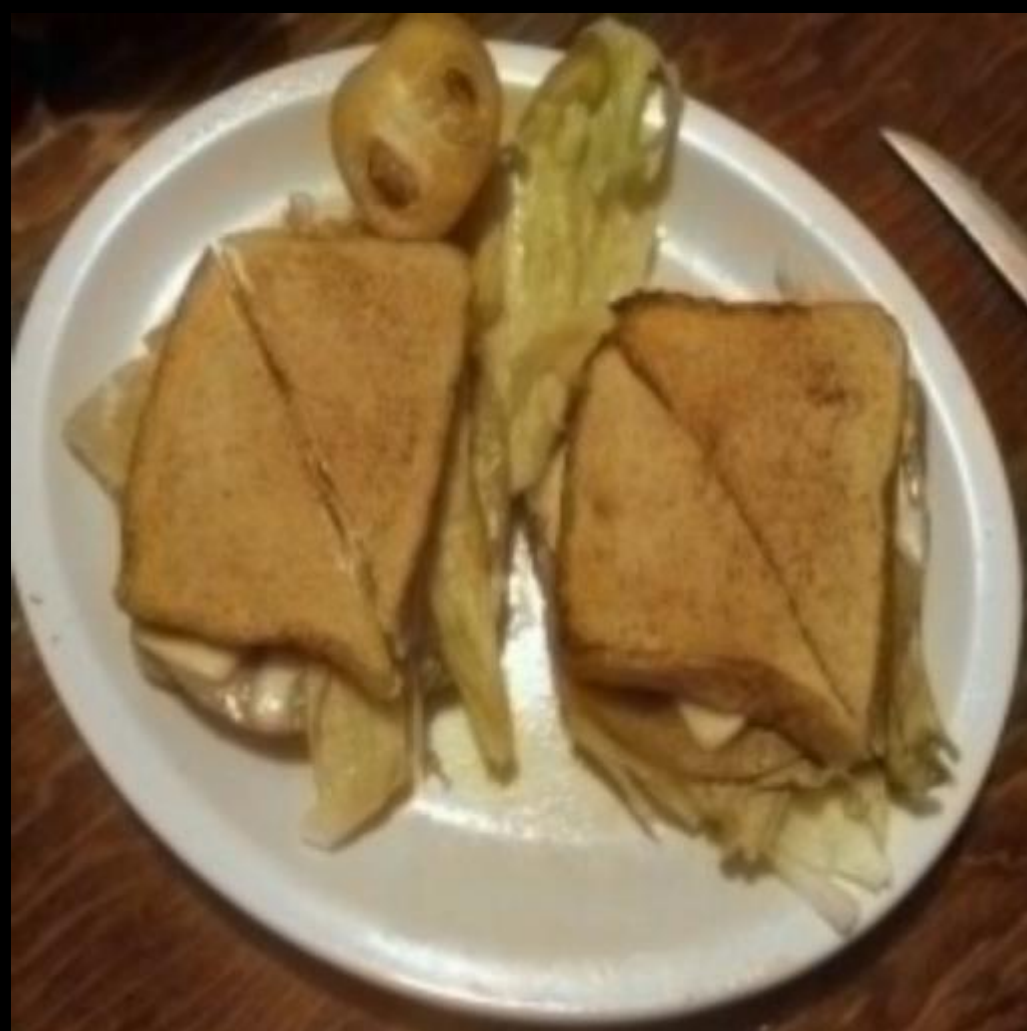

L-CoDer

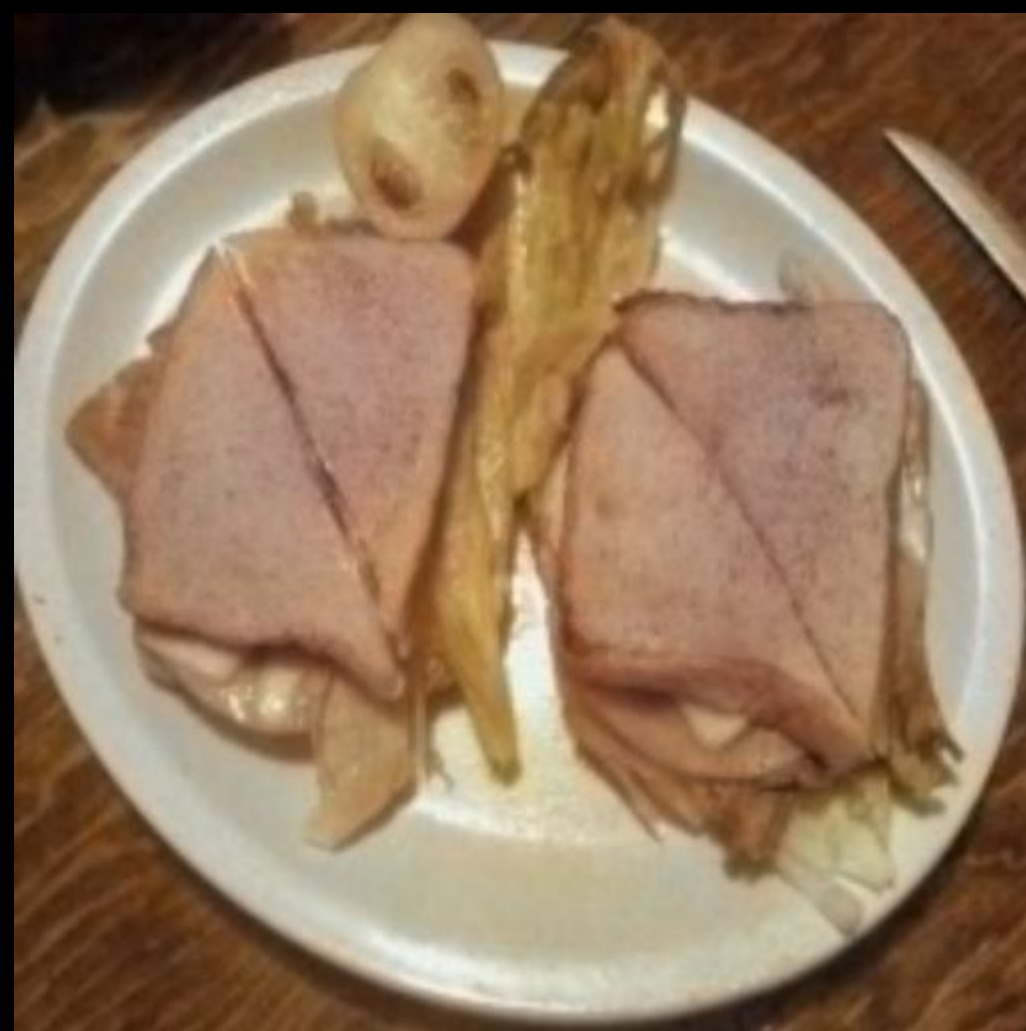

L-CoIns

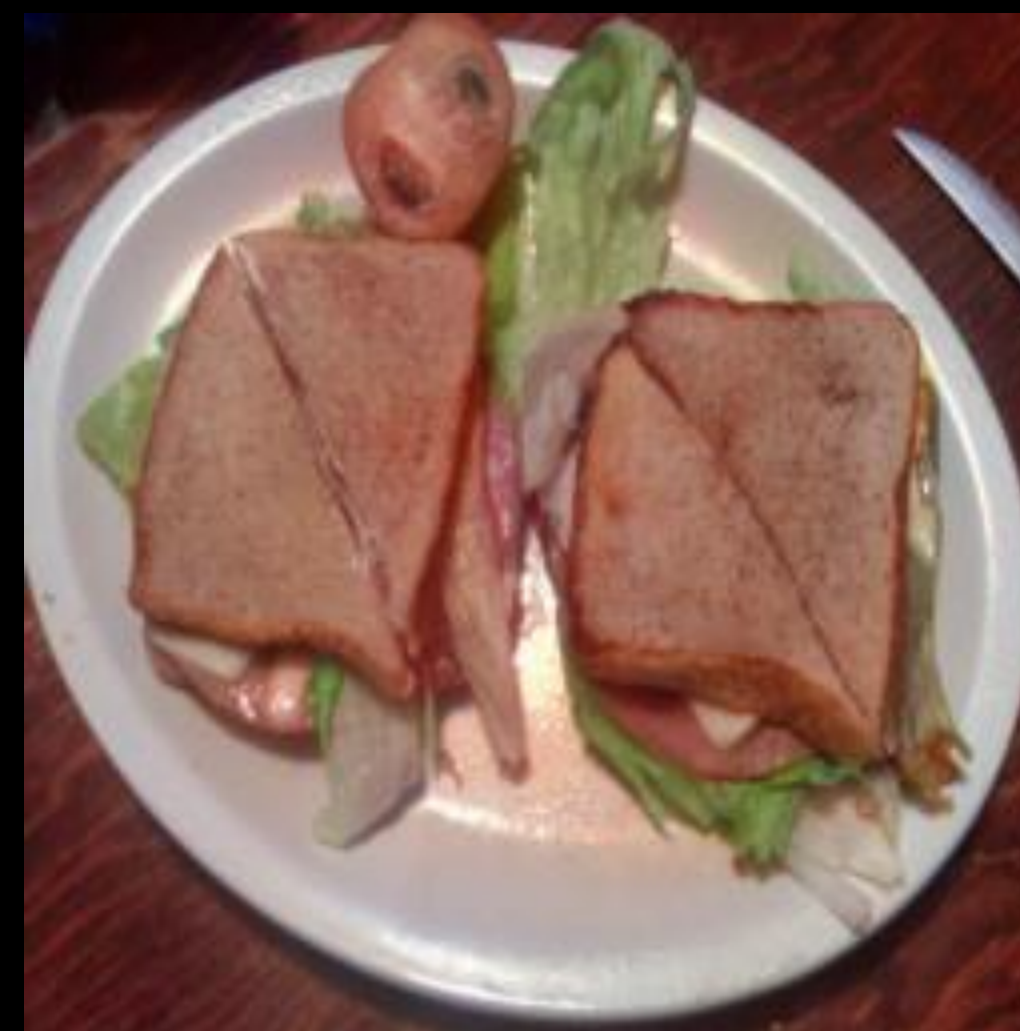

L-CAD

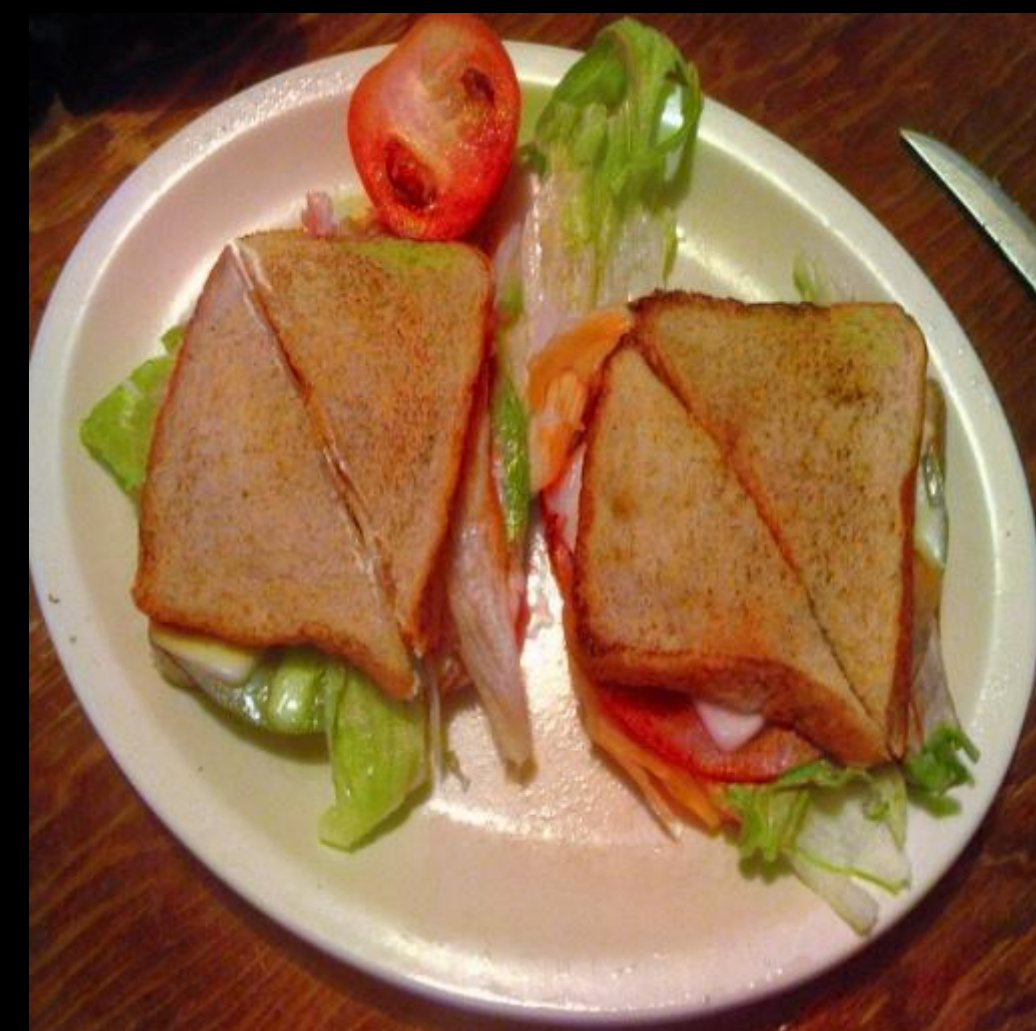

Ours



a white bowl that  
includes carrots and  
broccoli

description

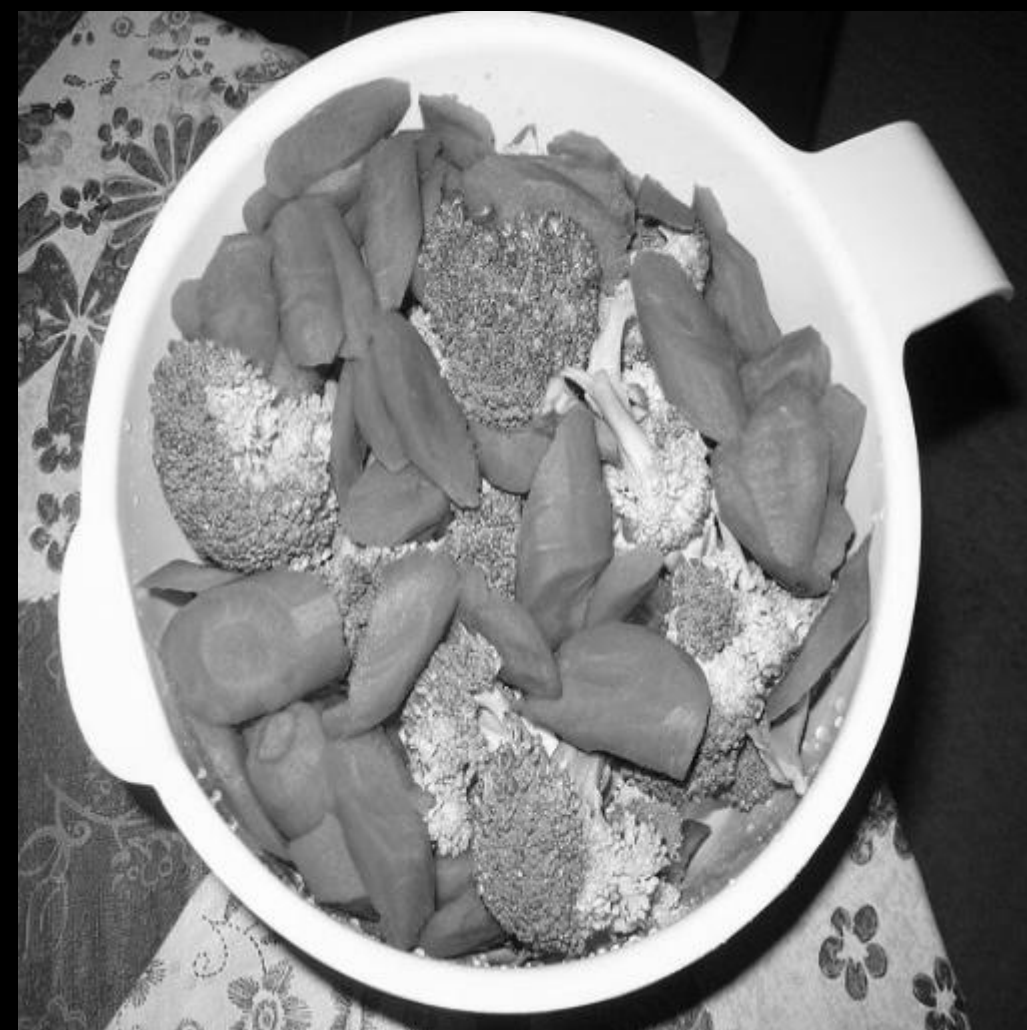

Input

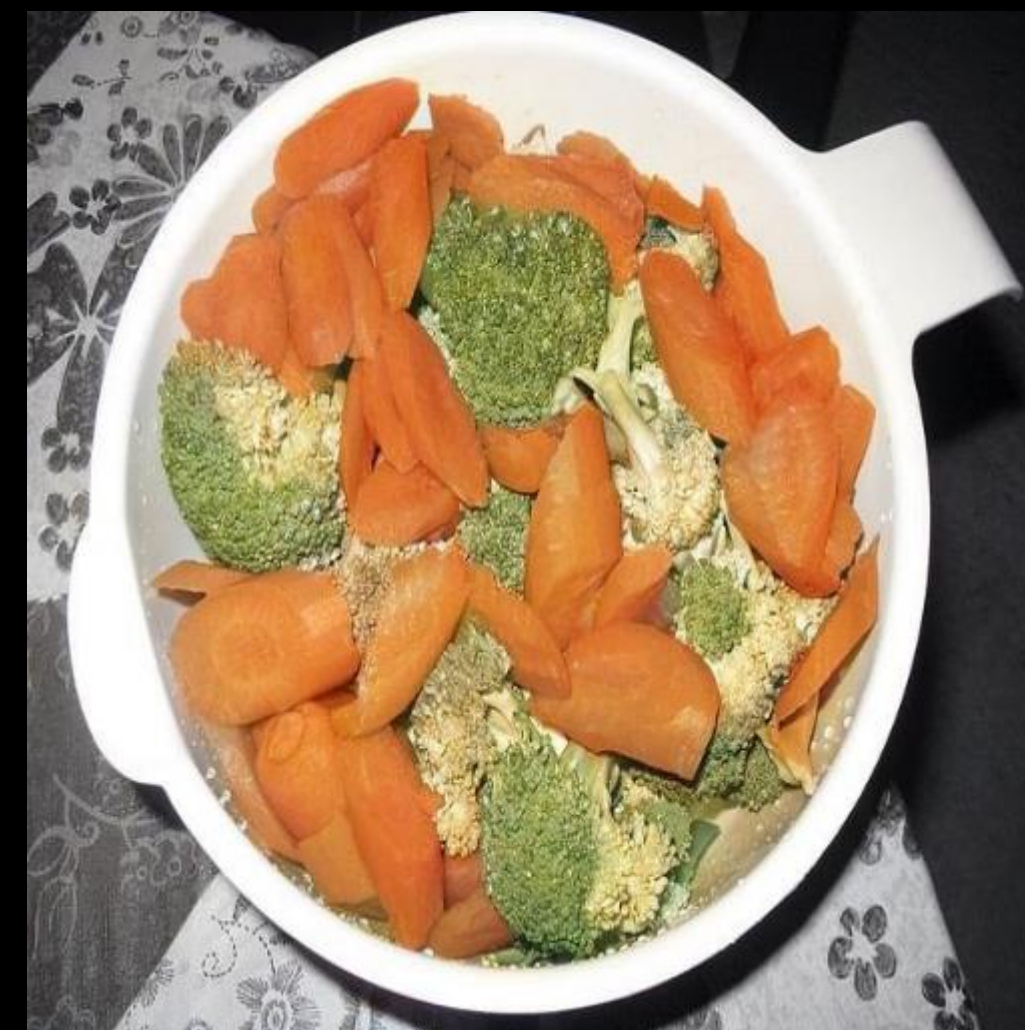

UniColor

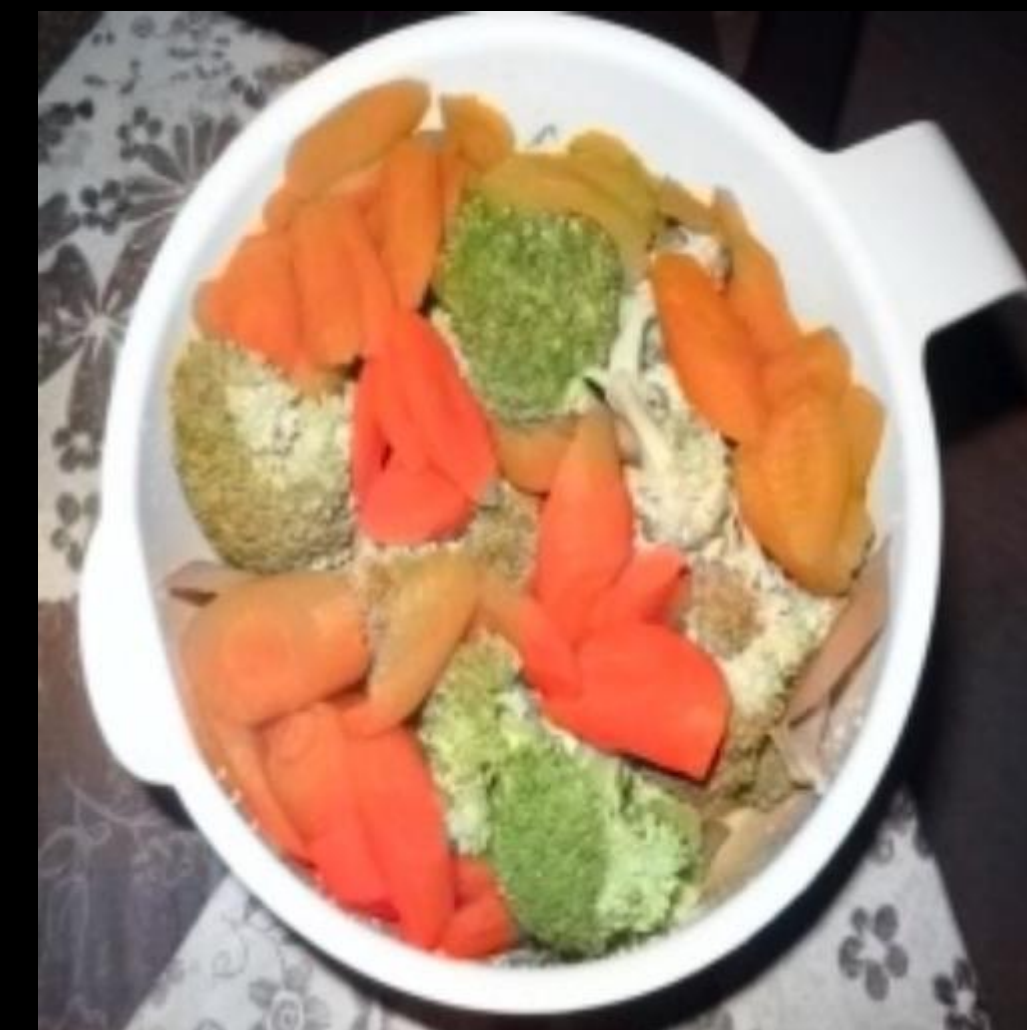

L-CoDe

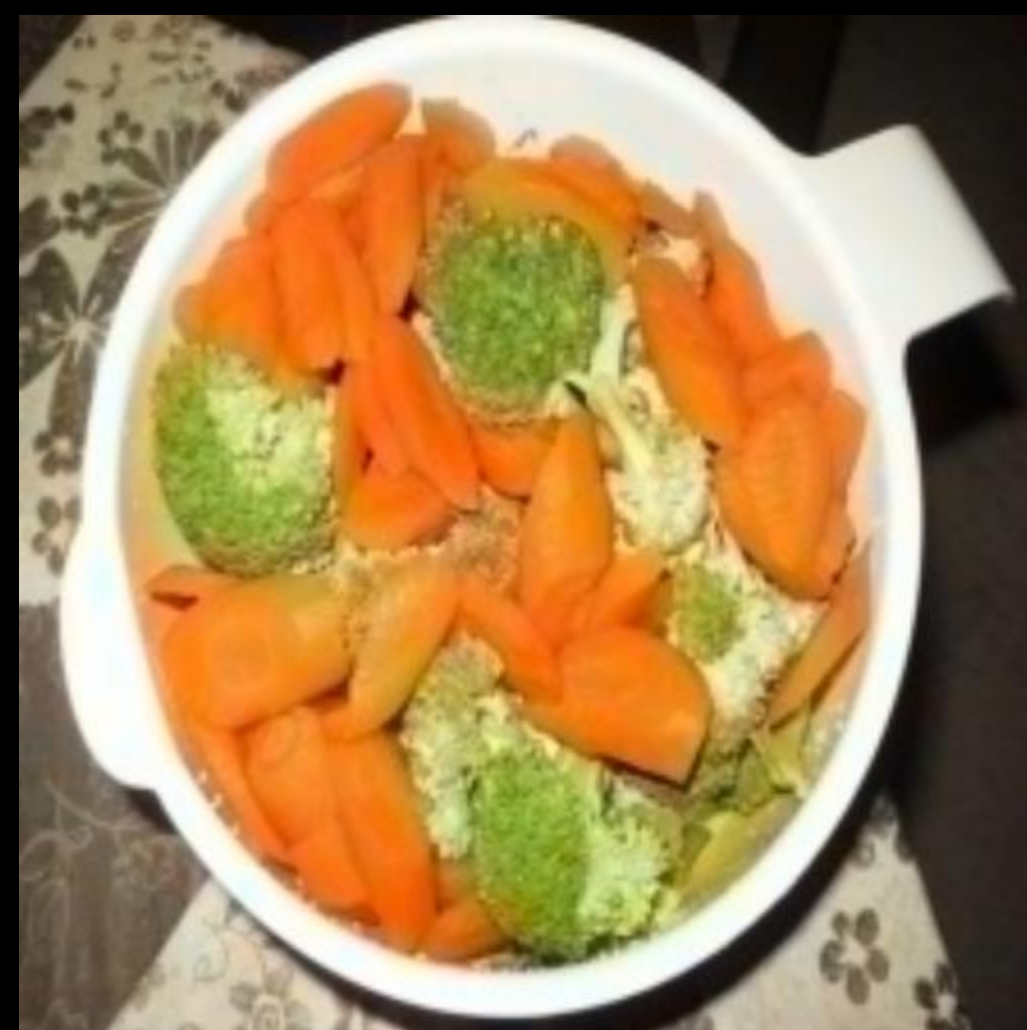

L-CoDer

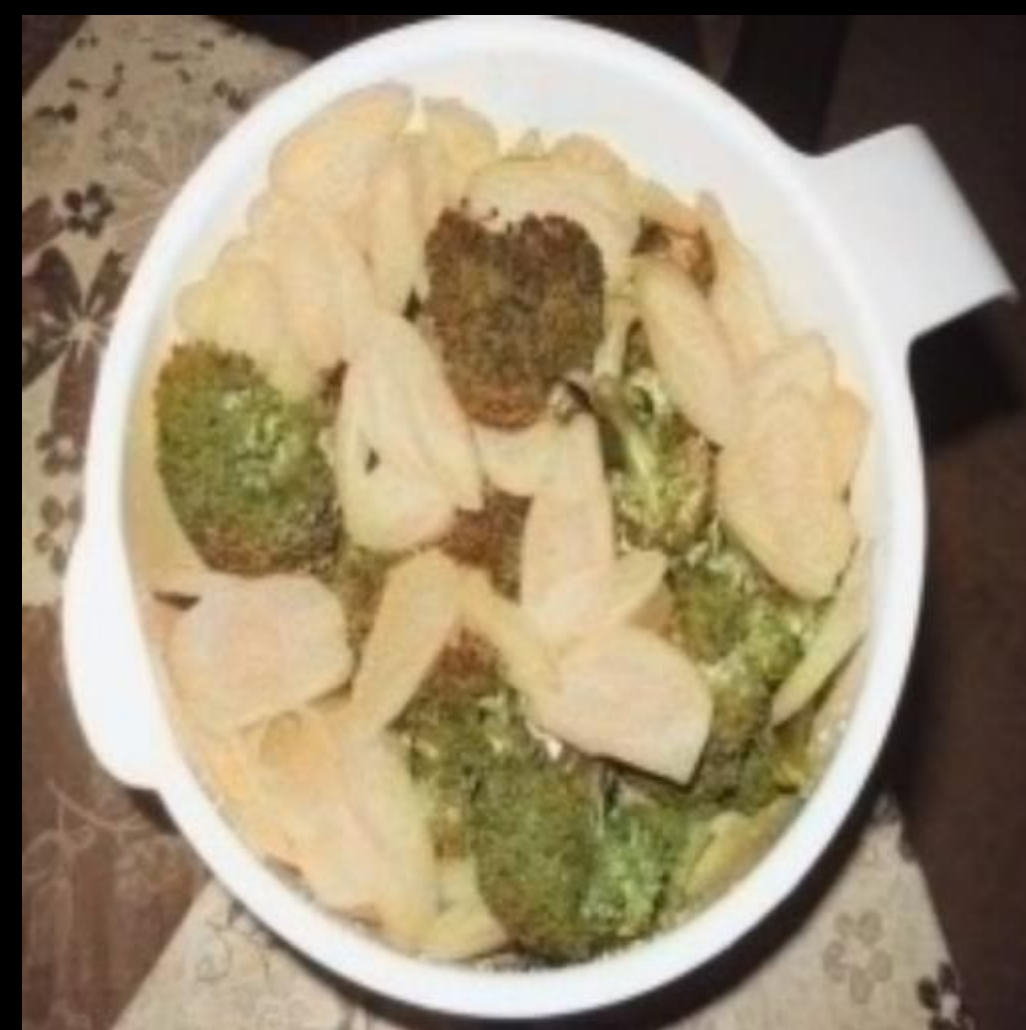

L-CoIns

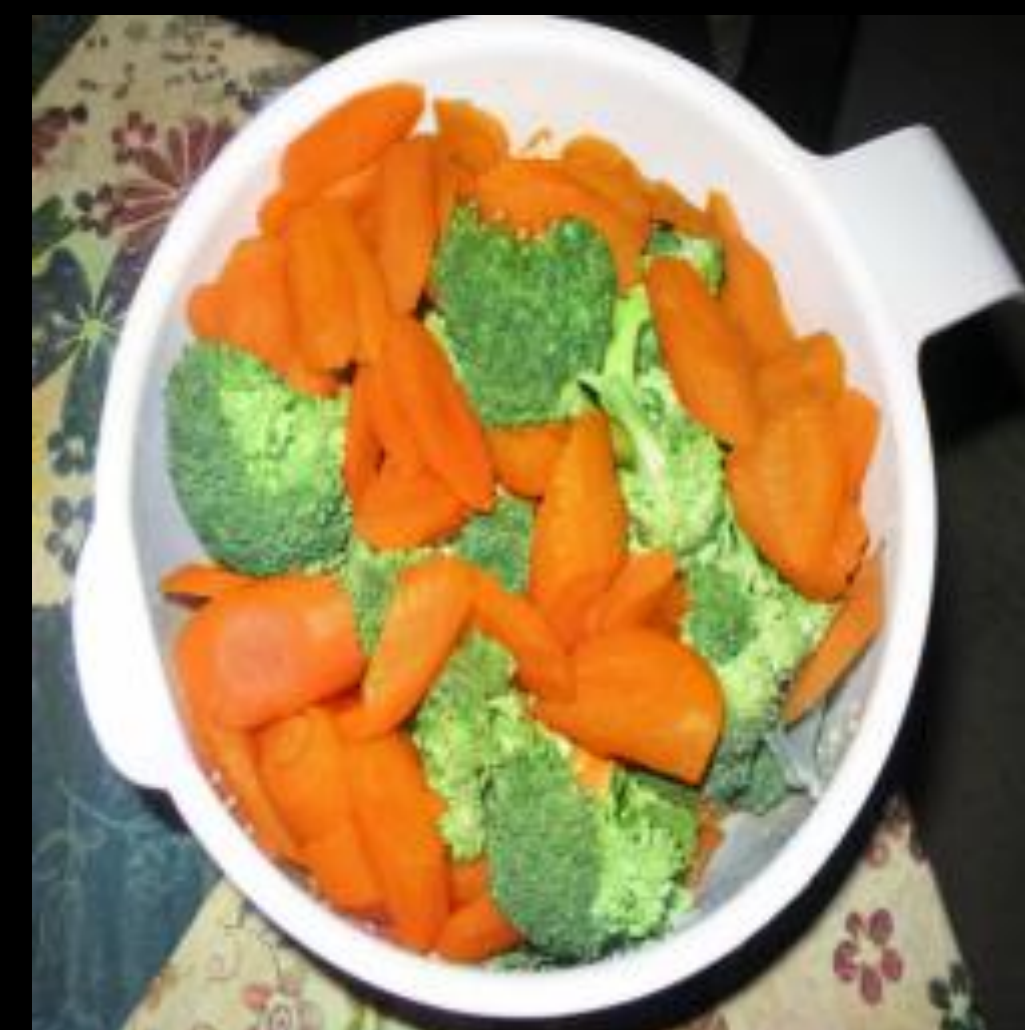

L-CAD

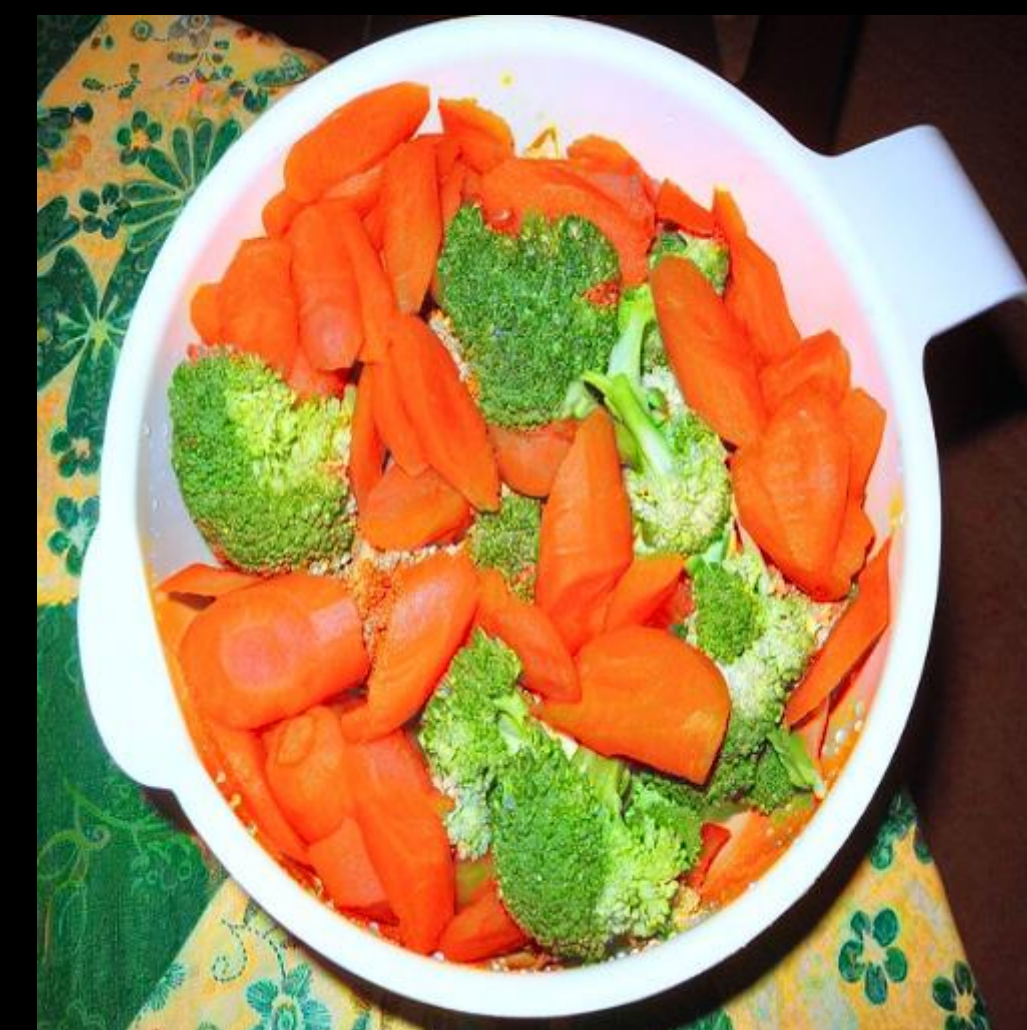

Ours



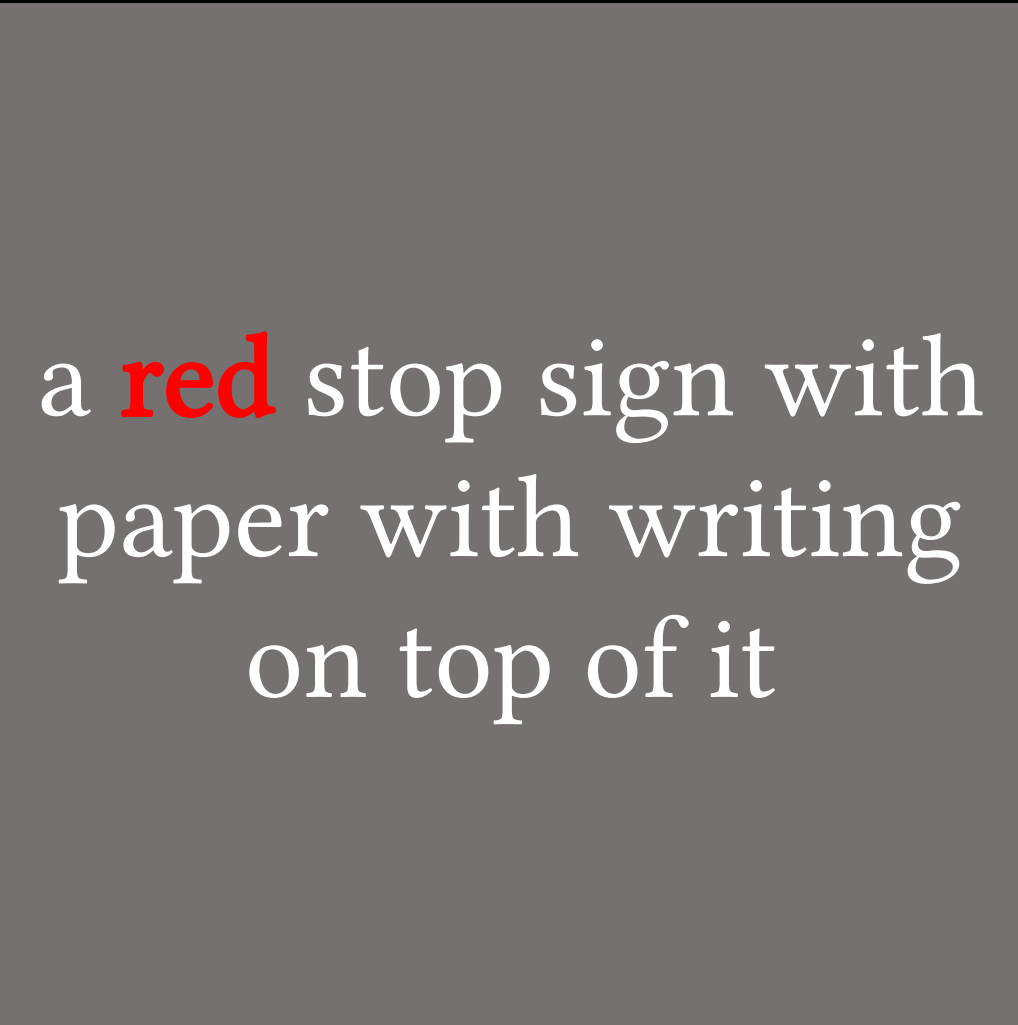

description

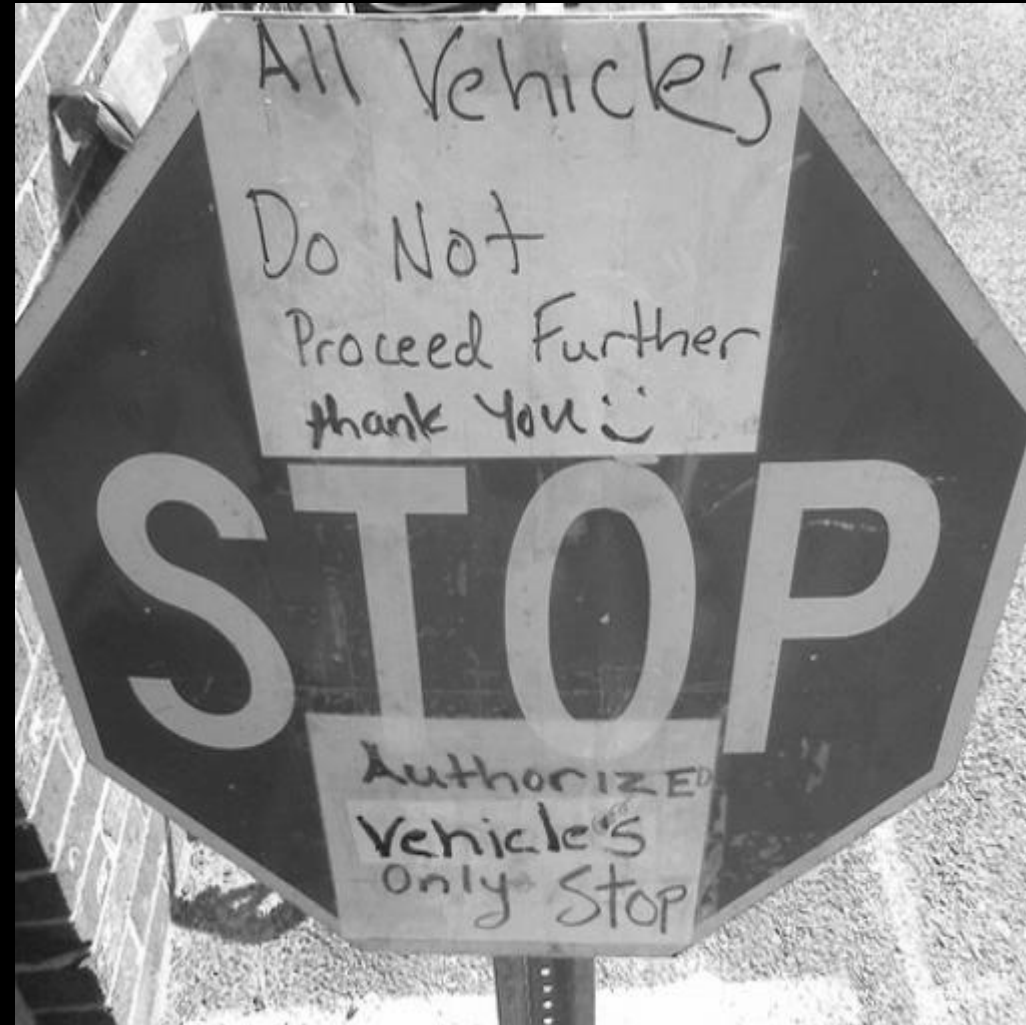

Input

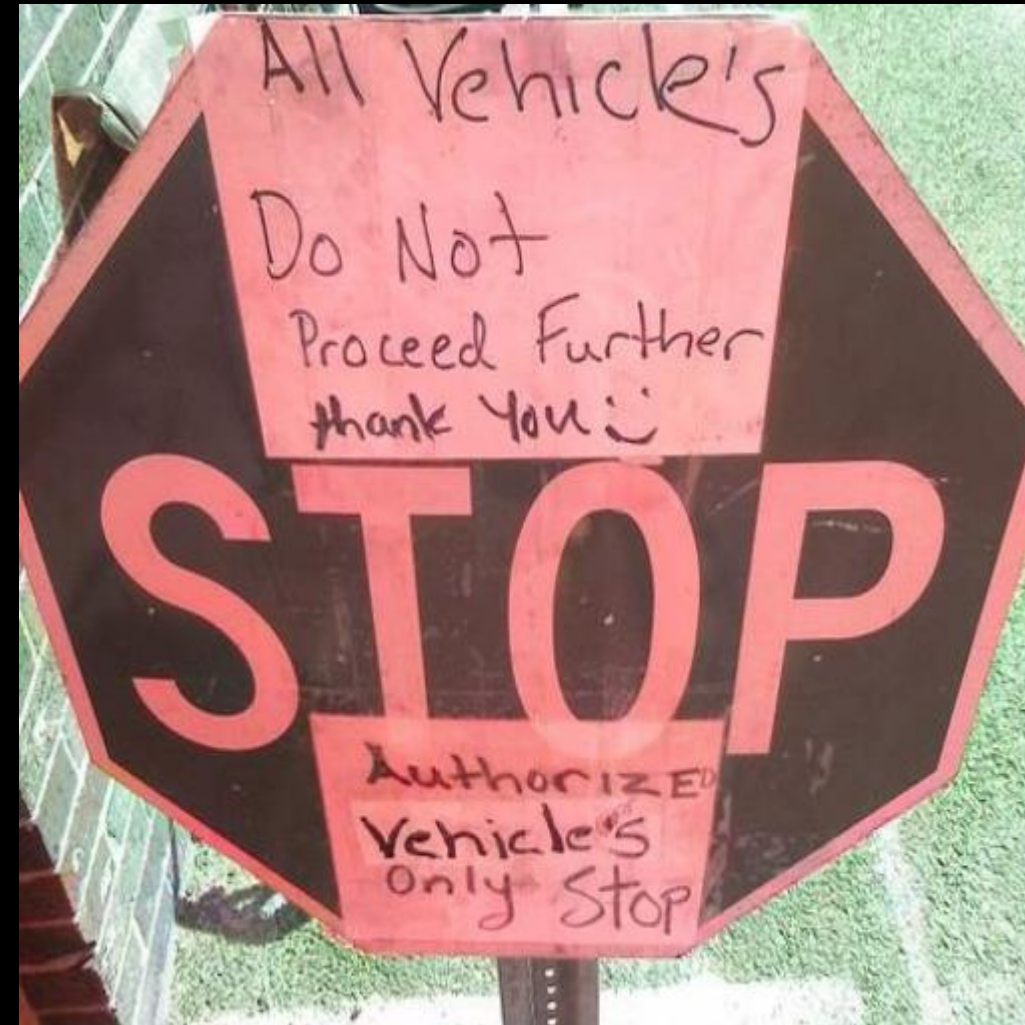

UniColor

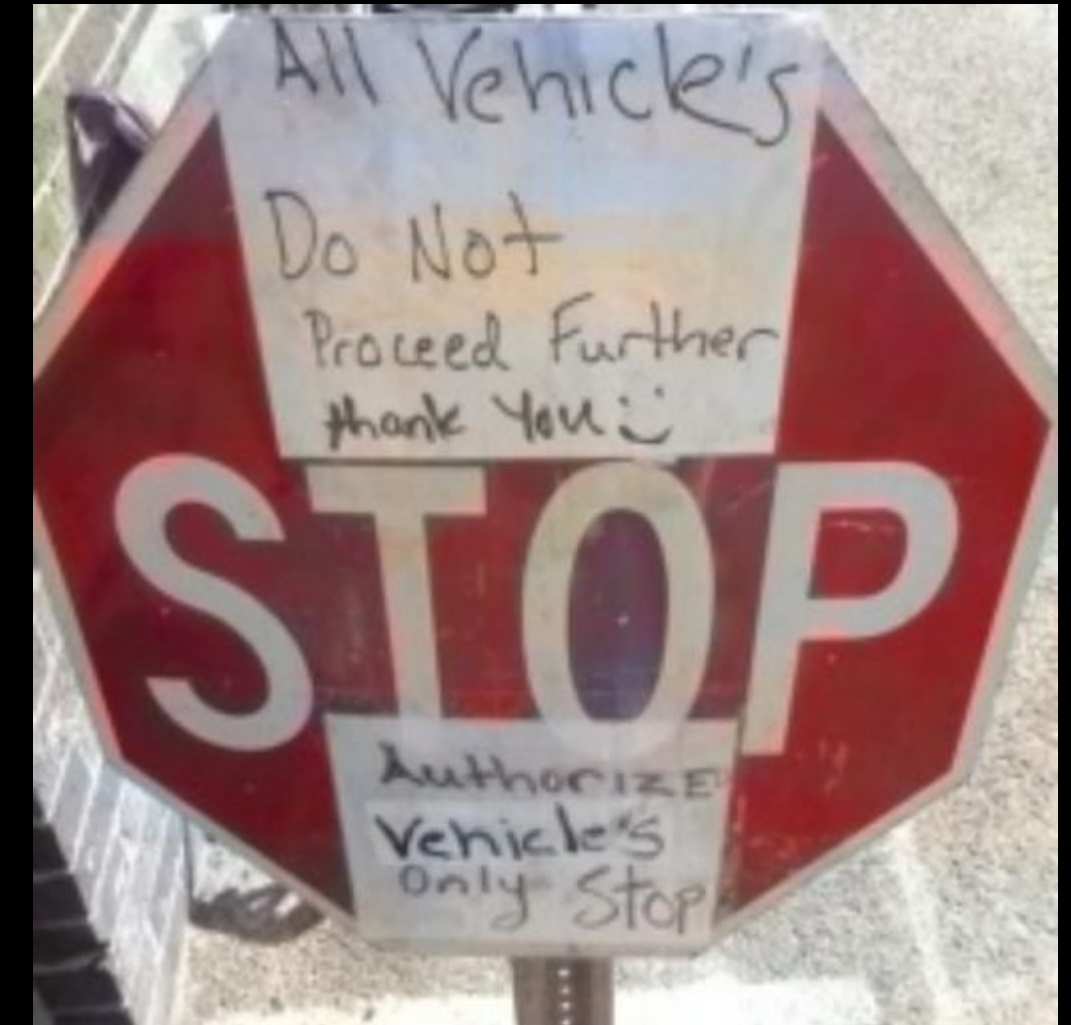

L-CoDe

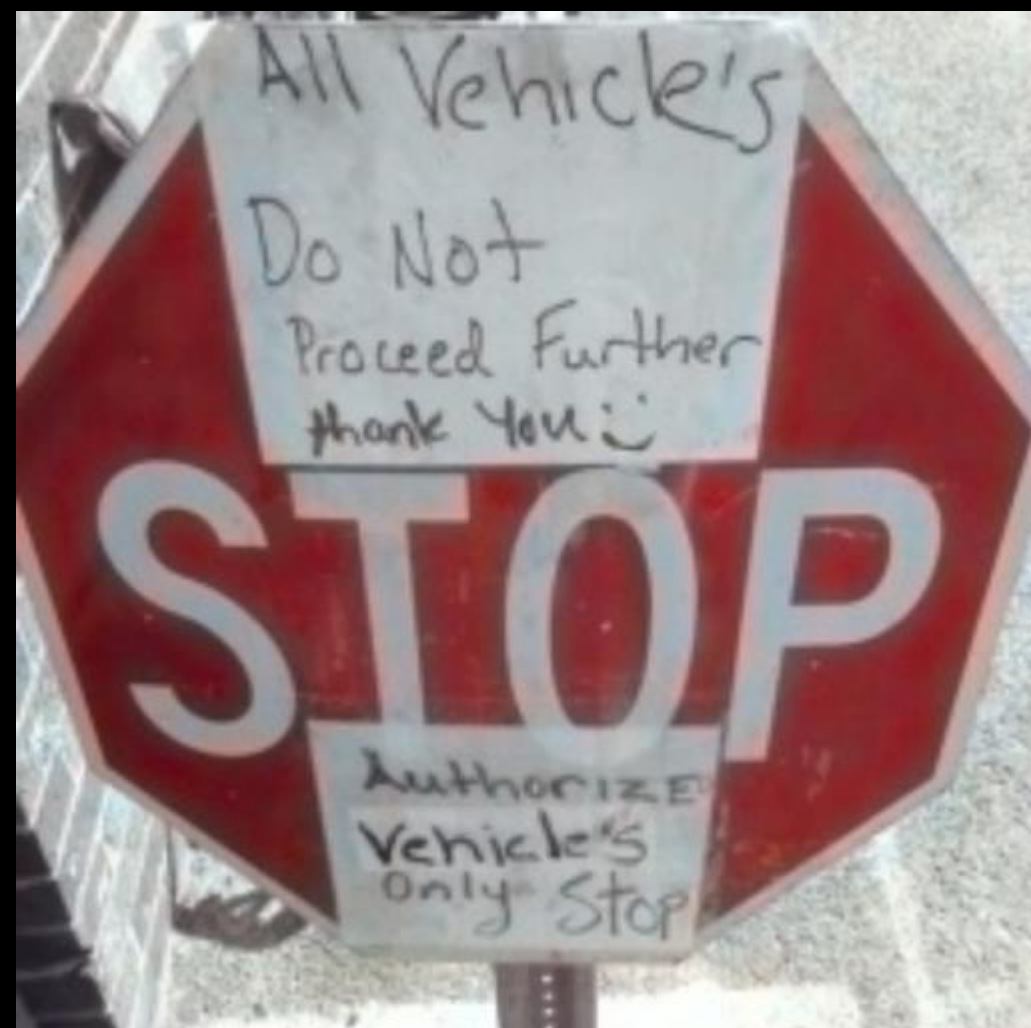

L-CoDer

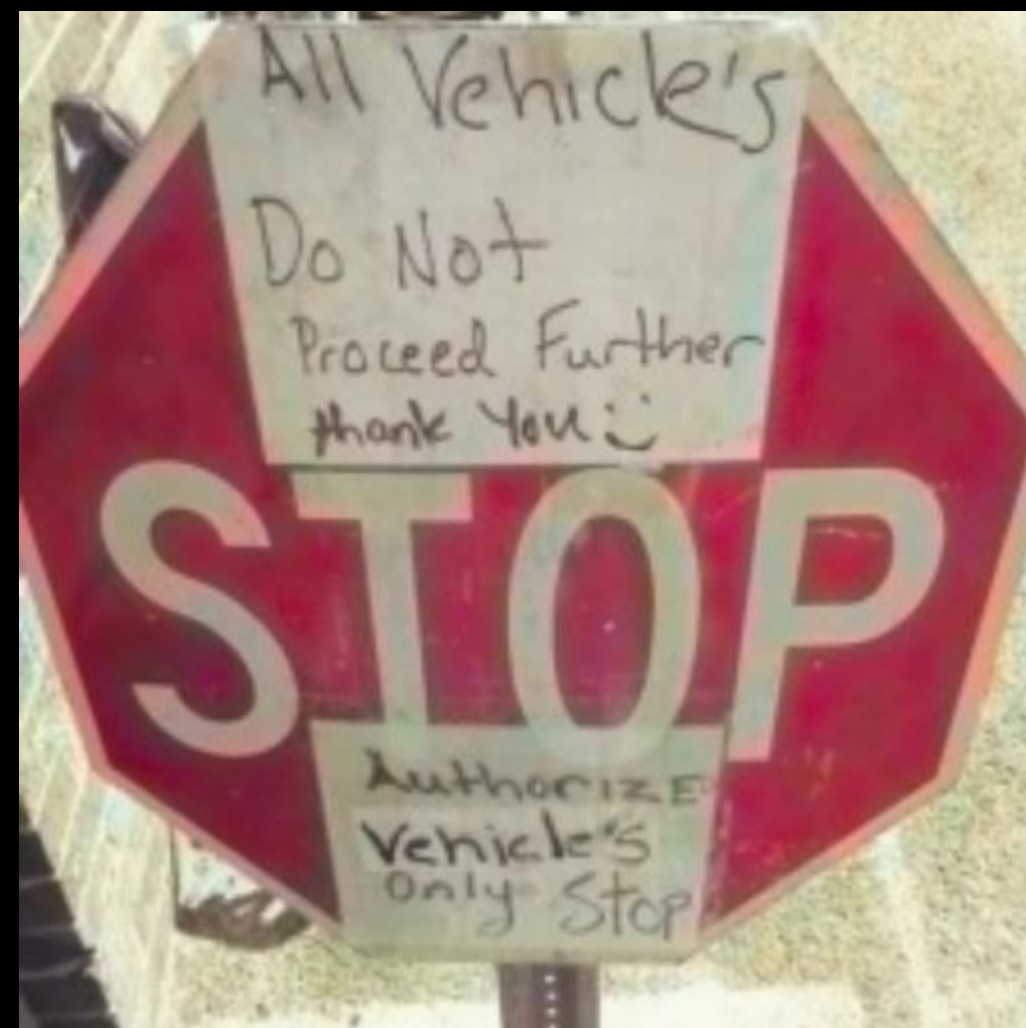

L-CoIns

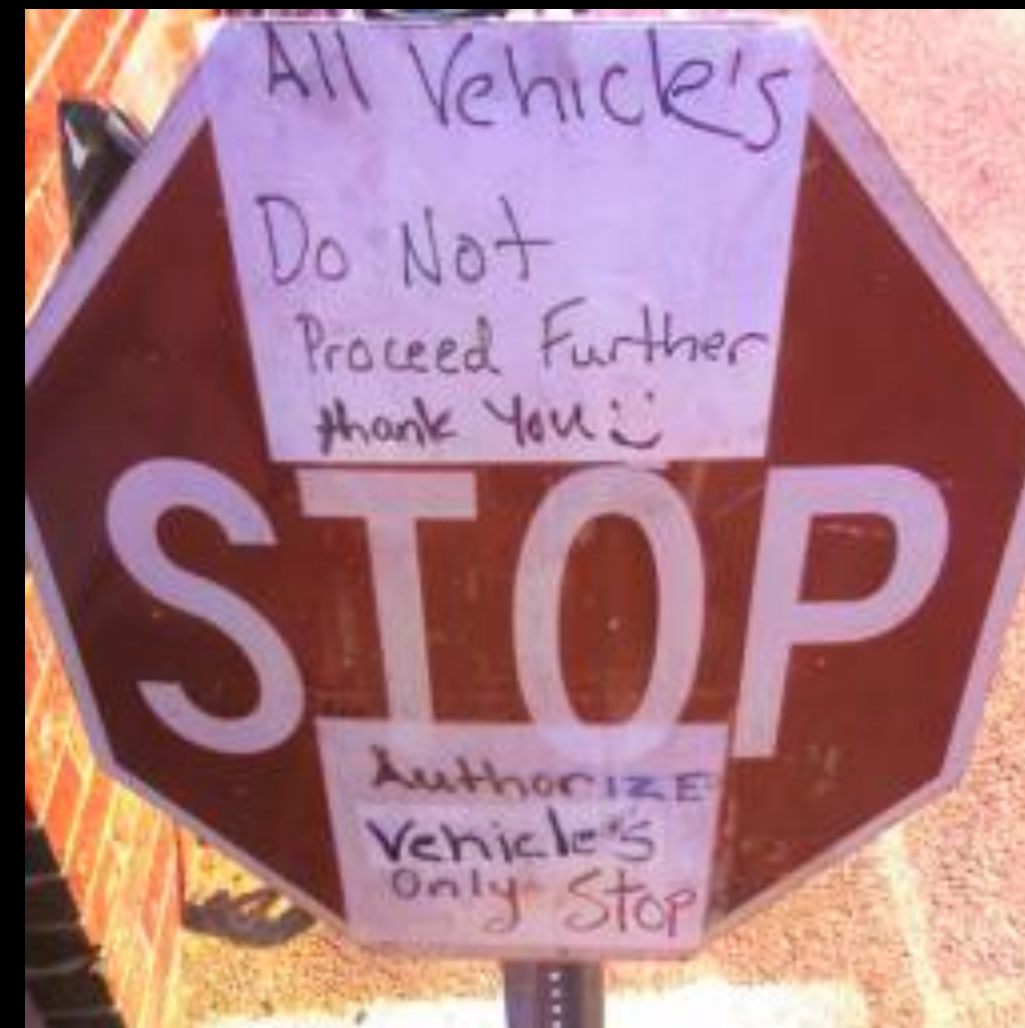

L-CAD

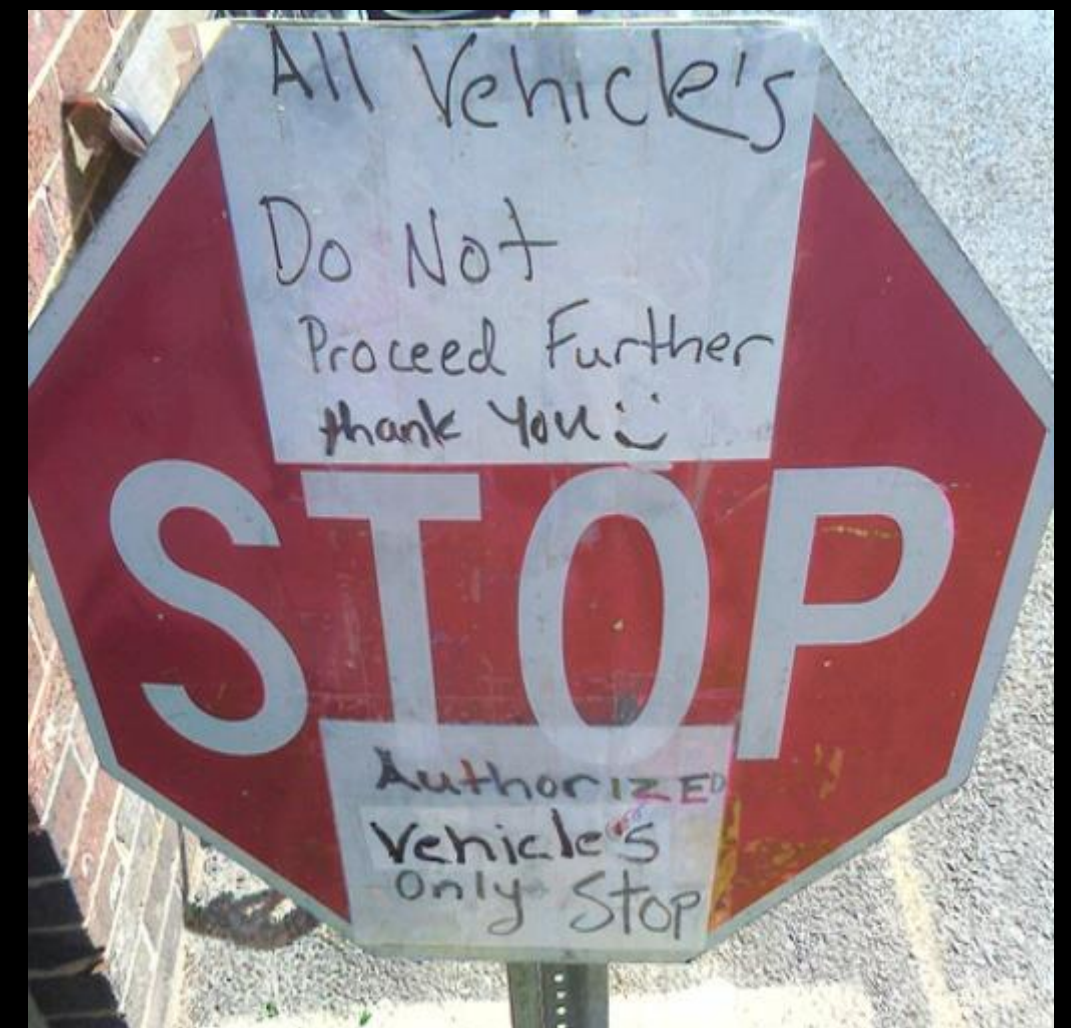

Ours



a large blue sign is  
next to a building

description

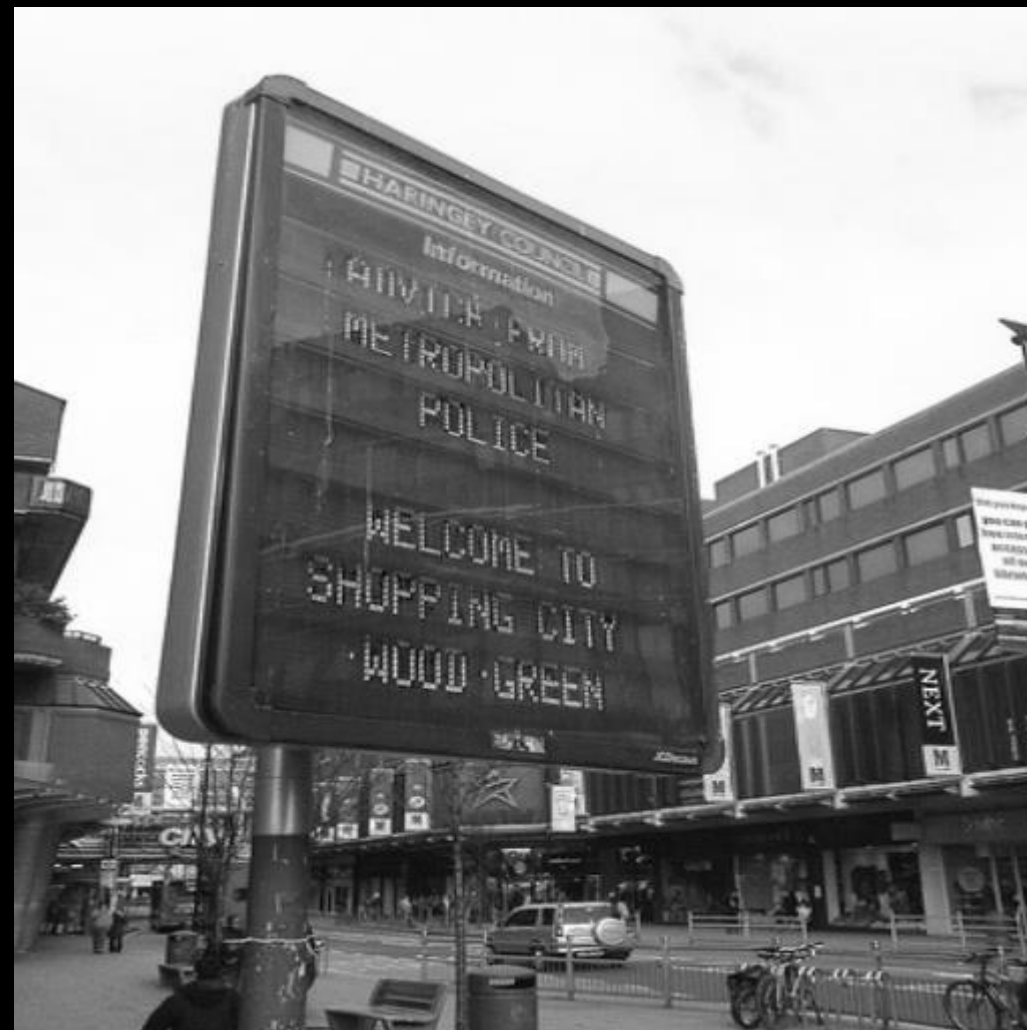

Input

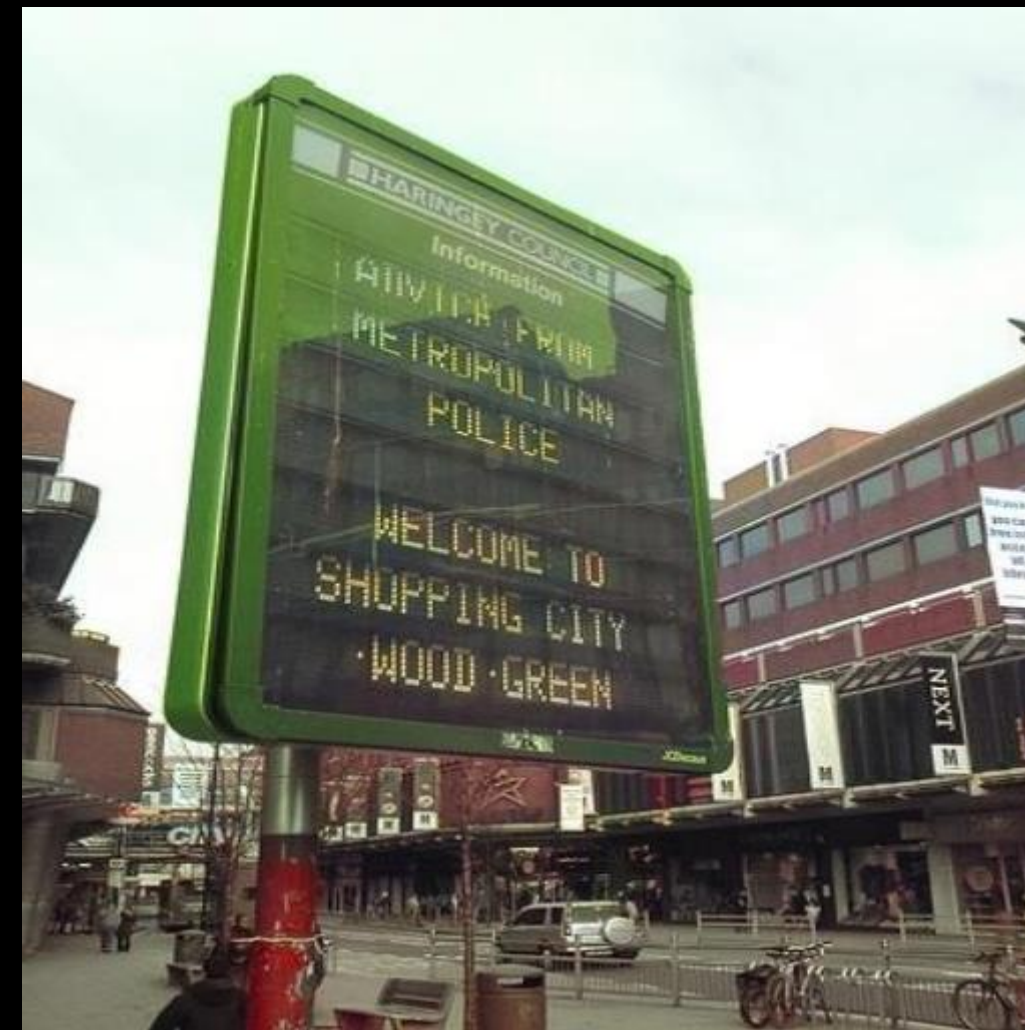

UniColor

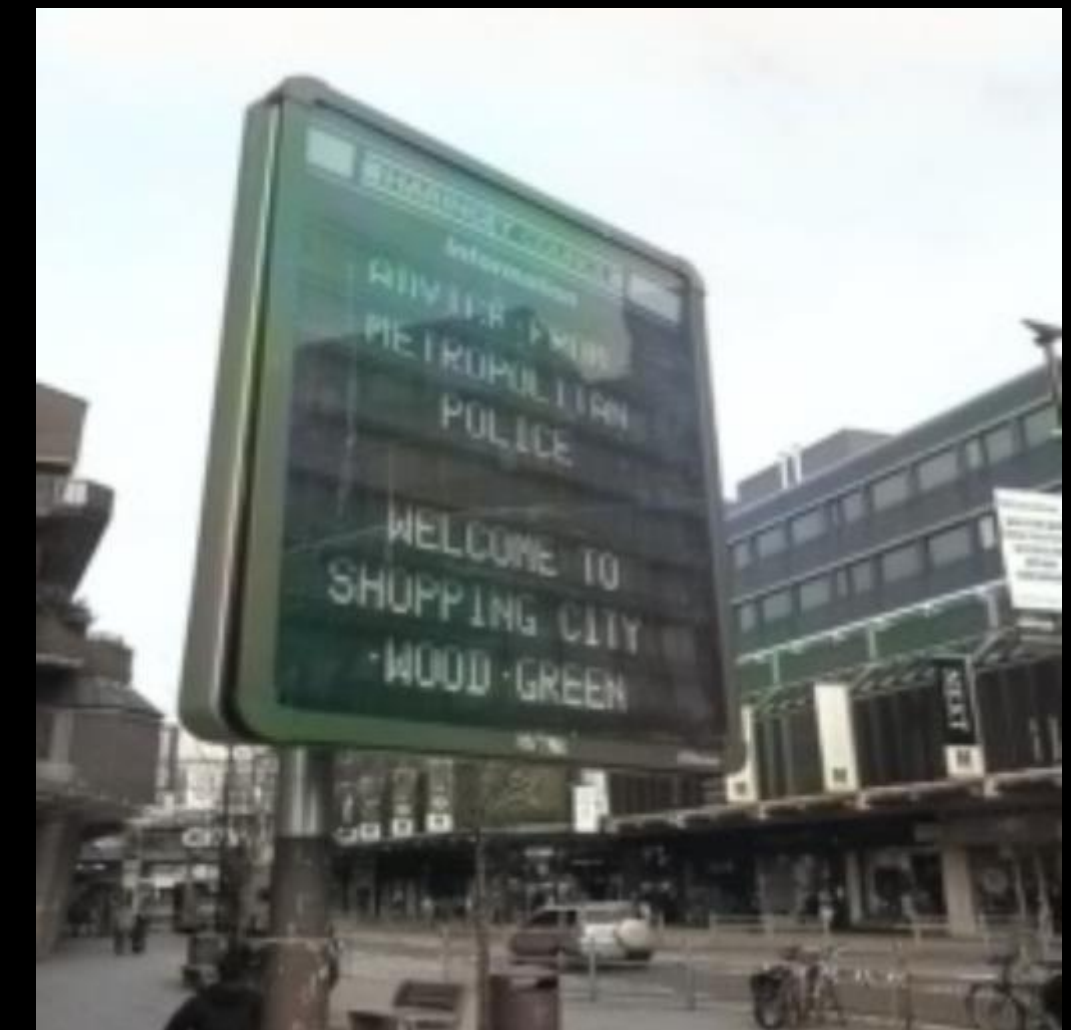

L-CoDe

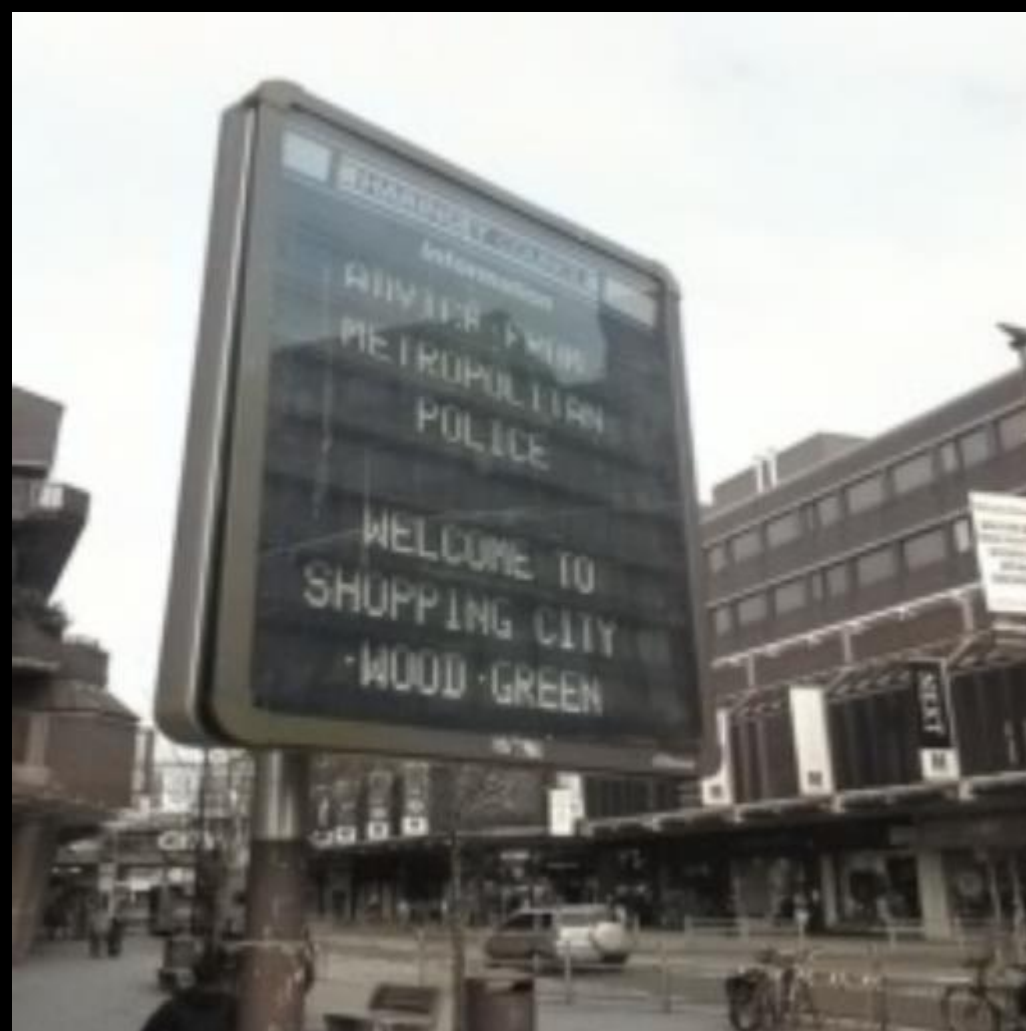

L-CoDer

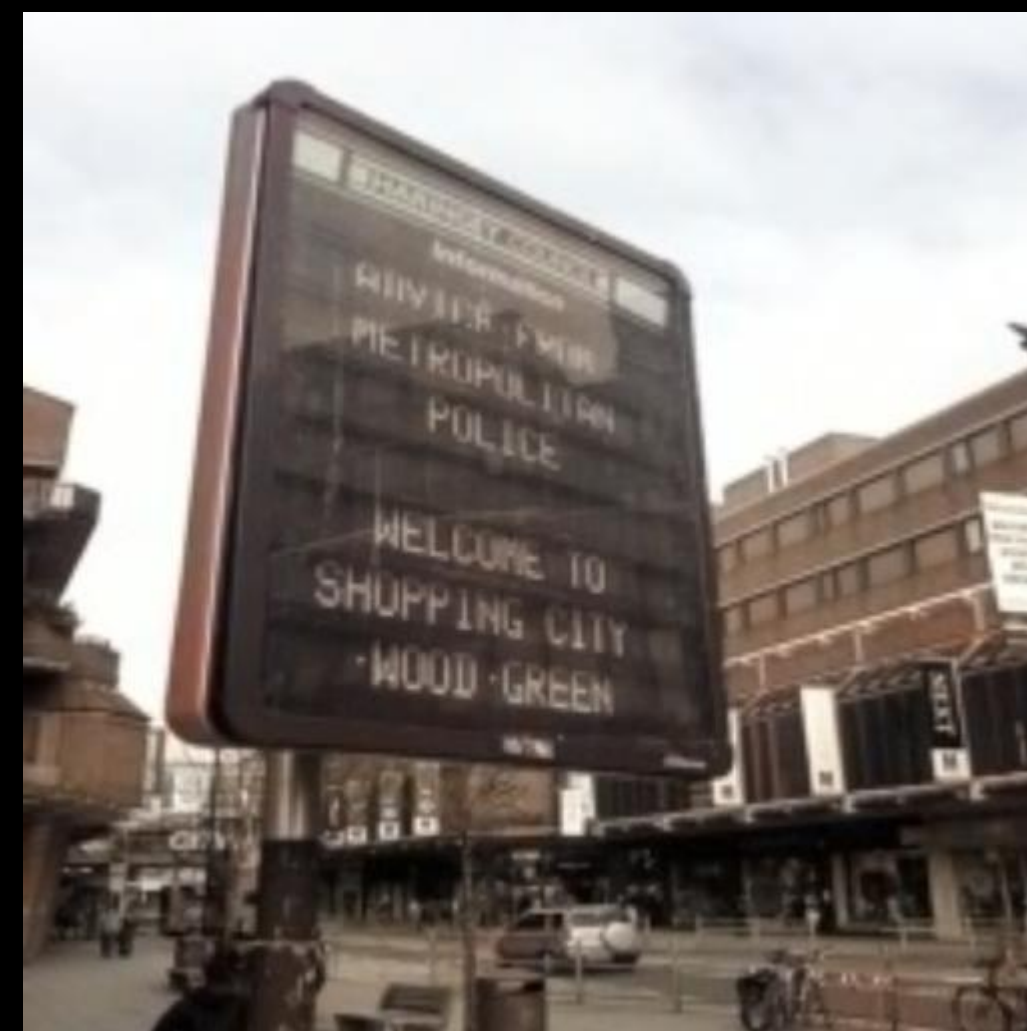

L-CoIns

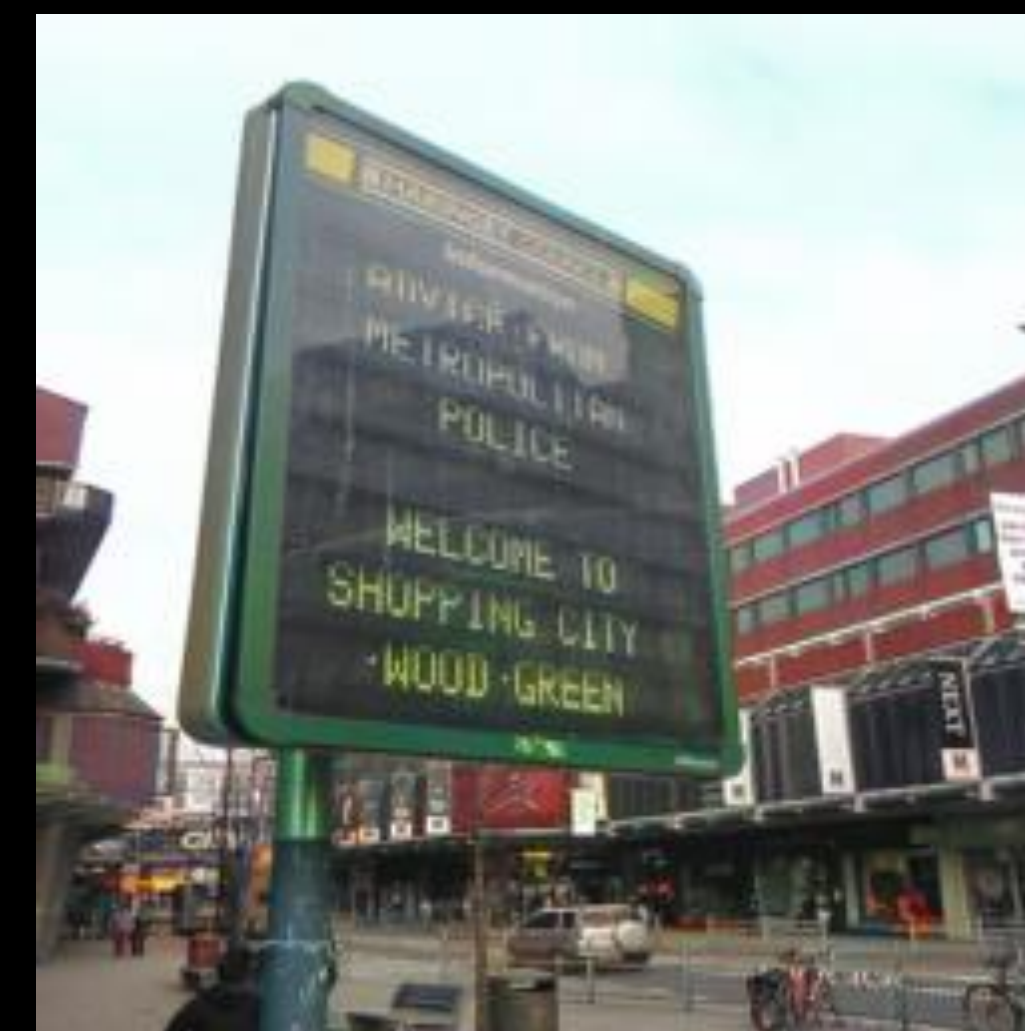

L-CAD

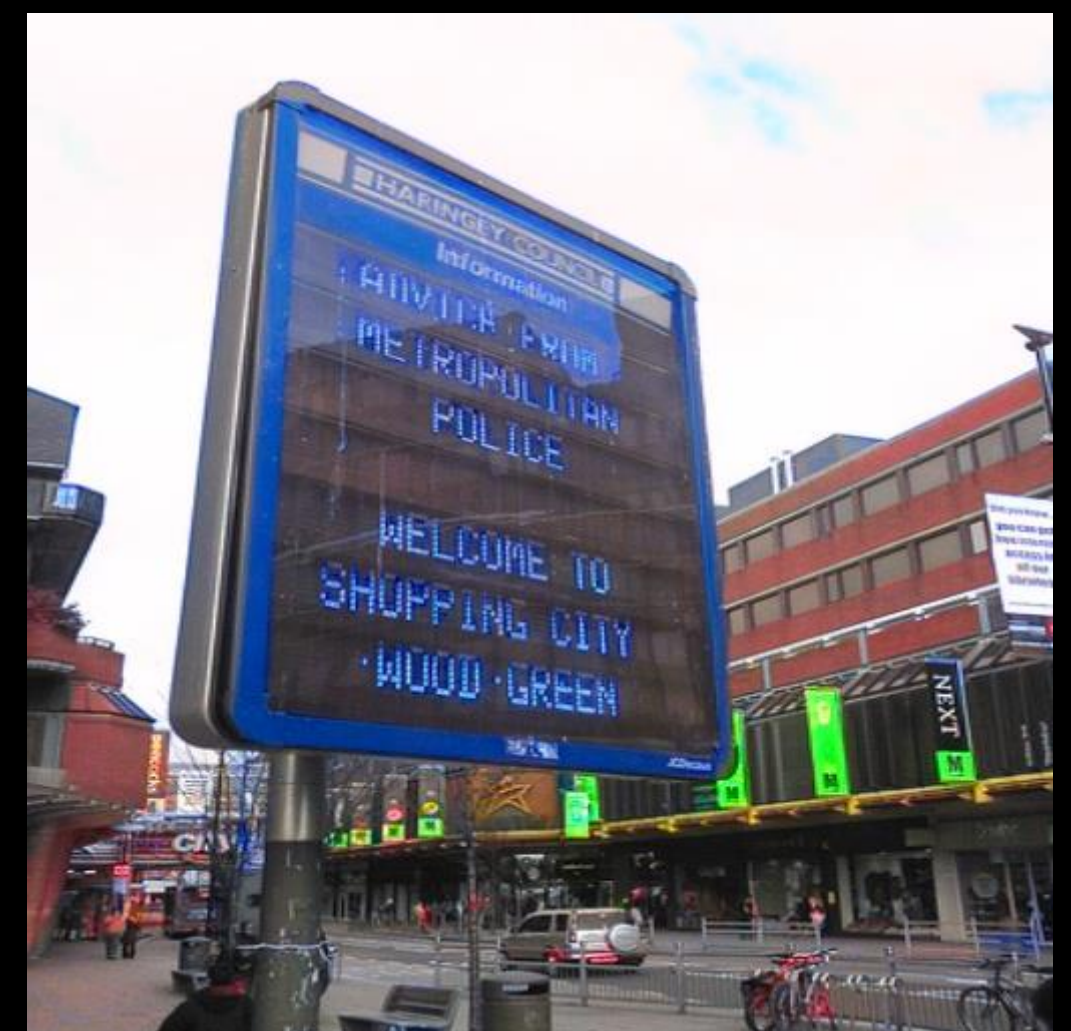

Ours



a single **white** rose  
in a glass vase

description

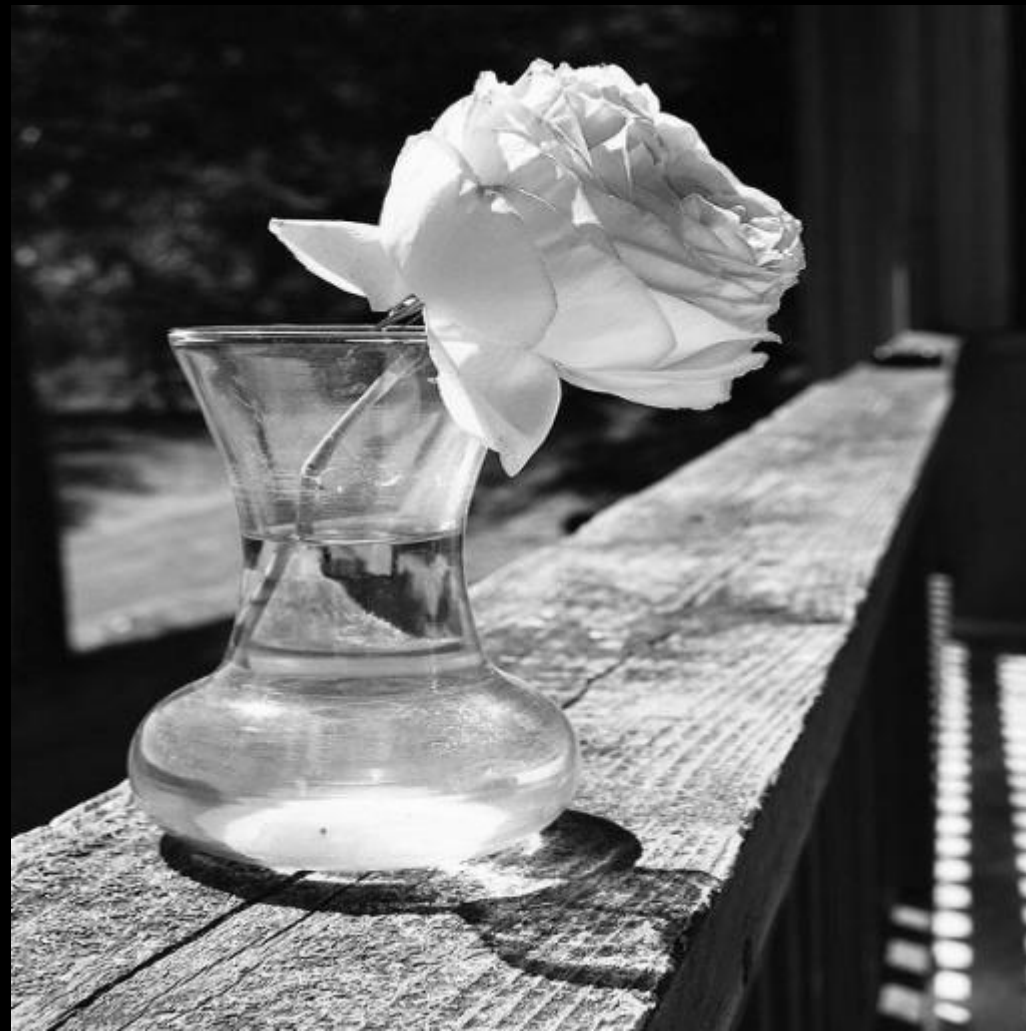

Input

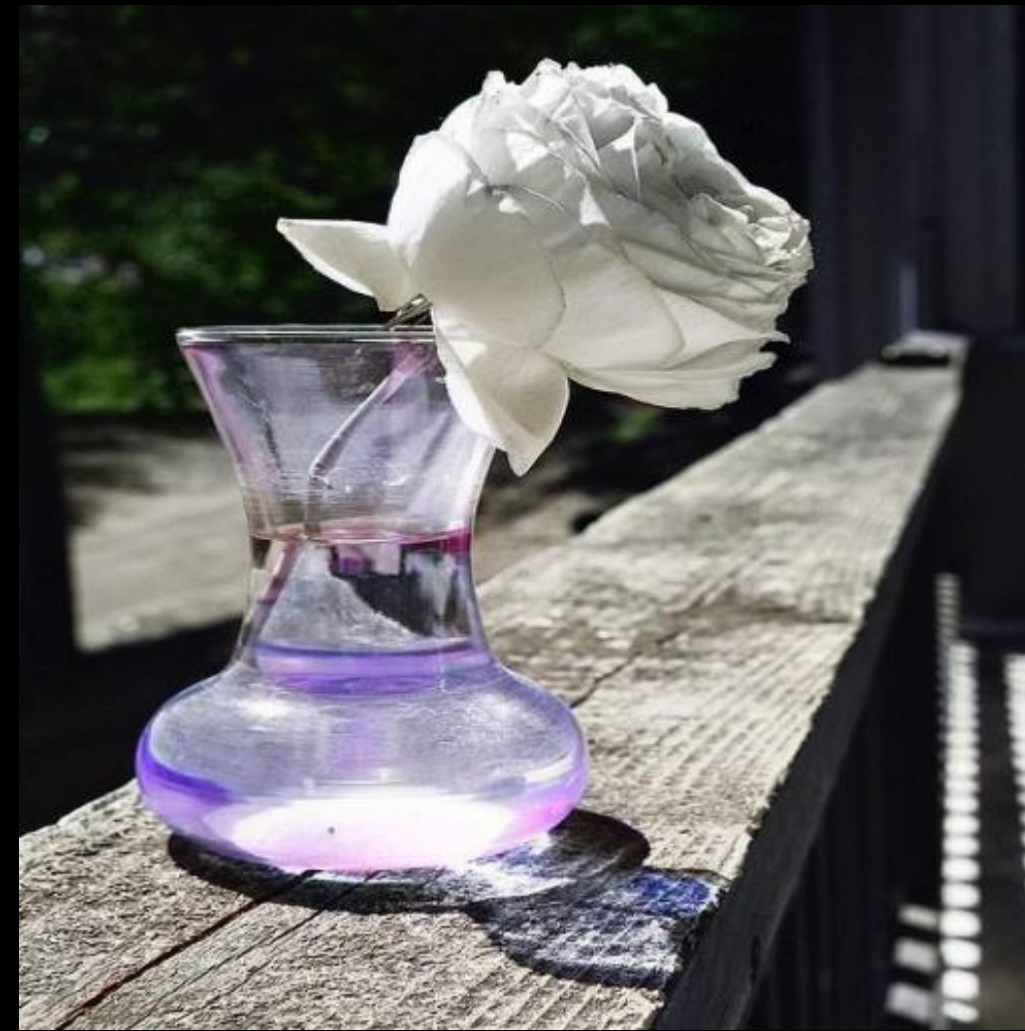

UniColor

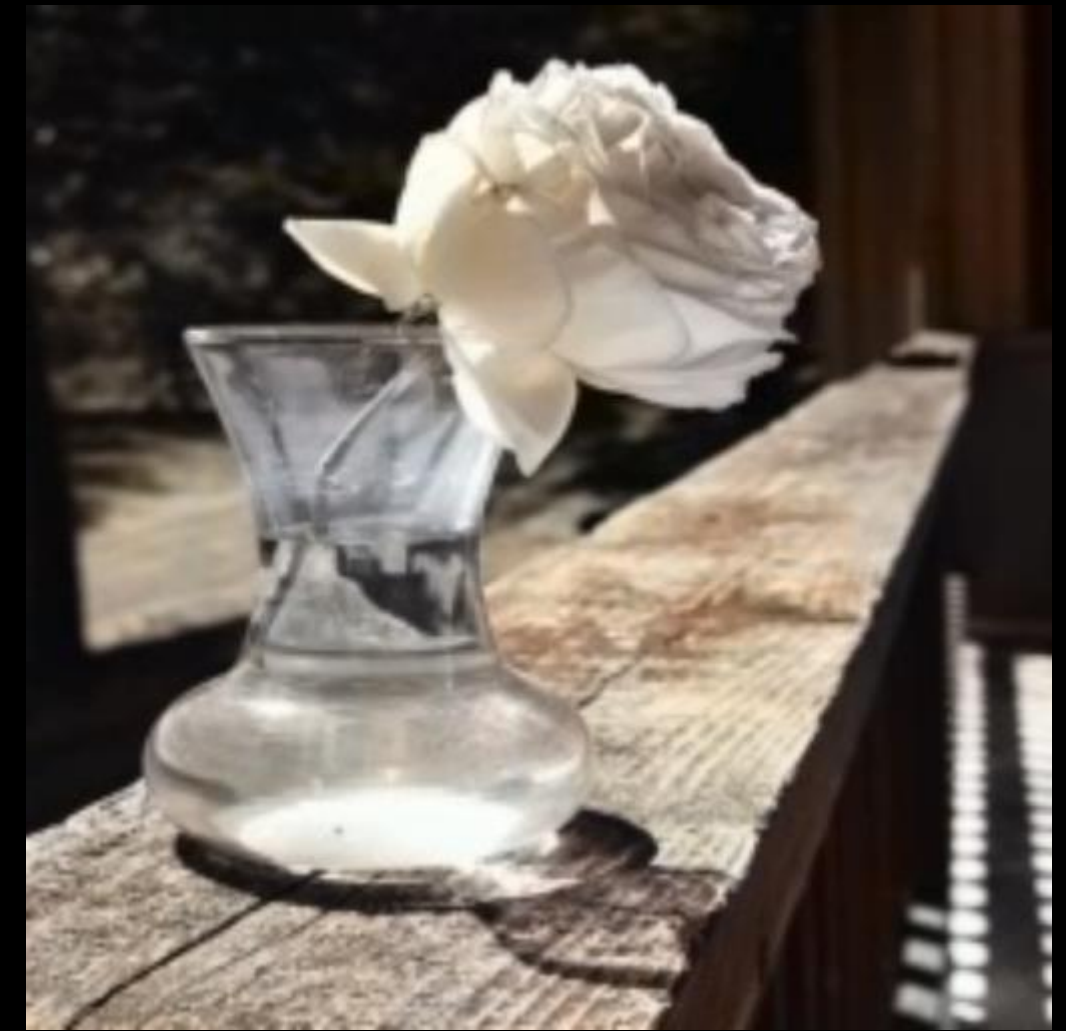

L-CoDe

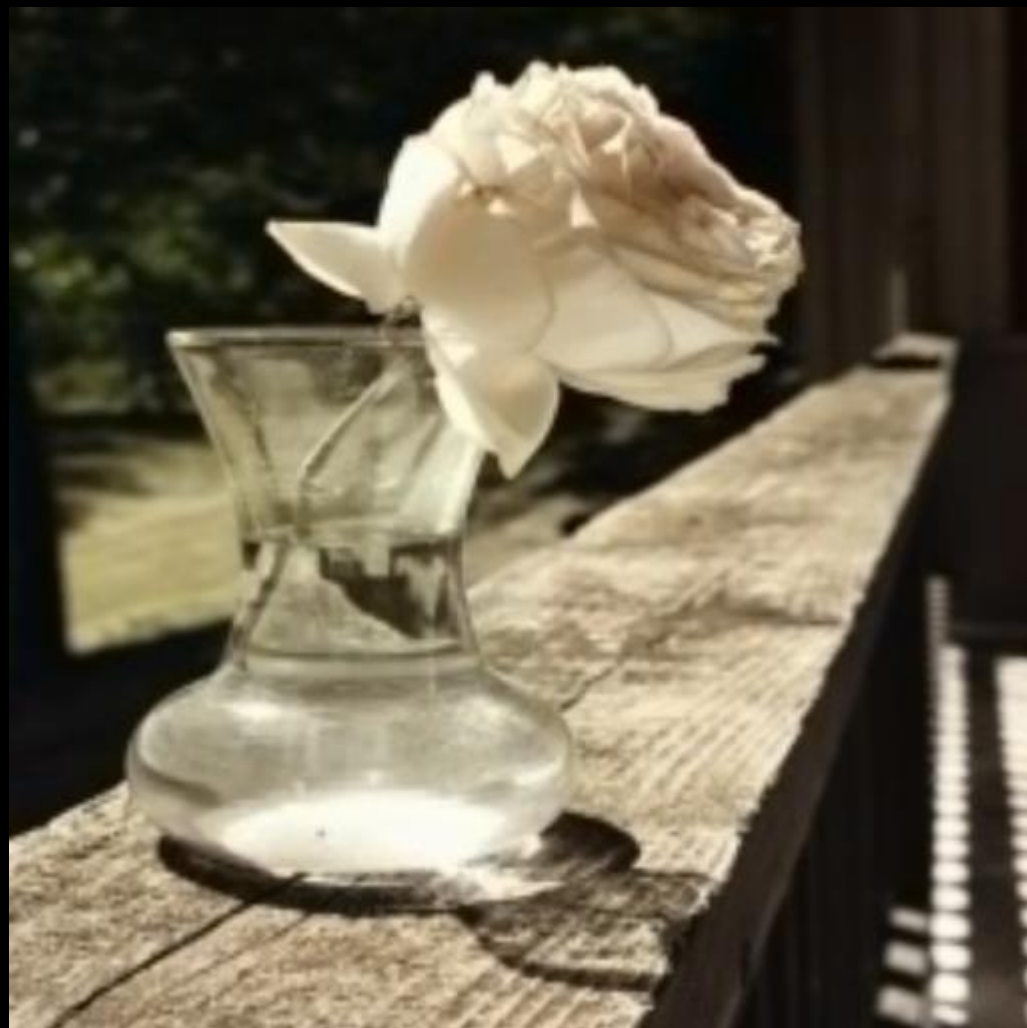

L-CoDer

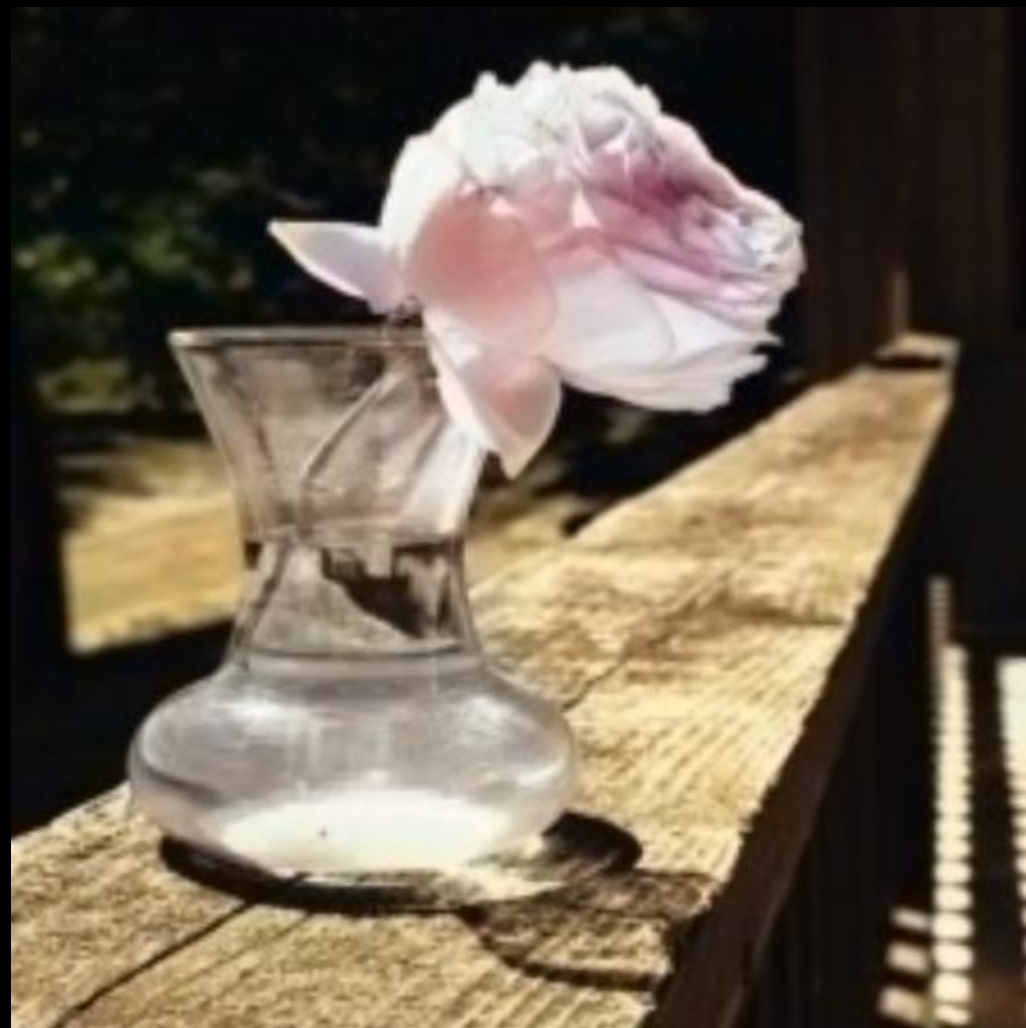

L-CoIns

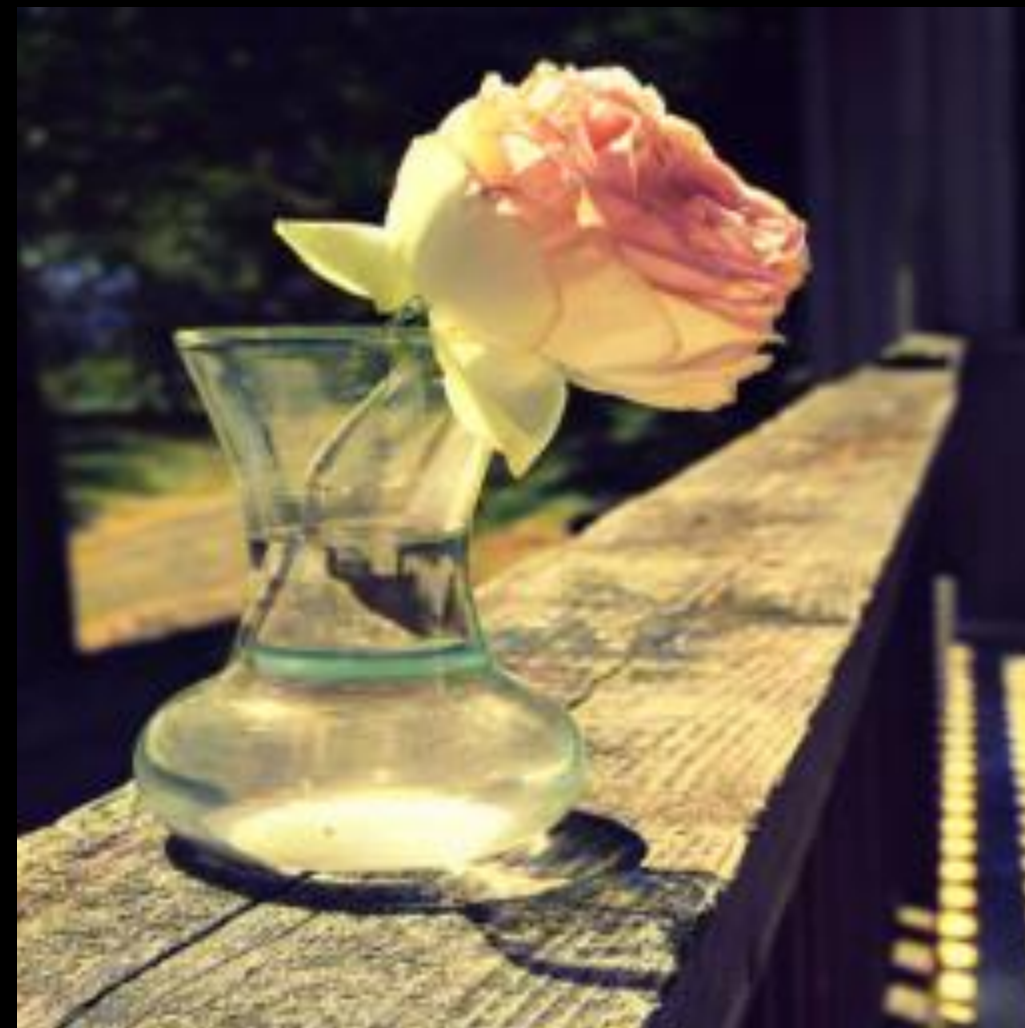

L-CAD

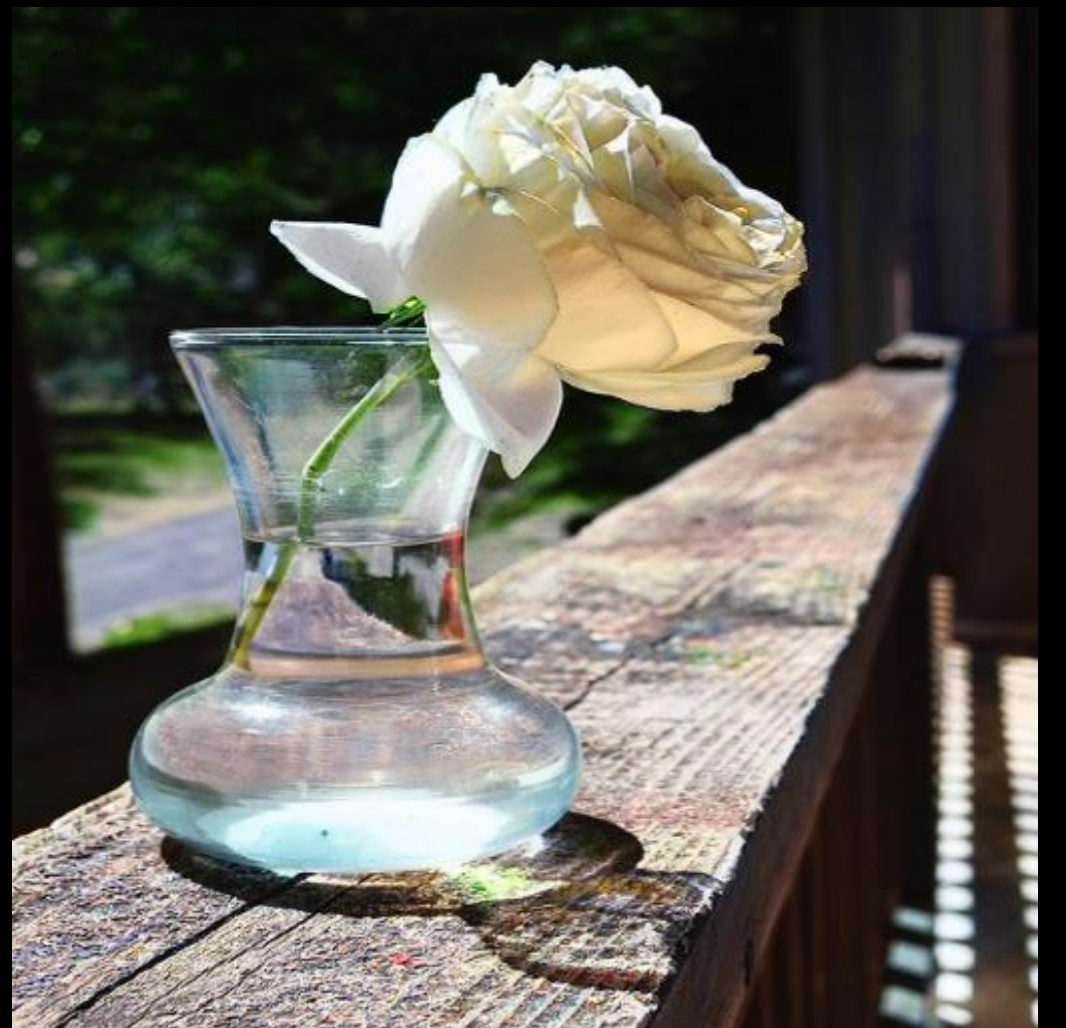

Ours



a red truck sitting  
on a grassy field  
next to other trucks

description

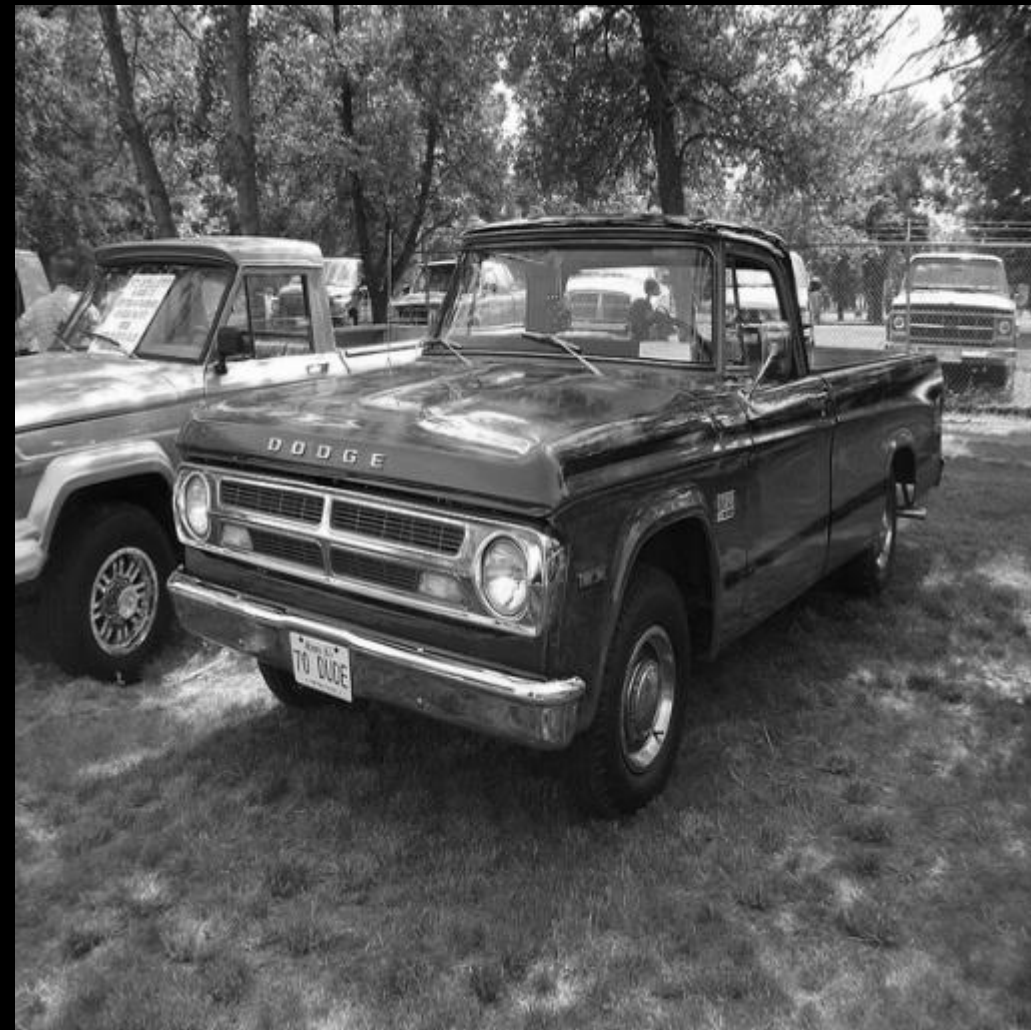

Input

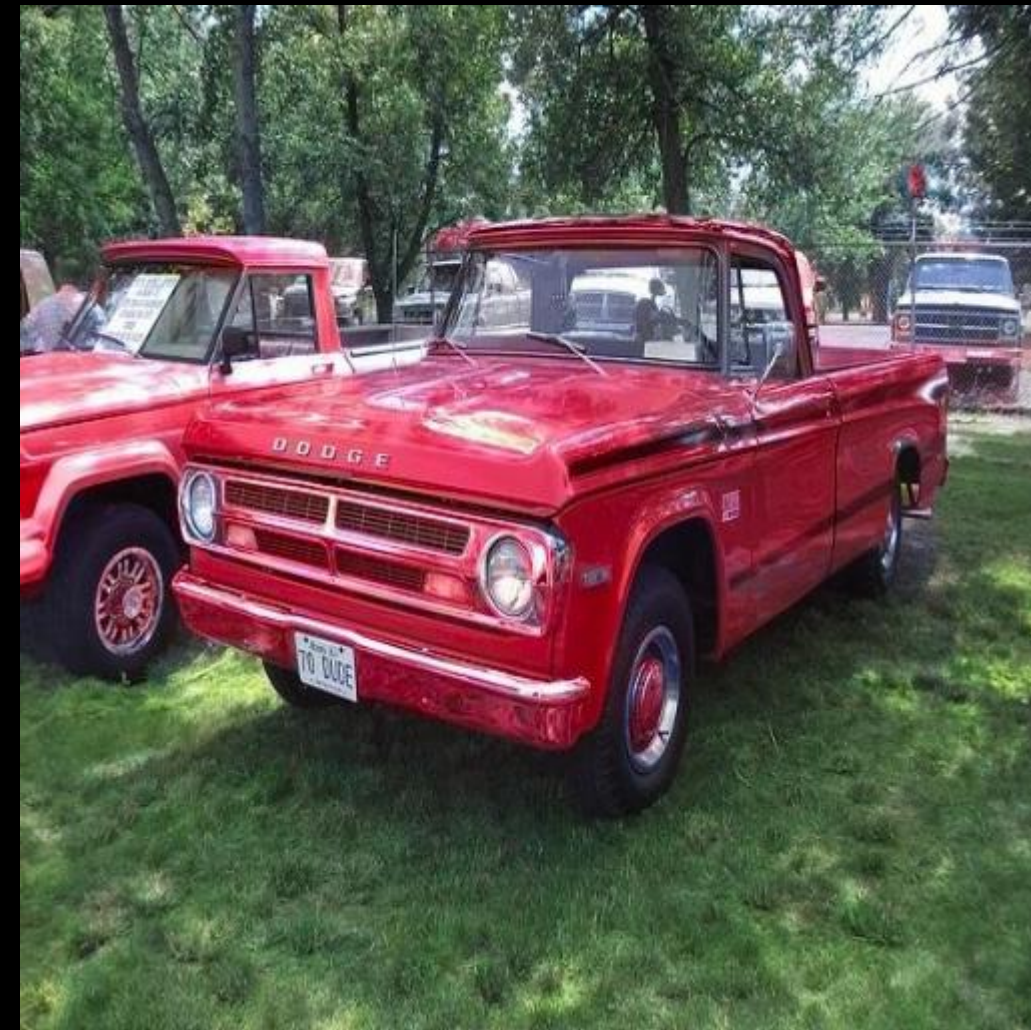

UniColor

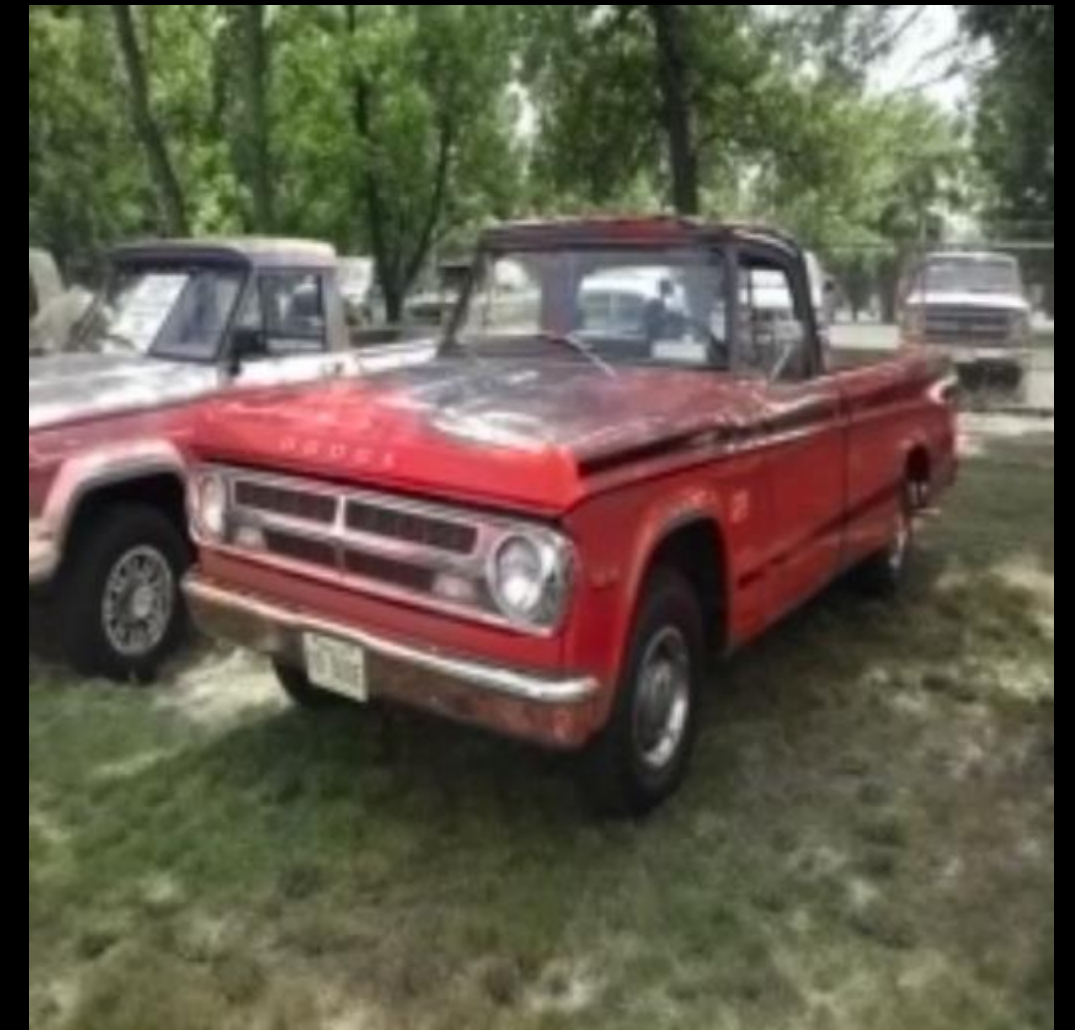

L-CoDe

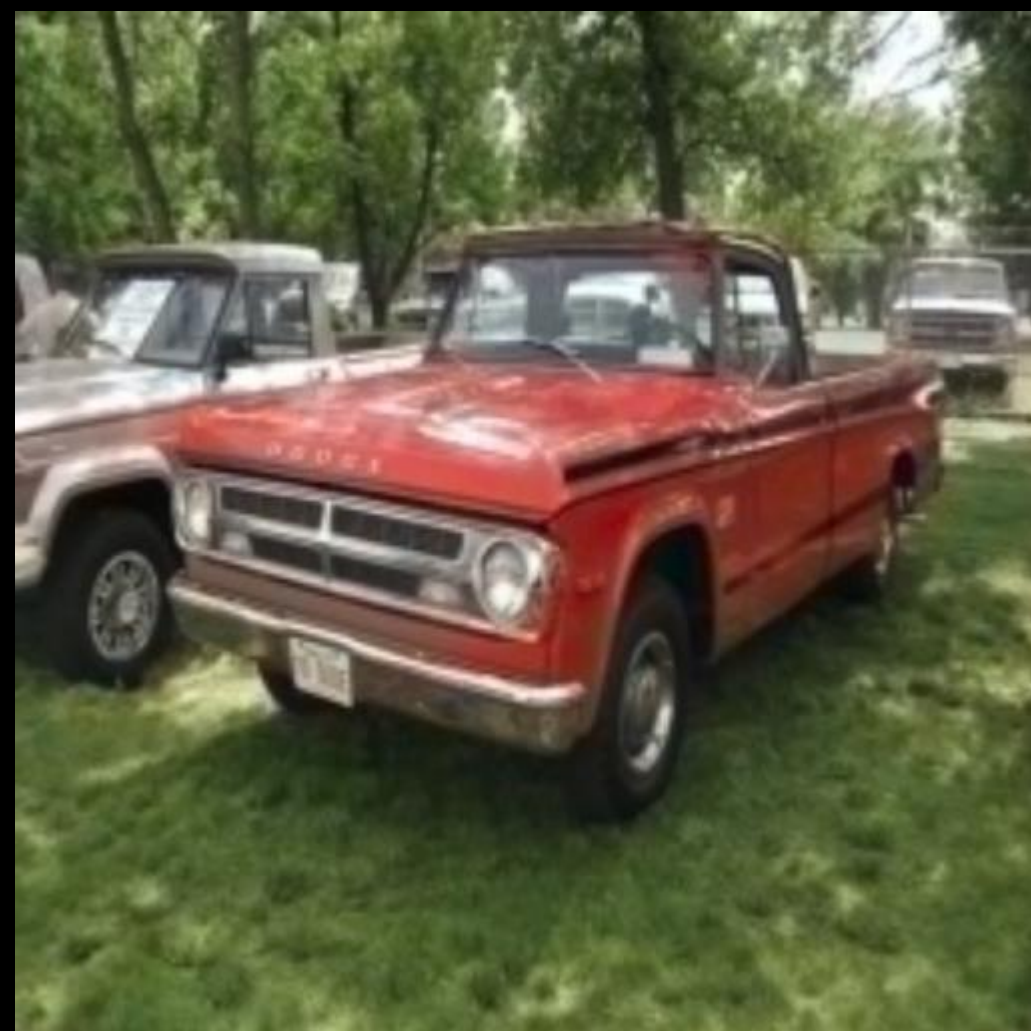

L-CoDer

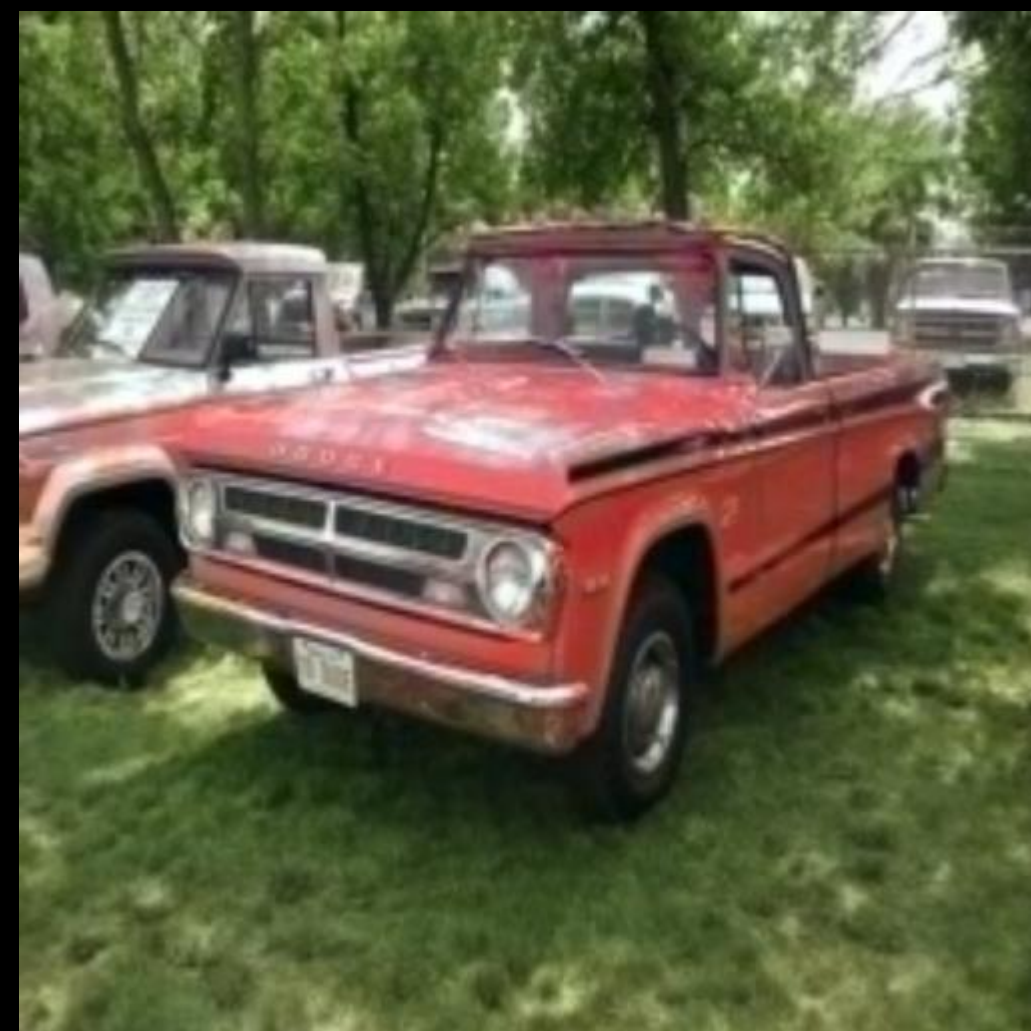

L-CoIns

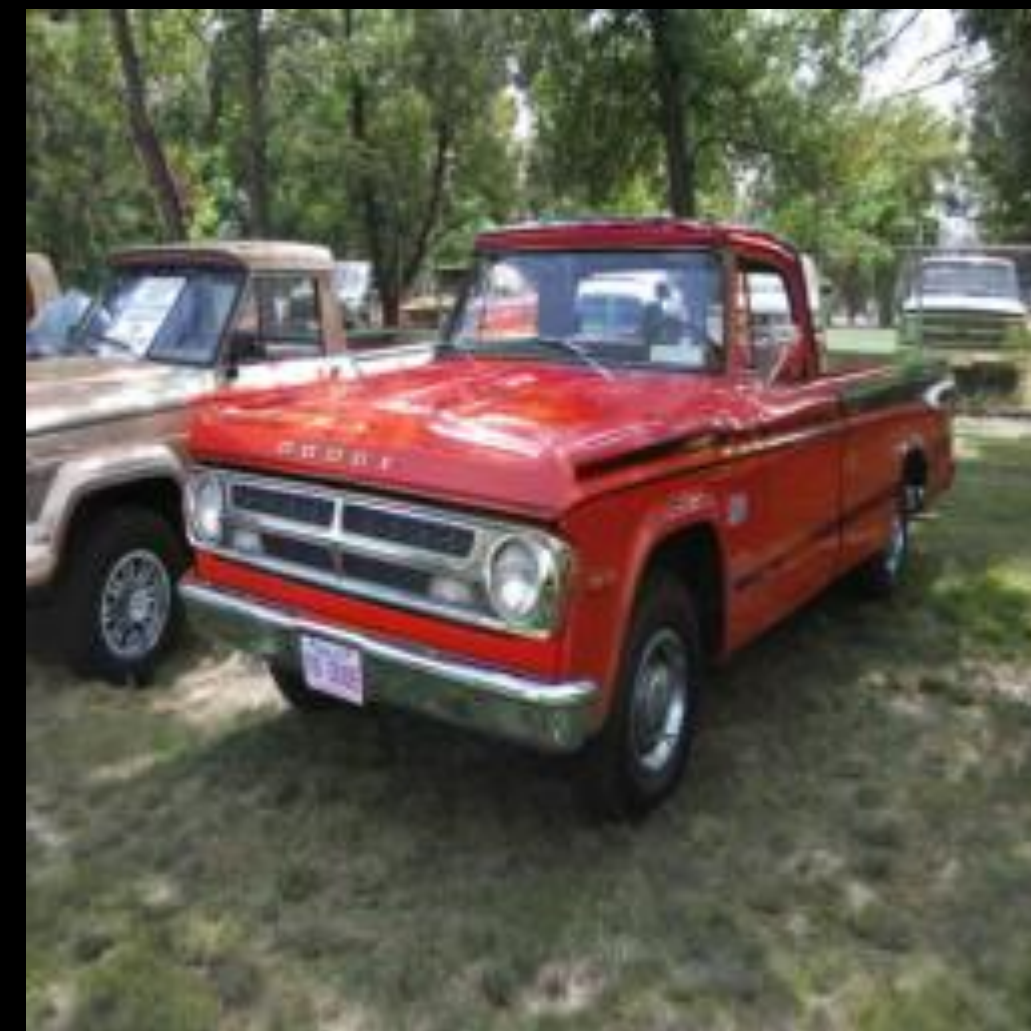

L-CAD

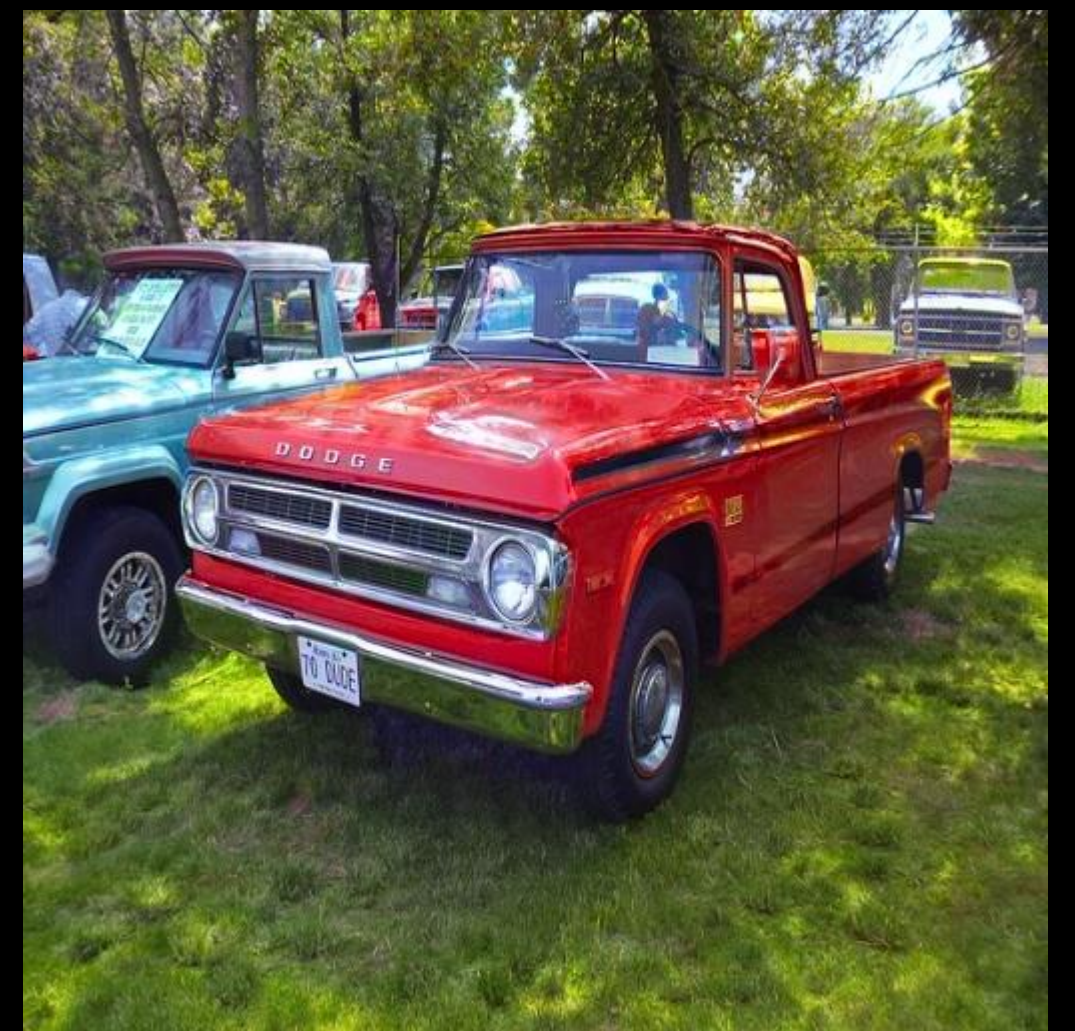

Ours



two **brown** and  
white dogs running  
in a park

description

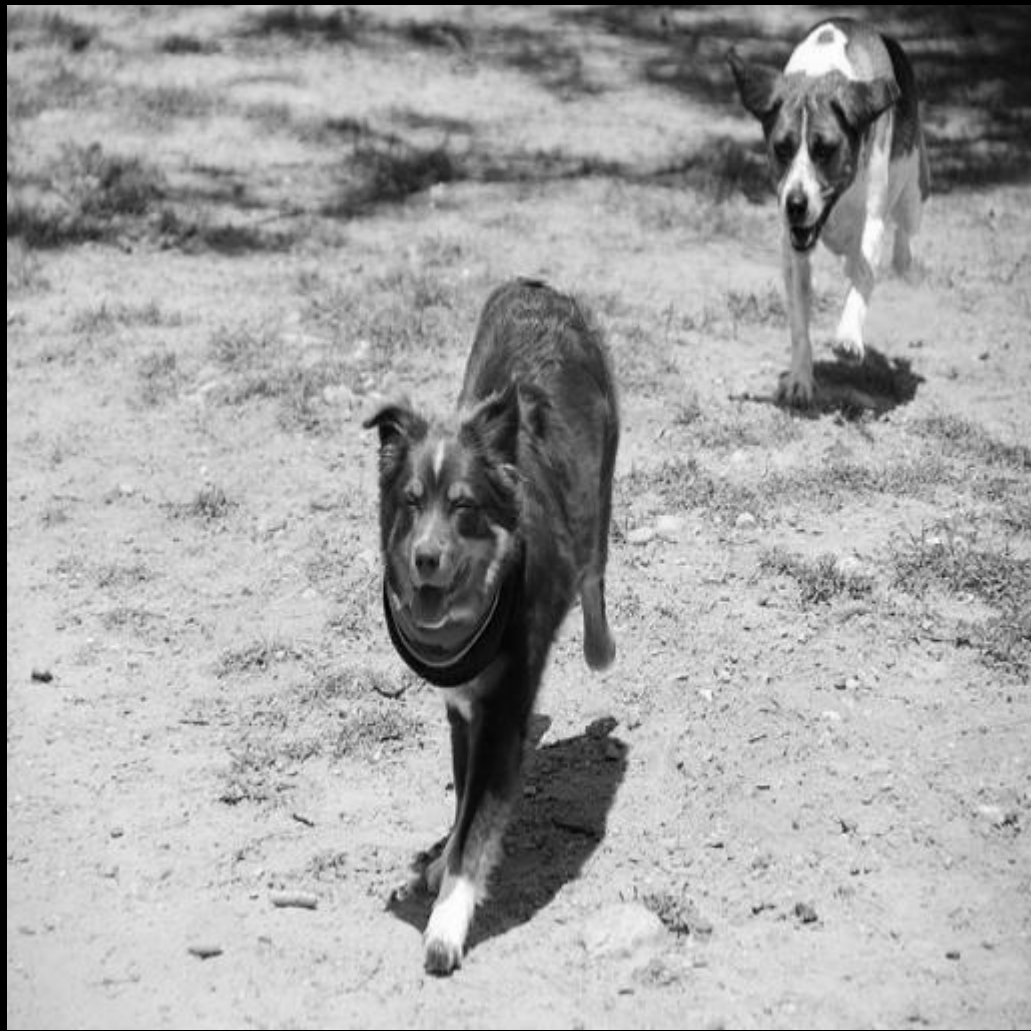

Input

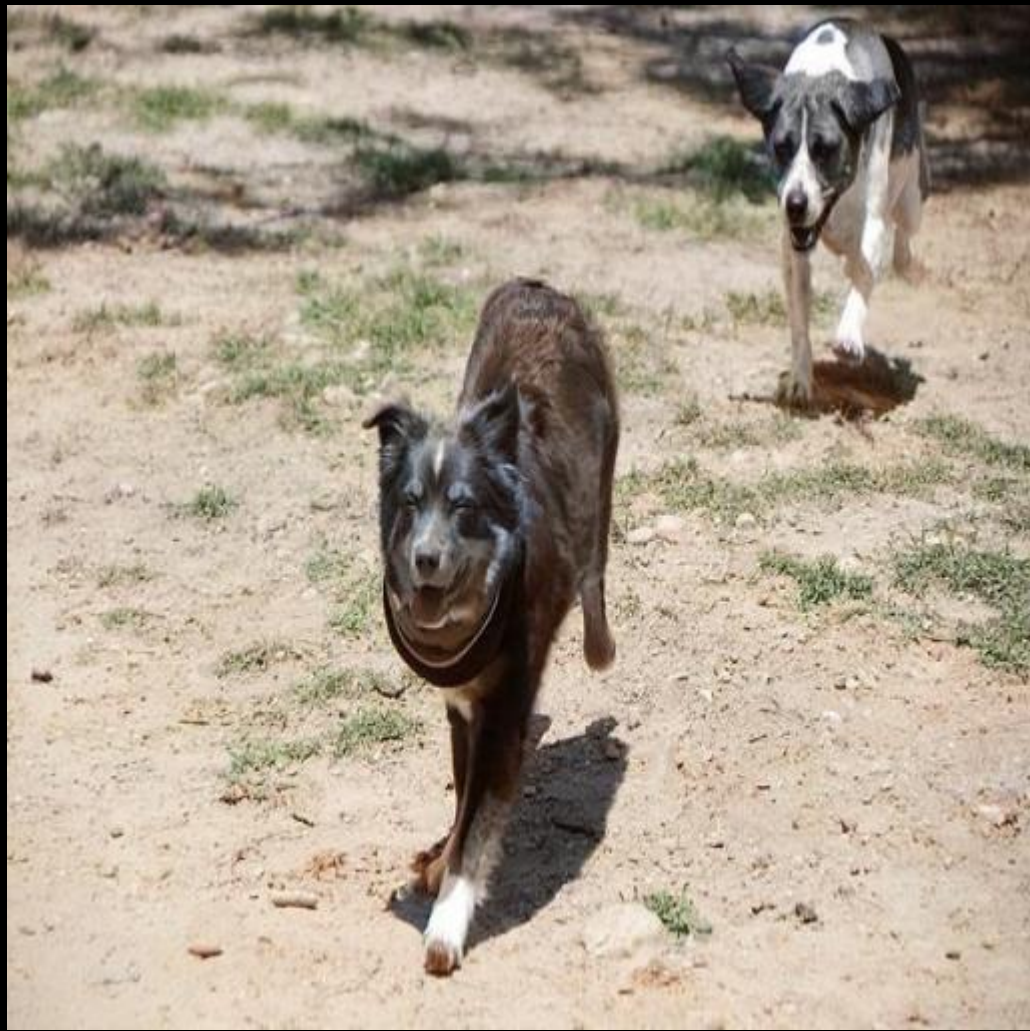

UniColor

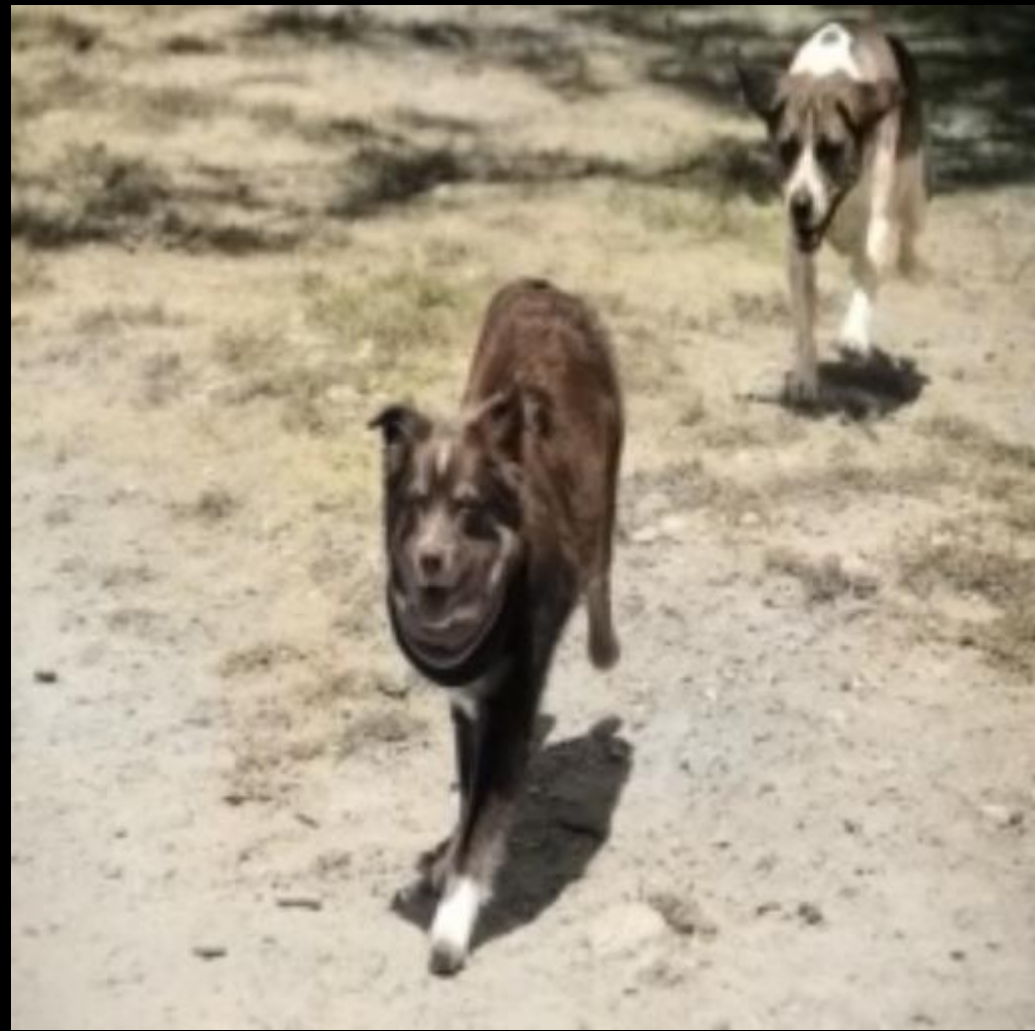

L-CoDe

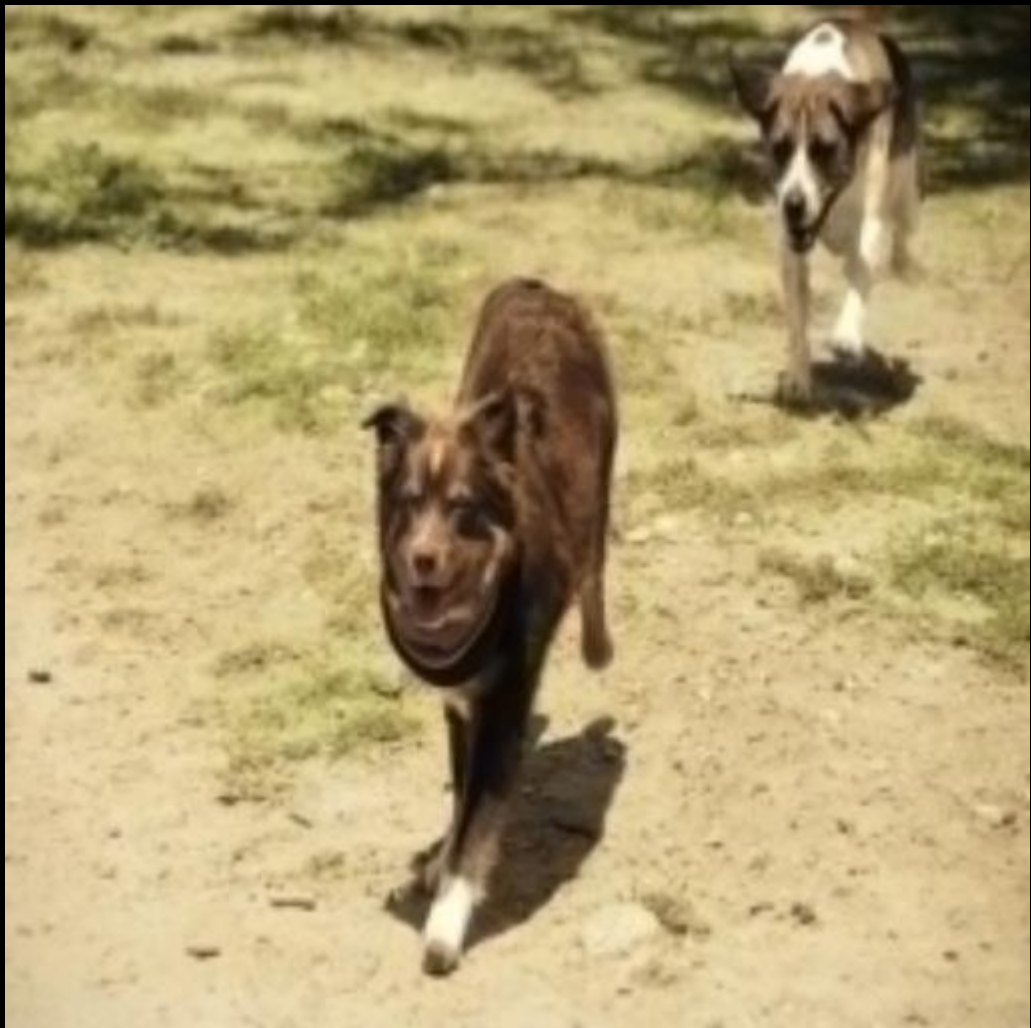

L-CoDer

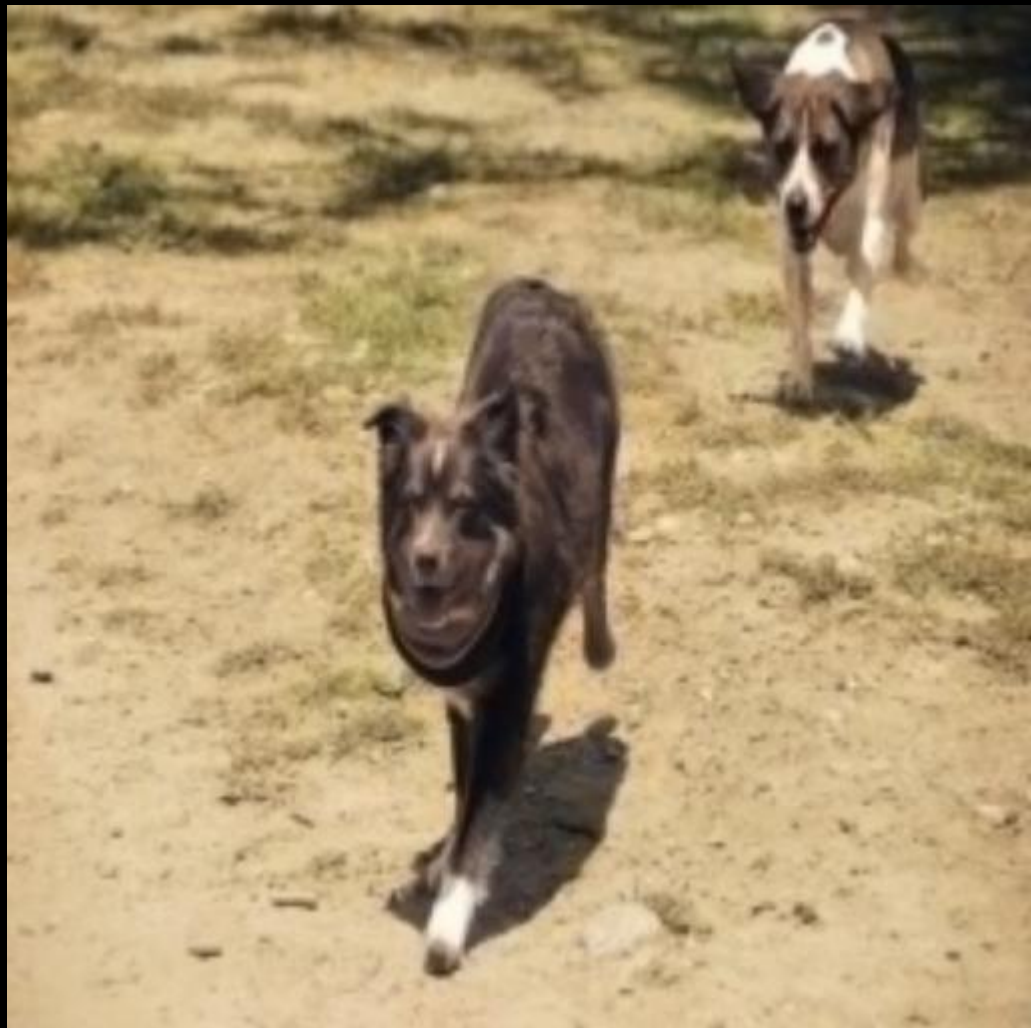

L-CoIns

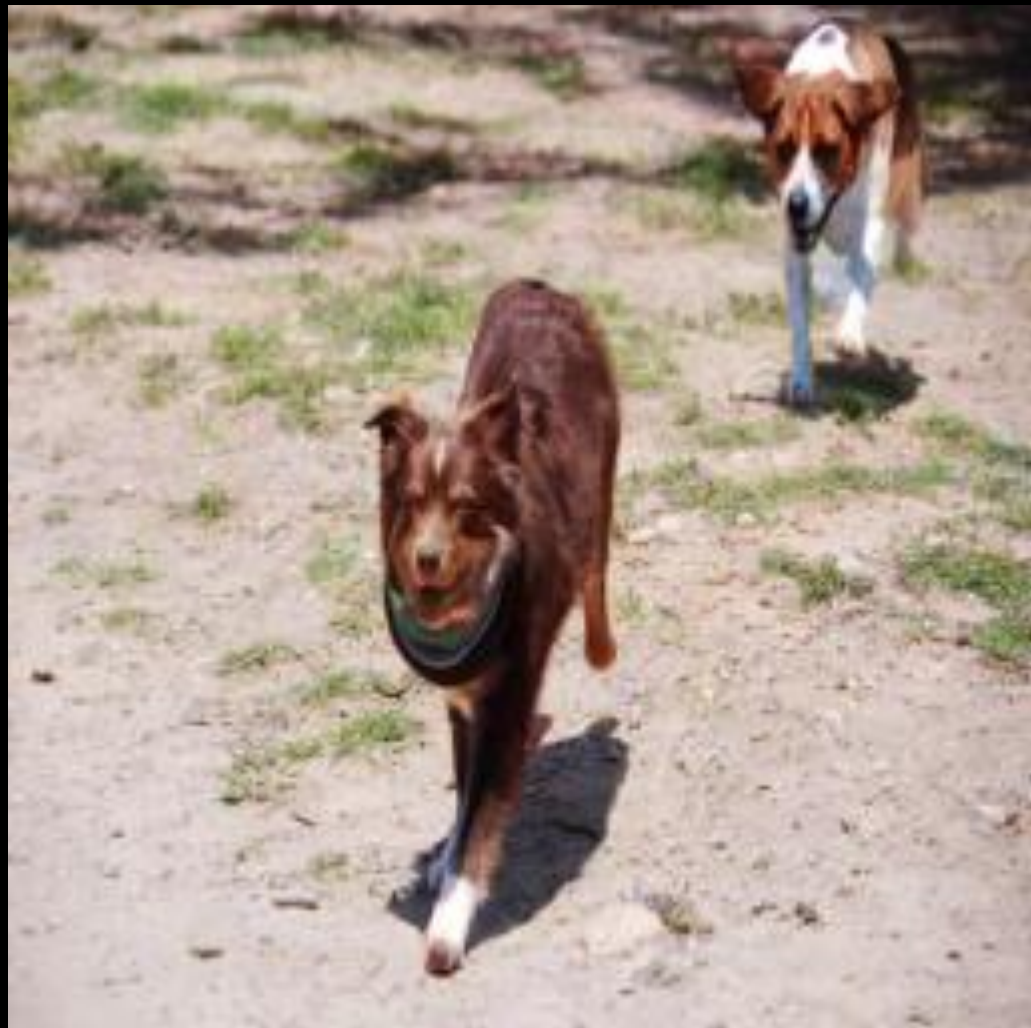

L-CAD

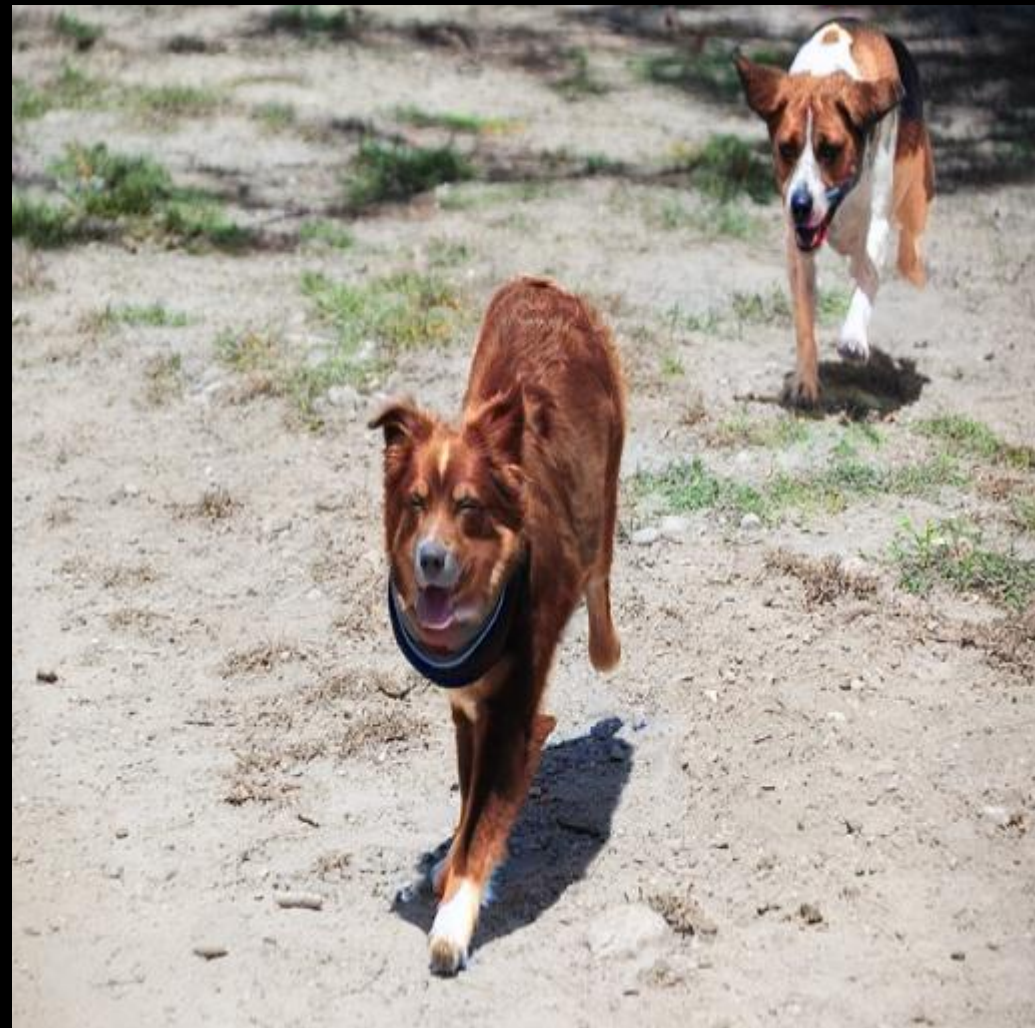

Ours



a **red** passenger bus  
is on the street

description

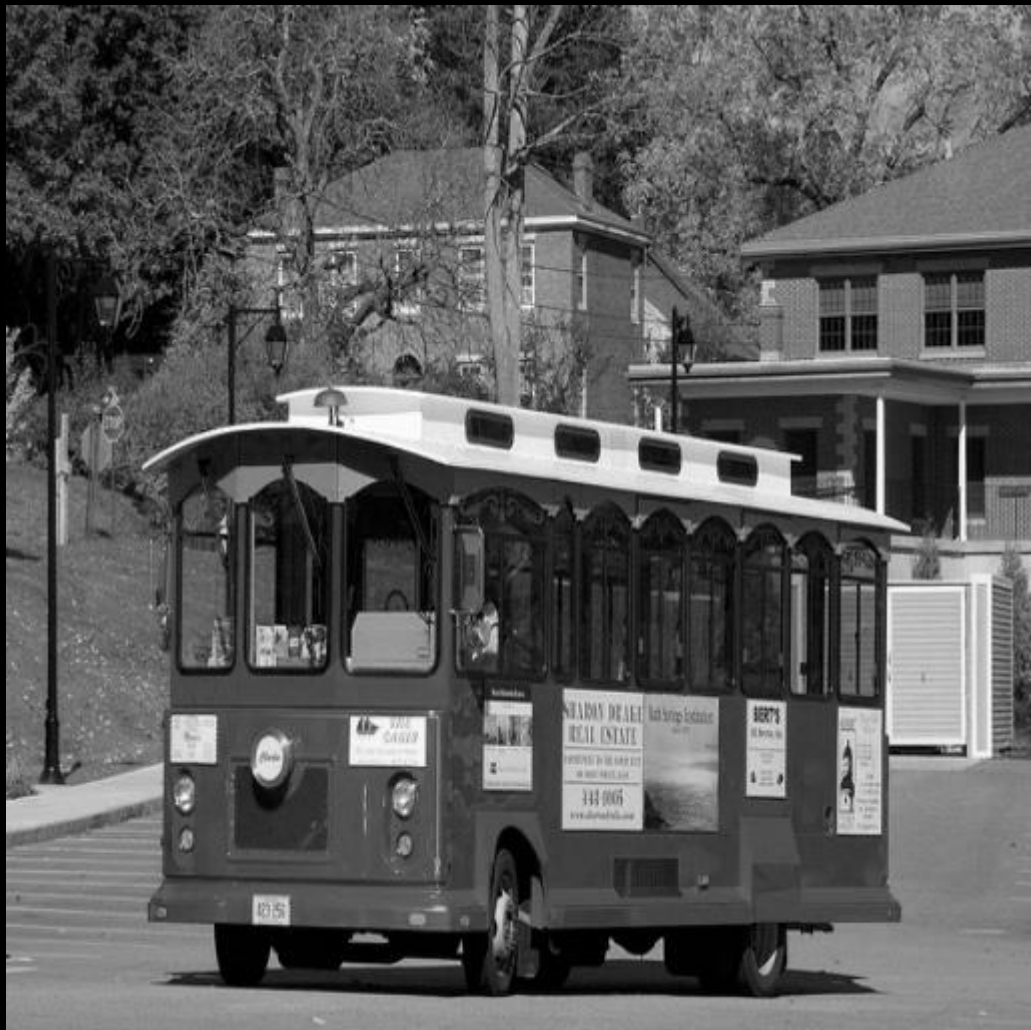

Input

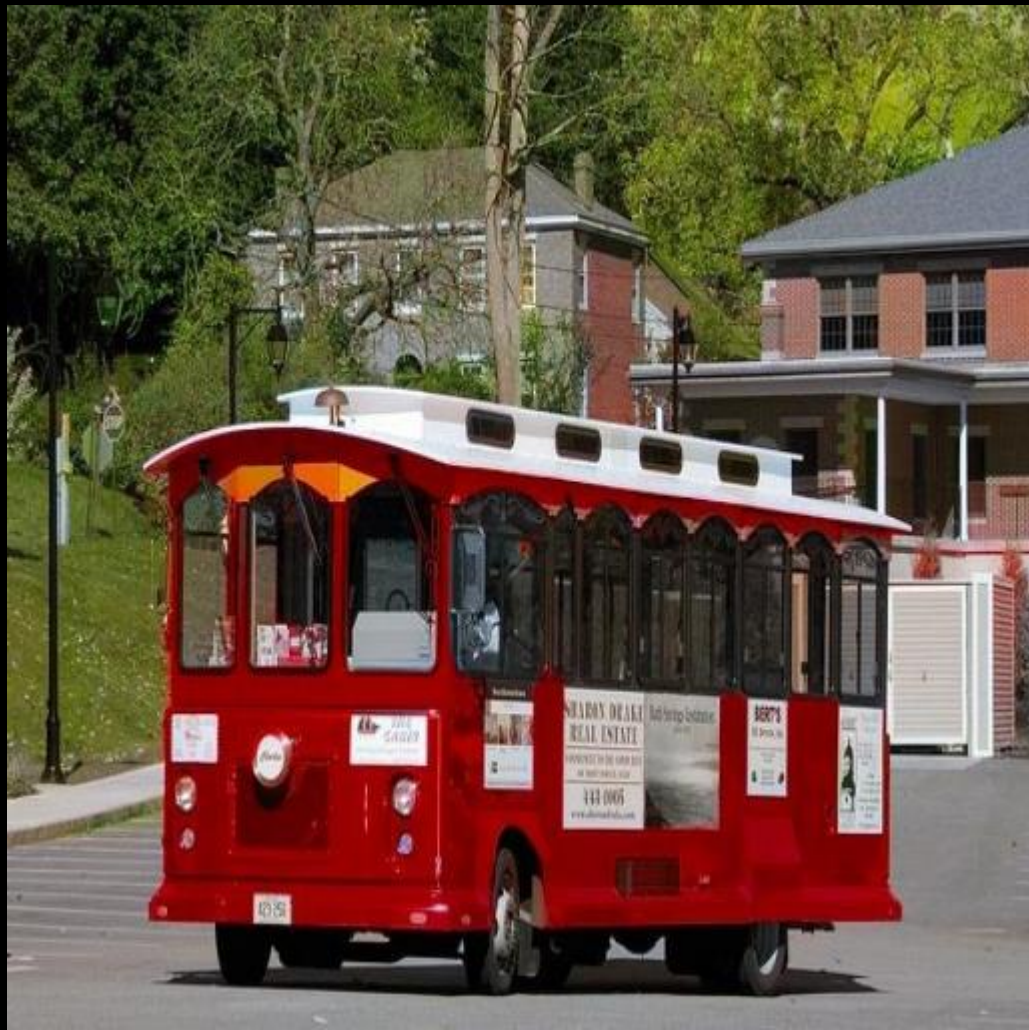

UniColor

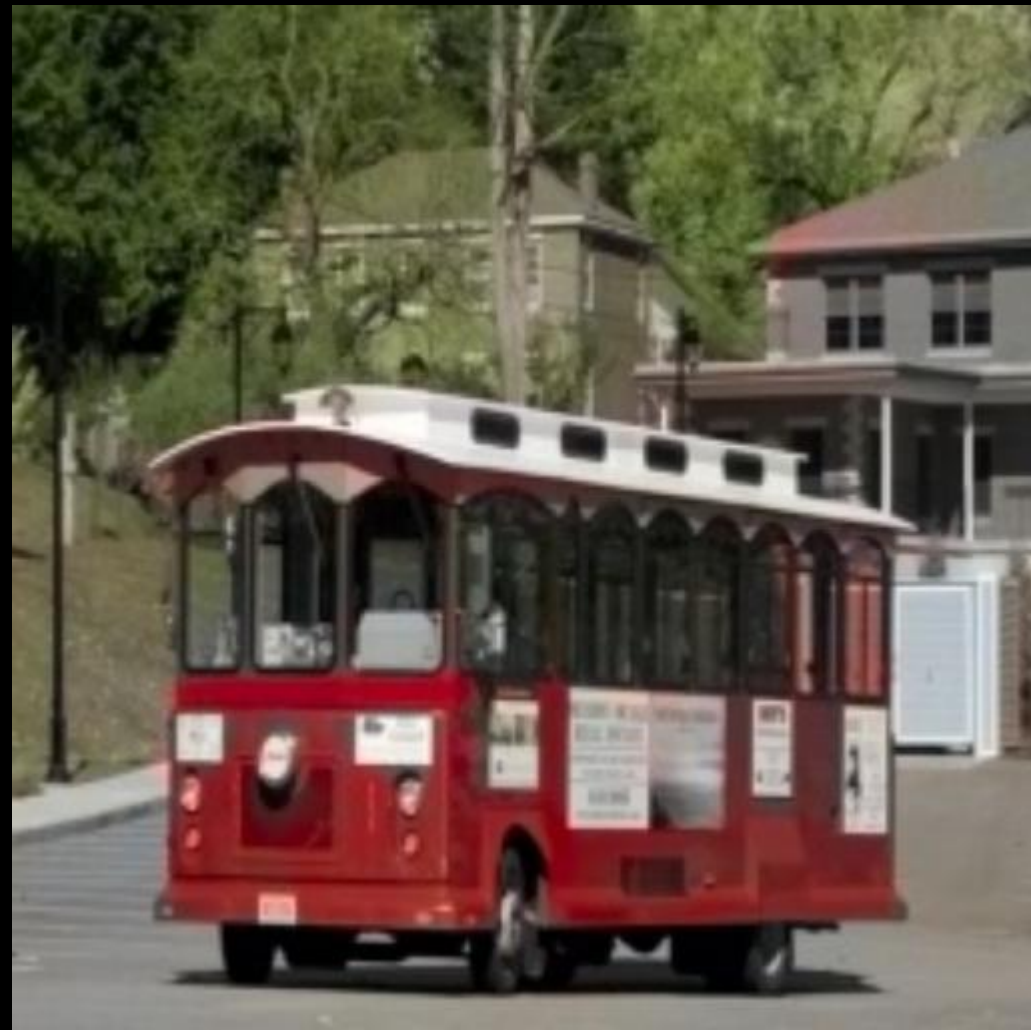

L-CoDe

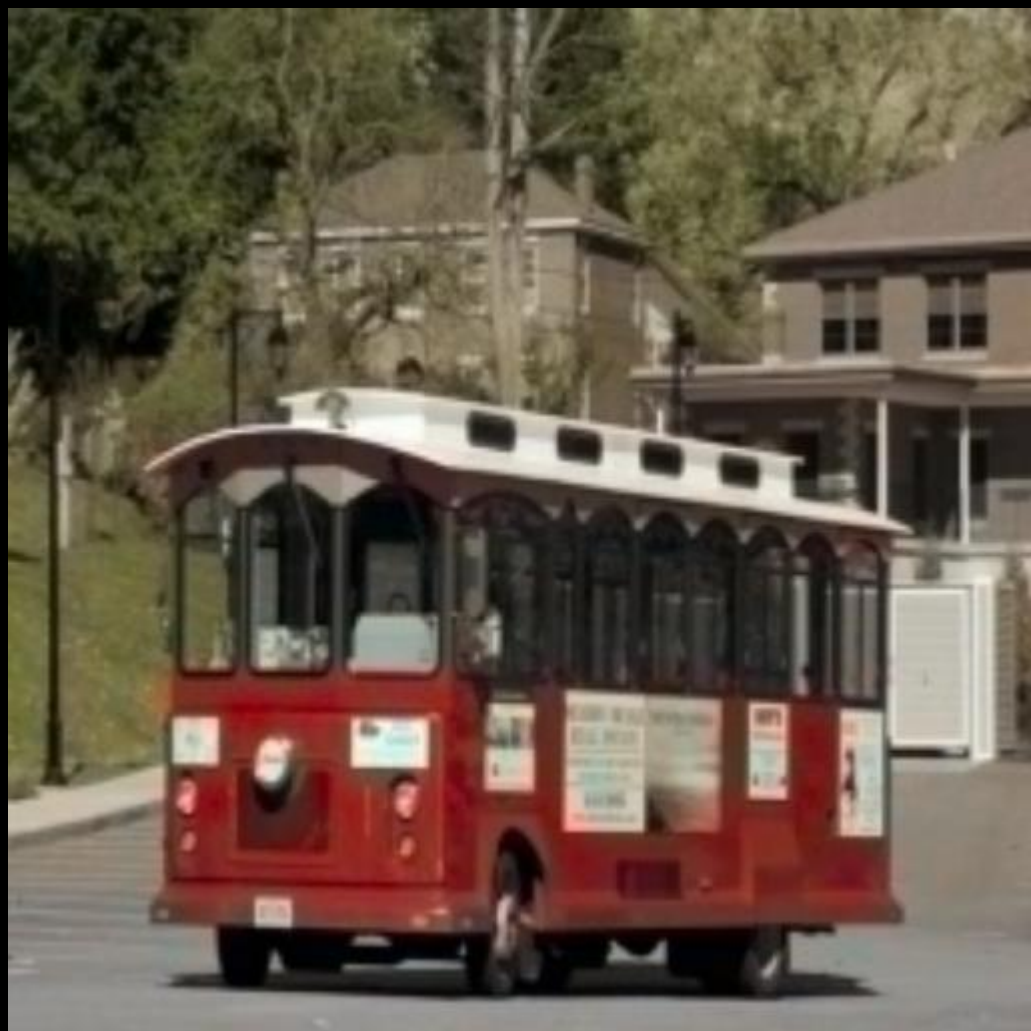

L-CoDer

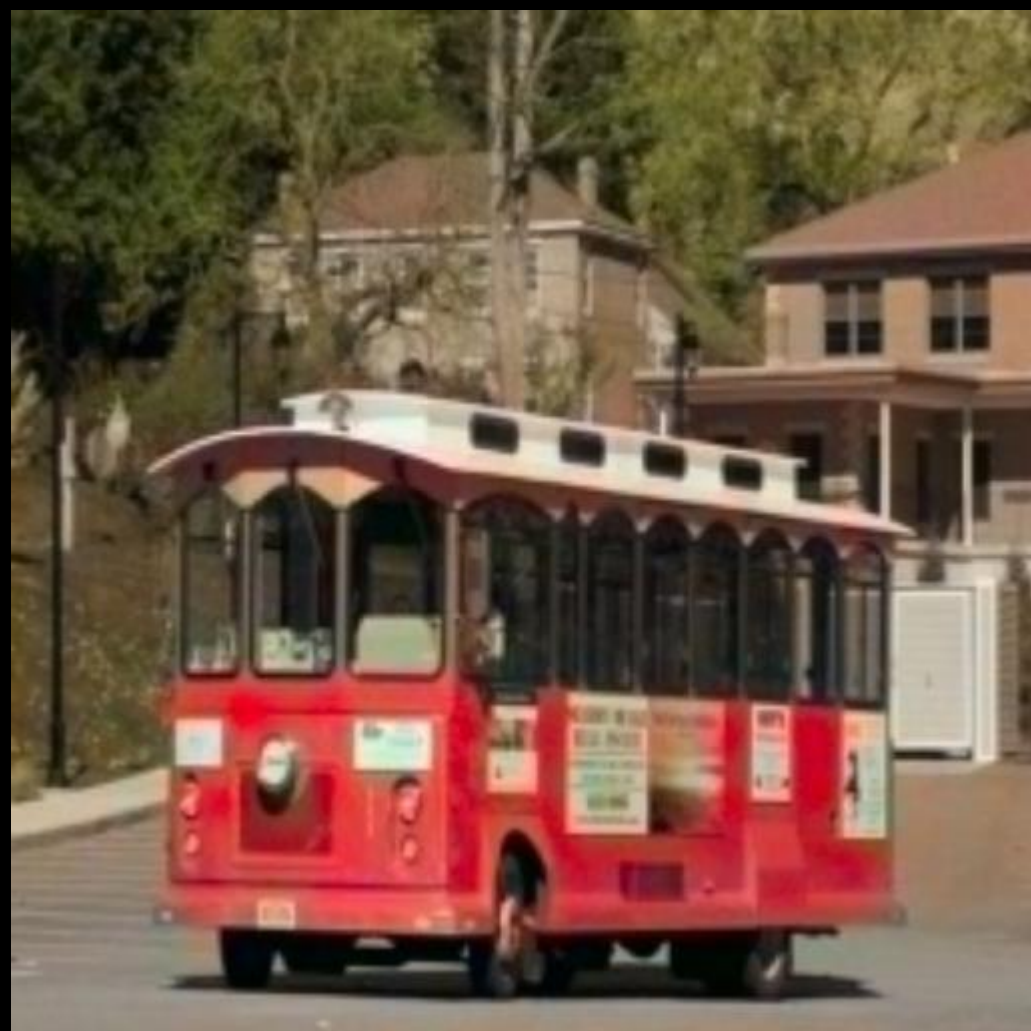

L-CoIns

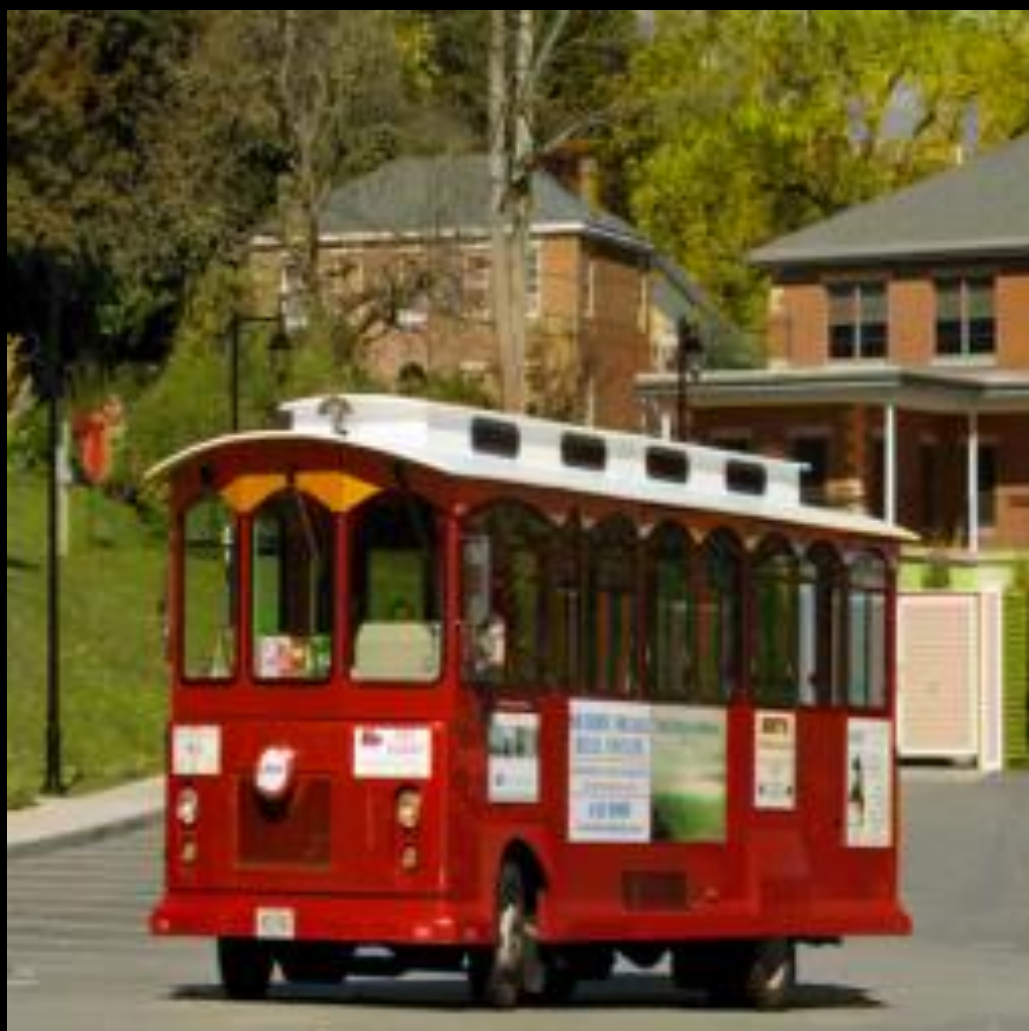

L-CAD

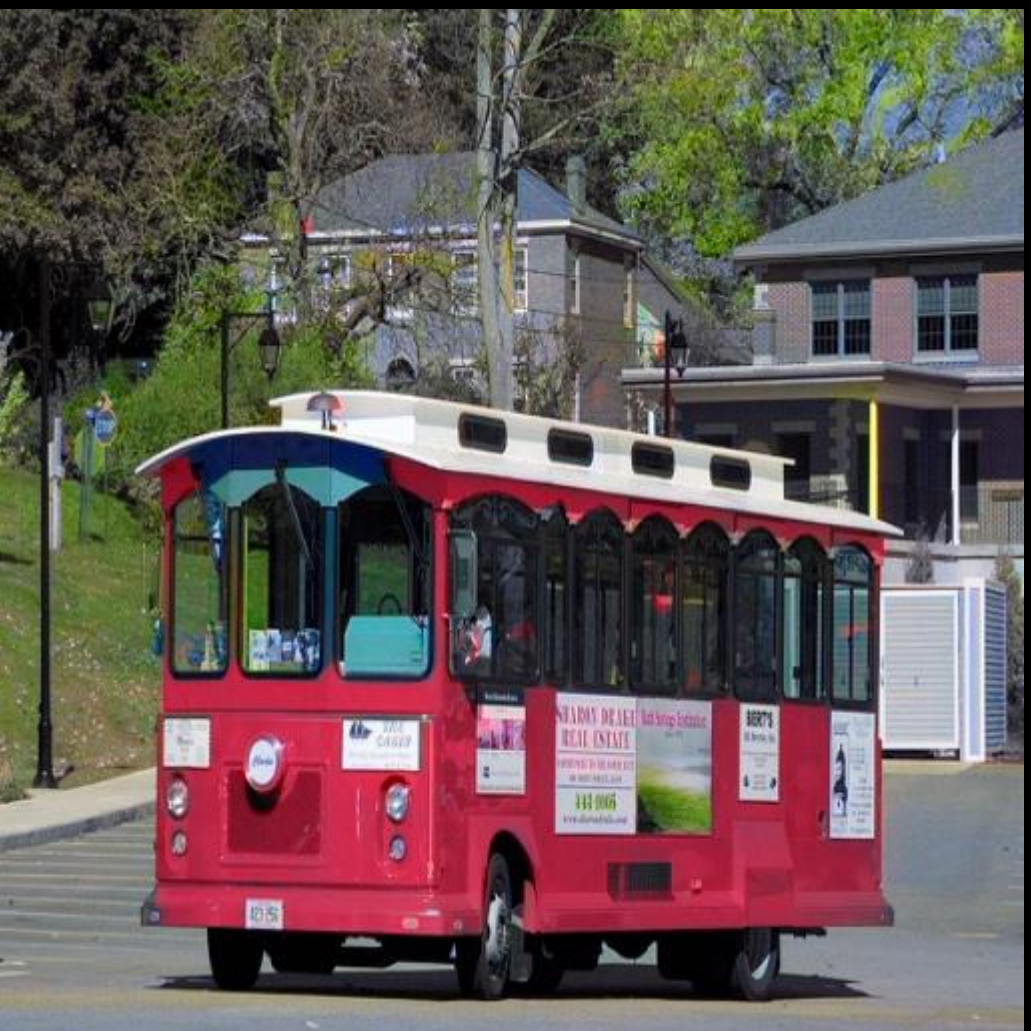

Ours



a white plate with  
a donut and  
napkin sculpture

description

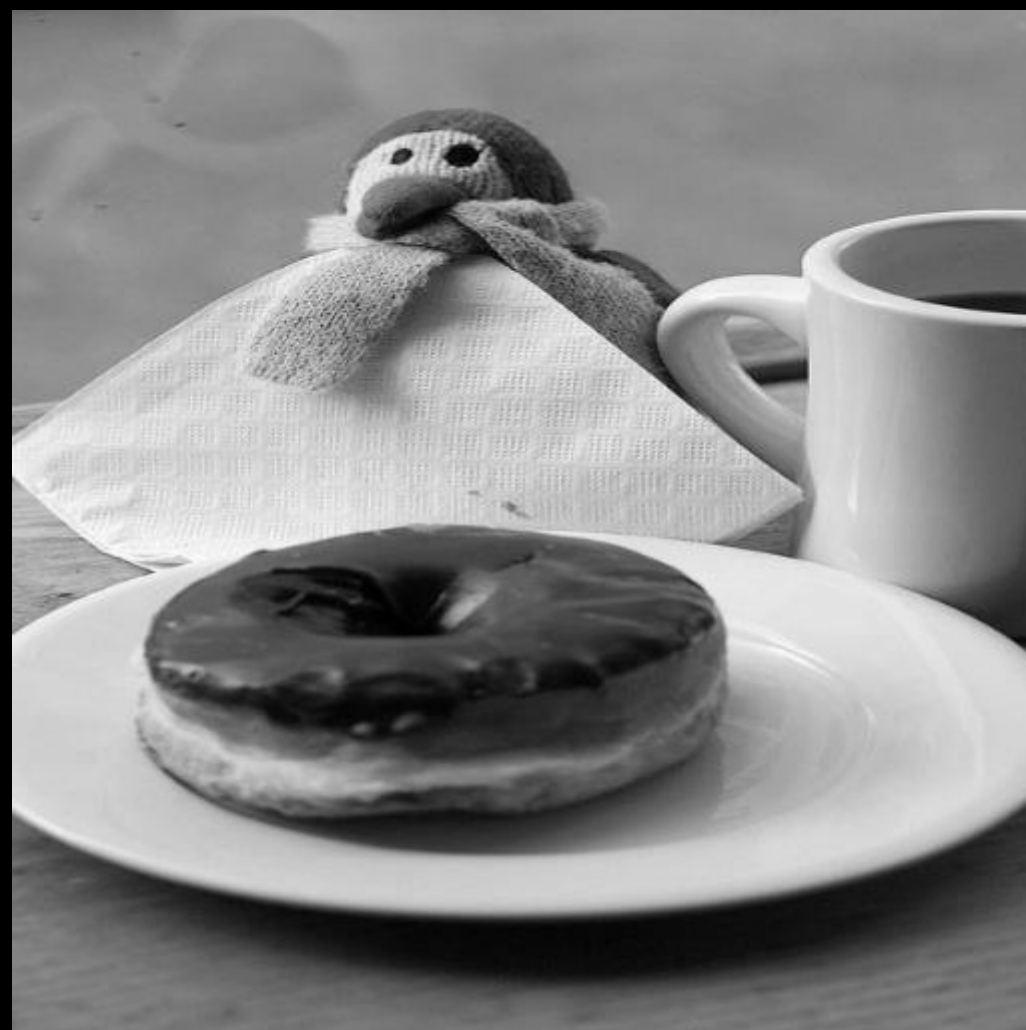

Input

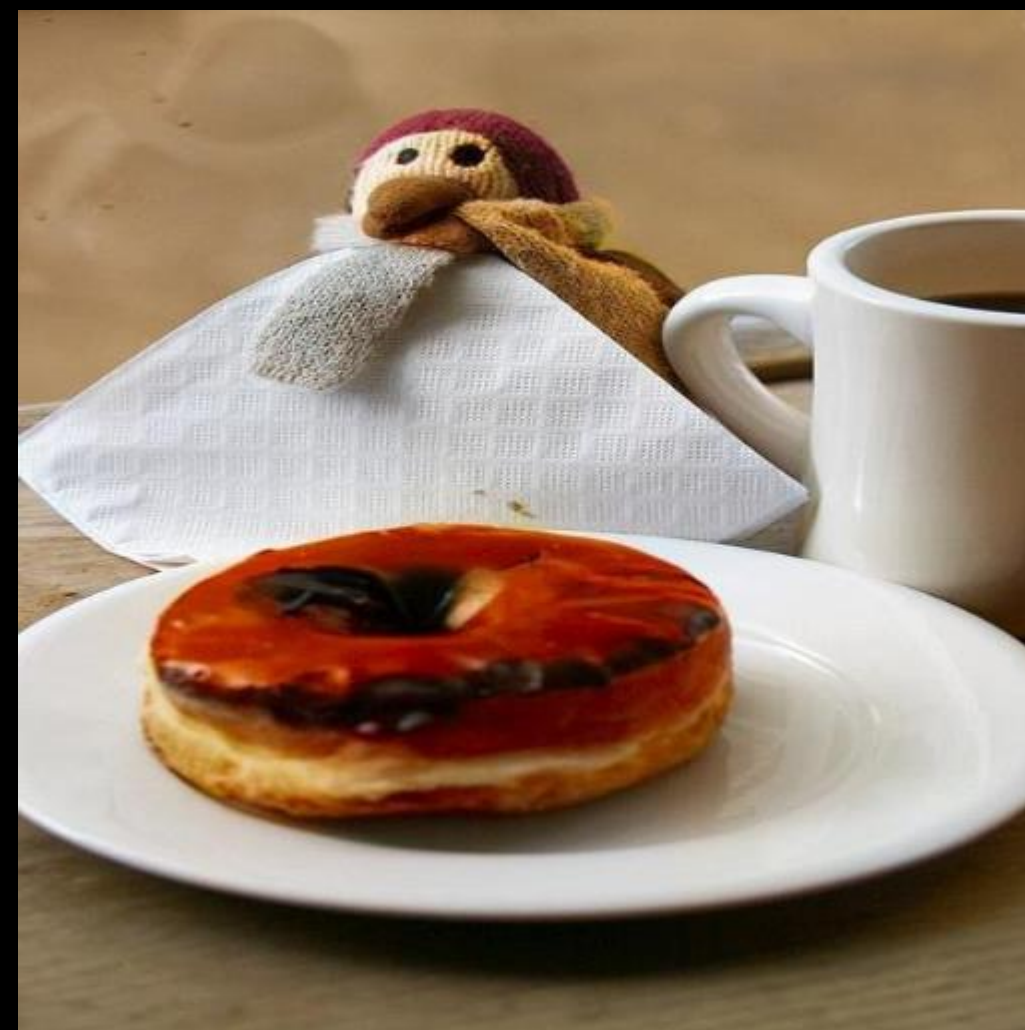

UniColor

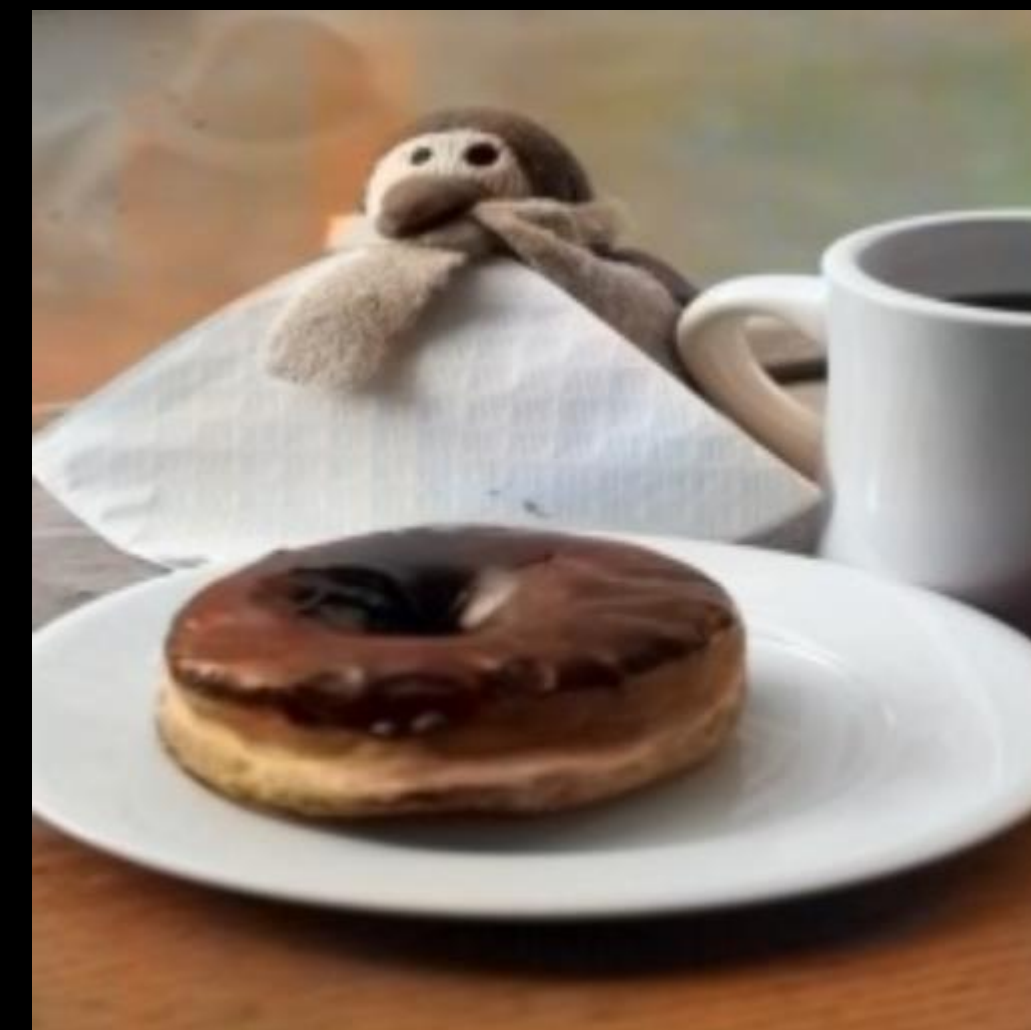

L-CoDe

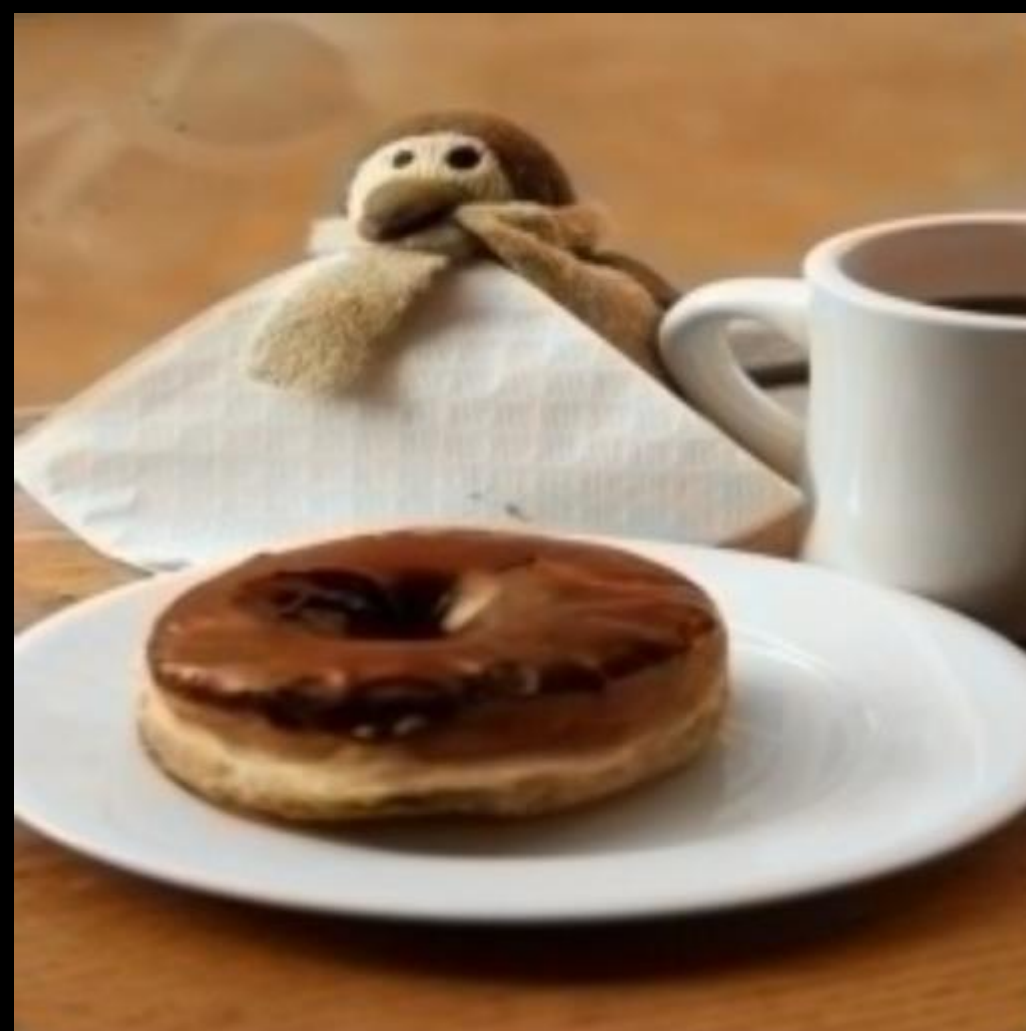

L-CoDer

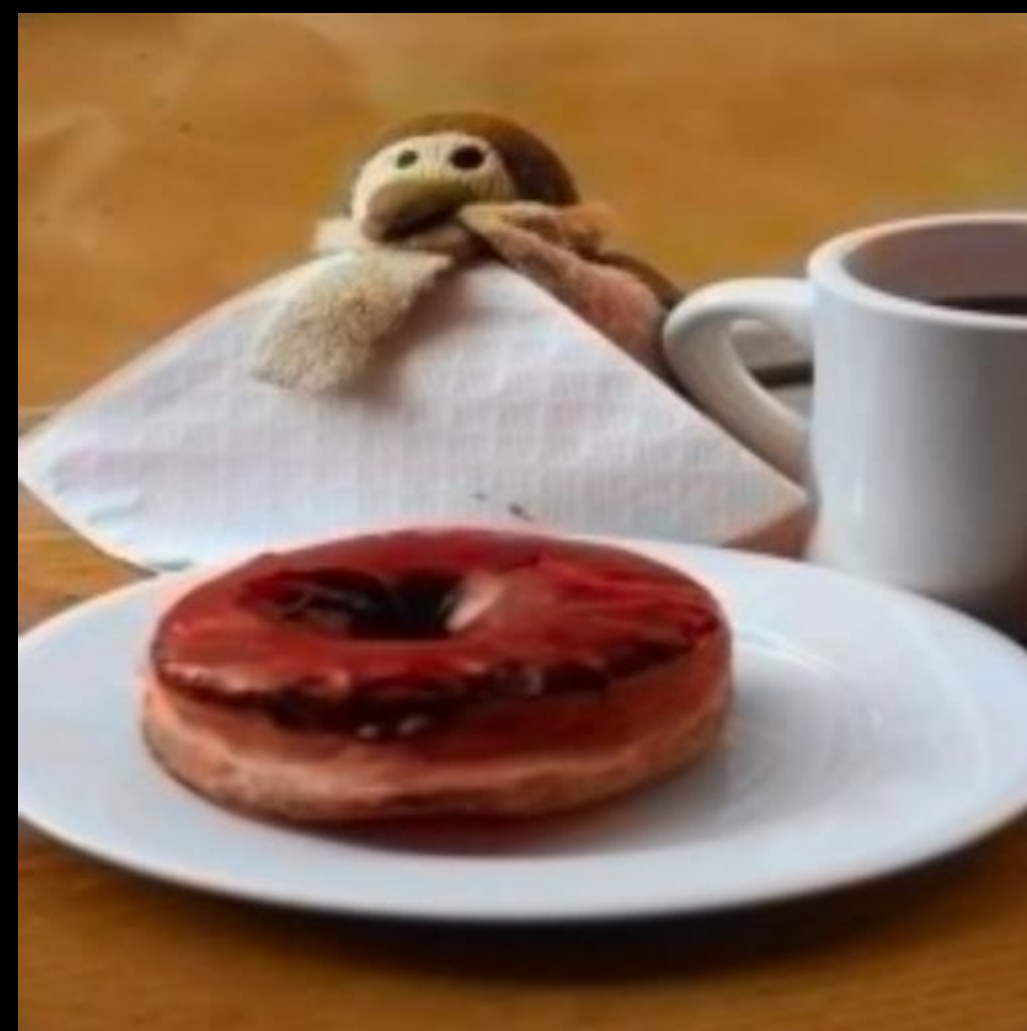

L-CoIns

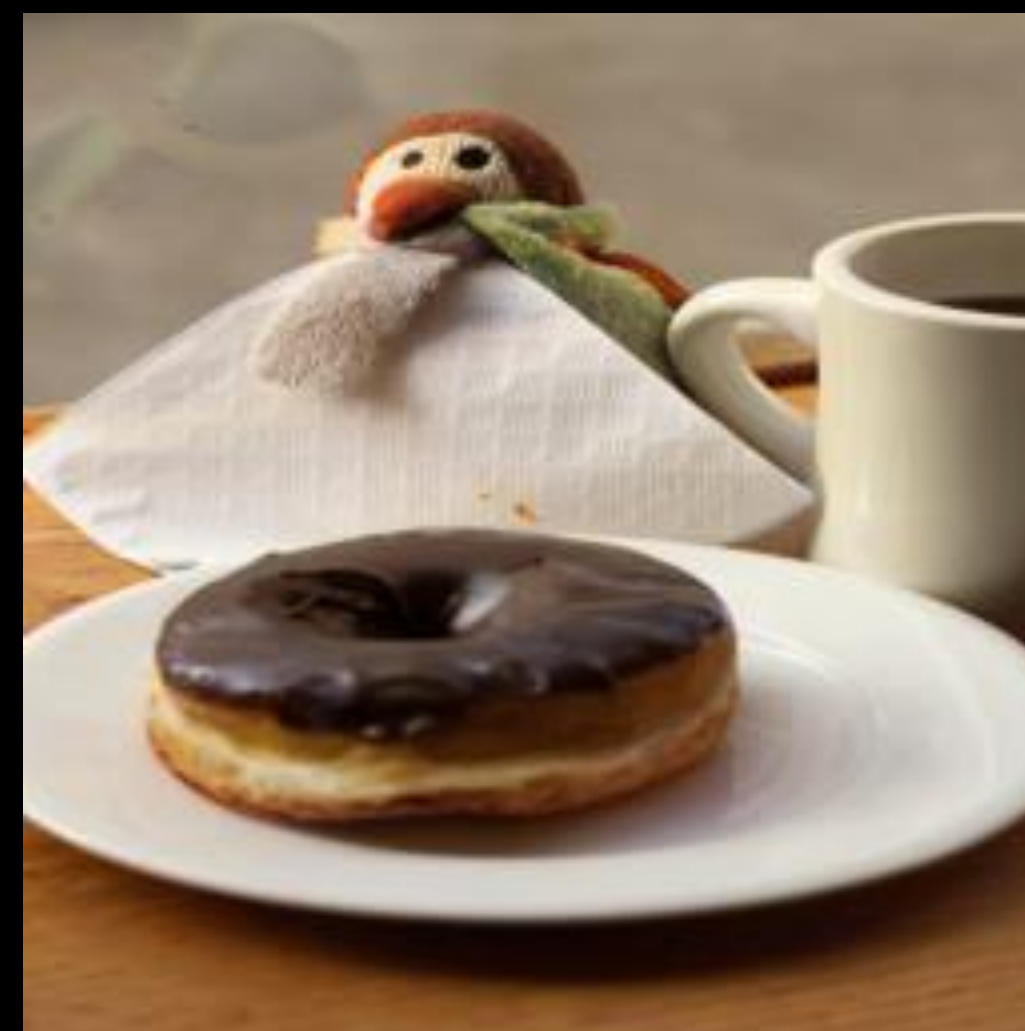

L-CAD

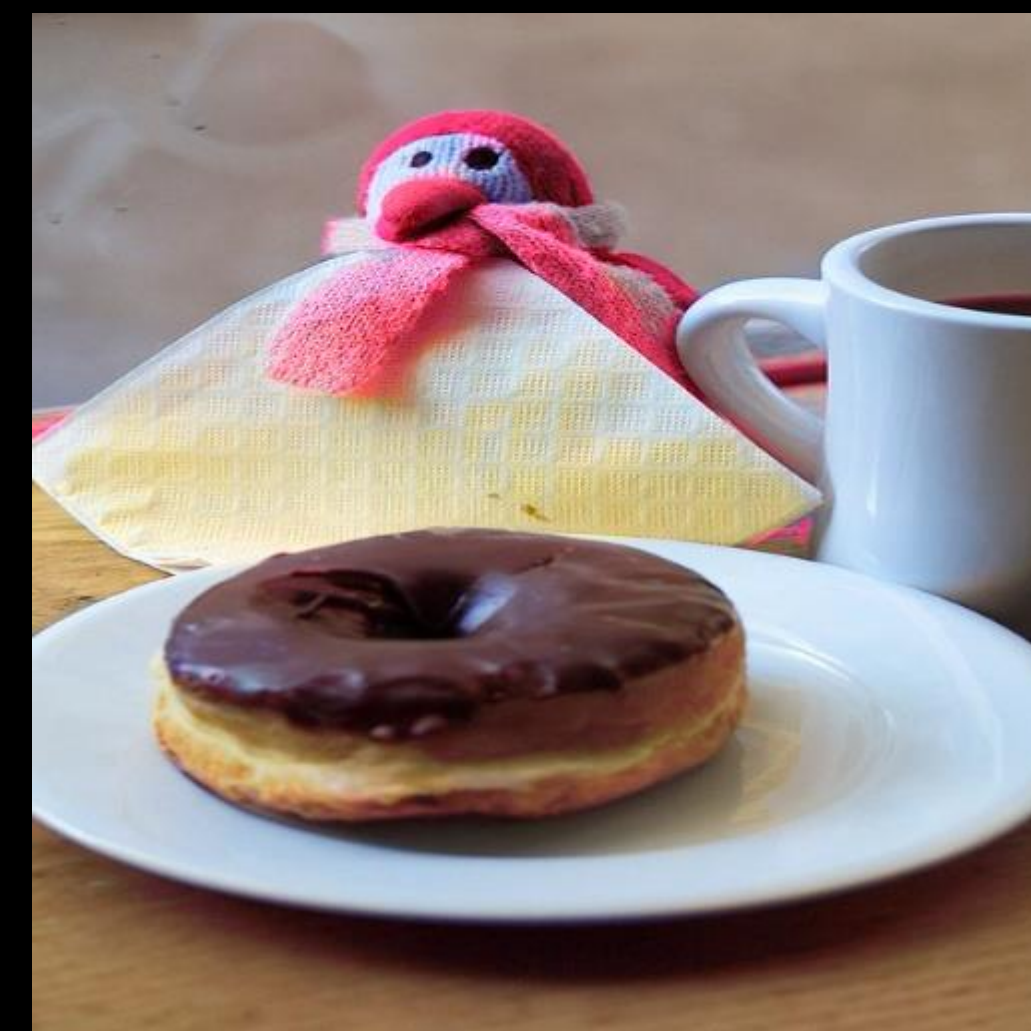

Ours



a large white bus  
that is by a building

description

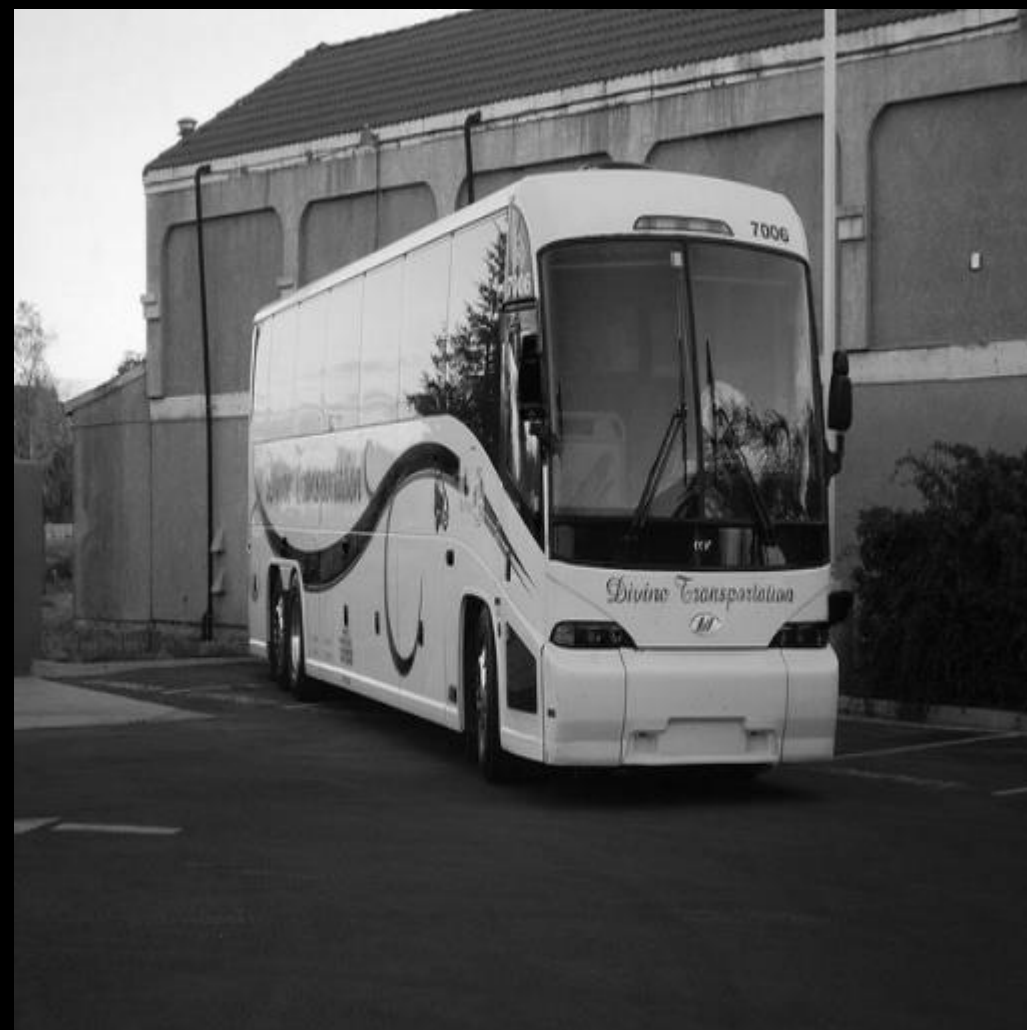

Input

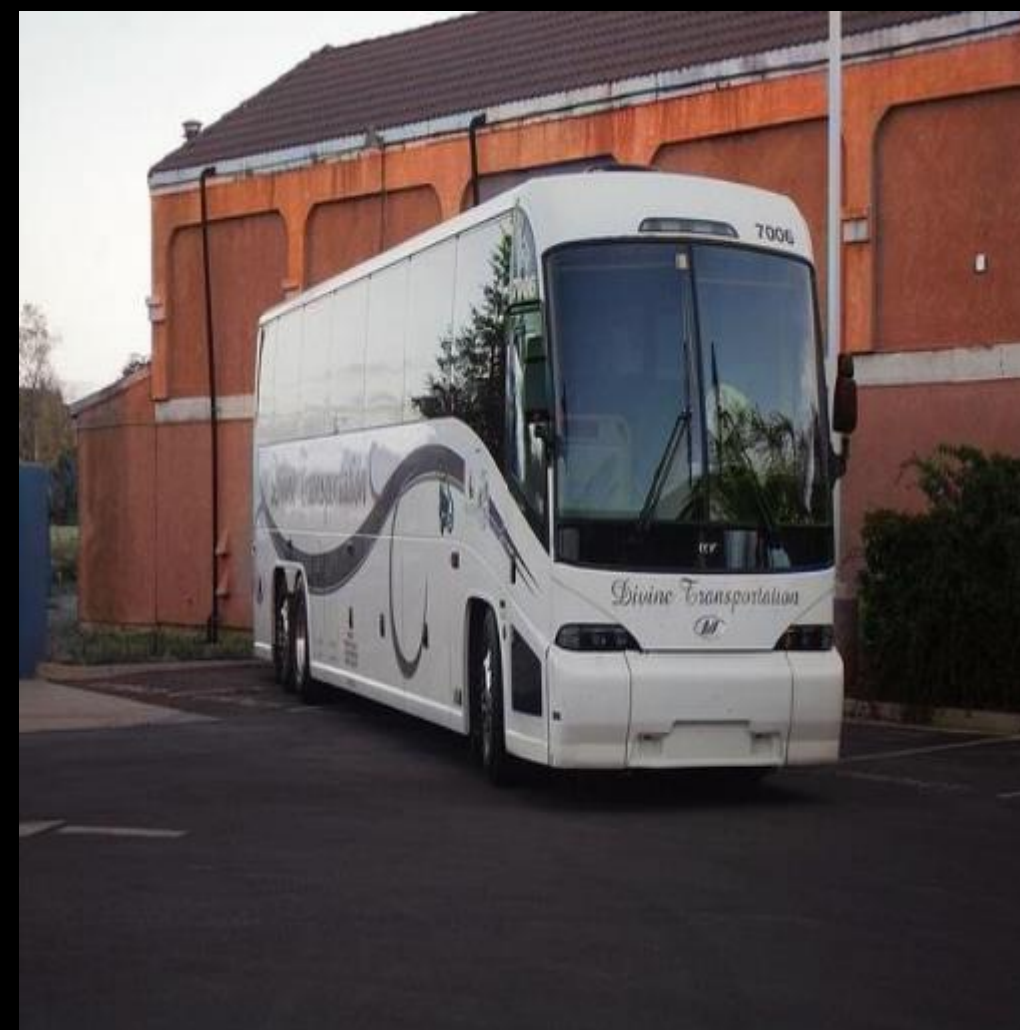

UniColor

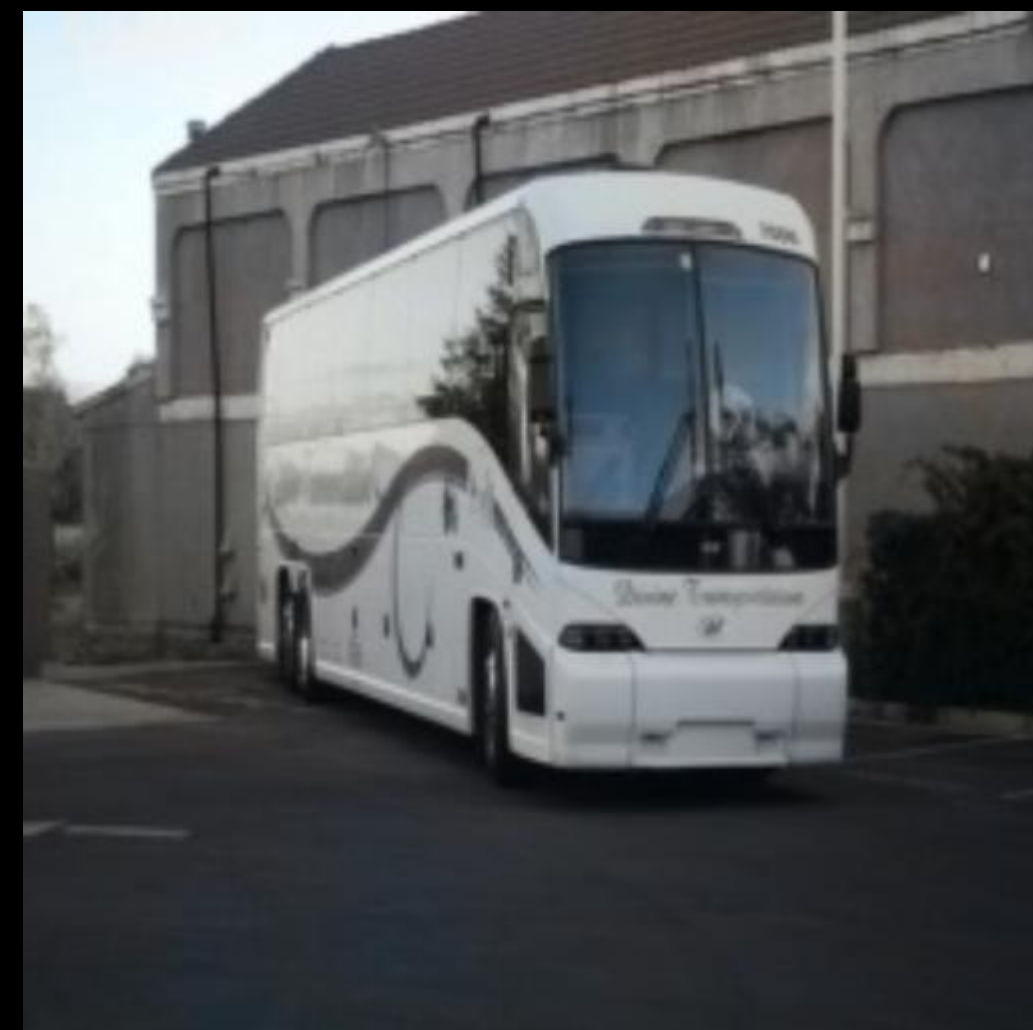

L-CoDe

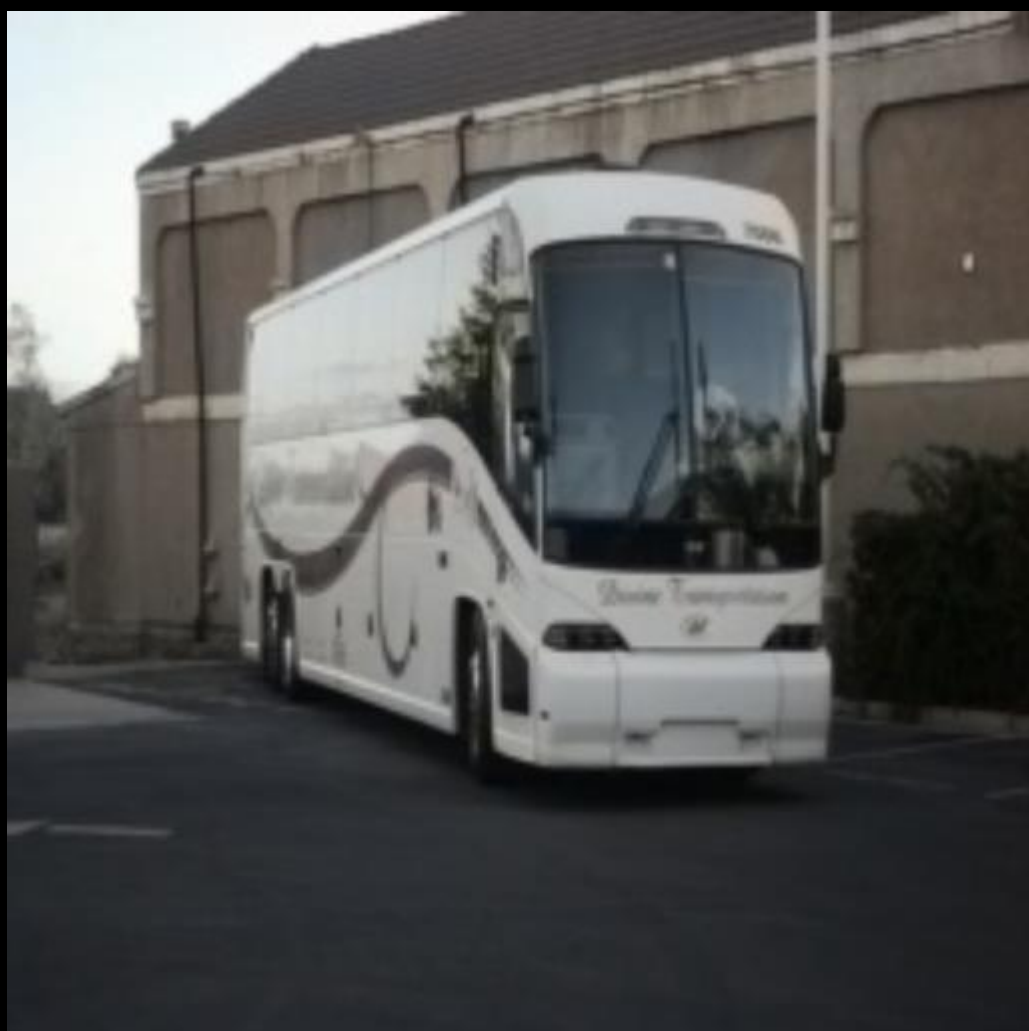

L-CoDer

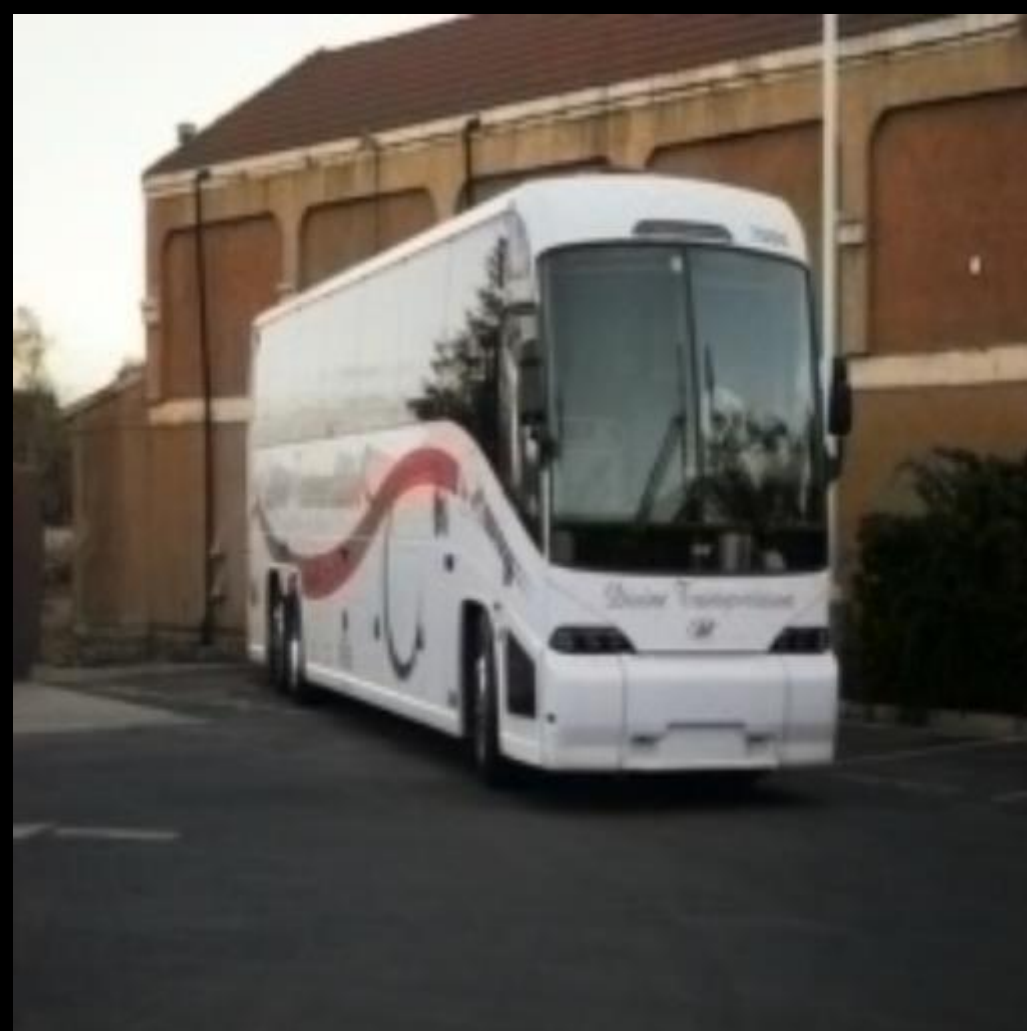

L-CoIns

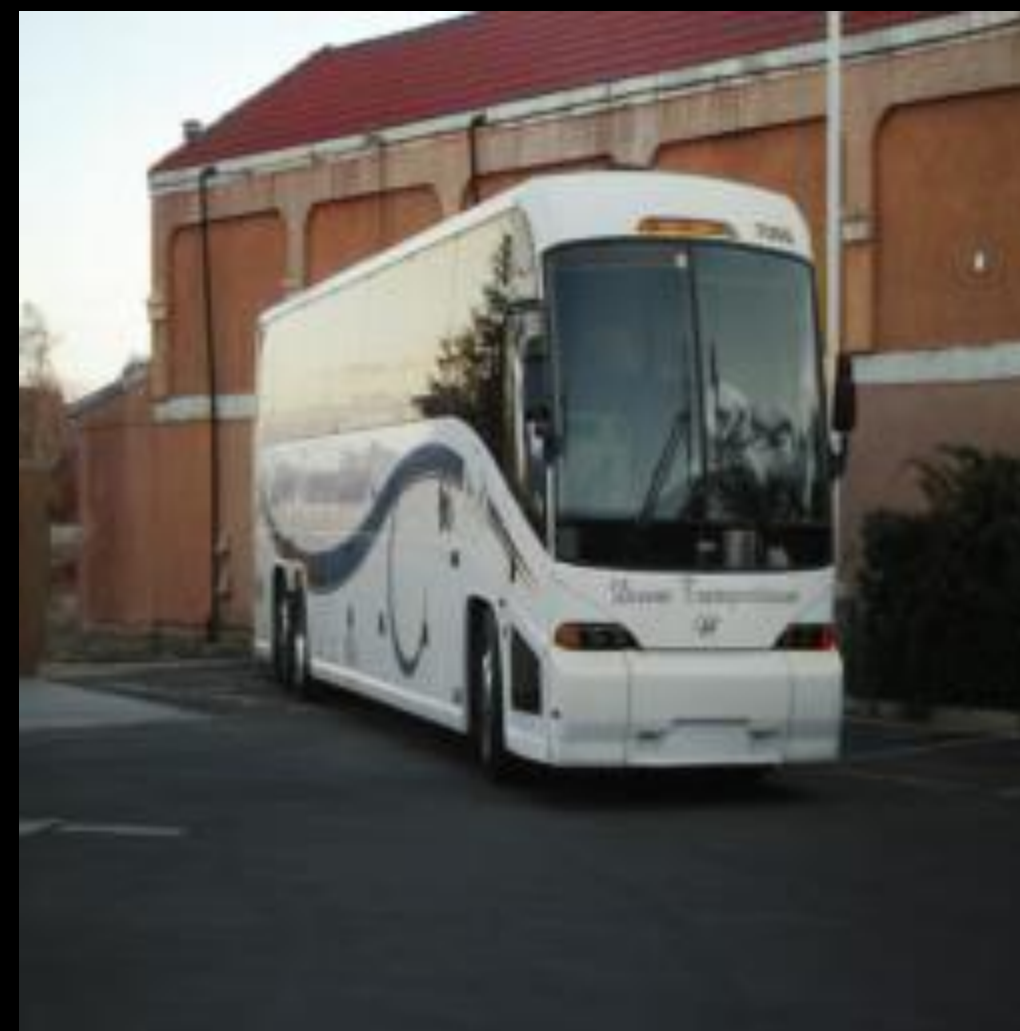

L-CAD

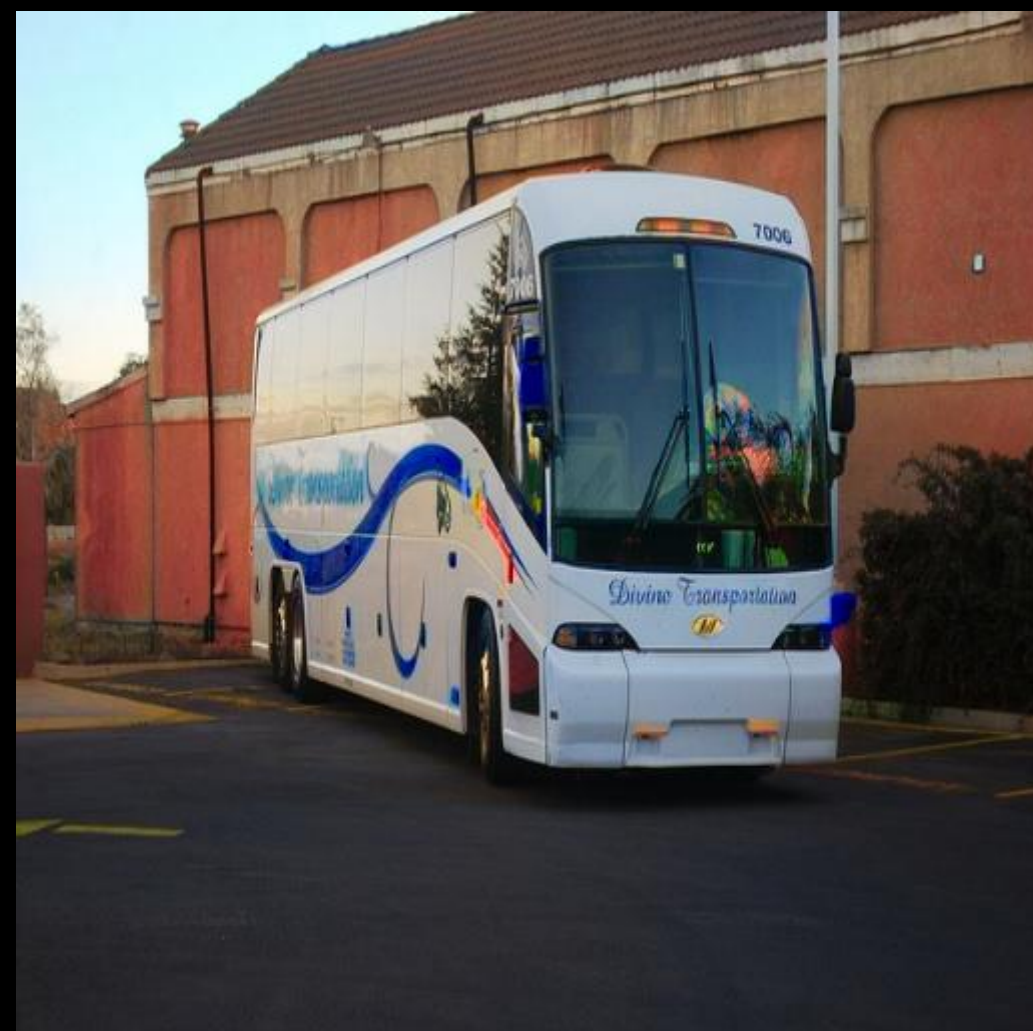

Ours
